# Supplementary material for: Leaf Coloration in Acer palmatum Is Associated with a Positive Regulator ApMYB1 with Potential for Breeding Color-Leafed Plants
Source: MDPI journal article supplement (doi:10.3390/plants11060759), 2022-03-12
Supplement: s1 [file s1]

## Sheet: 11829 DEGs
GeneID	Length	GN_1_FPKM	GN_2_FPKM	GN_3_FPKM	SR_1_FPKM	SR_2_FPKM	SR_3_FPKM	GN-Expression	SR-Expression	log2FoldChange(SR/GN)	Padj	Up/Down-Regulation	Nr	Nt	Swissprot	KEGG	KOG	Interpro	GO
CL10001.Contig2_All	608	2.94	1.78	3.2	0.32	0.72	1.04	23.5509	6.62629	-1.82951	0.00219794	Down	KDO67367.1/2.1e-14/hypothetical protein CISIN_1g044409mg [Citrus sinensis]	XR_001508647.1/0.0/PREDICTED: Citrus sinensis uncharacterized LOC102611897 (LOC102611897), ncRNA	NA	NA	NA	PTHR35755/1.3E-20/--	cellular_component:GO:0016021//integral component of membrane;
CL10006.Contig1_All	501	2.98	4.86	4.74	2.21	1.39	2.1	29.832	14.49	-1.04181	0.042635	Down	NA	NA	NA	NA	NA	NA	NA
CL10011.Contig1_All	1775	12.81	14.55	12.44	26.42	25.65	26.07	387.635	802.18	1.04923	1.61997e-39	Up	XP_015384176.1/6.2e-200/PREDICTED: 2-oxoisovalerate dehydrogenase subunit alpha 1, mitochondrial isoform X2 [Citrus sinensis]	XM_002306633.2/0.0/Populus trichocarpa hypothetical protein (POPTR_0005s20770g) mRNA, complete cds	sp|Q9LPL5|ODBA1_ARATH/6.1e-176/2-oxoisovalerate dehydrogenase subunit alpha 1, mitochondrial OS=Arabidopsis thaliana GN=At1g21400 PE=2 SV=1	cit:102608790/1.2e-200/2-oxoisovalerate dehydrogenase subunit alpha 1, mitochondrial; K00166 2-oxoisovalerate dehydrogenase E1 component alpha subunit [EC:1.2.4.4]	At1g21400/1.4e-175/[C] KOG1182 Branched chain alpha-keto acid dehydrogenase complex, alpha subunit	PF00676/3.9E-94/Dehydrogenase E1 component	molecular_function:GO:0016624//oxidoreductase activity, acting on the aldehyde or oxo group of donors, disulfide as acceptor;
CL10013.Contig1_All	2260	5.04	2.72	1.94	7.69	6.15	6.95	122.811	272.76	1.15119	0.000204593	Up	EOY01199.1/2.5e-238/Indeterminate(ID)-domain 5, putative isoform 2 [Theobroma cacao] >EOY01200.1 Indeterminate(ID)-domain 5, putative isoform 2 [Theobroma cacao] >EOY01201.1 Indeterminate(ID)-domain 5, putative isoform 2 [Theobroma cacao] >EOY01202.1 Indeterminate(ID)-domain 5, putative isoform 2 [Theobroma cacao]	XM_021437667.1/0.0/PREDICTED: Herrania umbratica protein indeterminate-domain 5, chloroplastic-like (LOC110423453), transcript variant X2, mRNA	sp|Q9ZUL3|IDD5_ARATH/5.6e-134/Protein indeterminate-domain 5, chloroplastic OS=Arabidopsis thaliana GN=IDD5 PE=1 SV=1	lja:Lj3g3v0323160.1/2.3e-92/Lj3g3v0323160.1; -; K12309 beta-galactosidase [EC:3.2.1.23]	At2g02070/1.3e-133/[R] KOG1721 FOG: Zn-finger	PTHR10593/5.6E-232/--	NA
CL10019.Contig1_All	649	6.35	6.8	6.84	12.95	15.45	14.54	65.9309	148.031	1.16687	1.37533e-09	Up	XP_020213612.1/2.6e-47/uncharacterized protein LOC109797871 [Cajanus cajan] >KYP70759.1 hypothetical protein KK1_009990 [Cajanus cajan]	XM_018994534.1/0.0/PREDICTED: Juglans regia uncharacterized LOC109012745 (LOC109012745), mRNA	NA	nnu:104602717/2.1e-38/uncharacterized LOC104602717; K06995 uncharacterized protein	NA	PTHR33271/3.7E-73/--	NA
CL10019.Contig2_All	544	4.06	4.04	2.79	9.81	9.46	8.62	29.6827	78.1974	1.3975	1.04367e-06	Up	XP_008235565.1/1.1e-33/PREDICTED: uncharacterized protein LOC103334385 isoform X1 [Prunus mume]	XR_002050392.1/0.0/PREDICTED: Ipomoea nil uncharacterized LOC109158465 (LOC109158465), ncRNA	NA	aip:107627038/6.0e-26/uncharacterized protein LOC107627038; K06995 uncharacterized protein	NA	NA	NA
CL1002.Contig3_All	2452	0.25	0.21	0.37	0.84	0.63	0.41	11.096	26.1471	1.23661	0.0310645	Up	KNA20458.1/1.3e-09/hypothetical protein SOVF_052210 [Spinacia oleracea]	LT594796.1/0.0/Theobroma cacao genome assembly, chromosome: IX	sp|O81024|EKI_ARATH/1.0e-11/Probable ethanolamine kinase OS=Arabidopsis thaliana GN=EMB1187 PE=2 SV=1	soe:110795001/1.9e-10/probable ethanolamine kinase; K00894 ethanolamine kinase [EC:2.7.1.82]	At2g26830/2.4e-11/[I] KOG4720 Ethanolamine kinase	NA	molecular_function:GO:0016301//kinase activity;
CL10023.Contig1_All	1012	6.81	6.07	5.99	17.34	15.94	17.28	101.713	285.488	1.48893	4.70965e-26	Up	XP_005716262.1/7.3e-73/unnamed protein product [Chondrus crispus] >CDF36443.1 unnamed protein product [Chondrus crispus]	FP094082.1/0.0/Phyllostachys edulis cDNA clone: bphyem003g08, full insert sequence	sp|Q9FKT3|UBC30_ARATH/1.3e-69/Ubiquitin-conjugating enzyme E2 30 OS=Arabidopsis thaliana GN=UBC30 PE=1 SV=1	gsl:Gasu_60520/4.1e-73/ubiquitin-conjugating enzyme E2; K06689 ubiquitin-conjugating enzyme E2 D [EC:2.3.2.23]	SPBC119.02/1.2e-78/[O] KOG0417 Ubiquitin-protein ligase	PF00179/3.9E-52/Ubiquitin-conjugating enzyme	molecular_function:GO:0005524//ATP binding;GO:0016874//ligase activity;
CL10023.Contig3_All	915	4.2	3.85	3.92	12.74	12.91	12.73	58.0095	194.045	1.74203	1.87124e-23	Up	XP_005716262.1/6.7e-73/unnamed protein product [Chondrus crispus] >CDF36443.1 unnamed protein product [Chondrus crispus]	FP094082.1/0.0/Phyllostachys edulis cDNA clone: bphyem003g08, full insert sequence	sp|Q9FKT3|UBC30_ARATH/1.1e-69/Ubiquitin-conjugating enzyme E2 30 OS=Arabidopsis thaliana GN=UBC30 PE=1 SV=1	gsl:Gasu_60520/3.8e-73/ubiquitin-conjugating enzyme E2; K06689 ubiquitin-conjugating enzyme E2 D [EC:2.3.2.23]	SPBC119.02/1.1e-78/[O] KOG0417 Ubiquitin-protein ligase	PS00183/-/Ubiquitin-conjugating enzymes active site.	molecular_function:GO:0005524//ATP binding;GO:0016874//ligase activity;
CL1003.Contig24_All	2767	0	0	0	0.77	0.39	0.83	0.861677	31.0712	5.17229	8.67961e-10	Up	XP_020535639.1/1.3e-143/cleavage stimulation factor subunit 77 isoform X5 [Jatropha curcas]	XM_006481232.2/0.0/PREDICTED: Citrus sinensis cleavage stimulation factor subunit 77 (LOC102629682), transcript variant X2, mRNA	sp|Q8GUP1|CTF77_ARATH/5.8e-125/Cleavage stimulation factor subunit 77 OS=Arabidopsis thaliana GN=CSTF77 PE=1 SV=1	jcu:105635764/1.9e-144/cleavage stimulation factor subunit 77 isoform X2; K14408 cleavage stimulation factor subunit 3	At1g17760/1.8e-113/[A] KOG1914 mRNA cleavage and polyadenylation factor I complex, subunit RNA14	PTHR19980/1.6E-70/--	NA
CL1003.Contig25_All	2642	0	0	0	0.3	0.14	0.48	0.786565	12.97	4.04347	1.87939e-05	Up	XP_006429695.1/2.1e-284/hypothetical protein CICLE_v10011123mg [Citrus clementina] >XP_006481294.1 PREDICTED: cleavage stimulation factor subunit 77 isoform X1 [Citrus sinensis] >ESR42935.1 hypothetical protein CICLE_v10011123mg [Citrus clementina]	XM_006481231.2/0.0/PREDICTED: Citrus sinensis cleavage stimulation factor subunit 77 (LOC102629682), transcript variant X1, mRNA	sp|Q8GUP1|CTF77_ARATH/2.3e-219/Cleavage stimulation factor subunit 77 OS=Arabidopsis thaliana GN=CSTF77 PE=1 SV=1	cit:102629682/3.1e-285/cleavage stimulation factor subunit 77; K14408 cleavage stimulation factor subunit 3	At1g17760/4.1e-211/[A] KOG1914 mRNA cleavage and polyadenylation factor I complex, subunit RNA14	PF05843/1.9E-71/Suppressor of forked protein (Suf)	biological_process:GO:0006397//mRNA processing;cellular_component:GO:0005634//nucleus;
CL1003.Contig26_All	2611	2.46	1.63	0.71	0.46	0.45	0.83	67.9565	27.274	-1.31709	0.0132734	Down	XP_006429695.1/0.0e+00/hypothetical protein CICLE_v10011123mg [Citrus clementina] >XP_006481294.1 PREDICTED: cleavage stimulation factor subunit 77 isoform X1 [Citrus sinensis] >ESR42935.1 hypothetical protein CICLE_v10011123mg [Citrus clementina]	XM_006481231.2/0.0/PREDICTED: Citrus sinensis cleavage stimulation factor subunit 77 (LOC102629682), transcript variant X1, mRNA	sp|Q8GUP1|CTF77_ARATH/1.4e-298/Cleavage stimulation factor subunit 77 OS=Arabidopsis thaliana GN=CSTF77 PE=1 SV=1	cit:102629682/0.0e+00/cleavage stimulation factor subunit 77; K14408 cleavage stimulation factor subunit 3	At1g17760/2.6e-290/[A] KOG1914 mRNA cleavage and polyadenylation factor I complex, subunit RNA14	PTHR19980/0.0/--	biological_process:GO:0006397//mRNA processing;cellular_component:GO:0005634//nucleus;
CL1003.Contig5_All	2833	0	0	0	0.48	0.74	0.71	0.833424	31.0186	5.21794	4.36106e-10	Up	XP_006429695.1/7.6e-285/hypothetical protein CICLE_v10011123mg [Citrus clementina] >XP_006481294.1 PREDICTED: cleavage stimulation factor subunit 77 isoform X1 [Citrus sinensis] >ESR42935.1 hypothetical protein CICLE_v10011123mg [Citrus clementina]	XM_006481231.2/0.0/PREDICTED: Citrus sinensis cleavage stimulation factor subunit 77 (LOC102629682), transcript variant X1, mRNA	sp|Q8GUP1|CTF77_ARATH/8.4e-220/Cleavage stimulation factor subunit 77 OS=Arabidopsis thaliana GN=CSTF77 PE=1 SV=1	cit:102629682/1.1e-285/cleavage stimulation factor subunit 77; K14408 cleavage stimulation factor subunit 3	At1g17760/1.5e-211/[A] KOG1914 mRNA cleavage and polyadenylation factor I complex, subunit RNA14	PTHR19980/2.2E-224/--	biological_process:GO:0006397//mRNA processing;cellular_component:GO:0005634//nucleus;
CL10040.Contig1_All	1785	1.31	1.44	1.95	3.97	4.26	3.43	46.4815	119.825	1.3662	1.69863e-08	Up	OSX80488.1/1.6e-83/hypothetical protein BU14_0051s0008 [Porphyra umbilicalis]	NA	sp|P48630|FD6E1_SOYBN/3.4e-78/Omega-6 fatty acid desaturase, endoplasmic reticulum isozyme 1 OS=Glycine max GN=FAD2-1 PE=2 SV=1	ccp:CHC_T00008296001/5.1e-82/delta12 fatty acid desaturase; K10256 omega-6 fatty acid desaturase / acyl-lipid omega-6 desaturase (Delta-12 desaturase) [EC:1.14.19.6 1.14.19.22]	At3g12120/3.2e-74/[I] TWOG0155 Oleate desaturase/linoleate desaturase	PTHR32100:SF0/9.3E-216/--	biological_process:GO:0006629//lipid metabolic process;cellular_component:GO:0016021//integral component of membrane;molecular_function:GO:0045485//omega-6 fatty acid desaturase activity;GO:0016717//oxidoreductase activity, acting on paired donors, with oxidation of a pair of donors resulting in the reduction of molecular oxygen to two molecules of water;
CL10041.Contig4_All	1235	0.24	0.19	0.2	1.62	1.88	1.31	4.81761	32.6337	2.75997	1.75114e-07	Up	NA	NA	NA	NA	NA	NA	NA
CL10041.Contig6_All	4386	0.51	0.52	0.61	1.75	1.78	1.78	40.6639	137.589	1.75855	9.96844e-17	Up	XP_006421534.1/1.3e-254/hypothetical protein CICLE_v10004702mg [Citrus clementina] >ESR34774.1 hypothetical protein CICLE_v10004702mg [Citrus clementina]	XM_006421471.1/0.0/Citrus clementina hypothetical protein (CICLE_v10004702mg) mRNA, complete cds	sp|Q9FKG3|PFKA4_ARATH/3.1e-229/ATP-dependent 6-phosphofructokinase 4, chloroplastic OS=Arabidopsis thaliana GN=PFK4 PE=1 SV=1	cit:102625221/1.0e-253/ATP-dependent 6-phosphofructokinase 4, chloroplastic; K00850 6-phosphofructokinase 1 [EC:2.7.1.11]	At5g61580/9.1e-224/[G] KOG2440 Pyrophosphate-dependent phosphofructo-1-kinase	PTHR13697/0.0/--	biological_process:GO:0006002//fructose 6-phosphate metabolic process;cellular_component:GO:0005737//cytoplasm;molecular_function:GO:0046872//metal ion binding;GO:0003872//6-phosphofructokinase activity;GO:0005524//ATP binding;
CL10045.Contig2_All	2042	3.41	3.38	3.37	6.69	7.01	6.84	114.762	244.211	1.08948	6.12352e-15	Up	NA	HG670306.1/0.0/Triticum aestivum chromosome 3B, genomic scaffold, cultivar Chinese Spring	NA	NA	NA	NA	NA
CL10046.Contig1_All	972	1.19	1.68	1.39	0.44	0.49	0.55	21.4493	8.44893	-1.34409	0.0158935	Down	NA	NA	NA	NA	NA	NA	NA
CL1005.Contig5_All	1149	0.42	0.83	0.9	1.48	2.06	1.38	13.6119	31.4623	1.20876	0.0158749	Up	XP_005714435.1/5.3e-11/unnamed protein product [Chondrus crispus] >CDF34616.1 unnamed protein product [Chondrus crispus]	NA	NA	egu:105057227/1.3e-06/uncharacterized protein DDB_G0271670-like; K03006 DNA-directed RNA polymerase II subunit RPB1 [EC:2.7.7.6]	NA	PF10281/1.3E-11/Putative stress-responsive nuclear envelope protein	molecular_function:GO:0004252//serine-type endopeptidase activity;
CL10051.Contig2_All	1907	3.98	5.24	4.83	10.67	11.87	11.78	147.664	379.242	1.3608	4.30671e-25	Up	XP_001780991.1/3.3e-98/predicted protein [Physcomitrella patens] >EDQ54175.1 predicted protein [Physcomitrella patens]	NA	sp|P49315|CATA1_NICPL/5.5e-82/Catalase isozyme 1 (Fragment) OS=Nicotiana plumbaginifolia GN=CAT1 PE=2 SV=1	egr:104448928/4.6e-81/catalase isozyme 3; K03781 catalase [EC:1.11.1.6]	CE22477/2.6e-98/[P] KOG0047 Catalase	PR00067/5.4E-54/Catalase signature	biological_process:GO:0042744//hydrogen peroxide catabolic process;GO:0042542//response to hydrogen peroxide;cellular_component:GO:0005777//peroxisome;GO:0005739//mitochondrion;molecular_function:GO:0046872//metal ion binding;GO:0020037//heme binding;GO:0004096//catalase activity;
CL10051.Contig3_All	610	0.42	0.52	0.32	1.8	1.66	1.76	4.34022	16.3127	1.91015	0.00302728	Up	XP_001752199.1/3.7e-35/predicted protein [Physcomitrella patens] >EDQ82932.1 predicted protein [Physcomitrella patens]	NA	sp|P48351|CATA2_CUCPE/9.7e-33/Catalase isozyme 2 OS=Cucurbita pepo GN=CAT2 PE=2 SV=1	pmum:103336677/6.2e-32/catalase isozyme 1-like isoform X1; K03781 catalase [EC:1.11.1.6]	CE22477/3.5e-33/[P] KOG0047 Catalase	SM01060/1.1E-8/--	biological_process:GO:0006979//response to oxidative stress;GO:0042744//hydrogen peroxide catabolic process;GO:0042542//response to hydrogen peroxide;cellular_component:GO:0005777//peroxisome;GO:0005739//mitochondrion;molecular_function:GO:0046872//metal ion binding;GO:0020037//heme binding;GO:0004096//catalase activity;
CL10056.Contig1_All	699	0.54	0.64	0.73	1.54	1.69	1.71	7.12575	18.0951	1.34448	0.0241415	Up	XP_006467093.1/6.7e-25/PREDICTED: amino acid transporter ANTL1 [Citrus sinensis]	XM_002521682.2/0.0/PREDICTED: Ricinus communis amino acid transporter ANTL1 (LOC8281320), mRNA	sp|F4ILY9|AVT3B_ARATH/1.7e-17/Amino acid transporter AVT3B OS=Arabidopsis thaliana GN=AVT3B PE=2 SV=1	cit:102609803/1.0e-25/amino acid transporter ANTL1; K14209 solute carrier family 36 (proton-coupled amino acid transporter)	At4g38250/4.1e-17/[E] KOG1304 Amino acid transporters	NA	cellular_component:GO:0016021//integral component of membrane;
CL10056.Contig2_All	480	0.28	0.27	1.13	2.52	2.47	2.6	4.46031	17.8854	2.00356	0.00311364	Up	XP_006467093.1/1.4e-26/PREDICTED: amino acid transporter ANTL1 [Citrus sinensis]	XM_002521682.2/0.0/PREDICTED: Ricinus communis amino acid transporter ANTL1 (LOC8281320), mRNA	sp|Q9FKY3|AVT3A_ARATH/2.2e-19/Amino acid transporter AVT3A OS=Arabidopsis thaliana GN=AVT3A PE=1 SV=1	cit:102609803/2.1e-27/amino acid transporter ANTL1; K14209 solute carrier family 36 (proton-coupled amino acid transporter)	At5g65990/5.1e-19/[E] KOG1304 Amino acid transporters	NA	cellular_component:GO:0016021//integral component of membrane;
CL10060.Contig1_All	1490	20.75	17.42	18.75	6.85	8.22	8.72	460.323	203.594	-1.17696	1.68147e-20	Down	AFF18848.1/2.3e-163/APX [Dimocarpus longan]	JF815481.1/0.0/Dimocarpus longan clone Unigene6305 APX mRNA, complete cds	sp|Q9THX6|TL29_SOLLC/8.2e-134/Thylakoid lumenal 29 kDa protein, chloroplastic OS=Solanum lycopersicum GN=CLEB3J9 PE=3 SV=1	jcu:105630648/6.6e-152/APX; thylakoid lumenal 29 kDa protein, chloroplastic; K00434 L-ascorbate peroxidase [EC:1.11.1.11]	At4g09010/1.3e-129/[R] TWOG0189 Peroxidase	PR00459/2.6E-10/Plant ascorbate peroxidase signature	biological_process:GO:0006979//response to oxidative stress;molecular_function:GO:0020037//heme binding;GO:0016688//L-ascorbate peroxidase activity;GO:0004601//peroxidase activity;
CL10060.Contig2_All	1569	16.7	16.7	16.59	7.44	6.48	7.71	427.269	195.191	-1.13026	3.74131e-25	Down	AFF18848.1/2.4e-163/APX [Dimocarpus longan]	JF815481.1/0.0/Dimocarpus longan clone Unigene6305 APX mRNA, complete cds	sp|Q9THX6|TL29_SOLLC/8.7e-134/Thylakoid lumenal 29 kDa protein, chloroplastic OS=Solanum lycopersicum GN=CLEB3J9 PE=3 SV=1	jcu:105630648/6.9e-152/APX; thylakoid lumenal 29 kDa protein, chloroplastic; K00434 L-ascorbate peroxidase [EC:1.11.1.11]	At4g09010/1.4e-129/[R] TWOG0189 Peroxidase	PR00459/2.6E-10/Plant ascorbate peroxidase signature	biological_process:GO:0006979//response to oxidative stress;molecular_function:GO:0020037//heme binding;GO:0016688//L-ascorbate peroxidase activity;GO:0004601//peroxidase activity;
CL10067.Contig1_All	1579	2.27	1.98	2.23	0.31	0.11	0.2	54.6335	6.08428	-3.16663	2.01064e-12	Down	XP_008904902.1/1.3e-47/TIGR01456 family HAD hydrolase [Phytophthora parasitica INRA-310] >ETN09756.1 TIGR01456 family HAD hydrolase [Phytophthora parasitica INRA-310] >ETO76401.1 TIGR01456 family HAD hydrolase [Phytophthora parasitica P1976]	NA	sp|Q9SN46|LRX5_ARATH/1.2e-13/Leucine-rich repeat extensin-like protein 5 OS=Arabidopsis thaliana GN=LRX5 PE=2 SV=2	bdi:100835393/1.9e-11/nuclear pore complex protein NUP62; K14306 nuclear pore complex protein Nup62	SPAC22A12.08c_1/3.8e-63/[R] KOG1618 Predicted phosphatase	PTHR14269/1.4E-186/--	molecular_function:GO:0016787//hydrolase activity;
CL10067.Contig2_All	1771	2.87	2.73	2.8	0.47	0.65	0.36	81.0577	15.7348	-2.36499	1.78382e-13	Down	XP_008904902.1/7.1e-47/TIGR01456 family HAD hydrolase [Phytophthora parasitica INRA-310] >ETN09756.1 TIGR01456 family HAD hydrolase [Phytophthora parasitica INRA-310] >ETO76401.1 TIGR01456 family HAD hydrolase [Phytophthora parasitica P1976]	NA	sp|Q8L7F7|NUP62_ARATH/1.5e-12/Nuclear pore complex protein NUP62 OS=Arabidopsis thaliana GN=NUP62 PE=1 SV=1	soe:110800329/1.0e-13/nuclear pore complex protein NUP62; K14306 nuclear pore complex protein Nup62	Hs4505285/1.5e-23/[WV] KOG1216 von Willebrand factor and related coagulation proteins	PTHR14269/1.8E-188/--	molecular_function:GO:0016787//hydrolase activity;
CL10070.Contig1_All	3291	2.47	2.6	2.14	0.98	0.87	0.97	132.663	55.4841	-1.25761	1.93017e-09	Down	XP_006419578.1/0.0e+00/hypothetical protein CICLE_v10004211mg [Citrus clementina] >ESR32818.1 hypothetical protein CICLE_v10004211mg [Citrus clementina]	XM_006489023.2/0.0/PREDICTED: Citrus sinensis isoleucine--tRNA ligase, chloroplastic/mitochondrial (LOC102618088), mRNA	sp|Q8RXK8|SYIM_ARATH/0.0e+00/Isoleucine--tRNA ligase, chloroplastic/mitochondrial OS=Arabidopsis thaliana GN=OVA2 PE=2 SV=1	cit:102618088/0.0e+00/isoleucine--tRNA ligase, chloroplastic/mitochondrial; K01870 isoleucyl-tRNA synthetase [EC:6.1.1.5]	At5g49030/0.0e+00/[J] KOG0433 Isoleucyl-tRNA synthetase	PF00133/4.2E-189/tRNA synthetases class I (I, L, M and V)	biological_process:GO:0006428//isoleucyl-tRNA aminoacylation;cellular_component:GO:0005737//cytoplasm;molecular_function:GO:0005524//ATP binding;GO:0002161//aminoacyl-tRNA editing activity;GO:0000049//tRNA binding;GO:0004822//isoleucine-tRNA ligase activity;
CL10070.Contig2_All	3697	3.02	3.24	3.2	1.08	1.17	1.33	196.007	78.9555	-1.3118	7.0734e-15	Down	XP_006489086.1/0.0e+00/PREDICTED: isoleucine--tRNA ligase, chloroplastic/mitochondrial [Citrus sinensis]	XM_006489023.2/0.0/PREDICTED: Citrus sinensis isoleucine--tRNA ligase, chloroplastic/mitochondrial (LOC102618088), mRNA	sp|Q8RXK8|SYIM_ARATH/0.0e+00/Isoleucine--tRNA ligase, chloroplastic/mitochondrial OS=Arabidopsis thaliana GN=OVA2 PE=2 SV=1	cit:102618088/0.0e+00/isoleucine--tRNA ligase, chloroplastic/mitochondrial; K01870 isoleucyl-tRNA synthetase [EC:6.1.1.5]	At5g49030/0.0e+00/[J] KOG0433 Isoleucyl-tRNA synthetase	PF08264/7.8E-31/Anticodon-binding domain of tRNA	biological_process:GO:0006428//isoleucyl-tRNA aminoacylation;cellular_component:GO:0005737//cytoplasm;molecular_function:GO:0005524//ATP binding;GO:0002161//aminoacyl-tRNA editing activity;GO:0000049//tRNA binding;GO:0004822//isoleucine-tRNA ligase activity;
CL10076.Contig2_All	639	1.39	0.99	1.82	0.4	0.29	0.1	12.975	3.25029	-1.9971	0.0089043	Down	NA	NA	NA	NA	NA	NA	NA
CL10078.Contig1_All	3969	3.28	2.87	2.76	1.22	0.8	0.38	197.266	57.796	-1.7711	3.62707e-08	Down	XP_006468910.1/0.0e+00/PREDICTED: LRR receptor-like serine/threonine-protein kinase RPK2 [Citrus sinensis] >XP_006468911.1 PREDICTED: LRR receptor-like serine/threonine-protein kinase RPK2 [Citrus sinensis]	XM_006468848.2/0.0/PREDICTED: Citrus sinensis LRR receptor-like serine/threonine-protein kinase RPK2 (LOC102627319), transcript variant X2, mRNA	sp|Q9S7I6|RPK2_ARATH/1.4e-244/LRR receptor-like serine/threonine-protein kinase RPK2 OS=Arabidopsis thaliana GN=RPK2 PE=2 SV=1	ats:109762650/5.7e-126/LOC109762650; probable LRR receptor-like serine/threonine-protein kinase RPK1; K04733 interleukin-1 receptor-associated kinase 4 [EC:2.7.11.1]	At3g02130/3.2e-244/[T] LSE0002 A Receptor protein kinase containing LRR repeats	PF13855/4.9E-7/Leucine rich repeat	cellular_component:GO:0016021//integral component of membrane;molecular_function:GO:0004674//protein serine/threonine kinase activity;GO:0005524//ATP binding;
CL10078.Contig2_All	4037	5.96	7.3	6.44	2.52	2.66	3.11	446.153	198.881	-1.16563	2.34347e-20	Down	XP_006468910.1/0.0e+00/PREDICTED: LRR receptor-like serine/threonine-protein kinase RPK2 [Citrus sinensis] >XP_006468911.1 PREDICTED: LRR receptor-like serine/threonine-protein kinase RPK2 [Citrus sinensis]	XM_006468848.2/0.0/PREDICTED: Citrus sinensis LRR receptor-like serine/threonine-protein kinase RPK2 (LOC102627319), transcript variant X2, mRNA	sp|Q9S7I6|RPK2_ARATH/1.8e-244/LRR receptor-like serine/threonine-protein kinase RPK2 OS=Arabidopsis thaliana GN=RPK2 PE=2 SV=1	ats:109762650/5.8e-126/LOC109762650; probable LRR receptor-like serine/threonine-protein kinase RPK1; K04733 interleukin-1 receptor-associated kinase 4 [EC:2.7.11.1]	At3g02130/4.3e-244/[T] LSE0002 A Receptor protein kinase containing LRR repeats	PS00107/-/Protein kinases ATP-binding region signature.	cellular_component:GO:0016021//integral component of membrane;molecular_function:GO:0004674//protein serine/threonine kinase activity;GO:0005524//ATP binding;
CL10079.Contig2_All	3826	0.2	0.46	0.46	1.43	1.43	1.61	24.1743	100.343	2.05339	2.8869e-11	Up	KYP47640.1/0.0e+00/Retrovirus-related Pol polyprotein from transposon TNT 1-94, partial [Cajanus cajan]	KT921225.1/0.0/Kandelia candel retrotransposon KCRE1, complete sequence	sp|P10978|POLX_TOBAC/5.7e-280/Retrovirus-related Pol polyprotein from transposon TNT 1-94 OS=Nicotiana tabacum PE=2 SV=1	adu:107466525/4.3e-187/LOW QUALITY PROTEIN: DNA-directed RNA polymerase II subunit 1-like; K03006 DNA-directed RNA polymerase II subunit RPB1 [EC:2.7.7.6]	At2g13930/2.2e-298/[R] KOG0017 FOG: Transposon-encoded proteins with TYA, reverse transcriptase, integrase domains in various combinations	PF07727/9.9E-98/Reverse transcriptase (RNA-dependent DNA polymerase)	NA
CL1008.Contig2_All	667	14.04	10.25	11.19	3.44	3.53	4.14	119.113	39.4986	-1.59245	1.93445e-10	Down	XP_008225807.1/1.3e-09/PREDICTED: uncharacterized protein LOC103325427 [Prunus mume]	NA	sp|Q9FFW5|PERK8_ARATH/8.5e-06/Proline-rich receptor-like protein kinase PERK8 OS=Arabidopsis thaliana GN=PERK8 PE=1 SV=1	NA	Hs4505285/1.2e-07/[WV] KOG1216 von Willebrand factor and related coagulation proteins	NA	NA
CL10084.Contig1_All	686	7.24	6.29	9.12	25.89	27.93	26.67	79.7157	295.67	1.89105	1.50707e-32	Up	XP_010688207.2/5.4e-11/PREDICTED: uncharacterized protein LOC104902207 [Beta vulgaris subsp. vulgaris]	NA	sp|Q9LK03|PERK2_ARATH/6.1e-07/Proline-rich receptor-like protein kinase PERK2 OS=Arabidopsis thaliana GN=PERK2 PE=2 SV=3	osa:4336295/1.7e-06/peroxidase 18; K00430 peroxidase [EC:1.11.1.7]	Hs4505285/5.2e-09/[WV] KOG1216 von Willebrand factor and related coagulation proteins	NA	NA
CL10084.Contig2_All	730	12.23	12.68	9.81	38.95	41.18	39.45	130.715	471.327	1.85031	2.89951e-52	Up	XP_010688207.2/1.9e-09/PREDICTED: uncharacterized protein LOC104902207 [Beta vulgaris subsp. vulgaris]	NA	sp|Q9LK03|PERK2_ARATH/2.5e-06/Proline-rich receptor-like protein kinase PERK2 OS=Arabidopsis thaliana GN=PERK2 PE=2 SV=3	NA	Hs4505285/1.1e-09/[WV] KOG1216 von Willebrand factor and related coagulation proteins	NA	NA
CL10085.Contig1_All	807	14.87	13.8	12.36	4.16	5.46	6.16	171.14	69.6062	-1.29789	1.91774e-10	Down	OMO56194.1/2.0e-76/Ribosomal protein S13 [Corchorus olitorius]	XM_006472650.2/0.0/PREDICTED: Citrus sinensis 30S ribosomal protein S13, chloroplastic (LOC102612251), mRNA	sp|P42732|RR13_ARATH/6.3e-72/30S ribosomal protein S13, chloroplastic OS=Arabidopsis thaliana GN=RPS13 PE=2 SV=1	tcc:18592264/8.4e-77/30S ribosomal protein S13, chloroplastic; K02952 small subunit ribosomal protein S13	At5g14320/7.1e-66/[J] KOG3311 Ribosomal protein S18	PTHR10871/3.4E-70/--	biological_process:GO:0042254//ribosome biogenesis;GO:0006412//translation;cellular_component:GO:0005840//ribosome;GO:0015935//small ribosomal subunit;molecular_function:GO:0003723//RNA binding;GO:0003735//structural constituent of ribosome;
CL10085.Contig2_All	877	13.31	13.41	12.65	5.03	5.36	4.55	179.649	72.2761	-1.31359	4.30028e-14	Down	OMO56194.1/2.1e-76/Ribosomal protein S13 [Corchorus olitorius]	XM_006472650.2/0.0/PREDICTED: Citrus sinensis 30S ribosomal protein S13, chloroplastic (LOC102612251), mRNA	sp|P42732|RR13_ARATH/6.9e-72/30S ribosomal protein S13, chloroplastic OS=Arabidopsis thaliana GN=RPS13 PE=2 SV=1	tcc:18592264/9.1e-77/30S ribosomal protein S13, chloroplastic; K02952 small subunit ribosomal protein S13	At5g14320/7.7e-66/[J] KOG3311 Ribosomal protein S18	PTHR10871/3.4E-70/--	biological_process:GO:0042254//ribosome biogenesis;GO:0006412//translation;cellular_component:GO:0015935//small ribosomal subunit;molecular_function:GO:0003723//RNA binding;GO:0003735//structural constituent of ribosome;
CL10087.Contig2_All	575	1.92	2.97	3.51	1.22	0.54	1.19	22.9752	8.56736	-1.42315	0.0171658	Down	OMO69679.1/1.2e-22/Acyl carrier protein (ACP) [Corchorus capsularis]	NA	sp|P53665|ACPM1_ARATH/3.3e-22/Acyl carrier protein 1, mitochondrial OS=Arabidopsis thaliana GN=MTACP1 PE=1 SV=1	csat:104787517/1.9e-22/acyl carrier protein 2, mitochondrial-like; K03955 NADH dehydrogenase (ubiquinone) 1 alpha/beta subcomplex 1	YKL192c/4.5e-22/[CIQ] KOG1748 Acyl carrier protein/NADH-ubiquinone oxidoreductase, NDUFAB1/SDAP subunit	PTHR20863/3.5E-58/--	biological_process:GO:0006633//fatty acid biosynthetic process;
CL10089.Contig2_All	702	1.7	2.22	1.72	4.43	3.8	3.96	20.5951	45.6922	1.14964	0.00166098	Up	OSX75950.1/9.7e-24/hypothetical protein BU14_0215s0011 [Porphyra umbilicalis]	NA	sp|Q9SMI2|RS21_CYAPA/6.2e-23/40S ribosomal protein S21 OS=Cyanophora paradoxa GN=RPS21 PE=3 SV=1	zma:103630203/7.9e-23/40S ribosomal protein S21-like isoform X1; K02971 small subunit ribosomal protein S21e	YKR057w/3.0e-28/[J] KOG3486 40S ribosomal protein S21	NA	NA
CL10090.Contig2_All	502	2.06	1.96	1.2	0.27	0	0.26	11.9001	1.97408	-2.59173	0.00162293	Down	XP_019233583.1/4.4e-18/PREDICTED: 60S ribosomal protein L28-1-like [Nicotiana attenuata] >OIT27285.1 60s ribosomal protein l28-1 [Nicotiana attenuata]	NA	sp|Q9M0E2|RL282_ARATH/7.3e-18/60S ribosomal protein L28-2 OS=Arabidopsis thaliana GN=RPL28C PE=2 SV=1	nto:104107578/6.5e-19/60S ribosomal protein L28-1-like; K02903 large subunit ribosomal protein L28e	7292335/9.7e-21/[J] KOG3412 60S ribosomal protein L28	PF01778/7.5E-31/Ribosomal L28e protein family	biological_process:GO:0006412//translation;cellular_component:GO:0005840//ribosome;GO:0022625//cytosolic large ribosomal subunit;molecular_function:GO:0003735//structural constituent of ribosome;
CL10091.Contig5_All	1408	4.06	2.67	2.97	1.27	1.95	0.88	72.7631	32.8473	-1.14743	0.00255445	Down	KDO58388.1/7.3e-95/hypothetical protein CISIN_1g047451mg, partial [Citrus sinensis]	NA	sp|Q9MA83|RLP30_ARATH/2.9e-40/Receptor like protein 30 OS=Arabidopsis thaliana GN=RLP30 PE=2 SV=1	gra:105793062/1.3e-45/receptor-like protein 12; K13023 carboxypeptidase N regulatory subunit	At1g47890/7.8e-60/[R] KOG0619 FOG: Leucine rich repeat	PTHR27004:SF3/6.5E-109/--	NA
CL10094.Contig2_All	2471	4.3	5.06	4.7	1.48	1.58	1.53	192.391	66.6041	-1.53036	3.13238e-18	Down	XP_006464531.1/1.7e-200/PREDICTED: indole-3-pyruvate monooxygenase YUCCA6-like [Citrus sinensis] >XP_006476149.1 PREDICTED: indole-3-pyruvate monooxygenase YUCCA6-like [Citrus sinensis]	XM_021741215.1/0.0/PREDICTED: Manihot esculenta indole-3-pyruvate monooxygenase YUCCA6-like (LOC110603477), mRNA	sp|Q8VZ59|YUC6_ARATH/7.9e-166/Indole-3-pyruvate monooxygenase YUCCA6 OS=Arabidopsis thaliana GN=YUC6 PE=1 SV=1	jcu:105638278/1.3e-197/indole-3-pyruvate monooxygenase YUCCA6; K11816 indole-3-pyruvate monooxygenase [EC:1.14.13.168]	At5g25620/7.1e-165/[Q] KOG1399 Flavin-containing monooxygenase	PR00469/1.7E-8/Pyridine nucleotide disulphide reductase class-II signature	molecular_function:GO:0050661//NADP binding;GO:0004499//N,N-dimethylaniline monooxygenase activity;GO:0050660//flavin adenine dinucleotide binding;
CL10098.Contig2_All	782	0.24	0.47	0.64	1.92	1.49	1.48	5.97354	20.3483	1.76825	0.00313344	Up	NA	XM_006485584.2/0.0/PREDICTED: Citrus sinensis adenosine kinase 2 (LOC102607566), mRNA	NA	NA	NA	NA	NA
CL10101.Contig2_All	969	2.13	1.43	1.33	0.25	0.19	0.06	24.4	3.38765	-2.84852	7.65609e-06	Down	ACE96881.1/1.0e-18/putative protein, partial [Populus tremula] >ACE96882.1 putative protein, partial [Populus tremula] >ACE96883.1 putative protein, partial [Populus tremula] >ACE96884.1 putative protein, partial [Populus tremula] >ACE96885.1 putative protein, partial [Populus tremula] >ACE96886.1 putative protein, partial [Populus tremula] >ACE96887.1 putative protein, partial [Populus tremula] …	NA	NA	gra:105780599/2.2e-07/peptidyl-prolyl cis-trans isomerase CYP95-like; K09566 peptidyl-prolyl isomerase G (cyclophilin G) [EC:5.2.1.8]	Hs19923466/2.6e-14/[A] KOG1869 Splicing coactivator SRm160/300, subunit SRm300	PTHR32487:SF0/1.7E-96/--	NA
CL10103.Contig2_All	627	0	0	0.31	1.15	1.18	1.3	1.62225	11.1007	2.77458	0.00133096	Up	NA	NA	NA	NA	NA	PTHR33572:SF4/3.7E-13/--	NA
CL10104.Contig1_All	2091	2.15	2.22	1.92	20.23	21.72	21.66	73.0052	774.679	3.40753	1.57464e-171	Up	XP_021973178.1/0.0e+00/extensin-2-like [Helianthus annuus]	XM_016885467.1/0.0/PREDICTED: Gossypium hirsutum extensin-2-like (LOC107950556), mRNA	sp|Q9M1G9|EXTN2_ARATH/1.5e-186/Extensin-2 OS=Arabidopsis thaliana GN=EXT2 PE=2 SV=1	spen:107018969/3.5e-151/extensin-2-like; K03006 DNA-directed RNA polymerase II subunit RPB1 [EC:2.7.7.6]	At1g23720/8.2e-199/[M] LSE0120 A Extensin and related proteins	NA	NA
CL10104.Contig2_All	292	1.55	2.04	2.11	11.55	12.32	9.78	7.67178	43.088	2.48965	1.3684e-08	Up	XP_019155333.1/9.0e-24/PREDICTED: extensin-2-like [Ipomoea nil]	XM_019317003.1/0.0/PREDICTED: Ipomoea nil extensin-2-like (LOC109167927), transcript variant X2, mRNA	sp|P06599|EXTN_DAUCA/1.2e-17/Extensin OS=Daucus carota PE=2 SV=1	sind:105163612/4.6e-17/extensin-2-like; K05747 Wiskott-Aldrich syndrome protein	At2g43150/5.8e-18/[M] LSE0120 A Extensin and related proteins	NA	NA
CL10104.Contig6_All	1736	33.93	36.59	37.45	82.03	80.07	71.15	1027.62	2341.81	1.18832	1.95091e-77	Up	XP_019155333.1/9.5e-254/PREDICTED: extensin-2-like [Ipomoea nil]	XM_004497353.2/0.0/PREDICTED: Cicer arietinum extensin-2 (LOC101500219), mRNA	sp|Q9M1G9|EXTN2_ARATH/6.6e-151/Extensin-2 OS=Arabidopsis thaliana GN=EXT2 PE=2 SV=1	spen:107018969/2.9e-127/extensin-2-like; K03006 DNA-directed RNA polymerase II subunit RPB1 [EC:2.7.7.6]	At1g23720/3.2e-156/[M] LSE0120 A Extensin and related proteins	PR01217/7.2E-18/Proline rich extensin signature	NA
CL1011.Contig1_All	2275	8.89	9.33	9.21	3.76	4.58	4.3	344.907	168.204	-1.03599	2.44312e-17	Down	XP_006466417.1/5.6e-254/PREDICTED: GTP-binding protein At3g49725, chloroplastic [Citrus sinensis]	XM_006426084.1/0.0/Citrus clementina hypothetical protein (CICLE_v10025205mg) mRNA, complete cds	sp|Q0WTB4|Y3725_ARATH/3.4e-179/GTP-binding protein At3g49725, chloroplastic OS=Arabidopsis thaliana GN=At3g49725 PE=2 SV=2	gsl:Gasu_16470/2.0e-43/GTP-binding protein HflX; K03665 GTPase	At3g49730_2/1.1e-135/[R] KOG0410 Predicted GTP binding protein	PTHR10229/1.0E-171/--	molecular_function:GO:0005525//GTP binding;
CL10119.Contig1_All	1844	0.32	0.54	0.45	3.8	4.21	4.1	13.8583	128.921	3.21766	3.1412e-28	Up	NP_001275831.1/3.3e-228/1-aminocyclopropane-1-carboxylate synthase-like [Citrus sinensis] >XP_006439472.1 hypothetical protein CICLE_v10019920mg [Citrus clementina] >CAB60721.1 ACC synthase [Citrus sinensis] >CAB60722.1 ACC synthase [Citrus sinensis] >ESR52712.1 hypothetical protein CICLE_v10019920mg [Citrus clementina]	AJ276295.1/0.0/Citrus sinensis partial mRNA for ACC synthase (acs2 gene)	sp|P31531|1A1C_SOYBN/5.8e-206/1-aminocyclopropane-1-carboxylate synthase OS=Glycine max GN=ACS1 PE=2 SV=1	cit:102614629/4.8e-229/acs1, acs2; 1-aminocyclopropane-1-carboxylate synthase-like; K20772 1-aminocyclopropane-1-carboxylate synthase 1/2/6 [EC:4.4.1.14]	NA	PTHR11751:SF380/2.2E-290/--	biological_process:GO:0009058//biosynthetic process;molecular_function:GO:0003824//catalytic activity;GO:0030170//pyridoxal phosphate binding;
CL10119.Contig2_All	605	0.21	0.11	0.32	1.07	1.46	1.36	2.47509	11.8732	2.26215	0.00352122	Up	BAA94599.1/1.4e-66/1-aminocyclopropane-1-carboxylate synthase [Populus euphratica]	XM_021812715.1/0.0/PREDICTED: Hevea brasiliensis 1-aminocyclopropane-1-carboxylate synthase-like (LOC110656120), mRNA	sp|P31531|1A1C_SOYBN/2.4e-63/1-aminocyclopropane-1-carboxylate synthase OS=Glycine max GN=ACS1 PE=2 SV=1	cit:102614629/2.2e-66/acs1, acs2; 1-aminocyclopropane-1-carboxylate synthase-like; K20772 1-aminocyclopropane-1-carboxylate synthase 1/2/6 [EC:4.4.1.14]	NA	PTHR11751/1.8E-83/--	biological_process:GO:0009058//biosynthetic process;molecular_function:GO:0003824//catalytic activity;GO:0030170//pyridoxal phosphate binding;
CL1012.Contig1_All	418	4.24	3.7	4.48	33.48	26.91	24.34	24.2222	173.187	2.83793	6.05297e-30	Up	XP_006451139.1/1.8e-17/hypothetical protein CICLE_v10010340mg [Citrus clementina] >ESR64379.1 hypothetical protein CICLE_v10010340mg [Citrus clementina] >KDO50879.1 hypothetical protein CISIN_1g036245mg [Citrus sinensis]	NA	sp|O82337|AGP16_ARATH/6.7e-09/Arabinogalactan peptide 16 OS=Arabidopsis thaliana GN=AGP16 PE=1 SV=1	NA	NA	PTHR33374/2.6E-26/--	cellular_component:GO:0016021//integral component of membrane;
CL1012.Contig2_All	382	0.38	0.4	0.39	4.45	3.61	2.3	2.58461	17.8716	2.78966	8.48794e-05	Up	XP_006451139.1/7.6e-07/hypothetical protein CICLE_v10010340mg [Citrus clementina] >ESR64379.1 hypothetical protein CICLE_v10010340mg [Citrus clementina] >KDO50879.1 hypothetical protein CISIN_1g036245mg [Citrus sinensis]	NA	NA	NA	NA	NA	cellular_component:GO:0016021//integral component of membrane;
CL10120.Contig1_All	1262	10.65	10.9	10.55	29.84	32.4	33.37	218.735	685.154	1.64724	9.75581e-70	Up	XP_006435156.1/4.4e-115/hypothetical protein CICLE_v10002383mg [Citrus clementina] >ESR48396.1 hypothetical protein CICLE_v10002383mg [Citrus clementina]	XM_021826848.1/0.0/PREDICTED: Hevea brasiliensis cytokinin riboside 5&apos;-monophosphate phosphoribohydrolase LOG1-like (LOC110666370), mRNA	sp|Q8L8B8|LOG3_ARATH/3.5e-93/Cytokinin riboside 5'-monophosphate phosphoribohydrolase LOG3 OS=Arabidopsis thaliana GN=LOG3 PE=1 SV=1	cit:102623540/6.5e-116/cytokinin riboside 5'-monophosphate phosphoribohydrolase LOG1-like; K06966 uncharacterized protein	At5g06300/2.0e-91/[RE] TWOG0190 Predicted lysine decarboxylase	PF03641/3.5E-45/Possible lysine decarboxylase	biological_process:GO:0009691//cytokinin biosynthetic process;molecular_function:GO:0016787//hydrolase activity;
CL10121.Contig13_All	4579	0.16	0	0.24	0	0	0	8.97419	1.04766	-3.09861	0.00377794	Down	XP_006421373.1/6.2e-260/hypothetical protein CICLE_v10004284mg [Citrus clementina] >ESR34613.1 hypothetical protein CICLE_v10004284mg [Citrus clementina]	XM_021766742.1/0.0/PREDICTED: Manihot esculenta protein N-terminal glutamine amidohydrolase (LOC110622281), transcript variant X1, mRNA	sp|Q7XBQ9|RGA2_SOLBU/5.7e-125/Disease resistance protein RGA2 OS=Solanum bulbocastanum GN=RGA2 PE=1 SV=1	hbr:110659116/3.7e-145/putative disease resistance protein RGA3 isoform X1; K15078 structure-specific endonuclease subunit SLX1 [EC:3.6.1.-]	NA	PTHR23155/0.0/--	biological_process:GO:0006952//defense response;molecular_function:GO:0043531//ADP binding;
CL10123.Contig1_All	3943	143.16	137.14	137.75	45.05	43.43	44.08	9270.81	3105.35	-1.57794	0	Down	XP_021295389.1/1.4e-199/sedoheptulose-1,7-bisphosphatase, chloroplastic [Herrania umbratica]	XM_021439714.1/0.0/PREDICTED: Herrania umbratica sedoheptulose-1,7-bisphosphatase, chloroplastic (LOC110424981), mRNA	sp|P46283|S17P_ARATH/3.9e-183/Sedoheptulose-1,7-bisphosphatase, chloroplastic OS=Arabidopsis thaliana GN=At3g55800 PE=2 SV=1	vvi:100260169/7.7e-200/sedoheptulose-1,7-bisphosphatase, chloroplastic; K01100 sedoheptulose-bisphosphatase [EC:3.1.3.37]	At3g55800/9.2e-183/[G] KOG1458 Fructose-1,6-bisphosphatase	PR01958/1.4E-73/Sedoheptulose-1,7-bisphosphatase family signature	biological_process:GO:0005986//sucrose biosynthetic process;GO:0006002//fructose 6-phosphate metabolic process;GO:0006094//gluconeogenesis;GO:0006000//fructose metabolic process;GO:0030388//fructose 1,6-bisphosphate metabolic process;cellular_component:GO:0005737//cytoplasm;molecular_function:GO:0042132//fructose 1,6-bisphosphate 1-phosphatase activity;
CL10125.Contig1_All	3109	3.52	3.1	3.23	1.13	1.19	1.08	170.342	62.2381	-1.45256	3.49453e-15	Down	OLQ09981.1/1.4e-45/Trophinin [Symbiodinium microadriaticum]	NA	sp|Q9LK03|PERK2_ARATH/1.0e-08/Proline-rich receptor-like protein kinase PERK2 OS=Arabidopsis thaliana GN=PERK2 PE=2 SV=3	bdi:100835393/2.3e-13/nuclear pore complex protein NUP62; K14306 nuclear pore complex protein Nup62	Hs4505285/4.1e-37/[WV] KOG1216 von Willebrand factor and related coagulation proteins	PF07940/1.5E-9/Heparinase II/III-like protein	biological_process:GO:0016539//intein-mediated protein splicing;cellular_component:GO:0016021//integral component of membrane;molecular_function:GO:0004252//serine-type endopeptidase activity;GO:0008233//peptidase activity;
CL1013.Contig2_All	1523	4.18	3.67	3.53	24.68	24.88	25.39	94.8083	654.711	2.78777	1.1658e-130	Up	XP_006422266.1/6.3e-185/hypothetical protein CICLE_v10005042mg [Citrus clementina] >ESR35506.1 hypothetical protein CICLE_v10005042mg [Citrus clementina] >KDO61577.1 hypothetical protein CISIN_1g035690mg [Citrus sinensis]	XM_016612795.1/0.0/PREDICTED: Nicotiana tabacum metal tolerance protein 10-like (LOC107790832), mRNA	sp|Q9SAJ7|MTP9_ARATH/1.2e-161/Metal tolerance protein 9 OS=Arabidopsis thaliana GN=MTP9 PE=3 SV=2	NA	At1g79520/2.9e-161/[P] KOG1485 Mitochondrial Fe2+ transporter MMT1 and related transporters (cation diffusion facilitator superfamily)	PF01545/5.2E-32/Cation efflux family	cellular_component:GO:0016021//integral component of membrane;molecular_function:GO:0008324//cation transmembrane transporter activity;
CL1013.Contig3_All	1507	10.72	11.46	10.76	25.14	25.55	26.46	270.054	666.974	1.30438	1.05213e-52	Up	XP_006422266.1/8.4e-174/hypothetical protein CICLE_v10005042mg [Citrus clementina] >ESR35506.1 hypothetical protein CICLE_v10005042mg [Citrus clementina] >KDO61577.1 hypothetical protein CISIN_1g035690mg [Citrus sinensis]	XM_016612795.1/0.0/PREDICTED: Nicotiana tabacum metal tolerance protein 10-like (LOC107790832), mRNA	sp|Q9SAJ7|MTP9_ARATH/1.7e-158/Metal tolerance protein 9 OS=Arabidopsis thaliana GN=MTP9 PE=3 SV=2	NA	At1g79520/3.9e-158/[P] KOG1485 Mitochondrial Fe2+ transporter MMT1 and related transporters (cation diffusion facilitator superfamily)	PF01545/3.7E-33/Cation efflux family	cellular_component:GO:0016021//integral component of membrane;molecular_function:GO:0008324//cation transmembrane transporter activity;
CL10133.Contig1_All	1893	0.77	0.83	0.84	2.05	2.03	2.24	25.7974	69.1169	1.42181	1.03161e-06	Up	NA	XM_017783149.1/0.0/PREDICTED: Gossypium arboreum probable NAD(P)H dehydrogenase (quinone) FQR1-like 1 (LOC108480237), mRNA	NA	NA	NA	NA	NA
CL10133.Contig2_All	1891	0.62	0.37	0.78	2.21	1.76	2.36	18.9721	68.9358	1.86137	1.0784e-07	Up	NA	XM_017783149.1/0.0/PREDICTED: Gossypium arboreum probable NAD(P)H dehydrogenase (quinone) FQR1-like 1 (LOC108480237), mRNA	NA	NA	NA	NA	NA
CL10135.Contig1_All	1735	27.46	28.74	27.83	9.19	8.55	9.1	798.797	269.836	-1.56575	6.18023e-83	Down	KDO38737.1/5.2e-119/hypothetical protein CISIN_1g020905mg [Citrus sinensis]	KR084359.1/0.0/Eurycoma longifolia microsatellite EloT044 sequence	sp|P19954|PRSP1_SPIOL/1.5e-91/Ribosome-binding factor PSRP1, chloroplastic OS=Spinacia oleracea GN=PSRP1 PE=1 SV=2	NA	NA	PF02482/7.9E-23/Sigma 54 modulation protein / S30EA ribosomal protein	biological_process:GO:0044238//primary metabolic process;
CL10135.Contig2_All	1531	19.32	18.7	20.89	6.64	6.07	6.38	490.973	168.448	-1.54334	1.19418e-45	Down	KDO38737.1/4.6e-119/hypothetical protein CISIN_1g020905mg [Citrus sinensis]	KR084359.1/0.0/Eurycoma longifolia microsatellite EloT044 sequence	sp|P19954|PRSP1_SPIOL/1.4e-91/Ribosome-binding factor PSRP1, chloroplastic OS=Spinacia oleracea GN=PSRP1 PE=1 SV=2	NA	NA	PF02482/7.9E-23/Sigma 54 modulation protein / S30EA ribosomal protein	biological_process:GO:0044238//primary metabolic process;
CL10139.Contig3_All	1983	1.22	2.38	2.22	3.9	5.14	4.45	63.6762	154.338	1.27727	1.57533e-06	Up	XP_006484935.1/7.1e-229/PREDICTED: aspartic proteinase-like protein 2 [Citrus sinensis]	XM_006484872.2/0.0/PREDICTED: Citrus sinensis aspartic proteinase-like protein 2 (LOC102629407), mRNA	sp|Q9S9K4|ASPL2_ARATH/2.9e-78/Aspartic proteinase-like protein 2 OS=Arabidopsis thaliana GN=At1g65240 PE=1 SV=2	zju:107410608/4.3e-207/aspartic proteinase-like protein 2; K00924 kinase [EC:2.7.1.-]	At5g22850/1.9e-197/[O] KOG1339 Aspartyl protease	PTHR13683/1.7E-244/--	molecular_function:GO:0004190//aspartic-type endopeptidase activity;
CL1014.Contig2_All	551	3.19	3.92	3.76	1.83	1.29	1.26	28.8891	12.4768	-1.21128	0.0112558	Down	BAK01039.1/5.3e-33/predicted protein [Hordeum vulgare subsp. vulgare]	NA	sp|P41098|RL34_TOBAC/8.8e-25/60S ribosomal protein L34 OS=Nicotiana tabacum GN=RPL34 PE=2 SV=1	gsl:Gasu_19110/1.3e-28/60S ribosomal protein L34e; K02915 large subunit ribosomal protein L34e	YER056c-a/3.5e-40/[J] KOG1790 60s ribosomal protein L34	NA	biological_process:GO:0006412//translation;cellular_component:GO:0005840//ribosome;molecular_function:GO:0003735//structural constituent of ribosome;
CL1014.Contig3_All	549	4.11	3.62	4.34	1.35	1.31	1.67	31.7713	12.4834	-1.34772	0.0026335	Down	BAK01039.1/1.2e-32/predicted protein [Hordeum vulgare subsp. vulgare]	NA	sp|P41098|RL34_TOBAC/8.8e-25/60S ribosomal protein L34 OS=Nicotiana tabacum GN=RPL34 PE=2 SV=1	gsl:Gasu_19110/1.3e-28/60S ribosomal protein L34e; K02915 large subunit ribosomal protein L34e	YER056c-a/3.5e-40/[J] KOG1790 60s ribosomal protein L34	NA	biological_process:GO:0006412//translation;cellular_component:GO:0005840//ribosome;molecular_function:GO:0003735//structural constituent of ribosome;
CL1014.Contig4_All	411	4.01	2.95	3.83	1.65	1.58	1.24	19.9196	8.76134	-1.18497	0.0430506	Down	BAK01039.1/8.7e-33/predicted protein [Hordeum vulgare subsp. vulgare]	NA	sp|P41098|RL34_TOBAC/6.6e-25/60S ribosomal protein L34 OS=Nicotiana tabacum GN=RPL34 PE=2 SV=1	gsl:Gasu_19110/9.6e-29/60S ribosomal protein L34e; K02915 large subunit ribosomal protein L34e	YER056c-a/2.6e-40/[J] KOG1790 60s ribosomal protein L34	PF01199/5.9E-44/Ribosomal protein L34e	biological_process:GO:0006412//translation;cellular_component:GO:0005840//ribosome;molecular_function:GO:0003735//structural constituent of ribosome;
CL10140.Contig2_All	503	0.96	1.07	2.66	0	0.51	0	10.4999	1.78023	-2.56024	0.00646868	Down	NA	JF926150.1/0.0/Litchi chinensis cultivar Feizixiao catalase mRNA, partial cds	NA	NA	NA	NA	NA
CL10142.Contig1_All	1526	0.81	0.66	0.67	1.45	1.84	1.71	18.0624	43.2559	1.25991	0.000920242	Up	NA	CP019112.1/0.0/Spirodela polyrhiza strain 9509 chromosome 20 sequence	NA	NA	NA	NA	NA
CL10146.Contig1_All	853	4.03	2.94	2.92	12.96	13.44	14.81	44.6527	192.805	2.11032	1.10591e-25	Up	XP_006441210.1/1.4e-48/hypothetical protein CICLE_v10022912mg [Citrus clementina] >ESR54450.1 hypothetical protein CICLE_v10022912mg [Citrus clementina] >KDO44254.1 hypothetical protein CISIN_1g035928mg [Citrus sinensis]	XM_018966776.1/0.0/PREDICTED: Juglans regia auxin-responsive protein SAUR32-like (LOC108992269), mRNA	sp|Q9ZUZ3|SAU32_ARATH/2.2e-30/Auxin-responsive protein SAUR32 OS=Arabidopsis thaliana GN=SAUR32 PE=2 SV=1	cit:102629828/4.6e-49/auxin-responsive protein SAUR32; K14488 SAUR family protein	At4g00880/4.6e-31/[RT] LSE0432 A Auxin responsive protein	PF02519/1.2E-22/Auxin responsive protein	biological_process:GO:0009733//response to auxin;
CL10146.Contig2_All	1084	2.39	2.6	2.75	11.22	9.7	8.29	45.3103	177.308	1.96835	1.17663e-20	Up	XP_006441210.1/1.8e-48/hypothetical protein CICLE_v10022912mg [Citrus clementina] >ESR54450.1 hypothetical protein CICLE_v10022912mg [Citrus clementina] >KDO44254.1 hypothetical protein CISIN_1g035928mg [Citrus sinensis]	XM_018966776.1/0.0/PREDICTED: Juglans regia auxin-responsive protein SAUR32-like (LOC108992269), mRNA	sp|Q9ZUZ3|SAU32_ARATH/2.8e-30/Auxin-responsive protein SAUR32 OS=Arabidopsis thaliana GN=SAUR32 PE=2 SV=1	cit:102629828/5.8e-49/auxin-responsive protein SAUR32; K14488 SAUR family protein	At4g00880/5.8e-31/[RT] LSE0432 A Auxin responsive protein	PF02519/1.1E-22/Auxin responsive protein	biological_process:GO:0009733//response to auxin;
CL10150.Contig1_All	839	0.37	0.44	0.45	1.41	1.81	2.31	6.01349	24.9305	2.05164	0.000195591	Up	NA	NA	NA	NA	NA	NA	NA
CL10150.Contig2_All	2391	38.14	38.7	39.32	77.53	78.37	77.11	1541.33	3264.51	1.08269	1.98047e-186	Up	XP_021289246.1/9.7e-241/sulfoquinovosyl transferase SQD2 [Herrania umbratica]	XM_006480910.2/0.0/PREDICTED: Citrus sinensis sulfoquinovosyl transferase SQD2 (LOC102615235), mRNA	sp|Q8S4F6|SQD2_ARATH/9.5e-217/Sulfoquinovosyl transferase SQD2 OS=Arabidopsis thaliana GN=SQD2 PE=1 SV=1	tcc:18597586/9.3e-241/sulfoquinovosyl transferase SQD2; K06119 sulfoquinovosyltransferase [EC:2.4.1.-]	At5g01220/9.2e-186/[MOI] KOG1111 N-acetylglucosaminyltransferase complex, subunit PIG-A/SPT14, required for phosphatidylinositol biosynthesis/Sulfolipid synthase	PF00534/5.5E-27/Glycosyl transferases group 1	NA
CL10151.Contig26_All	3625	0	0.17	0.2	0	0	0	6.18015	0.885513	-2.80306	0.0112608	Down	XP_015380992.1/1.9e-14/PREDICTED: putative disease resistance protein At3g14460 [Citrus sinensis]	NA	NA	vvi:109121561/6.2e-10/putative disease resistance protein At3g14460; K19613 leucine-rich repeat protein SHOC2	NA	NA	biological_process:GO:0006952//defense response;molecular_function:GO:0043531//ADP binding;
CL10151.Contig42_All	6884	0.36	0.17	0.45	0.09	0.14	0.12	37.0733	14.7254	-1.33207	0.0133123	Down	XP_006494011.1/0.0e+00/PREDICTED: putative disease resistance RPP13-like protein 1 [Citrus sinensis] >XP_015381372.1 PREDICTED: putative disease resistance RPP13-like protein 1 [Citrus sinensis] >XP_015381373.1 PREDICTED: putative disease resistance RPP13-like protein 1 [Citrus sinensis]	XM_015530366.1/0.0/PREDICTED: Citrus sinensis putative disease resistance RPP13-like protein 1 (LOC102611203), transcript variant X2, mRNA	sp|Q7XBQ9|RGA2_SOLBU/1.4e-106/Disease resistance protein RGA2 OS=Solanum bulbocastanum GN=RGA2 PE=1 SV=1	mtr:MTR_0267s0070/1.8e-167/NB-ARC domain disease resistance protein, putative; K12818 ATP-dependent RNA helicase DHX8/PRP22 [EC:3.6.4.13]	NA	PS51450/4.971/Leucine-rich repeat profile.	biological_process:GO:0006952//defense response;molecular_function:GO:0043531//ADP binding;
CL10151.Contig46_All	3573	0.69	1.23	0.44	1.43	1.54	1.73	47.5825	98.2319	1.04576	0.00713963	Up	XP_015380992.1/1.9e-14/PREDICTED: putative disease resistance protein At3g14460 [Citrus sinensis]	NA	NA	vvi:109121561/6.1e-10/putative disease resistance protein At3g14460; K19613 leucine-rich repeat protein SHOC2	NA	NA	biological_process:GO:0006952//defense response;molecular_function:GO:0043531//ADP binding;
CL10152.Contig1_All	1508	5.5	3.97	3.91	0.38	0.44	0.11	108.133	8.31613	-3.70075	1.9285e-20	Down	KDO43504.1/6.0e-95/hypothetical protein CISIN_1g015903mg [Citrus sinensis]	XM_011011313.1/0.0/PREDICTED: Populus euphratica epoxide hydrolase 3 (LOC105114684), transcript variant X2, mRNA	NA	NA	YNR064c/9.1e-14/[I] KOG4178 Soluble epoxide hydrolase	PF00561/6.3E-13/alpha/beta hydrolase fold	molecular_function:GO:0003824//catalytic activity;
CL10154.Contig1_All	589	3.6	3.58	3.43	12.7	11.98	15.61	31.7458	123.987	1.96555	9.23112e-16	Up	NA	NA	NA	NA	NA	NA	NA
CL10156.Contig1_All	2257	2.54	2.34	2.74	6.3	5.64	5.09	95.3051	224.181	1.23404	5.74772e-14	Up	OLQ09981.1/3.0e-34/Trophinin [Symbiodinium microadriaticum]	NA	sp|Q9LF88|Y3304_ARATH/1.2e-06/Late embryogenesis abundant protein At3g53040 OS=Arabidopsis thaliana GN=At3g53040 PE=2 SV=1	ini:109174993/2.2e-18/nuclear pore complex protein NUP62-like; K14306 nuclear pore complex protein Nup62	SPAPB1E7.04c/2.2e-16/[M] KOG4701 Chitinase	NA	NA
CL10158.Contig2_All	3737	3.44	4.26	2.63	1.67	1.31	0.87	215.443	85.8403	-1.32758	5.90702e-07	Down	XP_010061253.1/3.2e-238/PREDICTED: purple acid phosphatase [Eucalyptus grandis] >XP_010061254.1 PREDICTED: purple acid phosphatase [Eucalyptus grandis] >KCW68181.1 hypothetical protein EUGRSUZ_F01849 [Eucalyptus grandis]	XR_370232.2/0.0/PREDICTED: Citrus sinensis purple acid phosphatase 2-like (LOC102607430), transcript variant X3, misc_RNA	sp|Q9SDZ9|PPAF2_IPOBA/1.4e-219/Purple acid phosphatase 2 OS=Ipomoea batatas GN=PAP2 PE=1 SV=1	brp:108871183/1.7e-07/omega-hydroxypalmitate O-feruloyl transferase-like; K15400 omega-hydroxypalmitate O-feruloyl transferase [EC:2.3.1.188]	At2g27190/1.5e-211/[G] KOG1378 Purple acid phosphatase	PTHR10992:SF743/3.2E-160/--	biological_process:GO:0016036//cellular response to phosphate starvation;cellular_component:GO:0009505//plant-type cell wall;GO:0005829//cytosol;molecular_function:GO:0046872//metal ion binding;GO:0003993//acid phosphatase activity;
CL10160.Contig3_All	2086	0.15	0.53	0.6	1.61	1.24	1.75	15.2839	54.607	1.83707	6.34207e-05	Up	XP_021658053.1/1.9e-62/probable prolyl 4-hydroxylase 9 isoform X2 [Hevea brasiliensis]	XM_021971609.1/0.0/PREDICTED: Prunus avium probable prolyl 4-hydroxylase 9 (LOC110767944), mRNA	sp|Q8VZJ7|P4H9_ARATH/4.9e-60/Probable prolyl 4-hydroxylase 9 OS=Arabidopsis thaliana GN=P4H9 PE=2 SV=1	jcu:105650753/7.5e-61/probable prolyl 4-hydroxylase 9; K00472 prolyl 4-hydroxylase [EC:1.14.11.2]	At4g33910/1.5e-43/[E] KOG1591 Prolyl 4-hydroxylase alpha subunit	PTHR10869:SF66/3.8E-72/--	cellular_component:GO:0016021//integral component of membrane;molecular_function:GO:0016705//oxidoreductase activity, acting on paired donors, with incorporation or reduction of molecular oxygen;GO:0005506//iron ion binding;GO:0031418//L-ascorbic acid binding;
CL10160.Contig5_All	2660	0.21	0.13	0.52	1.29	0.86	0.86	13.1086	45.9448	1.80938	0.000449328	Up	XP_021658053.1/6.2e-63/probable prolyl 4-hydroxylase 9 isoform X2 [Hevea brasiliensis]	XM_017790383.1/0.0/PREDICTED: Gossypium arboreum probable prolyl 4-hydroxylase 9 (LOC108486358), mRNA	sp|Q8VZJ7|P4H9_ARATH/7.7e-58/Probable prolyl 4-hydroxylase 9 OS=Arabidopsis thaliana GN=P4H9 PE=2 SV=1	jcu:105650753/1.5e-61/probable prolyl 4-hydroxylase 9; K00472 prolyl 4-hydroxylase [EC:1.14.11.2]	At4g33910/1.8e-41/[E] KOG1591 Prolyl 4-hydroxylase alpha subunit	PTHR10869:SF66/3.8E-72/--	molecular_function:GO:0016705//oxidoreductase activity, acting on paired donors, with incorporation or reduction of molecular oxygen;GO:0005506//iron ion binding;GO:0031418//L-ascorbic acid binding;
CL10160.Contig6_All	1988	1.92	2.16	1.91	5.55	5.84	6.25	65.3783	203.35	1.63709	1.34043e-21	Up	XP_021658053.1/7.5e-130/probable prolyl 4-hydroxylase 9 isoform X2 [Hevea brasiliensis]	XM_021971609.1/0.0/PREDICTED: Prunus avium probable prolyl 4-hydroxylase 9 (LOC110767944), mRNA	sp|Q8VZJ7|P4H9_ARATH/1.1e-125/Probable prolyl 4-hydroxylase 9 OS=Arabidopsis thaliana GN=P4H9 PE=2 SV=1	cit:102615941/6.1e-129/probable prolyl 4-hydroxylase 9; K00472 prolyl 4-hydroxylase [EC:1.14.11.2]	At4g33910/3.4e-93/[E] KOG1591 Prolyl 4-hydroxylase alpha subunit	PS51471/11.205/Fe(2+) 2-oxoglutarate dioxygenase domain profile.	molecular_function:GO:0016705//oxidoreductase activity, acting on paired donors, with incorporation or reduction of molecular oxygen;GO:0005506//iron ion binding;GO:0031418//L-ascorbic acid binding;
CL10160.Contig9_All	1810	0.48	1.07	0.95	1.99	2.19	1.44	24.9742	57.9298	1.21387	0.002892	Up	XP_021658052.1/3.6e-94/probable prolyl 4-hydroxylase 9 isoform X1 [Hevea brasiliensis]	XM_021971609.1/0.0/PREDICTED: Prunus avium probable prolyl 4-hydroxylase 9 (LOC110767944), mRNA	sp|Q8VZJ7|P4H9_ARATH/7.7e-94/Probable prolyl 4-hydroxylase 9 OS=Arabidopsis thaliana GN=P4H9 PE=2 SV=1	hbr:110648206/5.3e-95/probable prolyl 4-hydroxylase 9 isoform X1; K00472 prolyl 4-hydroxylase [EC:1.14.11.2]	At4g33910/2.4e-77/[E] KOG1591 Prolyl 4-hydroxylase alpha subunit	PS51471/11.205/Fe(2+) 2-oxoglutarate dioxygenase domain profile.	molecular_function:GO:0016705//oxidoreductase activity, acting on paired donors, with incorporation or reduction of molecular oxygen;GO:0005506//iron ion binding;GO:0031418//L-ascorbic acid binding;
CL10163.Contig1_All	1525	17.94	17.32	18.36	87.59	92.63	92.64	445.919	2391.21	2.42289	0	Up	EOY06040.1/1.1e-83/Myb domain protein 13, putative [Theobroma cacao]	XM_018119496.1/0.0/PREDICTED: Theobroma cacao myb-related protein Myb4 (LOC18603217), mRNA	sp|Q9LTC4|MYB15_ARATH/8.6e-78/Transcription factor MYB15 OS=Arabidopsis thaliana GN=MYB15 PE=1 SV=1	tcc:18603217/6.0e-84/myb-related protein Myb4; K09422 transcription factor MYB, plant	At3g23250/2.0e-77/[K] KOG0048 Transcription factor, Myb superfamily	SM00717/2.2E-14/SANT SWI3, ADA2, N-CoR and TFIIIB'' DNA-binding domains	NA
CL10164.Contig2_All	1357	2.18	2.23	2.5	0.99	0.62	0.44	49.6477	16.0271	-1.63122	3.54541e-05	Down	XP_006473368.1/2.0e-126/PREDICTED: uroporphyrinogen-III synthase, chloroplastic isoform X4 [Citrus sinensis]	XM_006434771.1/0.0/Citrus clementina hypothetical protein (CICLE_v10001965mg) mRNA, complete cds	sp|O48721|HEM4_ARATH/5.1e-98/Uroporphyrinogen-III synthase, chloroplastic OS=Arabidopsis thaliana GN=UROS PE=2 SV=2	vvi:100250675/1.5e-118/uroporphyrinogen-III synthase, chloroplastic; K01719 uroporphyrinogen-III synthase [EC:4.2.1.75]	NA	PF02602/1.2E-48/Uroporphyrinogen-III synthase HemD	biological_process:GO:0033014//tetrapyrrole biosynthetic process;molecular_function:GO:0004852//uroporphyrinogen-III synthase activity;
CL10173.Contig1_All	1257	17.56	16.09	16.45	38.91	38.99	40.07	339.579	842.074	1.3102	5.89327e-66	Up	XP_006429758.1/3.1e-113/hypothetical protein CICLE_v10012675mg [Citrus clementina] >XP_006429759.1 hypothetical protein CICLE_v10012675mg [Citrus clementina] >XP_006481348.1 PREDICTED: OTU domain-containing protein DDB_G0284757 [Citrus sinensis] >XP_006481349.1 PREDICTED: OTU domain-containing protein DDB_G0284757 [Citrus sinensis] >XP_006481350.1 PREDICTED: OTU domain-containing protein DDB_G028…	XM_006481286.2/0.0/PREDICTED: Citrus sinensis OTU domain-containing protein DDB_G0284757 (LOC102620085), transcript variant X2, mRNA	NA	ota:OT_ostta03g04650/1.5e-40/Ovarian tumour, otubain; K12655 OTU domain-containing protein 5 [EC:3.4.19.12]	At3g02070/6.1e-80/[TO] KOG2605 OTU (ovarian tumor)-like cysteine protease	PTHR12419/6.1E-166/--	NA
CL10185.Contig1_All	911	0	0.3	0.42	7.71	9.53	8.04	4.05278	125.742	4.95541	5.06505e-28	Up	XP_006484466.1/3.9e-57/PREDICTED: uncharacterized protein LOC102612994 [Citrus sinensis]	XM_017361474.1/0.0/PREDICTED: Daucus carota subsp. sativus uncharacterized LOC108194513 (LOC108194513), mRNA	NA	bna:106453259/5.3e-35/uncharacterized protein LOC106453259; K00993 ethanolaminephosphotransferase [EC:2.7.8.1]	At1g13520/7.6e-40/[S] LSE0399 A Uncharacterized protein	PTHR31050/1.3E-95/--	NA
CL10185.Contig3_All	1297	1.56	1.02	1.68	14.57	15.22	15.06	29.976	329.81	3.45976	6.60151e-72	Up	XP_006484466.1/3.6e-88/PREDICTED: uncharacterized protein LOC102612994 [Citrus sinensis]	XM_011465365.1/0.0/PREDICTED: Fragaria vesca subsp. vesca uncharacterized LOC105351356 (LOC105351356), mRNA	NA	bna:106453259/8.8e-44/uncharacterized protein LOC106453259; K00993 ethanolaminephosphotransferase [EC:2.7.8.1]	At1g13520/2.7e-67/[S] LSE0399 A Uncharacterized protein	PTHR31050/1.5E-148/--	NA
CL10185.Contig4_All	1831	0.44	0.43	0.42	50.23	55.02	53.2	13.5352	1681.39	6.9568	2.33491e-204	Up	XP_006484466.1/7.9e-142/PREDICTED: uncharacterized protein LOC102612994 [Citrus sinensis]	XM_011465365.1/0.0/PREDICTED: Fragaria vesca subsp. vesca uncharacterized LOC105351356 (LOC105351356), mRNA	NA	bna:106453259/9.2e-71/uncharacterized protein LOC106453259; K00993 ethanolaminephosphotransferase [EC:2.7.8.1]	At1g13520/1.9e-98/[S] LSE0399 A Uncharacterized protein	PF06880/1.4E-35/Protein of unknown function (DUF1262)	NA
CL10185.Contig5_All	2071	2.04	2.27	1.62	4.62	3.68	4.25	67.9066	150.819	1.15119	3.90913e-08	Up	XP_006484466.1/6.1e-106/PREDICTED: uncharacterized protein LOC102612994 [Citrus sinensis]	XM_021819082.1/0.0/PREDICTED: Hevea brasiliensis uncharacterized LOC110660704 (LOC110660704), transcript variant X2, mRNA	NA	bna:106453259/1.4e-62/uncharacterized protein LOC106453259; K00993 ethanolaminephosphotransferase [EC:2.7.8.1]	At1g13480/1.4e-70/[S] LSE0399 A Uncharacterized protein	PF06880/2.3E-36/Protein of unknown function (DUF1262)	NA
CL10185.Contig6_All	1720	1.45	0.94	0.64	8.88	9.27	8.82	28.7964	267.224	3.21409	4.05274e-47	Up	XP_006484466.1/6.1e-136/PREDICTED: uncharacterized protein LOC102612994 [Citrus sinensis]	XM_011465365.1/0.0/PREDICTED: Fragaria vesca subsp. vesca uncharacterized LOC105351356 (LOC105351356), mRNA	NA	bna:106453259/8.6e-71/uncharacterized protein LOC106453259; K00993 ethanolaminephosphotransferase [EC:2.7.8.1]	At1g13520/2.8e-96/[S] LSE0399 A Uncharacterized protein	PTHR31050/4.9E-221/--	NA
CL10185.Contig7_All	1336	0.09	0.22	0.09	3.14	2.98	2.83	3.64172	67.4633	4.21141	1.75737e-17	Up	XP_006484466.1/7.8e-147/PREDICTED: uncharacterized protein LOC102612994 [Citrus sinensis]	XM_021959470.1/0.0/PREDICTED: Prunus avium uncharacterized LOC110757758 (LOC110757758), mRNA	NA	bna:106453259/1.2e-75/uncharacterized protein LOC106453259; K00993 ethanolaminephosphotransferase [EC:2.7.8.1]	At1g13530/7.3e-100/[S] LSE0399 A Uncharacterized protein	PTHR31050/5.7E-238/--	NA
CL10185.Contig8_All	709	0.61	1.09	1.08	9.87	8.05	8.64	10.3612	100.471	3.27752	9.33893e-22	Up	KDO69955.1/4.4e-40/hypothetical protein CISIN_1g016611mg [Citrus sinensis]	XM_021819082.1/0.0/PREDICTED: Hevea brasiliensis uncharacterized LOC110660704 (LOC110660704), transcript variant X2, mRNA	NA	bna:106453259/2.9e-20/uncharacterized protein LOC106453259; K00993 ethanolaminephosphotransferase [EC:2.7.8.1]	At1g13480/6.8e-28/[S] LSE0399 A Uncharacterized protein	PTHR31050/8.5E-60/--	NA
CL10187.Contig1_All	881	11	9.74	10.02	23.32	22.01	23.12	141.845	331.585	1.22506	5.59452e-23	Up	NP_001151612.1/5.1e-62/40S ribosomal protein S18 [Zea mays] >XP_002463750.1 40S ribosomal protein S18 [Sorghum bicolor] >ACF88479.1 unknown [Zea mays] >ACG24818.1 40S ribosomal protein S18 [Zea mays] >ACG30924.1 40S ribosomal protein S18 [Zea mays] >ACG31938.1 40S ribosomal protein S18 [Zea mays] >ACG43516.1 40S ribosomal protein S18 [Zea mays] >ACR35285.1 unknown [Zea mays] >EER90748.1 hypotheti…	NA	sp|P34788|RS18_ARATH/1.1e-61/40S ribosomal protein S18 OS=Arabidopsis thaliana GN=RPS18A PE=1 SV=1	zma:100285246/7.5e-63/40S ribosomal protein S18; K02964 small subunit ribosomal protein S18e	SPBC16D10.11c/2.8e-63/[J] KOG3311 Ribosomal protein S18	PS00646/-/Ribosomal protein S13 signature.	biological_process:GO:0042254//ribosome biogenesis;GO:0006412//translation;cellular_component:GO:0005840//ribosome;GO:0005829//cytosol;GO:0015935//small ribosomal subunit;molecular_function:GO:0003723//RNA binding;GO:0003735//structural constituent of ribosome;
CL10190.Contig1_All	269	0.87	0	0.59	3.52	2.01	2.25	2.15272	8.22334	1.93356	0.0374273	Up	NA	NA	NA	NA	NA	NA	NA
CL10191.Contig4_All	2539	9.5	8.04	11.67	26.7	25.33	26.18	412.949	1164.83	1.49608	2.34724e-42	Up	XP_006491554.1/0.0e+00/PREDICTED: SNARE-interacting protein KEULE-like [Citrus sinensis]	XM_006486737.2/0.0/PREDICTED: Citrus sinensis SNARE-interacting protein KEULE-like (LOC102621596), transcript variant X1, mRNA	sp|Q9C5X3|KEULE_ARATH/2.8e-312/SNARE-interacting protein KEULE OS=Arabidopsis thaliana GN=KEU PE=1 SV=2	cit:102606722/0.0e+00/SNARE-interacting protein KEULE-like; K15292 syntaxin-binding protein 1	At1g12360/1.0e-299/[U] KOG1300 Vesicle trafficking protein Sec1	PTHR11679/0.0/--	biological_process:GO:0006904//vesicle docking involved in exocytosis;
CL102.Contig1_All	3738	0.76	0.86	1.34	2.05	1.66	2.64	62.1659	139.624	1.16736	5.88953e-05	Up	BAJ98567.1/0.0e+00/predicted protein [Hordeum vulgare subsp. vulgare]	AK119312.1/0.0/Oryza sativa Japonica Group cDNA clone:001-130-G09, full insert sequence	sp|Q8H0V6|AB3F_ARATH/2.1e-40/ABC transporter F family member 3 OS=Arabidopsis thaliana GN=ABCF3 PE=1 SV=1	csl:COCSUDRAFT_47721/3.1e-251/elongation factor EF-3; K03235 elongation factor 3	YNL014w_2/6.3e-258/[EJ] KOG0062 ATPase component of ABC transporters with duplicated ATPase domains/Translation elongation factor EF-3b	PTHR19211:SF5/0.0/--	NA
CL102.Contig2_All	3738	0.54	0.74	0.54	1.53	1.36	1.21	38.3308	90.3528	1.23707	3.52011e-06	Up	BAJ98567.1/0.0e+00/predicted protein [Hordeum vulgare subsp. vulgare]	AK367364.1/0.0/Hordeum vulgare subsp. vulgare mRNA for predicted protein, complete cds, clone: NIASHv2055L14	sp|Q8H0V6|AB3F_ARATH/2.7e-40/ABC transporter F family member 3 OS=Arabidopsis thaliana GN=ABCF3 PE=1 SV=1	csl:COCSUDRAFT_47721/1.8e-174/elongation factor EF-3; K03235 elongation factor 3	YNL014w_2/7.7e-256/[EJ] KOG0062 ATPase component of ABC transporters with duplicated ATPase domains/Translation elongation factor EF-3b	PTHR19211:SF5/0.0/--	NA
CL102.Contig4_All	3747	1.56	1.77	1.46	5.07	4.88	4.97	100.75	330.427	1.71354	5.3244e-37	Up	BAJ98567.1/0.0e+00/predicted protein [Hordeum vulgare subsp. vulgare]	AK367364.1/0.0/Hordeum vulgare subsp. vulgare mRNA for predicted protein, complete cds, clone: NIASHv2055L14	sp|Q8H0V6|AB3F_ARATH/4.7e-37/ABC transporter F family member 3 OS=Arabidopsis thaliana GN=ABCF3 PE=1 SV=1	csl:COCSUDRAFT_47721/1.5e-248/elongation factor EF-3; K03235 elongation factor 3	YNL014w_2/3.5e-256/[EJ] KOG0062 ATPase component of ABC transporters with duplicated ATPase domains/Translation elongation factor EF-3b	PF00005/1.1E-23/ABC transporter	molecular_function:GO:0005524//ATP binding;GO:0003746//translation elongation factor activity;GO:0016887//ATPase activity;
CL102.Contig5_All	3761	3.39	3	3.23	9.49	9.54	9.83	203.343	643.47	1.66196	1.43127e-70	Up	BAJ98567.1/0.0e+00/predicted protein [Hordeum vulgare subsp. vulgare]	AK367364.1/0.0/Hordeum vulgare subsp. vulgare mRNA for predicted protein, complete cds, clone: NIASHv2055L14	sp|Q8H0V6|AB3F_ARATH/4.8e-37/ABC transporter F family member 3 OS=Arabidopsis thaliana GN=ABCF3 PE=1 SV=1	csl:COCSUDRAFT_47721/2.0e-250/elongation factor EF-3; K03235 elongation factor 3	YNL014w_2/3.5e-256/[EJ] KOG0062 ATPase component of ABC transporters with duplicated ATPase domains/Translation elongation factor EF-3b	PS00211/-/ABC transporters family signature.	molecular_function:GO:0005524//ATP binding;GO:0003746//translation elongation factor activity;GO:0016887//ATPase activity;
CL102.Contig7_All	445	0.76	1.35	0.93	2.3	3.45	2.55	6.84024	18.0366	1.39881	0.0249455	Up	BAJ98567.1/7.7e-67/predicted protein [Hordeum vulgare subsp. vulgare]	NA	sp|Q9M1H3|AB4F_ARATH/5.1e-15/ABC transporter F family member 4 OS=Arabidopsis thaliana GN=ABCF4 PE=2 SV=1	cre:CHLREDRAFT_145770/5.4e-33/elongation factor EF-3; K03235 elongation factor 3	YNL014w_2/1.0e-61/[EJ] KOG0062 ATPase component of ABC transporters with duplicated ATPase domains/Translation elongation factor EF-3b	PTHR19211:SF5/7.4E-91/--	NA
CL10202.Contig6_All	2537	79.49	84.01	77.66	33.06	33.42	32.63	3402.34	1476.79	-1.20406	8.71129e-174	Down	XP_006420147.1/1.6e-297/hypothetical protein CICLE_v10004394mg [Citrus clementina] >ESR33387.1 hypothetical protein CICLE_v10004394mg [Citrus clementina]	XM_006420084.1/0.0/Citrus clementina hypothetical protein (CICLE_v10004394mg) mRNA, complete cds	sp|Q0WVN5|CSLG3_ARATH/6.1e-145/Cellulose synthase-like protein G3 OS=Arabidopsis thaliana GN=CSLG3 PE=2 SV=2	sind:105166326/9.6e-119/cellulose synthase A catalytic subunit 7 [UDP-forming]; K10999 cellulose synthase A [EC:2.4.1.12]	At4g24000/8.4e-129/[MG] LSE0129 A Cellulose synthase catalytic subunit	PTHR13301:SF41/0.0/--	biological_process:GO:0030244//cellulose biosynthetic process;GO:0071555//cell wall organization;cellular_component:GO:0016021//integral component of membrane;molecular_function:GO:0016760//cellulose synthase (UDP-forming) activity;
CL10214.Contig1_All	694	4.19	3.79	3.92	0.74	1.45	1.24	41.2934	12.9098	-1.67744	4.90811e-05	Down	BAT06016.1/1.0e-41/Os08g0490900 [Oryza sativa Japonica Group]	AK108119.1/0.0/Oryza sativa Japonica Group cDNA clone:002-139-C08, full insert sequence	sp|P54346|H2B3_CHLRE/6.9e-43/Histone H2B.3 OS=Chlamydomonas reinhardtii PE=1 SV=3	dosa:Os08t0490900-00/1.5e-42/Os08g0490900; Similar to Histone H2B.2.; K11252 histone H2B	HsM4504273/2.9e-44/[B] KOG1744 Histone H2B	NA	cellular_component:GO:0005634//nucleus;GO:0000786//nucleosome;molecular_function:GO:0003677//DNA binding;GO:0046982//protein heterodimerization activity;
CL10217.Contig1_All	651	2.53	1.55	3.36	8.57	6.83	7.48	25.0759	78.756	1.65109	4.41236e-07	Up	NA	NA	NA	NA	NA	NA	NA
CL10230.Contig2_All	1237	3.52	3.46	3.85	8.52	8.61	7.76	72.4042	174.362	1.26794	4.87079e-13	Up	OSX73918.1/1.8e-76/hypothetical protein BU14_0319s0006 [Porphyra umbilicalis]	NA	sp|Q9LXC9|IPYR6_ARATH/6.8e-57/Soluble inorganic pyrophosphatase 6, chloroplastic OS=Arabidopsis thaliana GN=PPA6 PE=1 SV=1	cme:CYME_CMT119C/1.3e-73/inorganic pyrophosphatase fused with fructose-1,6-bisphosphatase; K01507 inorganic pyrophosphatase [EC:3.6.1.1]	SPAC23C11.05/5.2e-124/[C] KOG1626 Inorganic pyrophosphatase/Nucleosome remodeling factor, subunit NURF38	PF00719/2.0E-54/Inorganic pyrophosphatase	biological_process:GO:0005975//carbohydrate metabolic process;cellular_component:GO:0016021//integral component of membrane;GO:0005737//cytoplasm;molecular_function:GO:0000287//magnesium ion binding;GO:0004427//inorganic diphosphatase activity;GO:0042132//fructose 1,6-bisphosphate 1-phosphatase activity;
CL10231.Contig1_All	4478	0.1	0.22	0.34	2.11	3.91	3.59	17.2679	254.5	3.8815	5.60284e-29	Up	XP_006465999.1/0.0e+00/PREDICTED: probable phospholipid-transporting ATPase 4 isoform X1 [Citrus sinensis]	XM_006465937.2/0.0/PREDICTED: Citrus sinensis probable phospholipid-transporting ATPase 4 (LOC102622310), transcript variant X2, mRNA	sp|Q9LNQ4|ALA4_ARATH/0.0e+00/Probable phospholipid-transporting ATPase 4 OS=Arabidopsis thaliana GN=ALA4 PE=3 SV=2	cit:102622310/0.0e+00/probable phospholipid-transporting ATPase 4; K01530 phospholipid-translocating ATPase [EC:3.6.3.1]	At1g17500/0.0e+00/[R] KOG0206 P-type ATPase	PF00122/1.1E-5/E1-E2 ATPase	cellular_component:GO:0016021//integral component of membrane;molecular_function:GO:0000287//magnesium ion binding;GO:0005524//ATP binding;GO:0004012//phospholipid-translocating ATPase activity;
CL10231.Contig2_All	4979	3.55	3.83	3.3	13.61	11.6	12.68	300.29	1124.13	1.90439	1.06739e-103	Up	XP_006466000.1/0.0e+00/PREDICTED: probable phospholipid-transporting ATPase 4 isoform X2 [Citrus sinensis]	XM_006465937.2/0.0/PREDICTED: Citrus sinensis probable phospholipid-transporting ATPase 4 (LOC102622310), transcript variant X2, mRNA	sp|Q9LNQ4|ALA4_ARATH/0.0e+00/Probable phospholipid-transporting ATPase 4 OS=Arabidopsis thaliana GN=ALA4 PE=3 SV=2	cit:102622310/0.0e+00/probable phospholipid-transporting ATPase 4; K01530 phospholipid-translocating ATPase [EC:3.6.3.1]	At1g17500/0.0e+00/[R] KOG0206 P-type ATPase	PTHR24092:SF55/0.0/--	cellular_component:GO:0016021//integral component of membrane;molecular_function:GO:0000287//magnesium ion binding;GO:0005524//ATP binding;GO:0004012//phospholipid-translocating ATPase activity;
CL10236.Contig1_All	295	3.82	2.52	2.87	0.26	0	0.51	10.9537	1.63566	-2.74348	0.00126501	Down	NA	NA	NA	NA	NA	NA	NA
CL10236.Contig2_All	255	3.11	3.67	2.55	0	0	0.31	8.98008	0.98745	-3.18495	0.000677108	Down	NA	NA	NA	NA	NA	NA	NA
CL10237.Contig1_All	561	3.34	2.64	3.28	0.7	0	0.11	24.9594	3.15942	-2.98185	1.13913e-05	Down	XP_019412929.1/1.9e-06/PREDICTED: DNA-directed RNA polymerase II subunit RPB1-like [Lupinus angustifolius] >OIV98532.1 hypothetical protein TanjilG_12118 [Lupinus angustifolius]	NA	NA	NA	NA	NA	NA
CL10238.Contig5_All	2629	0.13	0.18	0.07	0.57	0.57	0.53	5.69155	24.6377	2.11397	0.000136935	Up	KDO52525.1/5.6e-189/hypothetical protein CISIN_1g012679mg [Citrus sinensis]	XM_006448501.1/0.0/Citrus clementina hypothetical protein (CICLE_v10015942mg) mRNA, complete cds	sp|Q9S7I8|CDC22_ARATH/1.3e-179/Cell division cycle 20.2, cofactor of APC complex OS=Arabidopsis thaliana GN=CDC20-2 PE=1 SV=1	cit:102608283/3.1e-189/cell division cycle 20.2, cofactor of APC complex-like; K03363 cell division cycle 20, cofactor of APC complex	At4g33260/3.1e-179/[DO] KOG0305 Anaphase promoting complex, Cdc20, Cdh1, and Ama1 subunits	SM00320/2.5E-9/WD40 repeats	biological_process:GO:1904668//positive regulation of ubiquitin protein ligase activity;molecular_function:GO:0097027//ubiquitin-protein transferase activator activity;GO:0010997//anaphase-promoting complex binding;
CL10239.Contig2_All	1892	1.43	1.41	1.44	0.65	0.69	0.68	43.7512	21.7927	-1.00547	0.00597424	Down	XP_006432293.1/3.3e-127/hypothetical protein CICLE_v10000206mg [Citrus clementina] >ESR45533.1 hypothetical protein CICLE_v10000206mg [Citrus clementina]	XM_006471136.2/0.0/PREDICTED: Citrus sinensis TMV resistance protein N-like (LOC102627129), transcript variant X2, mRNA	sp|Q9SCX7|RPS4R_ARATH/2.4e-37/Inactive disease resistance protein RPS4 OS=Arabidopsis thaliana GN=RPS4 PE=3 SV=1	ghi:107918178/2.5e-55/TMV resistance protein N-like; K19613 leucine-rich repeat protein SHOC2	At4g36150/9.6e-37/[VT] LSE0039 A Disease resistance protein (TIR-NBS-LRR class)	SM00369/58.0/Leucine-rich repeats, typical (most populated) subfamily	molecular_function:GO:0043531//ADP binding;
CL10244.Contig1_All	1983	11.4	10.76	11.93	3.81	5.05	3.14	371.698	138.795	-1.42117	3.27904e-18	Down	XP_006475727.1/9.1e-277/PREDICTED: fe-S cluster assembly factor HCF101, chloroplastic isoform X1 [Citrus sinensis] >KDO54135.1 hypothetical protein CISIN_1g009574mg [Citrus sinensis]	XM_006475664.2/0.0/PREDICTED: Citrus sinensis hypothetical protein (LOC102622559), transcript variant X1, mRNA	sp|Q6STH5|HF101_ARATH/3.9e-240/Fe-S cluster assembly factor HCF101, chloroplastic OS=Arabidopsis thaliana GN=HCF101 PE=1 SV=1	cre:CHLREDRAFT_133548/3.1e-48/MNP1; ATP-binding protein, MRP/NBP35 family; K03593 ATP-binding protein involved in chromosome partitioning	At3g24430/9.1e-240/[D] KOG3022 Predicted ATPase, nucleotide-binding	PF10609/3.1E-81/NUBPL iron-transfer P-loop NTPase	molecular_function:GO:0005524//ATP binding;
CL10245.Contig2_All	679	6.87	5.45	5.32	2.37	2.05	2.26	60.371	24.2713	-1.3146	5.43884e-05	Down	XP_015387627.1/5.7e-21/PREDICTED: uncharacterized protein LOC102616412 [Citrus sinensis]	NA	NA	NA	NA	NA	NA
CL10246.Contig1_All	694	0.63	0.54	0.83	2.02	1.34	1.52	7.45629	17.7959	1.25502	0.0441069	Up	XP_005535385.1/7.7e-13/similar to trefoil factor [Cyanidioschyzon merolae strain 10D] >BAM79099.1 similar to trefoil factor [Cyanidioschyzon merolae strain 10D]	NA	NA	dosa:Os04t0498700-01/6.7e-06/Os04g0498700; Haem peroxidase family protein.; K00430 peroxidase [EC:1.11.1.7]	Hs4505285/5.6e-11/[WV] KOG1216 von Willebrand factor and related coagulation proteins	SM00754/2.8E-12/A domain in the BMP inhibitor chordin and in microbial proteins.	biological_process:GO:0016539//intein-mediated protein splicing;cellular_component:GO:0016021//integral component of membrane;molecular_function:GO:0008233//peptidase activity;
CL10248.Contig1_All	3221	6.1	6.34	6.67	2.57	3.2	2.67	343.637	160.555	-1.09782	1.55203e-17	Down	XP_015387664.1/1.4e-239/PREDICTED: uncharacterized protein LOC102628559 isoform X1 [Citrus sinensis]	XM_015532178.1/0.0/PREDICTED: Citrus sinensis uncharacterized LOC102628559 (LOC102628559), transcript variant X1, mRNA	sp|Q8VZS6|GIP1_ARATH/1.7e-14/GBF-interacting protein 1 OS=Arabidopsis thaliana GN=GIP1 PE=1 SV=1	cpap:110819790/6.1e-110/uncharacterized protein LOC110819790; K14638 solute carrier family 15 (peptide/histidine transporter), member 3/4	NA	PTHR12758:SF20/5.7E-190/--	NA
CL10248.Contig3_All	5350	1.55	1.45	1.47	5.43	5.23	4.96	134.899	498.191	1.88482	3.05468e-64	Up	XP_015387664.1/3.6e-235/PREDICTED: uncharacterized protein LOC102628559 isoform X1 [Citrus sinensis]	XM_015532178.1/0.0/PREDICTED: Citrus sinensis uncharacterized LOC102628559 (LOC102628559), transcript variant X1, mRNA	sp|Q8VZS6|GIP1_ARATH/2.8e-14/GBF-interacting protein 1 OS=Arabidopsis thaliana GN=GIP1 PE=1 SV=1	cpap:110819790/9.4e-108/uncharacterized protein LOC110819790; K14638 solute carrier family 15 (peptide/histidine transporter), member 3/4	At1g13520/2.6e-39/[S] LSE0399 A Uncharacterized protein	PTHR12758/1.4E-184/--	NA
CL10249.Contig1_All	527	0.87	0.99	0.76	1.87	3.93	3.19	7.29072	23.5738	1.69305	0.00372335	Up	NA	NA	NA	NA	NA	NA	NA
CL1025.Contig1_All	1806	1.13	1.68	1.24	3.79	3.22	3.36	40.6255	108.092	1.41179	1.16598e-08	Up	GAQ89047.1/2.9e-43/indoleamine 2,3-dioxygenase family protein [Klebsormidium nitens]	NA	NA	mng:MNEG_4429/1.1e-18/indoleamine 2,3-dioxygenase 2; K00463 indoleamine 2,3-dioxygenase [EC:1.13.11.52]	NA	PTHR28657/2.8E-269/--	biological_process:GO:0019441//tryptophan catabolic process to kynurenine;molecular_function:GO:0046872//metal ion binding;GO:0020037//heme binding;GO:0016810//hydrolase activity, acting on carbon-nitrogen (but not peptide) bonds;
CL10251.Contig12_All	587	11.49	13.85	15.53	4.67	2.69	4.74	118.313	37.2975	-1.66545	1.55927e-09	Down	XP_009133797.1/3.2e-68/PREDICTED: ubiquitin-40S ribosomal protein S27a-3-like [Brassica rapa] >XP_013623008.1 PREDICTED: ubiquitin-40S ribosomal protein S27a-3-like [Brassica oleracea var. oleracea] >XP_013734857.1 PREDICTED: ubiquitin-40S ribosomal protein S27a-3-like [Brassica napus] >XP_013734884.1 PREDICTED: ubiquitin-40S ribosomal protein S27a-3-like [Brassica napus] >CDY50916.1 BnaC03g72450…	BT101488.1/0.0/Picea glauca clone GQ01305_K14 mRNA sequence	sp|P59232|R27AB_ARATH/1.9e-70/Ubiquitin-40S ribosomal protein S27a-2 OS=Arabidopsis thaliana GN=RPS27AB PE=2 SV=2	boe:106296787/4.7e-69/ubiquitin-40S ribosomal protein S27a-3; K02977 small subunit ribosomal protein S27Ae	7297689/6.3e-72/[J] KOG0004 Ubiquitin/40S ribosomal protein S27a fusion	SM00213/9.3E-35/Ubiquitin homologues	biological_process:GO:0006511//ubiquitin-dependent protein catabolic process;GO:0006412//translation;cellular_component:GO:0005840//ribosome;GO:0005634//nucleus;GO:0005794//Golgi apparatus;GO:0022627//cytosolic small ribosomal subunit;molecular_function:GO:0003729//mRNA binding;GO:0046872//metal ion binding;GO:0003735//structural constituent of ribosome;
CL10251.Contig13_All	521	4.67	4.09	5.62	1.57	1.62	1.44	35.592	12.2103	-1.54345	0.000354645	Down	OAE27832.1/1.1e-69/hypothetical protein AXG93_1881s1230 [Marchantia polymorpha subsp. ruderalis]	BT131851.1/0.0/Oryza sativa clone RRlibD00772 mRNA sequence	sp|P59232|R27AB_ARATH/6.5e-70/Ubiquitin-40S ribosomal protein S27a-2 OS=Arabidopsis thaliana GN=RPS27AB PE=2 SV=2	zju:107426216/9.3e-69/ubiquitin-40S ribosomal protein S27a-like; K02977 small subunit ribosomal protein S27Ae	At2g47110/1.5e-69/[J] KOG0004 Ubiquitin/40S ribosomal protein S27a fusion	PS50053/30.539/Ubiquitin domain profile.	biological_process:GO:0006412//translation;cellular_component:GO:0005840//ribosome;molecular_function:GO:0003735//structural constituent of ribosome;
CL10251.Contig2_All	622	5.8	5.16	5.06	1.68	1.42	1.94	49.0613	16.5782	-1.5653	1.83946e-05	Down	OAE27832.1/1.5e-68/hypothetical protein AXG93_1881s1230 [Marchantia polymorpha subsp. ruderalis]	BT131851.1/0.0/Oryza sativa clone RRlibD00772 mRNA sequence	sp|P59232|R27AB_ARATH/1.2e-70/Ubiquitin-40S ribosomal protein S27a-2 OS=Arabidopsis thaliana GN=RPS27AB PE=2 SV=2	boe:106337319/2.9e-69/ubiquitin-40S ribosomal protein S27a-3; K02977 small subunit ribosomal protein S27Ae	7297689/1.5e-71/[J] KOG0004 Ubiquitin/40S ribosomal protein S27a fusion	SM00213/9.3E-35/Ubiquitin homologues	biological_process:GO:0006511//ubiquitin-dependent protein catabolic process;GO:0006412//translation;cellular_component:GO:0005840//ribosome;GO:0005634//nucleus;GO:0005794//Golgi apparatus;GO:0022627//cytosolic small ribosomal subunit;molecular_function:GO:0003729//mRNA binding;GO:0046872//metal ion binding;GO:0003735//structural constituent of ribosome;
CL10251.Contig6_All	590	2.83	3.35	2.76	0.61	1.44	0.58	25.1707	8.24717	-1.60977	0.00420769	Down	XP_010069740.1/4.1e-76/PREDICTED: ubiquitin-40S ribosomal protein S27a isoform X1 [Eucalyptus grandis]	BT131851.1/0.0/Oryza sativa clone RRlibD00772 mRNA sequence	sp|P59232|R27AB_ARATH/6.7e-71/Ubiquitin-40S ribosomal protein S27a-2 OS=Arabidopsis thaliana GN=RPS27AB PE=2 SV=2	egr:104456611/6.1e-77/ubiquitin-40S ribosomal protein S27a; K08770 ubiquitin C	At2g47110/1.6e-70/[J] KOG0004 Ubiquitin/40S ribosomal protein S27a fusion	PF01599/2.4E-26/Ribosomal protein S27a	biological_process:GO:0006412//translation;cellular_component:GO:0005840//ribosome;molecular_function:GO:0003735//structural constituent of ribosome;
CL10251.Contig7_All	573	23.47	18.34	22.87	6.74	4.87	5.18	183.431	50.405	-1.8636	1.93655e-18	Down	OAE27832.1/5.6e-70/hypothetical protein AXG93_1881s1230 [Marchantia polymorpha subsp. ruderalis]	BT131851.1/0.0/Oryza sativa clone RRlibD00772 mRNA sequence	sp|P59232|R27AB_ARATH/3.2e-70/Ubiquitin-40S ribosomal protein S27a-2 OS=Arabidopsis thaliana GN=RPS27AB PE=2 SV=2	cit:102610115/4.6e-69/ubiquitin-40S ribosomal protein S27a-like; K02977 small subunit ribosomal protein S27Ae	At2g47110/7.6e-70/[J] KOG0004 Ubiquitin/40S ribosomal protein S27a fusion	SM00213/9.3E-35/Ubiquitin homologues	biological_process:GO:0006412//translation;cellular_component:GO:0005840//ribosome;molecular_function:GO:0003735//structural constituent of ribosome;
CL10251.Contig9_All	760	32.96	28.71	30.92	9.08	9.84	9.11	361.958	115.707	-1.64534	1.0434e-35	Down	XP_009133797.1/9.1e-68/PREDICTED: ubiquitin-40S ribosomal protein S27a-3-like [Brassica rapa] >XP_013623008.1 PREDICTED: ubiquitin-40S ribosomal protein S27a-3-like [Brassica oleracea var. oleracea] >XP_013734857.1 PREDICTED: ubiquitin-40S ribosomal protein S27a-3-like [Brassica napus] >XP_013734884.1 PREDICTED: ubiquitin-40S ribosomal protein S27a-3-like [Brassica napus] >CDY50916.1 BnaC03g72450…	BT131851.1/0.0/Oryza sativa clone RRlibD00772 mRNA sequence	sp|P59232|R27AB_ARATH/5.6e-70/Ubiquitin-40S ribosomal protein S27a-2 OS=Arabidopsis thaliana GN=RPS27AB PE=2 SV=2	brp:103830351/1.4e-68/ubiquitin-40S ribosomal protein S27a-3; K02977 small subunit ribosomal protein S27Ae	At2g47110/1.3e-69/[J] KOG0004 Ubiquitin/40S ribosomal protein S27a fusion	NA	biological_process:GO:0006511//ubiquitin-dependent protein catabolic process;GO:0006412//translation;cellular_component:GO:0005840//ribosome;GO:0005634//nucleus;GO:0005794//Golgi apparatus;GO:0022627//cytosolic small ribosomal subunit;molecular_function:GO:0003729//mRNA binding;GO:0046872//metal ion binding;GO:0003735//structural constituent of ribosome;
CL10253.Contig1_All	957	5.46	5.75	4.83	1.8	2.26	2	80.5806	32.6294	-1.30426	1.88974e-06	Down	YP_008816160.1/5.0e-71/cytochrome c oxidase subunit 2 (mitochondrion) [Roya obtusa] >AGZ90369.1 cytochrome c oxidase subunit 2 (mitochondrion) [Roya obtusa]	AF222718.1/0.0/Chrysodidymus synuroideus mitochondrion, complete genome	sp|P26857|COX2_MARPO/2.4e-70/Cytochrome c oxidase subunit 2 OS=Marchantia polymorpha GN=COX2 PE=3 SV=3	csl:CospCoM_p09/6.9e-70/cox2; cytochrome c oxidase subunit 2; K02261 cytochrome c oxidase subunit 2	SPMi010/1.9e-73/[C] KOG4767 Cytochrome c oxidase, subunit II, and related proteins	PTHR22888:SF9/3.4E-70/--	biological_process:GO:0022900//electron transport chain;cellular_component:GO:0005743//mitochondrial inner membrane;GO:0016021//integral component of membrane;GO:0070469//respiratory chain;molecular_function:GO:0004129//cytochrome-c oxidase activity;GO:0005507//copper ion binding;
CL10253.Contig2_All	934	5.87	4.35	5.75	1.78	1.22	0.96	77.9114	21.159	-1.88057	1.2731e-08	Down	YP_008816160.1/1.3e-71/cytochrome c oxidase subunit 2 (mitochondrion) [Roya obtusa] >AGZ90369.1 cytochrome c oxidase subunit 2 (mitochondrion) [Roya obtusa]	NA	sp|P26857|COX2_MARPO/6.2e-71/Cytochrome c oxidase subunit 2 OS=Marchantia polymorpha GN=COX2 PE=3 SV=3	csl:CospCoM_p09/2.0e-69/cox2; cytochrome c oxidase subunit 2; K02261 cytochrome c oxidase subunit 2	SPMi010/3.1e-73/[C] KOG4767 Cytochrome c oxidase, subunit II, and related proteins	PR01166/8.4E-36/Cytochrome c oxidase subunit II signature	biological_process:GO:0022900//electron transport chain;cellular_component:GO:0005743//mitochondrial inner membrane;GO:0016021//integral component of membrane;GO:0070469//respiratory chain;molecular_function:GO:0004129//cytochrome-c oxidase activity;GO:0005507//copper ion binding;
CL10262.Contig1_All	1579	0.65	0.6	0.45	2.93	2.07	2.72	15.0851	69.3089	2.19992	2.09205e-10	Up	XP_001777298.1/1.3e-31/predicted protein [Physcomitrella patens] >EDQ57828.1 predicted protein [Physcomitrella patens]	NA	sp|Q9FLQ7|FH20_ARATH/3.4e-13/Formin-like protein 20 OS=Arabidopsis thaliana GN=FH20 PE=2 SV=3	osa:4346972/2.9e-25/annexin D5; K17098 annexin D	CE23956/8.5e-47/[U] KOG0819 Annexin	PR01813/2.8E-9/Fungal annexin type XIV signature	molecular_function:GO:0005544//calcium-dependent phospholipid binding;GO:0005509//calcium ion binding;
CL10262.Contig2_All	1590	0.13	0.44	0.45	1.53	1.63	0.49	8.98343	31.7173	1.81993	0.00557043	Up	XP_001777298.1/1.3e-31/predicted protein [Physcomitrella patens] >EDQ57828.1 predicted protein [Physcomitrella patens]	NA	sp|Q9FLQ7|FH20_ARATH/1.4e-14/Formin-like protein 20 OS=Arabidopsis thaliana GN=FH20 PE=2 SV=3	osa:4346972/3.0e-25/annexin D5; K17098 annexin D	CE23956/1.7e-47/[U] KOG0819 Annexin	PF00191/5.4E-14/Annexin	molecular_function:GO:0005544//calcium-dependent phospholipid binding;GO:0005509//calcium ion binding;
CL10263.Contig2_All	1698	27.51	25.46	27.61	7.4	7.43	8.26	748.453	226.881	-1.72198	4.47568e-78	Down	XP_006431373.1/3.0e-26/hypothetical protein CICLE_v10000176mg [Citrus clementina] >ESR44613.1 hypothetical protein CICLE_v10000176mg [Citrus clementina]	NA	sp|Q9LT96|Y5977_ARATH/1.3e-13/Probable leucine-rich repeat receptor-like protein kinase At5g49770 OS=Arabidopsis thaliana GN=At5g49770 PE=2 SV=1	pavi:110758279/1.5e-11/probable leucine-rich repeat receptor-like protein kinase At5g49770; K04733 interleukin-1 receptor-associated kinase 4 [EC:2.7.11.1]	At1g79620/2.1e-19/[T] LSE0002 A Receptor protein kinase containing LRR repeats	PTHR27003/4.6E-26/--	cellular_component:GO:0016021//integral component of membrane;molecular_function:GO:0004674//protein serine/threonine kinase activity;GO:0005524//ATP binding;
CL10263.Contig3_All	1317	32.68	30.65	30.53	8.09	8.28	8.79	666.985	188.918	-1.8199	1.27489e-79	Down	XP_006470792.1/3.9e-26/PREDICTED: probable leucine-rich repeat receptor-like protein kinase At5g49770 [Citrus sinensis]	NA	sp|Q9LT96|Y5977_ARATH/1.7e-13/Probable leucine-rich repeat receptor-like protein kinase At5g49770 OS=Arabidopsis thaliana GN=At5g49770 PE=2 SV=1	pavi:110758279/2.0e-11/probable leucine-rich repeat receptor-like protein kinase At5g49770; K04733 interleukin-1 receptor-associated kinase 4 [EC:2.7.11.1]	At1g79620/2.1e-19/[T] LSE0002 A Receptor protein kinase containing LRR repeats	SM00343/0.025/zinc finger	cellular_component:GO:0016021//integral component of membrane;molecular_function:GO:0004674//protein serine/threonine kinase activity;GO:0005524//ATP binding;
CL10269.Contig2_All	2054	1.07	0.9	0.63	12.74	12.52	12.49	30.3031	451.118	3.89597	5.23747e-103	Up	BAK04968.1/6.6e-153/predicted protein [Hordeum vulgare subsp. vulgare]	NA	sp|Q8GXR2|PLT6_ARATH/2.0e-21/Probable polyol transporter 6 OS=Arabidopsis thaliana GN=PLT6 PE=2 SV=2	lang:109335312/8.6e-17/inositol transporter 1-like; K08150 MFS transporter, SP family, solute carrier family 2 (myo-inositol transporter), member 13	YJR160c/2.5e-115/[R] KOG0254 Predicted transporter (major facilitator superfamily)	PTHR23500:SF162/2.3E-262/--	cellular_component:GO:0016021//integral component of membrane;
CL10273.Contig1_All	1561	0.59	0.64	0.32	2.11	1.46	3.07	13.3549	58.5663	2.1327	1.19562e-06	Up	XP_011006130.1/7.1e-208/PREDICTED: chalcone synthase [Populus euphratica]	GU288819.1/0.0/Litchi chinensis chalcone synthase (chs) mRNA, complete cds	sp|Q9SBL5|CHS4_SORBI/1.1e-202/Chalcone synthase 4 OS=Sorghum bicolor GN=CHS4 PE=3 SV=1	pop:POPTR_0014s14200g/3.7e-206/POPTRDRAFT_572875; chalcone synthase family protein; K00660 chalcone synthase [EC:2.3.1.74]	At5g13930/1.9e-195/[Q] LSE0252 A Chalcone synthase	PF02797/2.4E-71/Chalcone and stilbene synthases, C-terminal domain	biological_process:GO:0009058//biosynthetic process;molecular_function:GO:0016747//transferase activity, transferring acyl groups other than amino-acyl groups;
CL10273.Contig2_All	1544	1.08	1.18	1.22	3.56	3.22	2.58	29.408	81.93	1.47818	2.1578e-07	Up	XP_011006130.1/7.0e-208/PREDICTED: chalcone synthase [Populus euphratica]	GU288819.1/0.0/Litchi chinensis chalcone synthase (chs) mRNA, complete cds	sp|Q9SBL5|CHS4_SORBI/1.1e-202/Chalcone synthase 4 OS=Sorghum bicolor GN=CHS4 PE=3 SV=1	pop:POPTR_0014s14200g/3.7e-206/POPTRDRAFT_572875; chalcone synthase family protein; K00660 chalcone synthase [EC:2.3.1.74]	At5g13930/1.8e-195/[Q] LSE0252 A Chalcone synthase	PF02797/2.4E-71/Chalcone and stilbene synthases, C-terminal domain	biological_process:GO:0009058//biosynthetic process;molecular_function:GO:0016747//transferase activity, transferring acyl groups other than amino-acyl groups;
CL1028.Contig1_All	850	12.21	11.44	12.31	4.24	4.07	4.84	159.096	61.8615	-1.36279	4.09464e-13	Down	GAX82538.1/1.5e-26/hypothetical protein CEUSTIGMA_g9965.t1 [Chlamydomonas eustigma]	NA	sp|F4J300|SDR5_ARATH/5.0e-11/Short-chain dehydrogenase reductase 5 OS=Arabidopsis thaliana GN=SDR5 PE=3 SV=1	han:110915852/7.6e-12/dehydrogenase/reductase SDR family member 7; K11165 dehydrogenase/reductase SDR family member 7 [EC:1.1.-.-]	YDL114w/7.9e-15/[Q] KOG1201 Hydroxysteroid 17-beta dehydrogenase 11	PS00061/-/Short-chain dehydrogenases/reductases family signature.	molecular_function:GO:0016491//oxidoreductase activity;
CL1028.Contig2_All	909	6.25	5.91	5.69	2.44	2.09	1.72	84.4671	31.3573	-1.42959	1.23342e-07	Down	GAX82538.1/5.5e-27/hypothetical protein CEUSTIGMA_g9965.t1 [Chlamydomonas eustigma]	NA	sp|F4J300|SDR5_ARATH/2.4e-11/Short-chain dehydrogenase reductase 5 OS=Arabidopsis thaliana GN=SDR5 PE=3 SV=1	mcha:111012595/1.1e-11/tropinone reductase-like 3; K11147 dehydrogenase/reductase SDR family member 4 [EC:1.1.-.-]	YDL114w/3.8e-15/[Q] KOG1201 Hydroxysteroid 17-beta dehydrogenase 11	PR00081/4.5E-14/Glucose/ribitol dehydrogenase family signature	molecular_function:GO:0016491//oxidoreductase activity;
CL1028.Contig3_All	1320	7.18	6.43	6.34	2.41	1.84	2.03	141.349	47.202	-1.58234	1.1797e-13	Down	GAX82538.1/2.3e-26/hypothetical protein CEUSTIGMA_g9965.t1 [Chlamydomonas eustigma]	NA	sp|P80028|TRXH_CHLRE/3.2e-20/Thioredoxin H-type OS=Chlamydomonas reinhardtii GN=TRXH PE=1 SV=3	apro:F751_2346/4.5e-19/Thioredoxin H-type; K03671 thioredoxin 1	YGR209c/1.2e-17/[O] KOG0907 Thioredoxin	PS00061/-/Short-chain dehydrogenases/reductases family signature.	biological_process:GO:0006662//glycerol ether metabolic process;GO:0045454//cell redox homeostasis;cellular_component:GO:0005623//cell;molecular_function:GO:0015035//protein disulfide oxidoreductase activity;GO:0016491//oxidoreductase activity;
CL10286.Contig2_All	908	0.51	0.18	0.72	1.34	1.41	1.07	6.62878	18.3238	1.4669	0.0288963	Up	GAX14509.1/1.9e-24/hypothetical protein FisN_11Hh028 [Fistulifera solaris]	NA	NA	NA	SPAC9E9.13/3.0e-36/[O] KOG3158 HSP90 co-chaperone p23	PF04969/6.5E-7/CS domain	NA
CL10287.Contig1_All	2417	1.46	1.55	1.43	5.52	5.37	6.44	60.0336	245.205	2.03015	6.9332e-32	Up	BAJ88022.1/6.8e-258/predicted protein, partial [Hordeum vulgare subsp. vulgare]	AK356807.1/0.0/Hordeum vulgare subsp. vulgare mRNA for predicted protein, partial cds, clone: NIASHv1040B06	sp|P49118|BIP_SOLLC/4.4e-246/Luminal-binding protein OS=Solanum lycopersicum PE=2 SV=1	gsl:Gasu_17030/2.3e-247/molecular chaperone DnaK; K09490 heat shock 70kDa protein 5	YJL034w/5.5e-271/[O] KOG0100 Molecular chaperones GRP78/BiP/KAR2, HSP70 superfamily	PTHR19375/0.0/--	molecular_function:GO:0005524//ATP binding;
CL10291.Contig3_All	656	3.15	2.56	3.55	0.37	0.65	0.39	29.6143	4.99645	-2.56732	2.37903e-06	Down	XP_009821807.1/2.8e-33/60S ribosomal protein L31 [Aphanomyces astaci] >ETV89407.1 60S ribosomal protein L31 [Aphanomyces astaci]	AK107805.1/0.0/Oryza sativa Japonica Group cDNA clone:002-133-E07, full insert sequence	sp|Q9XGL4|RL31_CYAPA/5.0e-35/60S ribosomal protein L31 OS=Cyanophora paradoxa GN=RPL31 PE=3 SV=1	zma:100280866/1.1e-31/magi104697; uncharacterized protein LOC100280866; K02910 large subunit ribosomal protein L31e	YLR406c/2.1e-36/[J] KOG0893 60S ribosomal protein L31	NA	biological_process:GO:0006412//translation;cellular_component:GO:0005840//ribosome;molecular_function:GO:0003735//structural constituent of ribosome;
CL10291.Contig4_All	644	2.1	3.06	1.73	0.8	0.49	0.58	21.6457	6.89321	-1.65083	0.00514238	Down	XP_009821807.1/8.6e-35/60S ribosomal protein L31 [Aphanomyces astaci] >ETV89407.1 60S ribosomal protein L31 [Aphanomyces astaci]	NA	sp|Q9XGL4|RL31_CYAPA/4.5e-36/60S ribosomal protein L31 OS=Cyanophora paradoxa GN=RPL31 PE=3 SV=1	ats:109778799/2.0e-33/LOC109778799; 60S ribosomal protein L31; K02910 large subunit ribosomal protein L31e	YLR406c/2.7e-36/[J] KOG0893 60S ribosomal protein L31	PTHR10956/4.2E-81/--	biological_process:GO:0006412//translation;cellular_component:GO:0005840//ribosome;molecular_function:GO:0003735//structural constituent of ribosome;
CL10291.Contig5_All	646	4.21	5.35	5.03	1.41	0.8	1.74	46.374	13.6488	-1.76454	1.37152e-05	Down	XP_009821807.1/2.8e-33/60S ribosomal protein L31 [Aphanomyces astaci] >ETV89407.1 60S ribosomal protein L31 [Aphanomyces astaci]	AK107805.1/0.0/Oryza sativa Japonica Group cDNA clone:002-133-E07, full insert sequence	sp|Q9XGL4|RL31_CYAPA/5.0e-35/60S ribosomal protein L31 OS=Cyanophora paradoxa GN=RPL31 PE=3 SV=1	obr:102722685/1.1e-31/60S ribosomal protein L31-like; K02910 large subunit ribosomal protein L31e	YLR406c/2.1e-36/[J] KOG0893 60S ribosomal protein L31	NA	biological_process:GO:0006412//translation;cellular_component:GO:0005840//ribosome;molecular_function:GO:0003735//structural constituent of ribosome;
CL10296.Contig1_All	1532	27.41	22.52	24.53	56.12	50.03	53.79	622.354	1408.05	1.17789	6.47483e-49	Up	XP_021646185.1/1.0e-150/syntaxin-121-like [Hevea brasiliensis]	XM_006481549.2/0.0/PREDICTED: Citrus sinensis syntaxin-121 (LOC102629306), mRNA	sp|Q9ZSD4|SY121_ARATH/1.9e-138/Syntaxin-121 OS=Arabidopsis thaliana GN=SYP121 PE=1 SV=1	hbr:110639499/1.5e-151/syntaxin-121-like; K08486 syntaxin 1B/2/3	At3g11820/4.6e-138/[U] KOG0810 SNARE protein Syntaxin 1 and related proteins	PTHR19957/3.7E-216/--	biological_process:GO:0006886//intracellular protein transport;GO:0016192//vesicle-mediated transport;cellular_component:GO:0005622//intracellular;GO:0016021//integral component of membrane;molecular_function:GO:0005484//SNAP receptor activity;
CL10300.Contig1_All	437	0.15	0	0.16	1.26	0.61	0.77	1.16187	5.21294	2.16565	0.0390039	Up	NA	NA	NA	NA	YLR126c/1.4e-07/[F] KOG3179 Predicted glutamine synthetase	PTHR11922/6.7E-48/--	NA
CL10300.Contig2_All	1364	0.65	0.91	0.7	13.69	15.04	14.68	17.4648	337.378	4.27185	1.17501e-77	Up	XP_002532757.1/5.0e-16/PREDICTED: putative glutamine amidotransferase YLR126C [Ricinus communis] >EEF29614.1 GMP synthase, putative [Ricinus communis]	NA	sp|Q9M0A7|GGP1_ARATH/2.1e-11/Gamma-glutamyl peptidase 1 OS=Arabidopsis thaliana GN=GGP1 PE=1 SV=1	han:110929502/1.7e-16/gamma-glutamyl peptidase 5-like; K22314 glucosinolate gamma-glutamyl hydrolase [EC:3.4.19.16]	SPAC13C5.04/5.3e-21/[F] KOG3179 Predicted glutamine synthetase	PTHR11922/3.4E-81/--	NA
CL10307.Contig1_All	2993	0.96	1.13	1.66	0.46	0.39	0.71	61.5307	27.4019	-1.16703	0.00342441	Down	XP_006470767.1/8.0e-192/PREDICTED: TMV resistance protein N-like [Citrus sinensis]	AC188370.9/0.0/Glycine max clone gmp1-120k16, complete sequence	sp|Q40392|TMVRN_NICGU/1.6e-88/TMV resistance protein N OS=Nicotiana glutinosa GN=N PE=1 SV=1	pavi:110747480/7.7e-83/TMV resistance protein N-like; K19613 leucine-rich repeat protein SHOC2	At4g12010/8.4e-104/[VT] LSE0039 A Disease resistance protein (TIR-NBS-LRR class)	PTHR11017:SF162/1.8E-131/--	biological_process:GO:0007165//signal transduction;molecular_function:GO:0043531//ADP binding;
CL1031.Contig10_All	3811	0.14	0.17	0.52	0.76	0.83	0.6	18.2656	48.2169	1.40041	0.00995702	Up	XP_006430853.1/1.7e-109/hypothetical protein CICLE_v10011860mg [Citrus clementina] >ESR44093.1 hypothetical protein CICLE_v10011860mg [Citrus clementina]	XM_002305254.2/0.0/Populus trichocarpa hypothetical protein (POPTR_0004s10600g) mRNA, complete cds	sp|Q9FVR6|Y1222_ARATH/6.5e-26/Uncharacterized protein At1g32220, chloroplastic OS=Arabidopsis thaliana GN=At1g32220 PE=2 SV=1	bna:106453259/1.9e-30/uncharacterized protein LOC106453259; K00993 ethanolaminephosphotransferase [EC:2.7.8.1]	At1g61600/3.8e-77/[S] LSE0399 A Uncharacterized protein	PTHR31050:SF0/1.8E-137/--	NA
CL10310.Contig1_All	2416	1.36	0.81	1.04	2.99	2.43	3.17	43.69	121.06	1.47035	1.39103e-08	Up	GAX76831.1/1.8e-32/hypothetical protein CEUSTIGMA_g4277.t1 [Chlamydomonas eustigma]	NA	NA	mng:MNEG_3800/5.9e-17/aromatic amino acid aminotransferase I; K00838 aromatic amino acid aminotransferase I / 2-aminoadipate transaminase [EC:2.6.1.57 2.6.1.39 2.6.1.27 2.6.1.5]	SPAC56E4.03/4.2e-45/[E] KOG0634 Aromatic amino acid aminotransferase and related proteins	PTHR11751:SF396/1.8E-162/--	biological_process:GO:0009058//biosynthetic process;molecular_function:GO:0080130//L-phenylalanine:2-oxoglutarate aminotransferase activity;GO:0008793//aromatic-amino-acid:2-oxoglutarate aminotransferase activity;GO:0003824//catalytic activity;GO:0030170//pyridoxal phosphate binding;
CL10310.Contig2_All	2403	1.22	0.82	1.17	3.52	3.2	3.25	43.318	139.969	1.69208	3.23175e-14	Up	GAX76831.1/1.8e-32/hypothetical protein CEUSTIGMA_g4277.t1 [Chlamydomonas eustigma]	NA	NA	mng:MNEG_3800/5.9e-17/aromatic amino acid aminotransferase I; K00838 aromatic amino acid aminotransferase I / 2-aminoadipate transaminase [EC:2.6.1.57 2.6.1.39 2.6.1.27 2.6.1.5]	SPAC56E4.03/4.2e-45/[E] KOG0634 Aromatic amino acid aminotransferase and related proteins	PTHR11751/2.3E-162/--	biological_process:GO:0009058//biosynthetic process;molecular_function:GO:0080130//L-phenylalanine:2-oxoglutarate aminotransferase activity;GO:0008793//aromatic-amino-acid:2-oxoglutarate aminotransferase activity;GO:0003824//catalytic activity;GO:0030170//pyridoxal phosphate binding;
CL10313.Contig2_All	465	13.1	9.07	10.74	4.85	4.33	5.71	72.6459	34.9815	-1.05429	0.000666036	Down	NA	NA	NA	NA	NA	NA	NA
CL10314.Contig1_All	1769	0.56	0.69	0.5	2.1	2.05	1.95	17.5248	61.9982	1.82283	2.70405e-08	Up	NP_001142253.1/1.1e-66/uncharacterized protein LOC100274422 [Zea mays] >XP_018753539.1 hypothetical protein FVEG_07477 [Fusarium verticillioides 7600] >ACF88011.1 unknown [Zea mays] >EWG47348.1 hypothetical protein FVEG_07477 [Fusarium verticillioides 7600]	NA	NA	NA	NA	PTHR31468:SF5/1.1E-248/--	cellular_component:GO:0016021//integral component of membrane;GO:0005886//plasma membrane;GO:0031225//anchored component of membrane;molecular_function:GO:0016740//transferase activity;
CL10314.Contig3_All	1717	0.65	1.22	0.69	2.17	1.85	2.48	24.6081	63.9344	1.37746	0.000116837	Up	NP_001142253.1/7.1e-68/uncharacterized protein LOC100274422 [Zea mays] >XP_018753539.1 hypothetical protein FVEG_07477 [Fusarium verticillioides 7600] >ACF88011.1 unknown [Zea mays] >EWG47348.1 hypothetical protein FVEG_07477 [Fusarium verticillioides 7600]	NA	NA	NA	NA	PTHR31468:SF5/3.0E-247/--	cellular_component:GO:0016021//integral component of membrane;GO:0005886//plasma membrane;GO:0031225//anchored component of membrane;molecular_function:GO:0016740//transferase activity;
CL10315.Contig2_All	770	1.13	1.52	1.14	0.33	0.16	0.4	14.6029	4.18793	-1.80195	0.00957224	Down	BAK04853.1/2.2e-24/predicted protein [Hordeum vulgare subsp. vulgare]	NA	sp|Q9LTX9|HSP7G_ARATH/6.6e-18/Heat shock 70 kDa protein 7, chloroplastic OS=Arabidopsis thaliana GN=HSP70-7 PE=2 SV=1	cme:CYME_CML205C/1.4e-17/DnaK-type molecular chaperone, mitochondrial precursor; K04043 molecular chaperone DnaK	YJR045c/1.2e-33/[O] KOG0102 Molecular chaperones mortalin/PBP74/GRP75, HSP70 superfamily	PF10712/1.8E-8/NAD-specific glutamate dehydrogenase	biological_process:GO:0006457//protein folding;molecular_function:GO:0005524//ATP binding;GO:0051082//unfolded protein binding;
CL10317.Contig1_All	1810	2.16	1.99	2.02	0.68	0.83	0.66	61.0092	23.2452	-1.39209	9.85988e-06	Down	XP_021294537.1/4.2e-204/uncharacterized protein LOC110424307 [Herrania umbratica]	XM_015526983.1/0.0/PREDICTED: Citrus sinensis G-type lectin S-receptor-like serine/threonine-protein kinase At1g11410 (LOC102627899), transcript variant X3, mRNA	sp|Q9ZT07|RKS1_ARATH/5.1e-178/G-type lectin S-receptor-like serine/threonine-protein kinase RKS1 OS=Arabidopsis thaliana GN=RKS1 PE=3 SV=3	hbr:110633871/6.1e-152/G-type lectin S-receptor-like serine/threonine-protein kinase At1g11410; K04733 interleukin-1 receptor-associated kinase 4 [EC:2.7.11.1]	At1g11340/3.3e-172/[T] LSE0015 A Receptor-like protein kinase, contains lectin domains	PF08276/5.1E-17/PAN-like domain	biological_process:GO:0048544//recognition of pollen;cellular_component:GO:0016021//integral component of membrane;molecular_function:GO:0030246//carbohydrate binding;GO:0004674//protein serine/threonine kinase activity;GO:0005524//ATP binding;
CL10319.Contig2_All	1090	0.5	0.71	0.89	0.17	0.16	0.05	11.6849	2.89298	-2.01402	0.0105645	Down	XP_015389100.1/4.5e-84/PREDICTED: protein ACCELERATED CELL DEATH 6-like [Citrus sinensis] >KDO53907.1 hypothetical protein CISIN_1g008102mg [Citrus sinensis]	NA	sp|Q8LPS2|ACD6_ARATH/3.8e-19/Protein ACCELERATED CELL DEATH 6 OS=Arabidopsis thaliana GN=ACD6 PE=1 SV=1	hbr:110673220/1.5e-73/uncharacterized protein LOC110673220; K15503 serine/threonine-protein phosphatase 6 regulatory ankyrin repeat subunit B	At4g03500/7.5e-26/[R] KOG0504 FOG: Ankyrin repeat	SM00248/130.0/ankyrin repeats	biological_process:GO:2000031//regulation of salicylic acid mediated signaling pathway;GO:0031347//regulation of defense response;GO:0071446//cellular response to salicylic acid stimulus;cellular_component:GO:0016021//integral component of membrane;
CL10322.Contig1_All	677	0.09	0.09	0	0.47	0.64	0.37	1.13797	4.87829	2.09991	0.0483018	Up	XP_017241397.1/2.0e-74/PREDICTED: aldehyde dehydrogenase family 2 member B4, mitochondrial-like [Daucus carota subsp. sativus]	FP092885.1/0.0/Phyllostachys edulis cDNA clone: bphylf056a20, full insert sequence	sp|Q9SU63|AL2B4_ARATH/4.8e-73/Aldehyde dehydrogenase family 2 member B4, mitochondrial OS=Arabidopsis thaliana GN=ALDH2B4 PE=1 SV=1	sot:102588058/9.5e-74/aldehyde dehydrogenase family 2 member B7, mitochondrial-like; K00128 aldehyde dehydrogenase (NAD+) [EC:1.2.1.3]	SPAC9E9.09c/3.8e-89/[C] KOG2450 Aldehyde dehydrogenase	PS00687/-/Aldehyde dehydrogenases glutamic acid active site.	molecular_function:GO:0016491//oxidoreductase activity;
CL10332.Contig4_All	2514	0.84	0.93	0.71	3.25	4.08	3.82	34.6818	163.494	2.23699	1.49582e-23	Up	XP_002515236.1/7.3e-138/PREDICTED: gibberellin 2-beta-dioxygenase 2 [Ricinus communis] >EEF47220.1 gibberellin 2-oxidase, putative [Ricinus communis]	XM_016036209.1/0.0/PREDICTED: Ziziphus jujuba gibberellin 2-beta-dioxygenase 2 (LOC107426109), mRNA	sp|Q9XHM5|G2OX2_PEA/2.7e-121/Gibberellin 2-beta-dioxygenase 2 OS=Pisum sativum GN=GA2OX2 PE=2 SV=1	rcu:8267296/1.1e-138/gibberellin 2-beta-dioxygenase 2; K04125 gibberellin 2-oxidase [EC:1.14.11.13]	At1g02400/2.1e-100/[QR] KOG0143 Iron/ascorbate family oxidoreductases	PS51471/11.342/Fe(2+) 2-oxoglutarate dioxygenase domain profile.	molecular_function:GO:0046872//metal ion binding;GO:0016707//gibberellin 3-beta-dioxygenase activity;GO:0016491//oxidoreductase activity;
CL10334.Contig3_All	6110	0.27	0.6	0.43	0.78	0.94	0.93	44.5469	95.7437	1.10385	0.000637308	Up	XP_021866143.1/0.0e+00/uncharacterized protein LOC110804849 [Spinacia oleracea]	XM_018609478.1/0.0/PREDICTED: Raphanus sativus uncharacterized LOC108836303 (LOC108836303), mRNA	sp|P31843|RRPO_OENBE/8.0e-18/RNA-directed DNA polymerase homolog OS=Oenothera berteroana PE=4 SV=1	pmum:103334684/8.0e-87/disease resistance protein RPM1-like; K13457 disease resistance protein RPM1	At1g20390/0.0e+00/[R] KOG0017 FOG: Transposon-encoded proteins with TYA, reverse transcriptase, integrase domains in various combinations	PF00078/2.1E-24/Reverse transcriptase (RNA-dependent DNA polymerase)	NA
CL10336.Contig1_All	2258	10.13	9.06	10.15	28.06	26.27	26.59	367.09	1068.12	1.54086	1.78264e-95	Up	XP_006476291.1/1.0e-223/PREDICTED: methionine gamma-lyase [Citrus sinensis]	XM_006476228.2/0.0/PREDICTED: Citrus sinensis methionine gamma-lyase (LOC102609475), mRNA	sp|Q9SGU9|MGL_ARATH/2.3e-196/Methionine gamma-lyase OS=Arabidopsis thaliana GN=MGL PE=1 SV=1	cit:102609475/1.5e-224/methionine gamma-lyase; K01761 methionine-gamma-lyase [EC:4.4.1.11]	At1g64660/5.4e-196/[E] KOG0053 Cystathionine beta-lyases/cystathionine gamma-synthases	PF01053/1.0E-81/Cys/Met metabolism PLP-dependent enzyme	molecular_function:GO:0016829//lyase activity;GO:0003824//catalytic activity;GO:0030170//pyridoxal phosphate binding;
CL10340.Contig3_All	1200	0.53	0.82	1.06	0.33	0.31	0.06	14.2592	4.91648	-1.53619	0.0476746	Down	NA	CP018164.1/0.0/Oryza sativa Indica Group cultivar Shuhui498 chromosome 8 sequence	NA	NA	NA	NA	NA
CL10341.Contig2_All	2122	1.29	1.28	1.47	0.5	0.44	0.7	46.5664	20.5268	-1.18178	0.0016959	Down	XP_006484293.1/1.1e-272/PREDICTED: ruBisCO large subunit-binding protein subunit beta, chloroplastic [Citrus sinensis]	XM_006484230.2/0.0/PREDICTED: Citrus sinensis ruBisCO large subunit-binding protein subunit beta, chloroplastic (LOC102609990), transcript variant X1, mRNA	sp|Q9C667|CPNB4_ARATH/3.2e-240/Chaperonin 60 subunit beta 4, chloroplastic OS=Arabidopsis thaliana GN=CPN60B4 PE=1 SV=1	cit:102609990/1.7e-273/ruBisCO large subunit-binding protein subunit beta, chloroplastic; K04077 chaperonin GroEL	At1g26230/7.5e-240/[O] KOG0356 Mitochondrial chaperonin, Cpn60/Hsp60p	PTHR11353:SF81/0.0/--	biological_process:GO:0006458//'de novo' protein folding;GO:0061077//chaperone-mediated protein folding;GO:0042026//protein refolding;cellular_component:GO:0005737//cytoplasm;GO:0005829//cytosol;GO:0009941//chloroplast envelope;GO:0009507//chloroplast;GO:0009570//chloroplast stroma;molecular_function:GO:0005524//ATP binding;GO:0051082//unfolded protein binding;GO:0044183//protein binding involved…
CL10343.Contig1_All	2064	0.22	0.22	0.23	1.7	1.78	1.3	8.36961	56.8338	2.76352	1.10639e-11	Up	NA	BT104856.1/0.0/Picea glauca clone GQ02815_P02 mRNA sequence	NA	NA	NA	NA	NA
CL10347.Contig1_All	1013	1.24	1.03	1	0.07	0.12	0.35	16.4263	3.62123	-2.18146	0.00195102	Down	BAK03551.1/2.8e-133/predicted protein [Hordeum vulgare subsp. vulgare]	XM_012354799.1/0.0/Saprolegnia parasitica CBS 223.65 guanine nucleotide-binding protein subunit beta-2-like 1 partial mRNA	sp|P25387|GBLP_CHLRE/1.3e-122/Guanine nucleotide-binding protein subunit beta-like protein OS=Chlamydomonas reinhardtii GN=GBLP PE=2 SV=1	ccp:CHC_T00008875001/4.8e-130/receptor for activated protein kinase C; K14753 guanine nucleotide-binding protein subunit beta-2-like 1 protein	Hs5174447/2.1e-131/[T] KOG0279 G protein beta subunit-like protein	PS00678/-/Trp-Asp (WD) repeats signature.	NA
CL10347.Contig2_All	1115	1.39	1.47	1.15	0.41	0.32	0.2	22.9302	5.91678	-1.95436	0.000590918	Down	BAK03551.1/6.5e-139/predicted protein [Hordeum vulgare subsp. vulgare]	AK108115.1/0.0/Oryza sativa Japonica Group cDNA clone:002-139-C04, full insert sequence	sp|P25387|GBLP_CHLRE/1.3e-128/Guanine nucleotide-binding protein subunit beta-like protein OS=Chlamydomonas reinhardtii GN=GBLP PE=2 SV=1	olu:OSTLU_48240/5.0e-136/RACK1B; Receptor of activated protein kinase C 1B, component of 40S small ribosomal subunit; K14753 guanine nucleotide-binding protein subunit beta-2-like 1 protein	Hs5174447/7.4e-138/[T] KOG0279 G protein beta subunit-like protein	PS50082/13.449/Trp-Asp (WD) repeats profile.	NA
CL10347.Contig3_All	1085	1.27	1.36	1.24	0.36	0.11	0.32	21.626	4.93172	-2.1326	0.000331224	Down	BAK03551.1/5.9e-137/predicted protein [Hordeum vulgare subsp. vulgare]	AK108115.1/0.0/Oryza sativa Japonica Group cDNA clone:002-139-C04, full insert sequence	sp|P25387|GBLP_CHLRE/2.6e-129/Guanine nucleotide-binding protein subunit beta-like protein OS=Chlamydomonas reinhardtii GN=GBLP PE=2 SV=1	olu:OSTLU_19794/2.2e-133/RACK1A; Receptor of activated protein kinase C 1A, component of 40S small ribosomal subunit; K14753 guanine nucleotide-binding protein subunit beta-2-like 1 protein	Hs5174447/5.1e-136/[T] KOG0279 G protein beta subunit-like protein	SM00320/5.8E-8/WD40 repeats	NA
CL1035.Contig4_All	6812	2.04	1.32	1.89	0.54	1.05	0.29	198.383	80.6727	-1.29814	0.0406695	Down	XP_006444090.1/0.0e+00/hypothetical protein CICLE_v10018975mg [Citrus clementina] >XP_006479735.1 PREDICTED: DNA repair helicase UVH6 [Citrus sinensis] >ESR57330.1 hypothetical protein CICLE_v10018975mg [Citrus clementina] >KDO68760.1 hypothetical protein CISIN_1g004358mg [Citrus sinensis]	XM_006479672.2/0.0/PREDICTED: Citrus sinensis DNA repair helicase UVH6 (LOC102618714), mRNA	sp|Q8W4M7|ERCC2_ARATH/0.0e+00/DNA repair helicase XPD OS=Arabidopsis thaliana GN=XPD PE=1 SV=1	cit:102618714/0.0e+00/DNA repair helicase UVH6; K10844 DNA excision repair protein ERCC-2 [EC:3.6.4.12]	At1g03190/0.0e+00/[KL] KOG1131 RNA polymerase II transcription initiation/nucleotide excision repair factor TFIIH, 5'-3' helicase subunit RAD3	PTHR13161:SF15/7.6E-131/--	biological_process:GO:0006289//nucleotide-excision repair;cellular_component:GO:0005634//nucleus;molecular_function:GO:0003677//DNA binding;GO:0005524//ATP binding;GO:0004003//ATP-dependent DNA helicase activity;
CL10354.Contig1_All	973	0.81	0.68	0.38	1.83	1.29	1.35	10.0518	23.8128	1.24428	0.0255807	Up	OIV94513.1/2.9e-90/hypothetical protein TanjilG_25575 [Lupinus angustifolius]	XM_013766875.1/0.0/PREDICTED: Brassica oleracea var. oleracea ADP-ribosylation factor 1 (LOC106328435), mRNA	sp|O48920|ARF_VIGUN/8.1e-90/ADP-ribosylation factor OS=Vigna unguiculata GN=ARF PE=2 SV=3	nto:104119864/3.0e-89/ADP-ribosylation factor 2 isoform X1; K07937 ADP-ribosylation factor 1	SPBC4F6.18c/2.5e-89/[U] KOG0070 GTP-binding ADP-ribosylation factor Arf1	PR00328/1.6E-19/GTP-binding SAR1 protein signature	NA
CL10355.Contig1_All	3444	0.83	0.65	0.77	2.69	2.78	2.28	43.0107	156.745	1.86566	2.93334e-18	Up	XP_006470767.1/7.1e-168/PREDICTED: TMV resistance protein N-like [Citrus sinensis]	XM_006470704.2/0.0/PREDICTED: Citrus sinensis TMV resistance protein N-like (LOC102621748), mRNA	sp|Q40392|TMVRN_NICGU/9.9e-82/TMV resistance protein N OS=Nicotiana glutinosa GN=N PE=1 SV=1	pavi:110747480/2.8e-76/TMV resistance protein N-like; K19613 leucine-rich repeat protein SHOC2	At4g12010/3.0e-97/[VT] LSE0039 A Disease resistance protein (TIR-NBS-LRR class)	PTHR11017:SF162/3.6E-108/--	biological_process:GO:0007165//signal transduction;molecular_function:GO:0043531//ADP binding;
CL10358.Contig3_All	3422	0.44	0.64	0.6	0.11	0.25	0.1	31.2165	9.64906	-1.69385	0.00122134	Down	XP_017984643.1/1.9e-189/PREDICTED: putative disease resistance RPP13-like protein 1 [Theobroma cacao] >XP_017984644.1 PREDICTED: putative disease resistance RPP13-like protein 1 [Theobroma cacao]	XM_022039272.1/0.0/PREDICTED: Carica papaya putative disease resistance protein At3g14460 (LOC110812484), transcript variant X4, mRNA	sp|Q7XBQ9|RGA2_SOLBU/1.7e-41/Disease resistance protein RGA2 OS=Solanum bulbocastanum GN=RGA2 PE=1 SV=1	egr:104435249/3.1e-96/putative disease resistance protein At3g14460; K19613 leucine-rich repeat protein SHOC2	At1g69550/2.9e-23/[VT] LSE0039 A Disease resistance protein (TIR-NBS-LRR class)	PTHR23155/6.8E-82/--	NA
CL10358.Contig5_All	3748	0.54	0.35	0.17	0.83	0.89	0.51	22.8008	48.1438	1.07827	0.0351419	Up	XP_017984643.1/3.6e-189/PREDICTED: putative disease resistance RPP13-like protein 1 [Theobroma cacao] >XP_017984644.1 PREDICTED: putative disease resistance RPP13-like protein 1 [Theobroma cacao]	XM_022039272.1/0.0/PREDICTED: Carica papaya putative disease resistance protein At3g14460 (LOC110812484), transcript variant X4, mRNA	sp|Q7XBQ9|RGA2_SOLBU/1.9e-41/Disease resistance protein RGA2 OS=Solanum bulbocastanum GN=RGA2 PE=1 SV=1	egr:104435249/5.8e-96/putative disease resistance protein At3g14460; K19613 leucine-rich repeat protein SHOC2	At1g69550/2.6e-17/[VT] LSE0039 A Disease resistance protein (TIR-NBS-LRR class)	PTHR23155/5.2E-84/--	NA
CL10364.Contig2_All	1736	0.84	0.98	0.75	0.37	0.31	0.43	23.4302	10.7498	-1.12406	0.0357199	Down	NA	NA	NA	NA	NA	NA	NA
CL10371.Contig1_All	1322	0.18	0.23	0.01	2.06	2.69	2.24	3.34242	51.2485	3.93854	5.12907e-13	Up	XP_019241385.1/2.6e-09/PREDICTED: cysteine-rich and transmembrane domain-containing protein A-like [Nicotiana attenuata]	NA	NA	NA	NA	PF12734/1.8E-8/Cysteine-rich TM module stress tolerance	cellular_component:GO:0016021//integral component of membrane;
CL10371.Contig2_All	901	0.54	0.28	0.41	2.35	1.71	1.78	6.36567	28.0304	2.13861	5.06784e-05	Up	OTG07871.1/1.3e-07/hypothetical protein HannXRQ_Chr11g0335361 [Helianthus annuus]	NA	NA	NA	NA	PF12734/1.3E-8/Cysteine-rich TM module stress tolerance	biological_process:GO:0003006//developmental process involved in reproduction;cellular_component:GO:0005886//plasma membrane;
CL10371.Contig3_All	1012	0.47	0	0	1.47	1.74	1.86	3.20515	27.2429	3.08742	1.69018e-05	Up	XP_006481354.1/2.8e-08/PREDICTED: cysteine-rich and transmembrane domain-containing protein A-like isoform X1 [Citrus sinensis] >XP_006481356.1 PREDICTED: cysteine-rich and transmembrane domain-containing protein A-like isoform X1 [Citrus sinensis]	NA	NA	NA	NA	PF12734/1.1E-8/Cysteine-rich TM module stress tolerance	NA
CL10372.Contig1_All	838	1.84	2.87	1.61	0.08	0.34	0.26	26.5372	3.41341	-2.95873	2.95e-06	Down	XP_021686173.1/2.7e-36/DNA replication licensing factor MCM6 [Hevea brasiliensis] >XP_021686174.1 DNA replication licensing factor MCM6 [Hevea brasiliensis]	XM_002299343.2/0.0/Populus trichocarpa hypothetical protein (POPTR_0001s12380g) mRNA, complete cds	sp|F4KAB8|MCM6_ARATH/5.4e-34/DNA replication licensing factor MCM6 OS=Arabidopsis thaliana GN=MCM6 PE=1 SV=1	hbr:110669033/4.0e-37/DNA replication licensing factor MCM6; K02542 DNA replication licensing factor MCM6 [EC:3.6.4.12]	SPBC211.04c/2.8e-12/[L] KOG0480 DNA replication licensing factor, MCM6 component	NA	biological_process:GO:0006270//DNA replication initiation;cellular_component:GO:0005634//nucleus;GO:0042555//MCM complex;molecular_function:GO:0003677//DNA binding;GO:0005524//ATP binding;GO:0003678//DNA helicase activity;
CL1038.Contig1_All	1394	2.03	1.19	2.28	8.24	7.6	7.54	41.9243	185.155	2.14288	2.87641e-21	Up	XP_006433612.1/8.9e-45/hypothetical protein CICLE_v10001990mg [Citrus clementina] >ESR46852.1 hypothetical protein CICLE_v10001990mg [Citrus clementina]	XM_006433549.1/0.0/Citrus clementina hypothetical protein (CICLE_v10001990mg) mRNA, complete cds	sp|Q9STX1|ACBP3_ARATH/1.6e-22/Acyl-CoA-binding domain-containing protein 3 OS=Arabidopsis thaliana GN=ACBP3 PE=1 SV=1	csv:101215672/1.5e-09/nuclear pore complex protein NUP62; K14306 nuclear pore complex protein Nup62	At4g24230/3.7e-22/[I] KOG0817 Acyl-CoA-binding protein	PTHR23310:SF14/6.1E-23/--	molecular_function:GO:0000062//fatty-acyl-CoA binding;
CL1038.Contig2_All	1946	3.87	3.83	5.65	13.73	15.28	13.16	143.375	475.83	1.73066	5.5548e-30	Up	XP_006472278.1/2.6e-74/PREDICTED: acyl-CoA-binding domain-containing protein 3-like isoform X2 [Citrus sinensis] >XP_006472279.1 PREDICTED: acyl-CoA-binding domain-containing protein 3-like isoform X2 [Citrus sinensis]	JX866763.1/0.0/Vernicia fordii acyl-CoA binding protein 3B (ACBP3B) mRNA, complete cds	sp|Q9STX1|ACBP3_ARATH/7.2e-37/Acyl-CoA-binding domain-containing protein 3 OS=Arabidopsis thaliana GN=ACBP3 PE=1 SV=1	csv:101215672/2.8e-09/nuclear pore complex protein NUP62; K14306 nuclear pore complex protein Nup62	At4g24230/1.7e-36/[I] KOG0817 Acyl-CoA-binding protein	PR00689/2.0E-6/Acyl-coA-binding protein signature	molecular_function:GO:0000062//fatty-acyl-CoA binding;
CL1038.Contig3_All	3942	1.01	1.06	1.27	6.17	6.7	6.31	73.9334	448.422	2.60056	2.12991e-79	Up	XP_006433612.1/1.6e-46/hypothetical protein CICLE_v10001990mg [Citrus clementina] >ESR46852.1 hypothetical protein CICLE_v10001990mg [Citrus clementina]	XM_006433549.1/0.0/Citrus clementina hypothetical protein (CICLE_v10001990mg) mRNA, complete cds	sp|Q9STX1|ACBP3_ARATH/4.5e-22/Acyl-CoA-binding domain-containing protein 3 OS=Arabidopsis thaliana GN=ACBP3 PE=1 SV=1	csv:101215672/4.3e-09/nuclear pore complex protein NUP62; K14306 nuclear pore complex protein Nup62	At4g24230/1.1e-21/[I] KOG0817 Acyl-CoA-binding protein	PTHR23310:SF14/6.1E-23/--	molecular_function:GO:0000062//fatty-acyl-CoA binding;
CL1038.Contig4_All	3309	1.21	1.18	1.23	7.38	5.82	6.37	67.2722	381.916	2.50517	7.41207e-57	Up	XP_006472278.1/2.6e-74/PREDICTED: acyl-CoA-binding domain-containing protein 3-like isoform X2 [Citrus sinensis] >XP_006472279.1 PREDICTED: acyl-CoA-binding domain-containing protein 3-like isoform X2 [Citrus sinensis]	XM_006433549.1/0.0/Citrus clementina hypothetical protein (CICLE_v10001990mg) mRNA, complete cds	sp|Q9STX1|ACBP3_ARATH/4.2e-37/Acyl-CoA-binding domain-containing protein 3 OS=Arabidopsis thaliana GN=ACBP3 PE=1 SV=1	csv:101215672/3.6e-09/nuclear pore complex protein NUP62; K14306 nuclear pore complex protein Nup62	At4g24230/9.8e-37/[I] KOG0817 Acyl-CoA-binding protein	PTHR23310:SF14/3.1E-45/--	molecular_function:GO:0000062//fatty-acyl-CoA binding;
CL1038.Contig5_All	2415	0.19	0.45	0.32	3.18	2.68	3.47	12.9993	130.867	3.3316	9.75339e-26	Up	XP_006433612.1/2.0e-47/hypothetical protein CICLE_v10001990mg [Citrus clementina] >ESR46852.1 hypothetical protein CICLE_v10001990mg [Citrus clementina]	XM_006433549.1/0.0/Citrus clementina hypothetical protein (CICLE_v10001990mg) mRNA, complete cds	sp|Q9STX1|ACBP3_ARATH/2.8e-22/Acyl-CoA-binding domain-containing protein 3 OS=Arabidopsis thaliana GN=ACBP3 PE=1 SV=1	csv:101215672/2.7e-09/nuclear pore complex protein NUP62; K14306 nuclear pore complex protein Nup62	At4g24230/6.5e-22/[I] KOG0817 Acyl-CoA-binding protein	PTHR23310:SF14/6.1E-23/--	molecular_function:GO:0000062//fatty-acyl-CoA binding;
CL1038.Contig6_All	1603	2.7	1.88	0.97	7.08	4.22	7.48	49.7629	171.536	1.78536	4.22169e-07	Up	XP_006472278.1/1.2e-74/PREDICTED: acyl-CoA-binding domain-containing protein 3-like isoform X2 [Citrus sinensis] >XP_006472279.1 PREDICTED: acyl-CoA-binding domain-containing protein 3-like isoform X2 [Citrus sinensis]	JX866763.1/0.0/Vernicia fordii acyl-CoA binding protein 3B (ACBP3B) mRNA, complete cds	sp|Q9STX1|ACBP3_ARATH/2.0e-37/Acyl-CoA-binding domain-containing protein 3 OS=Arabidopsis thaliana GN=ACBP3 PE=1 SV=1	csv:101215672/1.8e-09/nuclear pore complex protein NUP62; K14306 nuclear pore complex protein Nup62	At4g24230/4.7e-37/[I] KOG0817 Acyl-CoA-binding protein	PTHR23310:SF14/3.1E-45/--	molecular_function:GO:0000062//fatty-acyl-CoA binding;
CL10383.Contig2_All	1366	3.04	3.99	2.5	9.05	8.42	8.63	70.587	202.357	1.51943	4.28879e-15	Up	XP_006425293.1/5.2e-146/hypothetical protein CICLE_v10025699mg [Citrus clementina] >ESR38533.1 hypothetical protein CICLE_v10025699mg [Citrus clementina]	XM_006425230.1/0.0/Citrus clementina hypothetical protein (CICLE_v10025699mg) mRNA, complete cds	sp|P27450|CST_ARATH/1.7e-114/Probable serine/threonine-protein kinase CST OS=Arabidopsis thaliana GN=CST PE=1 SV=2	soe:110788370/5.9e-123/probable serine/threonine-protein kinase PIX13; K04733 interleukin-1 receptor-associated kinase 4 [EC:2.7.11.1]	At4g35600/3.1e-114/[T] KOG1187 Serine/threonine protein kinase	PS50011/38.068/Protein kinase domain profile.	molecular_function:GO:0004674//protein serine/threonine kinase activity;GO:0005524//ATP binding;
CL10383.Contig3_All	1681	1.13	1.02	1.11	3.45	4.19	4.06	30.0988	112.603	1.90346	1.20527e-14	Up	XP_006425293.1/2.8e-109/hypothetical protein CICLE_v10025699mg [Citrus clementina] >ESR38533.1 hypothetical protein CICLE_v10025699mg [Citrus clementina]	XM_018987836.1/0.0/PREDICTED: Juglans regia probable serine/threonine-protein kinase Cx32, chloroplastic (LOC109007930), mRNA	sp|P27450|CST_ARATH/7.0e-89/Probable serine/threonine-protein kinase CST OS=Arabidopsis thaliana GN=CST PE=1 SV=2	soe:110788370/2.6e-96/probable serine/threonine-protein kinase PIX13; K04733 interleukin-1 receptor-associated kinase 4 [EC:2.7.11.1]	At4g35600/1.6e-88/[T] KOG1187 Serine/threonine protein kinase	PF00069/2.4E-40/Protein kinase domain	molecular_function:GO:0004674//protein serine/threonine kinase activity;GO:0005524//ATP binding;
CL10383.Contig4_All	1658	0.65	0.41	0.76	1.89	1.65	1.47	16.5828	46.9364	1.50101	0.000128047	Up	XP_004234513.1/2.1e-61/PREDICTED: probable serine/threonine-protein kinase Cx32, chloroplastic [Solanum lycopersicum]	XM_018987836.1/0.0/PREDICTED: Juglans regia probable serine/threonine-protein kinase Cx32, chloroplastic (LOC109007930), mRNA	sp|Q9SII6|PIX13_ARATH/5.0e-55/Probable serine/threonine-protein kinase PIX13 OS=Arabidopsis thaliana GN=PIX13 PE=1 SV=2	soe:110788370/2.0e-56/probable serine/threonine-protein kinase PIX13; K04733 interleukin-1 receptor-associated kinase 4 [EC:2.7.11.1]	At2g17220/1.2e-54/[T] KOG1187 Serine/threonine protein kinase	PTHR27001/1.7E-100/--	biological_process:GO:0009838//abscission;GO:0006468//protein phosphorylation;GO:0007166//cell surface receptor signaling pathway;cellular_component:GO:0005886//plasma membrane;molecular_function:GO:0004674//protein serine/threonine kinase activity;GO:0005524//ATP binding;GO:0004675//transmembrane receptor protein serine/threonine kinase activity;
CL10383.Contig5_All	2018	1.02	1.5	1.39	3.65	3.93	4.12	43.5637	136.474	1.64742	1.24377e-13	Up	KDO71464.1/1.9e-80/hypothetical protein CISIN_1g017177mg [Citrus sinensis]	XM_018987836.1/0.0/PREDICTED: Juglans regia probable serine/threonine-protein kinase Cx32, chloroplastic (LOC109007930), mRNA	sp|Q9SII6|PIX13_ARATH/9.6e-69/Probable serine/threonine-protein kinase PIX13 OS=Arabidopsis thaliana GN=PIX13 PE=1 SV=2	soe:110788370/4.5e-71/probable serine/threonine-protein kinase PIX13; K04733 interleukin-1 receptor-associated kinase 4 [EC:2.7.11.1]	At2g17220/2.2e-68/[T] KOG1187 Serine/threonine protein kinase	PS50011/28.782/Protein kinase domain profile.	molecular_function:GO:0004674//protein serine/threonine kinase activity;GO:0005524//ATP binding;
CL10383.Contig6_All	2104	2.64	2.96	3.03	8.35	8.27	8.34	100.095	305.591	1.61023	1.36947e-32	Up	XP_006425293.1/4.9e-111/hypothetical protein CICLE_v10025699mg [Citrus clementina] >ESR38533.1 hypothetical protein CICLE_v10025699mg [Citrus clementina]	XM_018987836.1/0.0/PREDICTED: Juglans regia probable serine/threonine-protein kinase Cx32, chloroplastic (LOC109007930), mRNA	sp|P27450|CST_ARATH/1.2e-90/Probable serine/threonine-protein kinase CST OS=Arabidopsis thaliana GN=CST PE=1 SV=2	soe:110788370/9.2e-99/probable serine/threonine-protein kinase PIX13; K04733 interleukin-1 receptor-associated kinase 4 [EC:2.7.11.1]	At4g35600/2.8e-90/[T] KOG1187 Serine/threonine protein kinase	PTHR27001:SF32/4.0E-159/--	biological_process:GO:0006468//protein phosphorylation;GO:0007166//cell surface receptor signaling pathway;cellular_component:GO:0005886//plasma membrane;molecular_function:GO:0004674//protein serine/threonine kinase activity;GO:0005524//ATP binding;GO:0004675//transmembrane receptor protein serine/threonine kinase activity;
CL10384.Contig1_All	2201	27.22	27.99	26.59	11.29	11.86	11.2	996.221	441.366	-1.17449	4.06805e-66	Down	XP_006449566.1/3.1e-193/hypothetical protein CICLE_v10014125mg [Citrus clementina] >ESR62806.1 hypothetical protein CICLE_v10014125mg [Citrus clementina]	XM_006449503.1/0.0/Citrus clementina hypothetical protein (CICLE_v10014125mg) mRNA, complete cds	sp|C0LGE0|Y1765_ARATH/3.3e-139/Probable LRR receptor-like serine/threonine-protein kinase At1g07650 OS=Arabidopsis thaliana GN=At1g07650 PE=1 SV=1	pavi:110764626/1.3e-143/probable LRR receptor-like serine/threonine-protein kinase At1g07650; K04733 interleukin-1 receptor-associated kinase 4 [EC:2.7.11.1]	At1g53440/1.0e-138/[T] LSE0002 A Receptor protein kinase containing LRR repeats	PF07714/6.1E-51/Protein tyrosine kinase	cellular_component:GO:0016021//integral component of membrane;molecular_function:GO:0005524//ATP binding;GO:0004672//protein kinase activity;
CL10388.Contig10_All	2323	13.22	14.03	15.62	44.96	43.8	46.57	552.371	1839.8	1.73584	1.46165e-160	Up	XP_015382362.1/3.3e-137/PREDICTED: LOW QUALITY PROTEIN: uncharacterized protein LOC102620676 [Citrus sinensis]	NA	sp|Q8GXJ4|GLR34_ARATH/3.3e-73/Glutamate receptor 3.4 OS=Arabidopsis thaliana GN=GLR3.4 PE=2 SV=2	gra:105776368/3.2e-129/glutamate receptor 2.9-like; K05387 glutamate receptor, ionotropic, plant	At1g05200/7.8e-73/[PET] KOG1052 Glutamate-gated kainate-type ion channel receptor subunit GluR5 and related subunits	PTHR18966/3.3E-200/--	cellular_component:GO:0016021//integral component of membrane;molecular_function:GO:0004970//ionotropic glutamate receptor activity;
CL10388.Contig11_All	4024	9.97	11.68	9.16	24.5	23.55	25.95	697.803	1768.1	1.34131	1.8337e-61	Up	KDO77777.1/6.0e-227/hypothetical protein CISIN_1g002454mg [Citrus sinensis]	XM_021836778.1/0.0/PREDICTED: Hevea brasiliensis glutamate receptor 2.7-like (LOC110673642), mRNA	sp|Q8LGN0|GLR27_ARATH/4.5e-94/Glutamate receptor 2.7 OS=Arabidopsis thaliana GN=GLR2.7 PE=2 SV=3	tcc:18596748/6.7e-207/glutamate receptor 2.7; K05387 glutamate receptor, ionotropic, plant	At2g29100/1.8e-93/[PET] KOG1052 Glutamate-gated kainate-type ion channel receptor subunit GluR5 and related subunits	PF01094/6.2E-41/Receptor family ligand binding region	cellular_component:GO:0016021//integral component of membrane;molecular_function:GO:0004970//ionotropic glutamate receptor activity;
CL10388.Contig12_All	702	2.5	3.2	2.09	9.68	8.22	7.4	28.5095	94.9419	1.7356	5.89613e-10	Up	NA	NA	NA	NA	NA	NA	NA
CL10388.Contig2_All	5984	23.15	23.89	23.2	67.06	65.87	69.52	2380.6	7246.46	1.60595	0	Up	XP_015382362.1/5.1e-190/PREDICTED: LOW QUALITY PROTEIN: uncharacterized protein LOC102620676 [Citrus sinensis]	XM_021836777.1/0.0/PREDICTED: Hevea brasiliensis glutamate receptor 2.9-like (LOC110673641), mRNA	sp|Q9SHV2|GLR23_ARATH/4.7e-79/Glutamate receptor 2.3 OS=Arabidopsis thaliana GN=GLR2.3 PE=2 SV=1	tcc:18596748/4.5e-175/glutamate receptor 2.7; K05387 glutamate receptor, ionotropic, plant	At2g16670/2.4e-65/[R] KOG0017 FOG: Transposon-encoded proteins with TYA, reverse transcriptase, integrase domains in various combinations	PTHR18966/3.1E-253/--	cellular_component:GO:0016021//integral component of membrane;molecular_function:GO:0004970//ionotropic glutamate receptor activity;
CL10388.Contig3_All	4216	13.95	13.9	14.57	28.42	29.25	29.91	1006.71	2195.51	1.12491	7.80725e-122	Up	XP_015382362.1/7.8e-193/PREDICTED: LOW QUALITY PROTEIN: uncharacterized protein LOC102620676 [Citrus sinensis]	XM_021836778.1/0.0/PREDICTED: Hevea brasiliensis glutamate receptor 2.7-like (LOC110673642), mRNA	sp|Q9SHV2|GLR23_ARATH/4.5e-76/Glutamate receptor 2.3 OS=Arabidopsis thaliana GN=GLR2.3 PE=2 SV=1	tcc:18596748/7.8e-174/glutamate receptor 2.7; K05387 glutamate receptor, ionotropic, plant	At2g24710/1.0e-75/[PET] KOG1052 Glutamate-gated kainate-type ion channel receptor subunit GluR5 and related subunits	PF00497/8.6E-13/Bacterial extracellular solute-binding proteins, family 3	cellular_component:GO:0016021//integral component of membrane;molecular_function:GO:0004970//ionotropic glutamate receptor activity;
CL10388.Contig4_All	3111	12.88	12.82	13.41	51.74	50.78	51.17	680.542	2824.13	2.05305	0	Up	XP_015382362.1/1.4e-191/PREDICTED: LOW QUALITY PROTEIN: uncharacterized protein LOC102620676 [Citrus sinensis]	XM_021836778.1/0.0/PREDICTED: Hevea brasiliensis glutamate receptor 2.7-like (LOC110673642), mRNA	sp|Q9SHV2|GLR23_ARATH/5.1e-77/Glutamate receptor 2.3 OS=Arabidopsis thaliana GN=GLR2.3 PE=2 SV=1	tcc:18596748/7.5e-174/glutamate receptor 2.7; K05387 glutamate receptor, ionotropic, plant	At2g24710/1.2e-76/[PET] KOG1052 Glutamate-gated kainate-type ion channel receptor subunit GluR5 and related subunits	PF01094/3.2E-41/Receptor family ligand binding region	cellular_component:GO:0016021//integral component of membrane;molecular_function:GO:0004970//ionotropic glutamate receptor activity;
CL10388.Contig6_All	771	17.32	17.91	17.51	56.63	57.33	61.75	210.077	735.979	1.80875	6.96175e-89	Up	XP_015382362.1/5.7e-41/PREDICTED: LOW QUALITY PROTEIN: uncharacterized protein LOC102620676 [Citrus sinensis]	XM_022157954.1/0.0/PREDICTED: Helianthus annuus glutamate receptor 2.7-like (LOC110913085), mRNA	sp|Q9C5V5|GLR28_ARATH/3.5e-19/Glutamate receptor 2.8 OS=Arabidopsis thaliana GN=GLR2.8 PE=2 SV=2	tcc:18596748/5.6e-38/glutamate receptor 2.7; K05387 glutamate receptor, ionotropic, plant	At2g29110/8.2e-19/[PET] KOG1052 Glutamate-gated kainate-type ion channel receptor subunit GluR5 and related subunits	PTHR18966/1.8E-54/--	cellular_component:GO:0016021//integral component of membrane;molecular_function:GO:0004970//ionotropic glutamate receptor activity;
CL10388.Contig7_All	871	10.05	8.59	11.51	27.35	26.75	25.43	137.213	380.919	1.47307	2.91749e-29	Up	XP_015382362.1/3.8e-33/PREDICTED: LOW QUALITY PROTEIN: uncharacterized protein LOC102620676 [Citrus sinensis]	NA	sp|Q93YT1|GLR32_ARATH/8.5e-14/Glutamate receptor 3.2 OS=Arabidopsis thaliana GN=GLR3.2 PE=1 SV=2	tcc:18596748/2.2e-30/glutamate receptor 2.7; K05387 glutamate receptor, ionotropic, plant	At2g17260/1.4e-14/[PET] KOG1052 Glutamate-gated kainate-type ion channel receptor subunit GluR5 and related subunits	PTHR18966/1.6E-40/--	cellular_component:GO:0016021//integral component of membrane;molecular_function:GO:0004970//ionotropic glutamate receptor activity;
CL10388.Contig8_All	525	21.82	27.19	27.14	58.7	62.91	58.08	195.885	485.246	1.30871	2.98351e-31	Up	XP_011027731.1/8.7e-09/PREDICTED: glutamate receptor 2.9-like isoform X2 [Populus euphratica]	NA	NA	hbr:110673641/5.4e-08/glutamate receptor 2.9-like; K05387 glutamate receptor, ionotropic, plant	NA	NA	cellular_component:GO:0016021//integral component of membrane;molecular_function:GO:0004970//ionotropic glutamate receptor activity;
CL10388.Contig9_All	4025	4.03	4.24	5.14	18.56	19.34	18.03	303.999	1336.96	2.13682	1.80716e-142	Up	KDO77777.1/5.1e-226/hypothetical protein CISIN_1g002454mg [Citrus sinensis]	XM_021836778.1/0.0/PREDICTED: Hevea brasiliensis glutamate receptor 2.7-like (LOC110673642), mRNA	sp|Q8LGN0|GLR27_ARATH/2.5e-92/Glutamate receptor 2.7 OS=Arabidopsis thaliana GN=GLR2.7 PE=2 SV=3	tcc:18596748/4.8e-205/glutamate receptor 2.7; K05387 glutamate receptor, ionotropic, plant	At2g29100/7.6e-92/[PET] KOG1052 Glutamate-gated kainate-type ion channel receptor subunit GluR5 and related subunits	PF00497/6.0E-13/Bacterial extracellular solute-binding proteins, family 3	cellular_component:GO:0016021//integral component of membrane;molecular_function:GO:0004970//ionotropic glutamate receptor activity;
CL10392.Contig1_All	681	3.14	3.4	2.25	1.22	1.1	1.37	30.1542	13.7934	-1.12838	0.0181645	Down	BAJ99195.1/3.1e-91/predicted protein [Hordeum vulgare subsp. vulgare]	XM_012349466.1/0.0/Saprolegnia parasitica CBS 223.65 aconitate hydratase mRNA	sp|P49609|ACON_GRAGA/3.2e-85/Aconitate hydratase, mitochondrial OS=Gracilaria gracilis PE=3 SV=1	vcn:VOLCADRAFT_76010/1.3e-86/ach1; mitochondrial aconitate hydratase; K01681 aconitate hydratase [EC:4.2.1.3]	SPAC24C9.06c/2.7e-90/[CE] KOG0453 Aconitase/homoaconitase (aconitase superfamily)	PS00450/-/Aconitase family signature 1.	biological_process:GO:0006099//tricarboxylic acid cycle;cellular_component:GO:0005739//mitochondrion;molecular_function:GO:0003994//aconitate hydratase activity;GO:0046872//metal ion binding;GO:0051539//4 iron, 4 sulfur cluster binding;
CL10392.Contig2_All	2742	2.43	2.78	2.1	0.61	0.72	0.62	110.621	32.1037	-1.78482	2.16582e-12	Down	BAJ99195.1/0.0e+00/predicted protein [Hordeum vulgare subsp. vulgare]	AK367992.1/0.0/Hordeum vulgare subsp. vulgare mRNA for predicted protein, complete cds, clone: NIASHv2065P18	sp|P49609|ACON_GRAGA/1.1e-306/Aconitate hydratase, mitochondrial OS=Gracilaria gracilis PE=3 SV=1	csl:COCSUDRAFT_27212/2.1e-305/aconitate hydratase; K01681 aconitate hydratase [EC:4.2.1.3]	YLR304c/0.0e+00/[CE] KOG0453 Aconitase/homoaconitase (aconitase superfamily)	PTHR11670:SF30/0.0/--	biological_process:GO:0006099//tricarboxylic acid cycle;cellular_component:GO:0005739//mitochondrion;molecular_function:GO:0003994//aconitate hydratase activity;GO:0046872//metal ion binding;GO:0051539//4 iron, 4 sulfur cluster binding;
CL10392.Contig3_All	1753	3.1	3.36	3.14	1.45	1.25	1.24	91.9139	40.3428	-1.18797	1.33592e-06	Down	BAJ99195.1/1.3e-221/predicted protein [Hordeum vulgare subsp. vulgare]	FR694796.1/0.0/Polytomella sp. Pringsheim 198.80 partial mRNA for mitochondrial aconitate hydratase (aco gene)	sp|P49609|ACON_GRAGA/7.5e-203/Aconitate hydratase, mitochondrial OS=Gracilaria gracilis PE=3 SV=1	cre:CHLREDRAFT_129025/1.4e-206/ACH1; aconitate hydratase; K01681 aconitate hydratase [EC:4.2.1.3]	SPAC24C9.06c/1.2e-211/[CE] KOG0453 Aconitase/homoaconitase (aconitase superfamily)	PF00694/4.2E-41/Aconitase C-terminal domain	biological_process:GO:0006099//tricarboxylic acid cycle;cellular_component:GO:0005739//mitochondrion;molecular_function:GO:0003994//aconitate hydratase activity;GO:0046872//metal ion binding;GO:0051539//4 iron, 4 sulfur cluster binding;
CL10395.Contig2_All	1650	0.43	0.22	0	0	0	0	4.66376	0.795596	-2.55139	0.0254834	Down	XP_011080965.1/3.1e-20/uncharacterized protein LOC105164099 [Sesamum indicum] >XP_011080967.1 uncharacterized protein LOC105164099 [Sesamum indicum] >XP_011080968.1 uncharacterized protein LOC105164099 [Sesamum indicum]	NA	NA	sind:105164099/4.6e-21/uncharacterized protein LOC105164099; K07447 putative holliday junction resolvase [EC:3.1.-.-]	At3g52910/4.2e-20/[S] LSE0397 A Uncharacterized protein	PTHR33317:SF1/6.5E-16/--	biological_process:GO:0006364//rRNA processing;
CL10395.Contig3_All	1939	1.15	2.62	1.72	0.82	0.47	0.44	57.3002	19.3089	-1.56928	0.000540385	Down	XP_011080965.1/2.5e-21/uncharacterized protein LOC105164099 [Sesamum indicum] >XP_011080967.1 uncharacterized protein LOC105164099 [Sesamum indicum] >XP_011080968.1 uncharacterized protein LOC105164099 [Sesamum indicum]	NA	NA	sind:105164099/3.7e-22/uncharacterized protein LOC105164099; K07447 putative holliday junction resolvase [EC:3.1.-.-]	At3g52910/7.5e-21/[S] LSE0397 A Uncharacterized protein	PF03652/2.7E-8/Holliday junction resolvase	biological_process:GO:0000967//rRNA 5'-end processing;
CL10399.Contig6_All	506	0.62	1.38	1.71	3.63	3.13	4.32	8.88741	27.6754	1.63877	0.002094	Up	XP_006399153.1/1.1e-08/hypothetical protein EUTSA_v10014897mg [Eutrema salsugineum] >ABY86896.1 LEA-like protein [Eutrema halophilum] >ESQ40606.1 hypothetical protein EUTSA_v10014897mg [Eutrema salsugineum]	NA	NA	NA	NA	NA	biological_process:GO:0009793//embryo development ending in seed dormancy;
CL10401.Contig2_All	3607	5.56	5.69	5.57	1.93	2.44	1.88	339.353	133.777	-1.34295	2.48987e-23	Down	BAJ99339.1/0.0e+00/predicted protein [Hordeum vulgare subsp. vulgare]	AK110177.1/0.0/Oryza sativa Japonica Group cDNA clone:002-161-G12, full insert sequence	sp|P83970|PMA1_WHEAT/4.9e-132/Plasma membrane ATPase OS=Triticum aestivum GN=ha1 PE=2 SV=1	rcu:8278620/2.8e-132/plasma membrane ATPase 4; K01535 H+-transporting ATPase [EC:3.6.3.6]	YGL008c/9.1e-246/[P] KOG0205 Plasma membrane H+-transporting ATPase	PF00690/3.0E-9/Cation transporter/ATPase, N-terminus	biological_process:GO:0006754//ATP biosynthetic process;cellular_component:GO:0016021//integral component of membrane;molecular_function:GO:0005524//ATP binding;GO:0008553//hydrogen-exporting ATPase activity, phosphorylative mechanism;
CL10401.Contig4_All	3030	9.43	8.88	8.58	4.59	3.92	4.04	454.98	224.507	-1.01904	4.31023e-21	Down	BAJ99339.1/0.0e+00/predicted protein [Hordeum vulgare subsp. vulgare]	AK368136.1/0.0/Hordeum vulgare subsp. vulgare mRNA for predicted protein, complete cds, clone: NIASHv2068M20	sp|Q9SH76|PMA6_ARATH/1.8e-127/ATPase 6, plasma membrane-type OS=Arabidopsis thaliana GN=AHA6 PE=2 SV=1	jcu:105633471/6.1e-128/LOW QUALITY PROTEIN: ATPase 8, plasma membrane-type; K01535 H+-transporting ATPase [EC:3.6.3.6]	YGL008c/1.1e-239/[P] KOG0205 Plasma membrane H+-transporting ATPase	PTHR24093:SF271/0.0/--	NA
CL10403.Contig2_All	707	2.17	2.66	1.47	5.18	6.1	5.45	22.9593	62.6345	1.44788	1.63865e-05	Up	XP_018830556.1/5.2e-25/PREDICTED: tropinone reductase homolog At5g06060-like [Juglans regia] >XP_018830557.1 PREDICTED: tropinone reductase homolog At5g06060-like [Juglans regia]	NA	sp|Q9ZW18|SAG13_ARATH/4.3e-24/Senescence-associated protein 13 OS=Arabidopsis thaliana GN=SAG13 PE=1 SV=1	thj:104800698/2.9e-25/tropinone reductase homolog At2g29290-like isoform X2; K08081 tropinone reductase I [EC:1.1.1.206]	At2g29350/1.0e-23/[R] KOG0725 Reductases with broad range of substrate specificities	PTHR24322:SF623/3.8E-27/--	NA
CL10405.Contig1_All	1678	4.03	4.51	4.08	1.66	1.36	1.96	114.972	48.4331	-1.24721	7.81442e-08	Down	XP_006482328.1/5.7e-195/PREDICTED: probable inactive ATP-dependent zinc metalloprotease FTSHI 3, chloroplastic [Citrus sinensis]	XM_006482265.2/0.0/PREDICTED: Citrus sinensis probable inactive ATP-dependent zinc metalloprotease FTSHI 3, chloroplastic (LOC102607258), mRNA	sp|Q9M895|FTSI3_ARATH/1.5e-179/Probable inactive ATP-dependent zinc metalloprotease FTSHI 3, chloroplastic OS=Arabidopsis thaliana GN=FTSHI3 PE=1 SV=1	cit:102613766/1.1e-78/ATP-dependent zinc metalloprotease FTSH 6, chloroplastic-like; K03798 cell division protease FtsH [EC:3.4.24.-]	At3g02450/3.4e-179/[O] KOG0731 AAA+-type ATPase containing the peptidase M41 domain	PS00674/-/AAA-protein family signature.	cellular_component:GO:0016021//integral component of membrane;molecular_function:GO:0004222//metalloendopeptidase activity;GO:0005524//ATP binding;GO:0008270//zinc ion binding;
CL10405.Contig2_All	2804	6.64	6.45	6.74	2.11	2.52	2.71	309.498	120.946	-1.35557	9.20173e-23	Down	XP_006482328.1/1.3e-273/PREDICTED: probable inactive ATP-dependent zinc metalloprotease FTSHI 3, chloroplastic [Citrus sinensis]	XM_006482265.2/0.0/PREDICTED: Citrus sinensis probable inactive ATP-dependent zinc metalloprotease FTSHI 3, chloroplastic (LOC102607258), mRNA	sp|Q9M895|FTSI3_ARATH/1.7e-220/Probable inactive ATP-dependent zinc metalloprotease FTSHI 3, chloroplastic OS=Arabidopsis thaliana GN=FTSHI3 PE=1 SV=1	cit:102613766/1.8e-78/ATP-dependent zinc metalloprotease FTSH 6, chloroplastic-like; K03798 cell division protease FtsH [EC:3.4.24.-]	At3g02450/3.9e-220/[O] KOG0731 AAA+-type ATPase containing the peptidase M41 domain	PS00674/-/AAA-protein family signature.	cellular_component:GO:0016021//integral component of membrane;molecular_function:GO:0004222//metalloendopeptidase activity;GO:0005524//ATP binding;GO:0008270//zinc ion binding;
CL10407.Contig1_All	1741	1.86	2.26	2.3	1.02	0.94	0.97	60.439	29.5507	-1.03229	0.000941624	Down	XP_006476844.1/5.9e-155/PREDICTED: FKBP12-interacting protein of 37 kDa [Citrus sinensis]	XM_006476781.2/0.0/PREDICTED: Citrus sinensis FKBP12-interacting protein of 37 kDa (LOC102611384), mRNA	sp|Q9ZSZ8|FIP37_ARATH/1.2e-115/FKBP12-interacting protein of 37 kDa OS=Arabidopsis thaliana GN=FIP37 PE=1 SV=1	sbi:8054971/2.3e-07/GRIP and coiled-coil domain-containing protein 2 isoform X2; K20478 golgin subfamily B member 1	At3g54170/2.8e-115/[A] KOG2991 Splicing regulator	PF17098/6.7E-27/Pre-mRNA-splicing regulator WTAP	biological_process:GO:0000381//regulation of alternative mRNA splicing, via spliceosome;GO:0080009//mRNA methylation;cellular_component:GO:0005634//nucleus;
CL10408.Contig1_All	710	2.03	1.93	2.06	0.36	0.44	0.35	21.3386	4.89431	-2.12429	0.000252142	Down	XP_012209371.1/1.8e-49/hypothetical protein SPRG_14840 [Saprolegnia parasitica CBS 223.65] >KDO19932.1 hypothetical protein SPRG_14840 [Saprolegnia parasitica CBS 223.65]	NA	sp|O82574|RL21_CYAPA/5.4e-43/60S ribosomal protein L21 OS=Cyanophora paradoxa GN=RPL21 PE=2 SV=1	bvg:104906748/5.9e-42/60S ribosomal protein L21-1; K02889 large subunit ribosomal protein L21e	SPAC959.08/8.8e-60/[J] KOG1732 60S ribosomal protein L21	NA	biological_process:GO:0006412//translation;cellular_component:GO:0005840//ribosome;molecular_function:GO:0003735//structural constituent of ribosome;
CL10408.Contig2_All	701	3.22	2.58	2.72	0.54	0.18	0.53	29.9262	5.3398	-2.48655	4.15955e-06	Down	XP_012209371.1/3.7e-47/hypothetical protein SPRG_14840 [Saprolegnia parasitica CBS 223.65] >KDO19932.1 hypothetical protein SPRG_14840 [Saprolegnia parasitica CBS 223.65]	NA	sp|Q43291|RL211_ARATH/6.5e-41/60S ribosomal protein L21-1 OS=Arabidopsis thaliana GN=RPL21A PE=2 SV=2	han:110937790/1.0e-41/60S ribosomal protein L21-1-like; K02889 large subunit ribosomal protein L21e	SPAC959.08/1.8e-57/[J] KOG1732 60S ribosomal protein L21	NA	biological_process:GO:0006412//translation;cellular_component:GO:0005840//ribosome;molecular_function:GO:0003735//structural constituent of ribosome;
CL10409.Contig1_All	869	1.48	1.86	1.47	0.7	0.72	0.23	21.0593	7.87384	-1.41932	0.0198392	Down	OSX71617.1/3.5e-79/hypothetical protein BU14_0518s0009 [Porphyra umbilicalis]	BT102161.1/0.0/Picea glauca clone GQ0167_L03 mRNA sequence	sp|Q94KU1|6PGD1_SPIOL/9.9e-55/6-phosphogluconate dehydrogenase, decarboxylating 1 OS=Spinacia oleracea GN=pgdC PE=1 SV=1	gsl:Gasu_15770/8.7e-80/6-phosphogluconate dehydrogenase; K00033 6-phosphogluconate dehydrogenase [EC:1.1.1.44 1.1.1.343]	YGR256w/2.0e-106/[G] KOG2653 6-phosphogluconate dehydrogenase	PS00461/-/6-phosphogluconate dehydrogenase signature.	biological_process:GO:0006098//pentose-phosphate shunt;GO:0019521//D-gluconate metabolic process;molecular_function:GO:0004616//phosphogluconate dehydrogenase (decarboxylating) activity;
CL10409.Contig2_All	533	3.43	2.67	3.36	0.37	0.48	0.6	24.1847	4.61374	-2.39009	3.13842e-05	Down	XP_005707591.1/3.4e-37/6-phosphogluconate dehydrogenase [Galdieria sulphuraria] >EME31071.1 6-phosphogluconate dehydrogenase [Galdieria sulphuraria]	NA	sp|Q94KU1|6PGD1_SPIOL/2.4e-27/6-phosphogluconate dehydrogenase, decarboxylating 1 OS=Spinacia oleracea GN=pgdC PE=1 SV=1	gsl:Gasu_15770/5.1e-38/6-phosphogluconate dehydrogenase; K00033 6-phosphogluconate dehydrogenase [EC:1.1.1.44 1.1.1.343]	YGR256w/1.5e-56/[G] KOG2653 6-phosphogluconate dehydrogenase	NA	biological_process:GO:0006098//pentose-phosphate shunt;GO:0019521//D-gluconate metabolic process;molecular_function:GO:0004616//phosphogluconate dehydrogenase (decarboxylating) activity;
CL10409.Contig3_All	1533	0.8	0.87	0.79	0.16	0.23	0.3	19.4761	6.48235	-1.58711	0.0070966	Down	XP_005707591.1/3.6e-180/6-phosphogluconate dehydrogenase [Galdieria sulphuraria] >EME31071.1 6-phosphogluconate dehydrogenase [Galdieria sulphuraria]	BT102161.1/0.0/Picea glauca clone GQ0167_L03 mRNA sequence	sp|Q94KU1|6PGD1_SPIOL/2.2e-126/6-phosphogluconate dehydrogenase, decarboxylating 1 OS=Spinacia oleracea GN=pgdC PE=1 SV=1	gsl:Gasu_15770/5.3e-181/6-phosphogluconate dehydrogenase; K00033 6-phosphogluconate dehydrogenase [EC:1.1.1.44 1.1.1.343]	YHR183w/1.1e-208/[G] KOG2653 6-phosphogluconate dehydrogenase	PR00076/3.1E-84/6-phosphogluconate dehydrogenase signature	biological_process:GO:0006098//pentose-phosphate shunt;GO:0019521//D-gluconate metabolic process;molecular_function:GO:0004616//phosphogluconate dehydrogenase (decarboxylating) activity;
CL1041.Contig1_All	1895	0.47	0.55	0.67	3.87	4.19	3.75	18.0032	129.02	2.84127	5.1485e-26	Up	XP_006482516.1/9.5e-215/PREDICTED: AAA-ATPase ASD, mitochondrial-like isoform X1 [Citrus sinensis]	XM_020380564.1/0.0/PREDICTED: Cajanus cajan AAA-ATPase ASD, mitochondrial-like (LOC109815768), mRNA	sp|Q9FLD5|ASD_ARATH/5.7e-180/AAA-ATPase ASD, mitochondrial OS=Arabidopsis thaliana GN=AATP1 PE=1 SV=1	pxb:103928486/2.3e-189/LOW QUALITY PROTEIN: AAA-ATPase ASD, mitochondrial-like; K08900 mitochondrial chaperone BCS1	At5g40010/1.3e-179/[O] KOG0743 AAA+-type ATPase	PTHR23070/0.0/--	cellular_component:GO:0016021//integral component of membrane;molecular_function:GO:0005524//ATP binding;
CL1041.Contig3_All	1901	3.4	2.5	3.19	8.52	8.37	8.32	95.0706	277.377	1.54478	7.44674e-24	Up	XP_006431051.1/3.9e-216/hypothetical protein CICLE_v10011449mg [Citrus clementina] >ESR44291.1 hypothetical protein CICLE_v10011449mg [Citrus clementina]	XM_006430987.1/0.0/Citrus clementina hypothetical protein (CICLE_v10011474mg) mRNA, complete cds	sp|Q9FLD5|ASD_ARATH/1.0e-181/AAA-ATPase ASD, mitochondrial OS=Arabidopsis thaliana GN=AATP1 PE=1 SV=1	pxb:103928486/1.7e-189/LOW QUALITY PROTEIN: AAA-ATPase ASD, mitochondrial-like; K08900 mitochondrial chaperone BCS1	At5g40010/2.4e-181/[O] KOG0743 AAA+-type ATPase	PF00004/2.8E-16/ATPase family associated with various cellular activities (AAA)	cellular_component:GO:0016021//integral component of membrane;molecular_function:GO:0005524//ATP binding;
CL1041.Contig4_All	1071	0.34	0.68	0.4	4.02	4.33	4.78	8.72614	77.8424	3.15714	4.68206e-17	Up	XP_006431051.1/2.7e-150/hypothetical protein CICLE_v10011449mg [Citrus clementina] >ESR44291.1 hypothetical protein CICLE_v10011449mg [Citrus clementina]	XM_006430987.1/0.0/Citrus clementina hypothetical protein (CICLE_v10011474mg) mRNA, complete cds	sp|Q9FLD5|ASD_ARATH/4.7e-131/AAA-ATPase ASD, mitochondrial OS=Arabidopsis thaliana GN=AATP1 PE=1 SV=1	mtr:MTR_6g009540/1.5e-126/P-loop nucleoside triphosphate hydrolase superfamily protein; K08900 mitochondrial chaperone BCS1	At5g40010/1.1e-130/[O] KOG0743 AAA+-type ATPase	PTHR23070:SF5/1.1E-201/--	cellular_component:GO:0016021//integral component of membrane;molecular_function:GO:0005524//ATP binding;
CL1041.Contig5_All	2035	3.93	3.84	3.99	8.95	8.61	8.03	131.871	302.439	1.19752	2.1291e-20	Up	XP_006482517.1/1.0e-214/PREDICTED: AAA-ATPase ASD, mitochondrial-like isoform X2 [Citrus sinensis]	XM_006482599.1/0.0/PREDICTED: Citrus sinensis AAA-ATPase At3g28580-like (LOC102608056), mRNA	sp|Q9FLD5|ASD_ARATH/2.1e-180/AAA-ATPase ASD, mitochondrial OS=Arabidopsis thaliana GN=AATP1 PE=1 SV=1	pxb:103928486/1.2e-188/LOW QUALITY PROTEIN: AAA-ATPase ASD, mitochondrial-like; K08900 mitochondrial chaperone BCS1	At5g40010/4.9e-180/[O] KOG0743 AAA+-type ATPase	SM00382/1.7E-9/ATPases associated with a variety of cellular activities	cellular_component:GO:0016021//integral component of membrane;molecular_function:GO:0005524//ATP binding;
CL10412.Contig10_All	942	0.78	0.64	0.94	2.3	2.28	2.83	11.7416	37.7957	1.68659	7.60002e-05	Up	NA	NA	NA	NA	NA	NA	NA
CL10412.Contig2_All	4815	1.39	0.62	1.55	2.56	2.53	2.11	97.1363	205.309	1.07972	0.000474499	Up	XP_006472295.1/0.0e+00/PREDICTED: calcium-transporting ATPase 1, chloroplastic [Citrus sinensis] >XP_006472296.1 PREDICTED: calcium-transporting ATPase 1, chloroplastic [Citrus sinensis]	XM_006472233.2/0.0/PREDICTED: Citrus sinensis calcium-transporting ATPase 1, chloroplastic (LOC102623812), transcript variant X2, mRNA	sp|Q37145|ACA1_ARATH/0.0e+00/Calcium-transporting ATPase 1 OS=Arabidopsis thaliana GN=ACA1 PE=1 SV=3	cit:102623812/0.0e+00/calcium-transporting ATPase 1, chloroplastic; K01537 Ca2+-transporting ATPase [EC:3.6.3.8]	At1g27770/0.0e+00/[P] KOG0204 Calcium transporting ATPase	PF00689/7.1E-44/Cation transporting ATPase, C-terminus	cellular_component:GO:0043231//intracellular membrane-bounded organelle;GO:0005887//integral component of plasma membrane;GO:0016021//integral component of membrane;molecular_function:GO:0005524//ATP binding;GO:0005388//calcium-transporting ATPase activity;GO:0005516//calmodulin binding;
CL10412.Contig4_All	4569	13.52	12.63	13.59	26.14	26.76	27.48	1023.89	2187.14	1.09499	8.18574e-105	Up	XP_006472295.1/0.0e+00/PREDICTED: calcium-transporting ATPase 1, chloroplastic [Citrus sinensis] >XP_006472296.1 PREDICTED: calcium-transporting ATPase 1, chloroplastic [Citrus sinensis]	XM_006472233.2/0.0/PREDICTED: Citrus sinensis calcium-transporting ATPase 1, chloroplastic (LOC102623812), transcript variant X2, mRNA	sp|Q37145|ACA1_ARATH/0.0e+00/Calcium-transporting ATPase 1 OS=Arabidopsis thaliana GN=ACA1 PE=1 SV=3	cit:102623812/0.0e+00/calcium-transporting ATPase 1, chloroplastic; K01537 Ca2+-transporting ATPase [EC:3.6.3.8]	At1g27770/0.0e+00/[P] KOG0204 Calcium transporting ATPase	PF00689/7.1E-44/Cation transporting ATPase, C-terminus	cellular_component:GO:0043231//intracellular membrane-bounded organelle;GO:0005887//integral component of plasma membrane;GO:0016021//integral component of membrane;molecular_function:GO:0005524//ATP binding;GO:0005388//calcium-transporting ATPase activity;GO:0005516//calmodulin binding;
CL10412.Contig6_All	2618	4.77	3.91	4.53	15.43	15.44	16.87	192.575	733.573	1.92952	1.9394e-82	Up	NA	KJ524105.1/0.0/Paphiopedilum niveum chloroplast, complete genome	NA	NA	NA	NA	NA
CL10412.Contig8_All	873	2.11	1.6	1.93	3.71	3.95	3.65	25.7377	53.4306	1.05378	0.00162367	Up	XP_010999868.1/2.7e-23/PREDICTED: calcium-transporting ATPase 1, chloroplastic [Populus euphratica]	XM_020560988.1/0.0/PREDICTED: Prunus persica uncharacterized LOC18765988 (LOC18765988), transcript variant X2, mRNA	sp|Q37145|ACA1_ARATH/7.0e-24/Calcium-transporting ATPase 1 OS=Arabidopsis thaliana GN=ACA1 PE=1 SV=3	pop:POPTR_0014s01690g/4.0e-24/POPTRDRAFT_730788; azetidine-2-carboxylic acid resistant 1 family protein; K01537 Ca2+-transporting ATPase [EC:3.6.3.8]	At1g27770/1.6e-23/[P] KOG0204 Calcium transporting ATPase	PF12515/4.4E-22/Ca2+-ATPase N terminal autoinhibitory domain	cellular_component:GO:0043231//intracellular membrane-bounded organelle;GO:0005887//integral component of plasma membrane;molecular_function:GO:0005524//ATP binding;GO:0005388//calcium-transporting ATPase activity;GO:0005516//calmodulin binding;
CL10417.Contig2_All	4894	2.97	3.24	3.16	0.99	1.41	1.41	257.602	111.535	-1.20765	3.13702e-13	Down	XP_015389487.1/1.5e-272/PREDICTED: putative disease resistance protein RGA3 [Citrus sinensis]	XM_006464143.1/0.0/PREDICTED: Citrus sinensis putative disease resistance protein RGA3 (LOC102611108), transcript variant X2, mRNA	sp|Q7XBQ9|RGA2_SOLBU/5.0e-111/Disease resistance protein RGA2 OS=Solanum bulbocastanum GN=RGA2 PE=1 SV=1	hbr:110659116/1.6e-157/putative disease resistance protein RGA3 isoform X1; K15078 structure-specific endonuclease subunit SLX1 [EC:3.6.1.-]	NA	PTHR23155/1.0E-299/--	NA
CL10418.Contig6_All	1491	2.79	2.62	2.14	5.46	7.83	6.14	61.3212	165.206	1.42981	1.24316e-10	Up	XP_016680506.1/1.6e-156/PREDICTED: aldo-keto reductase family 4 member C9-like [Gossypium hirsutum]	XM_021433248.1/0.0/PREDICTED: Herrania umbratica NADPH-dependent aldo-keto reductase, chloroplastic (LOC110420082), mRNA	sp|Q0PGJ6|AKRC9_ARATH/2.8e-142/NADPH-dependent aldo-keto reductase, chloroplastic OS=Arabidopsis thaliana GN=AKR4C9 PE=1 SV=1	ghi:107899336/2.3e-157/aldo-keto reductase family 4 member C9-like; K00002 alcohol dehydrogenase (NADP+) [EC:1.1.1.2]	At3g53880/7.8e-135/[R] KOG1577 Aldo/keto reductase family proteins	PR00069/1.8E-55/Aldo-keto reductase signature	molecular_function:GO:0016491//oxidoreductase activity;
CL10420.Contig3_All	1632	0.7	0.99	1.34	0.43	0.4	0.46	25.9936	12.1329	-1.09923	0.0426876	Down	XP_015389734.1/6.1e-194/PREDICTED: uncharacterized protein LOC102618295 isoform X2 [Citrus sinensis] >KDO86443.1 hypothetical protein CISIN_1g017571mg [Citrus sinensis] >KDO86444.1 hypothetical protein CISIN_1g017571mg [Citrus sinensis]	XM_015534248.1/0.0/PREDICTED: Citrus sinensis hypothetical protein (LOC102618295), transcript variant X5, mRNA	NA	ats:109769794/7.8e-130/uncharacterized protein LOC109769794; K01513 ectonucleotide pyrophosphatase/phosphodiesterase family member 1/3 [EC:3.1.4.1 3.6.1.9]	At2g46420/1.9e-126/[S] LSE0483 A Uncharacterized protein	PF09713/6.7E-27/Plant protein 1589 of unknown function (A_thal_3526)	NA
CL10424.Contig1_All	1015	8.28	5.7	6.88	2.29	2.65	3.05	111.783	45.8151	-1.28681	6.83048e-07	Down	ACG27081.1/4.3e-97/40S ribosomal protein S4 [Zea mays]	FN392572.1/0.0/Imantonia rotunda partial mRNA for 40S ribosomal protein S4, contig 03105	sp|O22424|RS4_MAIZE/5.1e-87/40S ribosomal protein S4 OS=Zea mays GN=RPS4 PE=2 SV=1	csl:COCSUDRAFT_65295/1.1e-94/ribosomal protein S4 component of cytosolic 80S ribosome and 40S small subunit; K02987 small subunit ribosomal protein S4e	SPBC19F8.08/1.2e-105/[J] KOG0378 40S ribosomal protein S4	PD002667/2.0E-35/RIBOSOMAL RIBONUCLEOPROTEIN RNA-BINDING 40S S4 S4 S4E 30S ISOFORM X	biological_process:GO:0006412//translation;cellular_component:GO:0005840//ribosome;GO:0022627//cytosolic small ribosomal subunit;molecular_function:GO:0003723//RNA binding;GO:0003735//structural constituent of ribosome;GO:0019843//rRNA binding;
CL10424.Contig2_All	1057	12.65	12.04	12.13	4.67	4.28	5.49	206.661	86.0322	-1.26432	2.47626e-14	Down	ACG27081.1/1.7e-96/40S ribosomal protein S4 [Zea mays]	FN392572.1/0.0/Imantonia rotunda partial mRNA for 40S ribosomal protein S4, contig 03105	sp|O22424|RS4_MAIZE/2.0e-86/40S ribosomal protein S4 OS=Zea mays GN=RPS4 PE=2 SV=1	csl:COCSUDRAFT_65295/4.5e-94/ribosomal protein S4 component of cytosolic 80S ribosome and 40S small subunit; K02987 small subunit ribosomal protein S4e	SPBC19F8.08/4.6e-105/[J] KOG0378 40S ribosomal protein S4	PS00528/-/Ribosomal protein S4e signature.	biological_process:GO:0006412//translation;cellular_component:GO:0005840//ribosome;GO:0022627//cytosolic small ribosomal subunit;molecular_function:GO:0003723//RNA binding;GO:0003735//structural constituent of ribosome;GO:0019843//rRNA binding;
CL10426.Contig4_All	1250	1.11	1.13	1.13	1.89	1.82	2.86	22.5462	45.9302	1.02656	0.00985875	Up	XP_006480531.1/8.9e-36/PREDICTED: uncharacterized protein LOC102607457 [Citrus sinensis] >XP_006480532.1 PREDICTED: uncharacterized protein LOC102607457 [Citrus sinensis]	NA	NA	hbr:110651770/5.4e-14/probable disease resistance protein At4g27220; K13459 disease resistance protein RPS2	NA	PS50808/9.784/Zinc finger BED-type profile.	NA
CL10426.Contig5_All	812	0	0.98	0.71	2.1	1.48	1.74	7.58844	22.3517	1.55851	0.0448917	Up	XP_006480531.1/5.8e-36/PREDICTED: uncharacterized protein LOC102607457 [Citrus sinensis] >XP_006480532.1 PREDICTED: uncharacterized protein LOC102607457 [Citrus sinensis]	NA	NA	hbr:110651770/3.5e-14/probable disease resistance protein At4g27220; K13459 disease resistance protein RPS2	NA	PS50808/9.784/Zinc finger BED-type profile.	NA
CL10428.Contig4_All	2278	1.86	2.06	2.59	0.71	0.94	0.85	81.2403	33.3412	-1.28489	9.28515e-06	Down	XP_006436629.1/9.5e-161/hypothetical protein CICLE_v10031772mg [Citrus clementina] >XP_006485220.1 PREDICTED: uncharacterized protein LOC102620843 isoform X1 [Citrus sinensis] >ESR49869.1 hypothetical protein CICLE_v10031772mg [Citrus clementina]	XM_006485157.2/0.0/PREDICTED: Citrus sinensis DAG protein, chloroplastic (LOC102620843), transcript variant X1, mRNA	sp|Q8L440|ORRM1_ARATH/6.1e-120/Organelle RRM domain-containing protein 1, chloroplastic OS=Arabidopsis thaliana GN=ORRM1 PE=1 SV=1	sind:105166581/4.6e-19/uncharacterized protein LOC105166581; K00655 1-acyl-sn-glycerol-3-phosphate acyltransferase [EC:2.3.1.51]	At3g20930_1/8.4e-72/[M] LSE0398 A DAG protein involved in chloroplast differentiation/palisade development and related proteins	SM00360/4.7E-25/RNA recognition motif	molecular_function:GO:0003723//RNA binding;
CL10430.Contig2_All	484	1.91	1.58	3	0.83	0.41	0.52	14.0001	4.53897	-1.625	0.0272681	Down	NA	NA	NA	NA	NA	NA	NA
CL10431.Contig1_All	762	4.65	5.03	3.64	2.23	1.77	1.61	51.9987	23.5798	-1.14092	0.00147517	Down	NA	NA	NA	NA	NA	NA	NA
CL10431.Contig5_All	3589	3.3	3.23	3.44	0.96	1.18	1.08	199.869	68.2725	-1.54968	1.68718e-19	Down	XP_006424557.1/0.0e+00/hypothetical protein CICLE_v10027901mg [Citrus clementina] >ESR37797.1 hypothetical protein CICLE_v10027901mg [Citrus clementina]	XM_006424494.1/0.0/Citrus clementina hypothetical protein (CICLE_v10027901mg) mRNA, complete cds	sp|Q9SKN5|ARFJ_ARATH/2.7e-231/Auxin response factor 10 OS=Arabidopsis thaliana GN=ARF10 PE=2 SV=1	cann:107859326/9.3e-67/auxin response factor 3; K14486 auxin response factor	At2g28350/6.3e-231/[TK] LSE0284 A Auxin response transcription factor	PF02362/1.9E-21/B3 DNA binding domain	biological_process:GO:0006355//regulation of transcription, DNA-templated;GO:0009734//auxin-activated signaling pathway;GO:0006351//transcription, DNA-templated;cellular_component:GO:0005634//nucleus;molecular_function:GO:0003677//DNA binding;
CL10443.Contig2_All	1956	1.04	0.8	1.38	6.25	6.63	5.43	34.5304	206.613	2.58099	6.04395e-31	Up	CAN65591.1/3.7e-121/hypothetical protein VITISV_042091 [Vitis vinifera]	AM465795.2/0.0/Vitis vinifera contig VV78X199301.29, whole genome shotgun sequence	NA	dct:110097550/3.9e-43/protein argonaute 1A-like; K11593 eukaryotic translation initiation factor 2C	At1g59265/3.0e-102/[R] KOG0017 FOG: Transposon-encoded proteins with TYA, reverse transcriptase, integrase domains in various combinations	PTHR11439/2.4E-114/--	NA
CL10446.Contig1_All	1598	26.85	23.34	25.32	84.5	79.51	83.24	659.579	2275.97	1.78687	1.72766e-199	Up	XP_006472243.1/9.6e-160/PREDICTED: galactinol synthase 2-like [Citrus sinensis]	XM_006472180.2/0.0/PREDICTED: Citrus sinensis galactinol synthase 2-like (LOC102608882), mRNA	sp|C7G304|GOLS2_SOLLC/3.8e-153/Galactinol synthase 2 OS=Solanum lycopersicum GN=GOLS2 PE=2 SV=1	cit:102608882/1.4e-160/galactinol synthase 2-like; K18819 inositol 3-alpha-galactosyltransferase [EC:2.4.1.123]	At1g56600/2.1e-149/[G] KOG1950 Glycosyl transferase, family 8 - glycogenin	PTHR11183:SF59/5.7E-202/--	molecular_function:GO:0016757//transferase activity, transferring glycosyl groups;
CL10448.Contig1_All	875	3.15	2.65	3.55	36.47	34.65	34.04	43.4652	506.734	3.5433	3.53341e-114	Up	XP_021893942.1/1.6e-71/dirigent protein 22-like [Carica papaya]	XM_021426567.1/0.0/PREDICTED: Herrania umbratica dirigent protein 22-like (LOC110415079), mRNA	sp|Q9SS03|DIR21_ARATH/1.9e-53/Dirigent protein 21 OS=Arabidopsis thaliana GN=DIR21 PE=3 SV=1	csat:104723377/1.2e-44/isoleucine--tRNA ligase, chloroplastic/mitochondrial-like; K01870 isoleucyl-tRNA synthetase [EC:6.1.1.5]	At1g65870/4.4e-53/[S] LSE0373 A Uncharacterized	PTHR21495/9.1E-110/--	cellular_component:GO:0048046//apoplast;molecular_function:GO:0016853//isomerase activity;
CL10453.Contig2_All	546	2.57	2.51	2.17	0.24	0.25	0.35	18.3433	2.63411	-2.79986	4.10683e-05	Down	XP_008614900.1/9.9e-32/60S ribosomal protein L37-A [Saprolegnia diclina VS20] >XP_012203244.1 60S ribosomal protein L37-A [Saprolegnia parasitica CBS 223.65] >EQC31501.1 60S ribosomal protein L37-A [Saprolegnia diclina VS20] >KDO25957.1 60S ribosomal protein L37-A [Saprolegnia parasitica CBS 223.65] >OQR97676.1 ribosomal protein L37e [Achlya hypogyna]	NA	sp|Q43292|RL372_ARATH/2.9e-28/60S ribosomal protein L37-2 OS=Arabidopsis thaliana GN=RPL37B PE=3 SV=2	csl:COCSUDRAFT_32959/1.8e-30/ribosomal protein L37 component of cytosolic 80S ribosome and 60S large subunit; K02922 large subunit ribosomal protein L37e	7293042/4.5e-32/[J] KOG3475 60S ribosomal protein L37	NA	biological_process:GO:0006412//translation;cellular_component:GO:0005840//ribosome;GO:0022625//cytosolic large ribosomal subunit;molecular_function:GO:0003723//RNA binding;GO:0046872//metal ion binding;GO:0003735//structural constituent of ribosome;GO:0019843//rRNA binding;
CL10453.Contig3_All	533	4.2	3.9	4.19	1.24	0.48	0.85	31.2852	7.62621	-2.03644	3.94886e-05	Down	XP_008614900.1/2.7e-34/60S ribosomal protein L37-A [Saprolegnia diclina VS20] >XP_012203244.1 60S ribosomal protein L37-A [Saprolegnia parasitica CBS 223.65] >EQC31501.1 60S ribosomal protein L37-A [Saprolegnia diclina VS20] >KDO25957.1 60S ribosomal protein L37-A [Saprolegnia parasitica CBS 223.65] >OQR97676.1 ribosomal protein L37e [Achlya hypogyna]	NA	sp|Q43292|RL372_ARATH/3.6e-31/60S ribosomal protein L37-2 OS=Arabidopsis thaliana GN=RPL37B PE=3 SV=2	bpg:Bathy04g03440/2.4e-32/60S ribosomal protein L37; K02922 large subunit ribosomal protein L37e	SPCC1223.05c/5.1e-36/[J] KOG3475 60S ribosomal protein L37	NA	biological_process:GO:0006412//translation;cellular_component:GO:0005840//ribosome;GO:0022625//cytosolic large ribosomal subunit;molecular_function:GO:0003723//RNA binding;GO:0046872//metal ion binding;GO:0003735//structural constituent of ribosome;GO:0019843//rRNA binding;
CL10460.Contig1_All	1094	3.61	3.31	2.81	0.61	0.49	0.38	55.6294	9.71062	-2.51821	2.38366e-10	Down	ACG27083.1/2.1e-102/60S ribosomal protein L5-2 [Zea mays]	XM_004296319.2/0.0/PREDICTED: Fragaria vesca subsp. vesca 60S ribosomal protein L5-like (LOC101300331), mRNA	sp|Q8LBI1|RL51_ARATH/3.0e-85/60S ribosomal protein L5-1 OS=Arabidopsis thaliana GN=ATL5 PE=1 SV=2	mdm:103425360/6.9e-90/60S ribosomal protein L5; K02932 large subunit ribosomal protein L5e	YPL131w/1.3e-110/[J] KOG0875 60S ribosomal protein L5	PR00058/2.7E-68/Ribosomal protein L5 signature	biological_process:GO:0006412//translation;cellular_component:GO:0005840//ribosome;molecular_function:GO:0003735//structural constituent of ribosome;GO:0008097//5S rRNA binding;
CL10460.Contig2_All	397	2.44	1.55	2.13	0.18	0.69	0.69	10.789	3.48522	-1.63024	0.0446013	Down	NA	NA	NA	apro:F751_4741/8.5e-06/60S ribosomal protein L5-1; K02932 large subunit ribosomal protein L5e	YPL131w/1.2e-10/[J] KOG0875 60S ribosomal protein L5	NA	NA
CL10462.Contig2_All	4010	0.23	0.29	0.37	0.7	0.7	1.1	20.1902	58.4526	1.53361	5.67267e-05	Up	XP_006452908.1/4.7e-139/hypothetical protein CICLE_v10007512mg [Citrus clementina] >ESR66148.1 hypothetical protein CICLE_v10007512mg [Citrus clementina]	XM_006474498.2/0.0/PREDICTED: Citrus sinensis conserved oligomeric Golgi complex subunit 3 (LOC102610880), mRNA	NA	cit:102610880/1.3e-138/conserved oligomeric Golgi complex subunit 3; K20290 conserved oligomeric Golgi complex subunit 3	At1g73430/9.9e-100/[U] KOG2604 Subunit of cis-Golgi transport vesicle tethering complex - Sec34p	PF00076/5.6E-10/RNA recognition motif. (a.k.a. RRM, RBD, or RNP domain)	biological_process:GO:0006886//intracellular protein transport;cellular_component:GO:0016020//membrane;GO:0005801//cis-Golgi network;
CL10465.Contig1_All	374	2.25	2.32	2.85	0.76	0.74	0.56	11.8141	4.10706	-1.52433	0.0403065	Down	NA	NA	NA	NA	NA	PF04568/9.0E-15/Mitochondrial ATPase inhibitor, IATP	NA
CL10466.Contig1_All	894	1.91	2.42	1.73	0.14	0.54	0.2	27.261	5.03475	-2.43685	2.85277e-05	Down	NP_195193.1/3.1e-91/Ribosomal protein S3Ae [Arabidopsis thaliana] >Q42262.3 RecName: Full=40S ribosomal protein S3a-2 >CAA04689.1 Putative S-phase-specific ribosomal protein [Arabidopsis thaliana] >CAA18846.1 Putative S-phase-specific ribosomal protein [Arabidopsis thaliana] >CAB80184.1 Putative S-phase-specific ribosomal protein [Arabidopsis thaliana] >AAL32578.1 Putative S-phase-specific riboso…	NA	sp|Q42262|RS3A2_ARATH/1.9e-93/40S ribosomal protein S3a-2 OS=Arabidopsis thaliana GN=RPS3AB PE=2 SV=3	ath:AT4G34670/4.6e-92/Ribosomal protein S3Ae; K02984 small subunit ribosomal protein S3Ae	SPAC22H12.04c/2.4e-94/[J] KOG1628 40S ribosomal protein S3A	PF01015/1.3E-95/Ribosomal S3Ae family	biological_process:GO:0002181//cytoplasmic translation;GO:0006412//translation;cellular_component:GO:0005840//ribosome;GO:0016020//membrane;GO:0042788//polysomal ribosome;GO:0009506//plasmodesma;GO:0005618//cell wall;GO:0005730//nucleolus;GO:0005829//cytosol;GO:0022627//cytosolic small ribosomal subunit;GO:0005886//plasma membrane;GO:0022626//cytosolic ribosome;molecular_function:GO:0003729//mRNA…
CL10466.Contig2_All	896	2.05	1.93	2.7	0.76	0.4	0.87	30.7184	10.5761	-1.5383	0.00184766	Down	NP_195193.1/3.1e-91/Ribosomal protein S3Ae [Arabidopsis thaliana] >Q42262.3 RecName: Full=40S ribosomal protein S3a-2 >CAA04689.1 Putative S-phase-specific ribosomal protein [Arabidopsis thaliana] >CAA18846.1 Putative S-phase-specific ribosomal protein [Arabidopsis thaliana] >CAB80184.1 Putative S-phase-specific ribosomal protein [Arabidopsis thaliana] >AAL32578.1 Putative S-phase-specific riboso…	NA	sp|Q42262|RS3A2_ARATH/1.9e-93/40S ribosomal protein S3a-2 OS=Arabidopsis thaliana GN=RPS3AB PE=2 SV=3	ath:AT4G34670/4.6e-92/Ribosomal protein S3Ae; K02984 small subunit ribosomal protein S3Ae	SPAC22H12.04c/2.4e-94/[J] KOG1628 40S ribosomal protein S3A	PF01015/1.3E-95/Ribosomal S3Ae family	biological_process:GO:0002181//cytoplasmic translation;GO:0006412//translation;cellular_component:GO:0005840//ribosome;GO:0016020//membrane;GO:0042788//polysomal ribosome;GO:0009506//plasmodesma;GO:0005618//cell wall;GO:0005730//nucleolus;GO:0005829//cytosol;GO:0022627//cytosolic small ribosomal subunit;GO:0005886//plasma membrane;GO:0022626//cytosolic ribosome;molecular_function:GO:0003729//mRNA…
CL10466.Contig3_All	894	4.44	3.54	4.71	0.9	1.15	1.01	58.9794	15.6571	-1.9134	5.8669e-08	Down	NP_195193.1/3.1e-91/Ribosomal protein S3Ae [Arabidopsis thaliana] >Q42262.3 RecName: Full=40S ribosomal protein S3a-2 >CAA04689.1 Putative S-phase-specific ribosomal protein [Arabidopsis thaliana] >CAA18846.1 Putative S-phase-specific ribosomal protein [Arabidopsis thaliana] >CAB80184.1 Putative S-phase-specific ribosomal protein [Arabidopsis thaliana] >AAL32578.1 Putative S-phase-specific riboso…	NA	sp|Q42262|RS3A2_ARATH/1.9e-93/40S ribosomal protein S3a-2 OS=Arabidopsis thaliana GN=RPS3AB PE=2 SV=3	ath:AT4G34670/4.6e-92/Ribosomal protein S3Ae; K02984 small subunit ribosomal protein S3Ae	SPAC22H12.04c/2.4e-94/[J] KOG1628 40S ribosomal protein S3A	PF01015/1.3E-95/Ribosomal S3Ae family	biological_process:GO:0002181//cytoplasmic translation;GO:0006412//translation;cellular_component:GO:0005840//ribosome;GO:0016020//membrane;GO:0042788//polysomal ribosome;GO:0009506//plasmodesma;GO:0005618//cell wall;GO:0005730//nucleolus;GO:0005829//cytosol;GO:0022627//cytosolic small ribosomal subunit;GO:0005886//plasma membrane;GO:0022626//cytosolic ribosome;molecular_function:GO:0003729//mRNA…
CL10471.Contig2_All	970	2.31	3.72	3.36	1.09	0.96	1.28	46.7523	17.933	-1.38242	0.000485921	Down	GAX77684.1/7.1e-33/hypothetical protein CEUSTIGMA_g5127.t1 [Chlamydomonas eustigma]	NA	sp|Q9T0K5|LRX3_ARATH/3.2e-30/Leucine-rich repeat extensin-like protein 3 OS=Arabidopsis thaliana GN=LRX3 PE=1 SV=1	aip:107619883/3.4e-32/formin-like protein 20; K02184 formin 2	At4g13340/7.6e-30/[M] LSE0601 A Pollen extensin-like protein (Pex)	PR01217/4.9E-11/Proline rich extensin signature	NA
CL10473.Contig6_All	1647	1.95	1.75	1.37	3.59	3.2	3.14	45.3556	93.0864	1.03729	5.33931e-05	Up	AKE49469.1/1.5e-211/NBS-LRR disease resistance protein NBS54 [Dimocarpus longan] >AKE49470.1 NBS-LRR disease resistance protein NBS55 [Dimocarpus longan]	KP266536.1/0.0/Dimocarpus longan NBS-LRR disease resistance protein NBS55 mRNA, complete cds	sp|Q9FKZ1|DRL42_ARATH/3.0e-113/Probable disease resistance protein At5g66900 OS=Arabidopsis thaliana GN=At5g66900 PE=3 SV=1	cpap:110822548/3.9e-89/probable disease resistance protein At5g66910; K19613 leucine-rich repeat protein SHOC2	At5g66900/7.1e-113/[T] LSE0012 A Apoptotic ATPase, disease resistance determinant	PF00931/6.0E-15/NB-ARC domain	biological_process:GO:0006952//defense response;molecular_function:GO:0043531//ADP binding;
CL10481.Contig1_All	5105	1.19	1.08	1.39	0.42	0.38	0.23	104.614	31.5596	-1.72892	7.95701e-10	Down	XP_021605434.1/1.7e-85/cytochrome P450 710A1-like [Manihot esculenta] >OAY57876.1 hypothetical protein MANES_02G132100 [Manihot esculenta]	GQ856147.1/0.0/Citrullus lanatus mitochondrion, complete genome	sp|Q1T7C2|C7111_SOLLC/9.5e-81/Cytochrome P450 710A11 OS=Solanum lycopersicum GN=CYP710A11 PE=1 SV=1	tcc:18596516/3.3e-86/cytochrome P450 710A1; K09832 sterol 22-desaturase [EC:1.14.19.41]	At2g34500/3.2e-79/[QI] KOG0157 Cytochrome P450 CYP4/CYP19/CYP26 subfamilies	NA	cellular_component:GO:0016021//integral component of membrane;molecular_function:GO:0016705//oxidoreductase activity, acting on paired donors, with incorporation or reduction of molecular oxygen;GO:0020037//heme binding;GO:0005506//iron ion binding;GO:0004497//monooxygenase activity;
CL10481.Contig2_All	4975	3.57	3.92	3.71	1.41	1.67	1.44	313.974	134.041	-1.22798	1.17227e-20	Down	XP_019420808.1/8.6e-74/PREDICTED: uncharacterized protein LOC109330987, partial [Lupinus angustifolius]	GQ856147.1/0.0/Citrullus lanatus mitochondrion, complete genome	sp|P10330|NU5M_OENBE/2.1e-69/NADH-ubiquinone oxidoreductase chain 5 OS=Oenothera berteroana GN=ND5 PE=2 SV=2	tcc:18596516/7.8e-72/cytochrome P450 710A1; K09832 sterol 22-desaturase [EC:1.14.19.41]	AtMi005/8.9e-66/[C] KOG4668 NADH dehydrogenase subunits 2, 5, and related proteins	PTHR24286/7.0E-92/--	NA
CL10481.Contig3_All	355	1.2	3.45	2.32	0.41	0.6	0.2	10.3354	2.58796	-1.9977	0.0198549	Down	AEV91320.1/5.8e-17/sterol 22-desaturase, partial [Dimocarpus longan]	JN398319.1/0.0/Dimocarpus longan cultivar Honghezi sterol 22-desaturase mRNA, partial cds	sp|O64697|C7101_ARATH/4.5e-14/Cytochrome P450 710A1 OS=Arabidopsis thaliana GN=CYP710A1 PE=1 SV=1	tcc:18596516/2.1e-16/cytochrome P450 710A1; K09832 sterol 22-desaturase [EC:1.14.19.41]	At2g34500/1.0e-13/[QI] KOG0157 Cytochrome P450 CYP4/CYP19/CYP26 subfamilies	PTHR24286:SF0/7.1E-13/--	NA
CL10481.Contig4_All	1074	4.95	6.67	4.67	1.29	1.29	1.77	92.1848	26.4547	-1.80101	1.76359e-09	Down	XP_021605434.1/3.6e-86/cytochrome P450 710A1-like [Manihot esculenta] >OAY57876.1 hypothetical protein MANES_02G132100 [Manihot esculenta]	JN398319.1/0.0/Dimocarpus longan cultivar Honghezi sterol 22-desaturase mRNA, partial cds	sp|Q1T7C2|C7111_SOLLC/2.0e-81/Cytochrome P450 710A11 OS=Solanum lycopersicum GN=CYP710A11 PE=1 SV=1	tcc:18596516/7.0e-87/cytochrome P450 710A1; K09832 sterol 22-desaturase [EC:1.14.19.41]	At2g34500/6.8e-80/[QI] KOG0157 Cytochrome P450 CYP4/CYP19/CYP26 subfamilies	PTHR24286/3.3E-67/--	cellular_component:GO:0016021//integral component of membrane;molecular_function:GO:0016705//oxidoreductase activity, acting on paired donors, with incorporation or reduction of molecular oxygen;GO:0020037//heme binding;GO:0005506//iron ion binding;GO:0004497//monooxygenase activity;
CL10481.Contig7_All	962	3.41	1.95	3.55	1.15	0.98	1.26	44.2729	17.96	-1.30163	0.00228631	Down	XP_021605434.1/4.6e-48/cytochrome P450 710A1-like [Manihot esculenta] >OAY57876.1 hypothetical protein MANES_02G132100 [Manihot esculenta]	JN398319.1/0.0/Dimocarpus longan cultivar Honghezi sterol 22-desaturase mRNA, partial cds	sp|Q1T7C2|C7111_SOLLC/7.1e-46/Cytochrome P450 710A11 OS=Solanum lycopersicum GN=CYP710A11 PE=1 SV=1	cit:102618952/5.7e-48/cytochrome P450 710A1-like; K09832 sterol 22-desaturase [EC:1.14.19.41]	At2g34500/1.8e-44/[QI] KOG0157 Cytochrome P450 CYP4/CYP19/CYP26 subfamilies	PTHR24286:SF0/2.2E-66/--	cellular_component:GO:0016021//integral component of membrane;molecular_function:GO:0016705//oxidoreductase activity, acting on paired donors, with incorporation or reduction of molecular oxygen;GO:0020037//heme binding;GO:0005506//iron ion binding;GO:0004497//monooxygenase activity;
CL10481.Contig8_All	1252	0	1.37	0.52	0	0	0	10.9667	1.17945	-3.21694	0.00237359	Down	XP_021605434.1/5.9e-48/cytochrome P450 710A1-like [Manihot esculenta] >OAY57876.1 hypothetical protein MANES_02G132100 [Manihot esculenta]	JN398319.1/0.0/Dimocarpus longan cultivar Honghezi sterol 22-desaturase mRNA, partial cds	sp|Q1T7C2|C7111_SOLLC/9.3e-46/Cytochrome P450 710A11 OS=Solanum lycopersicum GN=CYP710A11 PE=1 SV=1	cit:102618952/7.5e-48/cytochrome P450 710A1-like; K09832 sterol 22-desaturase [EC:1.14.19.41]	At2g34500/2.4e-44/[QI] KOG0157 Cytochrome P450 CYP4/CYP19/CYP26 subfamilies	PTHR24286:SF0/2.2E-66/--	cellular_component:GO:0016021//integral component of membrane;molecular_function:GO:0016705//oxidoreductase activity, acting on paired donors, with incorporation or reduction of molecular oxygen;GO:0020037//heme binding;GO:0005506//iron ion binding;GO:0004497//monooxygenase activity;
CL10482.Contig2_All	1556	0.83	0.86	0.81	2.14	1.71	1.9	20.9522	50.3838	1.26586	0.000247771	Up	BAK00933.1/2.4e-78/predicted protein [Hordeum vulgare subsp. vulgare]	NA	sp|P28641|DHN3_PEA/1.7e-09/Dehydrin DHN3 OS=Pisum sativum GN=DHN3 PE=2 SV=1	atr:18430196/7.7e-10/nuclear pore complex protein NUP98A isoform X1; K14297 nuclear pore complex protein Nup98-Nup96	7290345/6.3e-10/[T] KOG3753 Circadian clock protein period	PTHR31138/2.2E-110/--	NA
CL10482.Contig3_All	2336	0.51	0.73	0.76	1.62	1.62	1.54	25.8004	64.4325	1.3204	2.16784e-05	Up	BAK00933.1/8.5e-266/predicted protein [Hordeum vulgare subsp. vulgare]	NA	NA	NA	NA	PF14613/2.4E-62/Protein of unknown function (DUF4449)	NA
CL10482.Contig4_All	3213	1.33	1	1.06	2.34	2.49	2.51	60.8435	138.321	1.18484	9.29544e-09	Up	BAK00933.1/4.4e-297/predicted protein [Hordeum vulgare subsp. vulgare]	NA	sp|Q07322|ECP40_DAUCA/1.4e-08/Embryogenic cell protein 40 OS=Daucus carota GN=ECP40 PE=1 SV=1	atr:18430196/2.1e-09/nuclear pore complex protein NUP98A isoform X1; K14297 nuclear pore complex protein Nup98-Nup96	At3g28840/2.2e-09/[S] LSE0099 A Uncharacterized protein	PTHR31138/0.0/--	NA
CL10482.Contig5_All	583	0.75	0.66	0.99	2.12	1.53	2.33	6.53239	17.7282	1.44037	0.0206587	Up	BAK00933.1/4.6e-35/predicted protein [Hordeum vulgare subsp. vulgare]	NA	NA	NA	NA	PF14613/2.6E-62/Protein of unknown function (DUF4449)	NA
CL10483.Contig5_All	569	2.18	2.15	1.71	0.34	0.25	0	16.0596	2.34084	-2.77834	0.000187041	Down	Q41346.1/1.7e-47/RecName: Full=Cytochrome c >CAA79708.1 mitochondrial cytochrome c [Stellaria longipes]	X59459.1/0.0/A.thaliana AtCc-1 gene for cytochrome c	sp|Q41346|CYC_STELP/1.1e-49/Cytochrome c OS=Stellaria longipes PE=3 SV=1	ota:OT_ostta04g02580/1.6e-34/Cytochrome c, class IA/ IB; K08738 cytochrome c	SPCC191.07/3.0e-42/[C] KOG3453 Cytochrome c	NA	biological_process:GO:0055114//oxidation-reduction process;cellular_component:GO:0070469//respiratory chain;GO:0005739//mitochondrion;molecular_function:GO:0009055//electron transfer activity;GO:0046872//metal ion binding;GO:0020037//heme binding;
CL10492.Contig1_All	1159	1.02	1.71	1.61	5.76	4.38	3.64	27.0319	88.8512	1.71673	1.04383e-07	Up	XP_006445861.1/1.8e-78/hypothetical protein CICLE_v10018248mg [Citrus clementina] >XP_006492740.1 PREDICTED: dirigent protein 22 [Citrus sinensis] >ESR59101.1 hypothetical protein CICLE_v10018248mg [Citrus clementina] >KDO62964.1 hypothetical protein CISIN_1g044398mg [Citrus sinensis]	XM_021422750.1/0.0/PREDICTED: Herrania umbratica dirigent protein 22-like (LOC110412231), mRNA	sp|Q9C891|DIR20_ARATH/4.4e-58/Dirigent protein 20 OS=Arabidopsis thaliana GN=DIR20 PE=2 SV=1	csat:104723377/1.5e-47/isoleucine--tRNA ligase, chloroplastic/mitochondrial-like; K01870 isoleucyl-tRNA synthetase [EC:6.1.1.5]	At1g55210/1.0e-57/[S] LSE0373 A Uncharacterized	PTHR21495/2.4E-104/--	cellular_component:GO:0048046//apoplast;GO:0016021//integral component of membrane;molecular_function:GO:0016853//isomerase activity;
CL10497.Contig7_All	1169	4.8	5.17	4.88	22.57	23.95	24.6	93.1377	469.209	2.33279	8.71273e-78	Up	BAT86037.1/4.9e-12/hypothetical protein VIGAN_04365000 [Vigna angularis var. angularis]	NA	NA	NA	NA	NA	NA
CL105.Contig1_All	2214	10.68	8.74	10.11	30.45	30	31.64	362.406	1190.54	1.71594	1.00437e-104	Up	XP_006474790.1/5.5e-198/PREDICTED: vacuolar cation/proton exchanger 5 isoform X2 [Citrus sinensis]	XM_008220808.1/0.0/PREDICTED: Prunus mume vacuolar cation/proton exchanger 5 (LOC103319295), mRNA	sp|Q8L783|CAX5_ARATH/1.3e-172/Vacuolar cation/proton exchanger 5 OS=Arabidopsis thaliana GN=CAX5 PE=2 SV=1	cit:102629460/6.9e-198/vacuolar cation/proton exchanger 5; K07300 Ca2+:H+ antiporter	At1g55730/3.1e-172/[P] KOG1397 Ca2+/H+ antiporter VCX1 and related proteins	PF01699/3.7E-23/Sodium/calcium exchanger protein	cellular_component:GO:0016021//integral component of membrane;molecular_function:GO:0015369//calcium:proton antiporter activity;
CL10502.Contig2_All	1831	0.24	0.12	0.09	0.62	0.55	0.54	4.40512	17.2723	1.97121	0.00286461	Up	XP_006486662.1/1.5e-36/PREDICTED: uncharacterized protein LOC102608364 [Citrus sinensis]	NA	sp|Q6WLH3|SMH5_MAIZE/1.7e-08/Single myb histone 5 OS=Zea mays GN=SMH5 PE=2 SV=1	zju:107411450/1.3e-29/uncharacterized protein LOC107411450 isoform X1; K11111 telomeric repeat-binding factor 2	At1g17520/2.0e-07/[R] TWOG0184 Myb-like DNA-binding domain and H15 domain (histone families 1 and 5)	PTHR21717/5.4E-49/--	biological_process:GO:0031627//telomeric loop formation;cellular_component:GO:0000783//nuclear telomere cap complex;molecular_function:GO:0003691//double-stranded telomeric DNA binding;GO:0003677//DNA binding;
CL10505.Contig7_All	1182	0.57	0.96	1.04	0.25	0.13	0.21	15.5197	3.91218	-1.98805	0.00444723	Down	XP_019078777.1/3.6e-55/PREDICTED: probable plastid-lipid-associated protein 4, chloroplastic isoform X2 [Vitis vinifera]	XM_021762151.1/0.0/PREDICTED: Manihot esculenta probable plastid-lipid-associated protein 4, chloroplastic (LOC110618876), mRNA	sp|Q9LU85|PAP4_ARATH/5.5e-32/Probable plastid-lipid-associated protein 4, chloroplastic OS=Arabidopsis thaliana GN=PAP4 PE=2 SV=1	NA	NA	PTHR31906:SF14/4.5E-59/--	NA
CL10506.Contig11_All	2540	9.16	10.58	10.29	20.91	19.46	19.39	424.077	890.437	1.07019	3.02128e-43	Up	XP_015381347.1/2.6e-228/PREDICTED: LRR receptor-like serine/threonine-protein kinase FLS2 [Citrus sinensis]	XM_006481780.2/0.0/PREDICTED: Citrus sinensis receptor-like protein 12 (LOC102620924), mRNA	sp|Q9C9H7|RLP12_ARATH/1.4e-72/Receptor-like protein 12 OS=Arabidopsis thaliana GN=RLP12 PE=2 SV=2	sly:101263330/1.8e-125/Eix2; EIX receptor 2; K13466 EIX receptor 1/2	At2g34930/6.5e-97/[R] KOG0619 FOG: Leucine rich repeat	PF13855/1.3E-7/Leucine rich repeat	NA
CL10506.Contig16_All	3009	5.22	5.66	4.55	2.07	2.6	2.24	258.24	122.625	-1.07446	1.75633e-11	Down	XP_015381347.1/2.0e-267/PREDICTED: LRR receptor-like serine/threonine-protein kinase FLS2 [Citrus sinensis]	NA	sp|Q9C9H7|RLP12_ARATH/2.8e-80/Receptor-like protein 12 OS=Arabidopsis thaliana GN=RLP12 PE=2 SV=2	sly:543900/3.8e-138/Eix1; EIX receptor 1; K13466 EIX receptor 1/2	At2g34930/5.7e-108/[R] KOG0619 FOG: Leucine rich repeat	PTHR27004/3.4E-288/--	NA
CL10506.Contig2_All	3383	6.91	7.67	8.05	2.97	2.86	2.92	427.858	175.428	-1.28625	1.34321e-29	Down	XP_021691696.1/1.9e-298/LRR receptor-like serine/threonine-protein kinase FLS2 [Hevea brasiliensis]	XM_015529503.1/0.0/PREDICTED: Citrus sinensis receptor-like protein 12 (LOC107176683), mRNA	sp|Q9FIZ3|GSO2_ARATH/1.8e-88/LRR receptor-like serine/threonine-protein kinase GSO2 OS=Arabidopsis thaliana GN=GSO2 PE=1 SV=2	sly:543900/1.5e-164/Eix1; EIX receptor 1; K13466 EIX receptor 1/2	At2g34930/9.5e-120/[R] KOG0619 FOG: Leucine rich repeat	SM00369/300.0/Leucine-rich repeats, typical (most populated) subfamily	NA
CL10512.Contig1_All	1199	1.29	1.47	0.91	0.35	0.49	0.24	22.9671	7.87025	-1.54509	0.00650401	Down	OSX77385.1/3.4e-61/hypothetical protein BU14_0151s0027 [Porphyra umbilicalis]	NA	sp|Q9ZRI7|EF1G1_ORYSJ/3.0e-62/Elongation factor 1-gamma 1 OS=Oryza sativa subsp. japonica GN=Os02g0220600 PE=2 SV=1	osa:4328753/7.4e-61/elongation factor 1-gamma 1; K03233 elongation factor 1-gamma	YKL081w_2/1.2e-37/[J] KOG1627 Translation elongation factor EF-1 gamma	PTHR11260/2.9E-124/--	molecular_function:GO:0003746//translation elongation factor activity;
CL10515.Contig1_All	1173	12.94	12.91	11.74	5.34	5.51	5.76	235.604	109.815	-1.10128	6.96925e-14	Down	GAQ82944.1/4.0e-62/alcohol dehydrogenase [Klebsormidium nitens]	NA	sp|Q6V4H0|10HGO_CATRO/6.4e-41/8-hydroxygeraniol dehydrogenase OS=Catharanthus roseus GN=10HGO PE=1 SV=1	zju:107425124/1.2e-42/8-hydroxygeraniol dehydrogenase-like isoform X1; K00083 cinnamyl-alcohol dehydrogenase [EC:1.1.1.195]	At4g37980/9.8e-40/[Q] KOG0023 Alcohol dehydrogenase, class V	PS00059/-/Zinc-containing alcohol dehydrogenases signature.	molecular_function:GO:0004022//alcohol dehydrogenase (NAD) activity;GO:0008270//zinc ion binding;GO:0016491//oxidoreductase activity;
CL10515.Contig2_All	1173	20.34	18.94	18.41	7.7	6.22	8.07	361.901	145.936	-1.31026	1.11103e-22	Down	GAQ82944.1/5.2e-62/alcohol dehydrogenase [Klebsormidium nitens]	NA	sp|P42754|MTDH_PETCR/8.4e-41/Mannitol dehydrogenase (Fragment) OS=Petroselinum crispum GN=ELI3 PE=2 SV=1	zju:107425124/1.5e-42/8-hydroxygeraniol dehydrogenase-like isoform X1; K00083 cinnamyl-alcohol dehydrogenase [EC:1.1.1.195]	At4g37990/5.7e-40/[Q] KOG0023 Alcohol dehydrogenase, class V	PS00059/-/Zinc-containing alcohol dehydrogenases signature.	molecular_function:GO:0004022//alcohol dehydrogenase (NAD) activity;GO:0008270//zinc ion binding;GO:0016491//oxidoreductase activity;
CL10517.Contig2_All	529	2.02	2.12	2.64	0.37	0.37	0.24	16.8017	3.25899	-2.36611	0.000448665	Down	OAO16883.1/4.3e-48/40S ribosomal protein S15 [Blastocystis sp. ATCC 50177/Nand II]	NA	sp|Q945U1|RS15_ELAOL/1.2e-47/40S ribosomal protein S15 OS=Elaeis oleifera GN=RPS15 PE=2 SV=1	pda:103716570/1.8e-48/40S ribosomal protein S15-like; K02958 small subunit ribosomal protein S15e	7302912/8.0e-50/[J] KOG0898 40S ribosomal protein S15	PR00975/1.4E-10/Ribosomal protein S19 family signature	biological_process:GO:0006412//translation;cellular_component:GO:0015935//small ribosomal subunit;molecular_function:GO:0003723//RNA binding;GO:0003735//structural constituent of ribosome;
CL10522.Contig1_All	2095	1.25	1.41	1.09	0.14	0.11	0.19	42.7146	6.02935	-2.82465	2.31077e-09	Down	BAK04853.1/1.3e-270/predicted protein [Hordeum vulgare subsp. vulgare]	KF715270.1/0.0/Pyropia haitanensis heat shock protein 70-4 (HSP70-4) mRNA, complete cds	sp|Q01899|HSP7M_PHAVU/4.0e-219/Heat shock 70 kDa protein, mitochondrial OS=Phaseolus vulgaris PE=2 SV=1	gsl:Gasu_51530/2.8e-225/molecular chaperone DnaK; K04043 molecular chaperone DnaK	SPAC664.11/1.3e-247/[O] KOG0102 Molecular chaperones mortalin/PBP74/GRP75, HSP70 superfamily	PS00297/-/Heat shock hsp70 proteins family signature 1.	biological_process:GO:0006457//protein folding;molecular_function:GO:0005524//ATP binding;GO:0051082//unfolded protein binding;
CL10525.Contig1_All	778	1.67	0.95	1.54	3.55	5.12	3.61	17.2738	51.5025	1.57606	5.37741e-05	Up	NA	NA	NA	NA	NA	NA	NA
CL10525.Contig2_All	4258	2.22	2.08	2.57	4.94	5.17	4.84	165.056	378.226	1.19629	5.97356e-23	Up	NA	XM_020696680.1/0.0/PREDICTED: Sesamum indicum mRNA-decapping enzyme-like protein (LOC105170039), transcript variant X3, mRNA	NA	NA	NA	NA	NA
CL10526.Contig3_All	591	13.68	12.32	17.99	5.7	5.36	4.31	128.821	47.6242	-1.43561	7.11149e-09	Down	XP_018817064.1/1.1e-23/PREDICTED: pollen-specific leucine-rich repeat extensin-like protein 2 isoform X3 [Juglans regia]	NA	sp|P40602|APG_ARATH/6.2e-08/Anther-specific proline-rich protein APG OS=Arabidopsis thaliana GN=APG PE=2 SV=2	cre:CHLREDRAFT_34127/2.3e-07/GOX16; glyoxal or galactose oxidase; K20929 glyoxal/methylglyoxal oxidase [EC:1.2.3.15]	At1g20130/1.4e-07/[RI] LSE0388 A Predicted lipase	NA	NA
CL10527.Contig6_All	626	0.94	1.24	1.56	4.28	3.83	4.52	12.0714	41.1577	1.76957	1.5631e-05	Up	XP_010475502.1/6.7e-16/PREDICTED: tropinone reductase homolog At1g07440 [Camelina sativa]	XR_002287744.1/0.0/PREDICTED: Sesamum indicum tropinone reductase homolog At5g06060 (LOC105170641), transcript variant X9, misc_RNA	sp|P0DKI3|TRNH1_ARATH/1.7e-16/Tropinone reductase homolog At1g07440 OS=Arabidopsis thaliana GN=At1g07440 PE=1 SV=1	csat:104754912/9.9e-17/tropinone reductase homolog At1g07440; K08081 tropinone reductase I [EC:1.1.1.206]	At1g07440/4.0e-16/[R] KOG0725 Reductases with broad range of substrate specificities	NA	NA
CL10531.Contig1_All	1852	1.76	1.48	1.75	3.12	3.01	3.89	51.1793	107.402	1.06939	9.0218e-06	Up	NA	NA	NA	NA	7296830/1.1e-08/[S] KOG2709 Uncharacterized conserved protein	PTHR21068/1.9E-88/--	NA
CL10533.Contig1_All	2005	3.97	4.3	4.26	1.71	1.27	1.53	137.513	52.5169	-1.38871	2.60221e-11	Down	BAK04853.1/1.0e-267/predicted protein [Hordeum vulgare subsp. vulgare]	XM_008617063.1/0.0/Saprolegnia diclina VS20 chaperone dnaK mRNA	sp|Q01899|HSP7M_PHAVU/7.7e-220/Heat shock 70 kDa protein, mitochondrial OS=Phaseolus vulgaris PE=2 SV=1	gsl:Gasu_51530/7.3e-231/molecular chaperone DnaK; K04043 molecular chaperone DnaK	YJR045c/8.9e-259/[O] KOG0102 Molecular chaperones mortalin/PBP74/GRP75, HSP70 superfamily	PS01036/-/Heat shock hsp70 proteins family signature 3.	biological_process:GO:0006457//protein folding;molecular_function:GO:0005524//ATP binding;GO:0051082//unfolded protein binding;
CL10533.Contig2_All	2140	5.84	4.83	5.65	2.33	1.77	2.08	192.254	77.4367	-1.31192	1.32796e-12	Down	BAK04853.1/2.6e-269/predicted protein [Hordeum vulgare subsp. vulgare]	XM_008617063.1/0.0/Saprolegnia diclina VS20 chaperone dnaK mRNA	sp|Q01899|HSP7M_PHAVU/2.2e-220/Heat shock 70 kDa protein, mitochondrial OS=Phaseolus vulgaris PE=2 SV=1	gsl:Gasu_51530/7.6e-234/molecular chaperone DnaK; K04043 molecular chaperone DnaK	YJR045c/4.3e-259/[O] KOG0102 Molecular chaperones mortalin/PBP74/GRP75, HSP70 superfamily	PS01036/-/Heat shock hsp70 proteins family signature 3.	biological_process:GO:0006457//protein folding;molecular_function:GO:0005524//ATP binding;GO:0051082//unfolded protein binding;
CL10533.Contig3_All	1737	3.54	2.54	3.05	0.74	1	1.31	85.9535	30.7635	-1.48234	1.82995e-06	Down	BAK04853.1/1.2e-176/predicted protein [Hordeum vulgare subsp. vulgare]	BT102198.1/0.0/Picea glauca clone GQ0168_I02 mRNA sequence	sp|P41753|HSP70_ACHKL/4.3e-174/Heat shock 70 kDa protein OS=Achlya klebsiana GN=HSP70 PE=2 SV=1	csat:104744282/4.5e-168/probable mediator of RNA polymerase II transcription subunit 37c; K03283 heat shock 70kDa protein 1/2/6/8	SPAC13G7.02c/2.7e-179/[O] KOG0101 Molecular chaperones HSP70/HSC70, HSP70 superfamily	PTHR19375/0.0/--	NA
CL10534.Contig4_All	832	0	0.27	0	1.15	0.61	0.44	1.65637	9.08365	2.45524	0.0100231	Up	XP_021616799.1/1.2e-28/uncharacterized protein LOC110618078 [Manihot esculenta] >OAY46628.1 hypothetical protein MANES_06G014900 [Manihot esculenta]	XM_006470739.2/0.0/PREDICTED: Citrus sinensis GTPase Der (LOC102610962), mRNA	NA	NA	At5g39960/7.7e-23/[J] KOG1191 Mitochondrial GTPase	NA	molecular_function:GO:0005525//GTP binding;
CL10543.Contig1_All	3367	3.67	4.86	4.27	1.34	1.2	1.24	240.113	75.4895	-1.66937	2.15078e-21	Down	NA	KF471348.1/0.0/Acer pictum subsp. mono microsatellite Am2038 sequence	NA	NA	NA	NA	NA
CL10543.Contig5_All	2076	1.64	1.86	2.3	0.55	0.35	0.56	65.3456	17.7322	-1.88172	7.91735e-08	Down	NA	KF471348.1/0.0/Acer pictum subsp. mono microsatellite Am2038 sequence	NA	NA	NA	NA	NA
CL10546.Contig2_All	2453	35.67	33.37	33.95	15.7	15.29	15.21	1403.58	665.214	-1.07722	2.45202e-73	Down	GAX17559.1/1.1e-119/catalase [Fistulifera solaris]	XM_009541442.1/0.0/Phytophthora sojae hypothetical protein partial mRNA	sp|Q01297|CATA1_RICCO/3.1e-85/Catalase isozyme 1 OS=Ricinus communis GN=CAT1 PE=2 SV=2	mdm:103412102/4.2e-87/catalase isozyme 1-like; K03781 catalase [EC:1.11.1.6]	CE22476/2.5e-114/[P] KOG0047 Catalase	PF06628/6.8E-14/Catalase-related immune-responsive	biological_process:GO:0006979//response to oxidative stress;GO:0042744//hydrogen peroxide catabolic process;molecular_function:GO:0046872//metal ion binding;GO:0020037//heme binding;GO:0004096//catalase activity;
CL10547.Contig2_All	3914	0.35	0.93	0.95	0.34	0.16	0.11	47.4749	14.8796	-1.67383	0.00346765	Down	GAV80894.1/0.0e+00/E1-E2_ATPase domain-containing protein/Cation_ATPase_C domain-containing protein/Cation_ATPase_N domain-containing protein/Hydrolase domain-containing protein/CaATP_NAI domain-containing protein [Cephalotus follicularis]	XM_006426065.1/0.0/Citrus clementina hypothetical protein (CICLE_v10024795mg) mRNA, complete cds	sp|O81108|ACA2_ARATH/0.0e+00/Calcium-transporting ATPase 2, plasma membrane-type OS=Arabidopsis thaliana GN=ACA2 PE=1 SV=1	cit:102620594/0.0e+00/calcium-transporting ATPase 2, plasma membrane-type-like; K01537 Ca2+-transporting ATPase [EC:3.6.3.8]	At4g37640/0.0e+00/[P] KOG0204 Calcium transporting ATPase	PTHR24093/0.0/--	cellular_component:GO:0016021//integral component of membrane;molecular_function:GO:0005524//ATP binding;GO:0005388//calcium-transporting ATPase activity;GO:0005516//calmodulin binding;
CL10549.Contig2_All	283	1.62	3.46	2.48	0	0.27	1.07	8.39286	2.25761	-1.89437	0.0480411	Down	KQL01045.1/3.3e-15/hypothetical protein SETIT_015044mg, partial [Setaria italica]	NA	sp|P52855|RLA1_MAIZE/6.6e-16/60S acidic ribosomal protein P1 OS=Zea mays GN=RPP1A PE=1 SV=1	mcha:111013791/4.2e-15/60S acidic ribosomal protein P1-like; K02942 large subunit ribosomal protein LP1	SPAC644.15/4.9e-22/[J] KOG1762 60s acidic ribosomal protein P1	PTHR21141/1.9E-26/--	NA
CL10549.Contig3_All	596	0.47	0.67	1.89	0	0.38	0	7.94086	1.76375	-2.17065	0.0377354	Down	XP_010519571.1/2.0e-25/PREDICTED: 60S acidic ribosomal protein P1 [Tarenaya hassleriana]	AK107874.1/0.0/Oryza sativa Japonica Group cDNA clone:002-134-C11, full insert sequence	sp|P52855|RLA1_MAIZE/3.9e-26/60S acidic ribosomal protein P1 OS=Zea mays GN=RPP1A PE=1 SV=1	thj:104798987/2.9e-26/60S acidic ribosomal protein P1; K02942 large subunit ribosomal protein LP1	SPAC644.15/4.1e-34/[J] KOG1762 60s acidic ribosomal protein P1	NA	biological_process:GO:0045860//positive regulation of protein kinase activity;GO:0002181//cytoplasmic translation;GO:0006414//translational elongation;cellular_component:GO:0005840//ribosome;GO:0022625//cytosolic large ribosomal subunit;molecular_function:GO:0030295//protein kinase activator activity;GO:0003735//structural constituent of ribosome;
CL10549.Contig4_All	612	2.66	1.29	1.08	0.23	0.17	0.73	14.4234	4.04449	-1.83438	0.0259591	Down	XP_015888892.1/9.7e-28/PREDICTED: 60S acidic ribosomal protein P1-like [Ziziphus jujuba]	AK107874.1/0.0/Oryza sativa Japonica Group cDNA clone:002-134-C11, full insert sequence	sp|P52855|RLA1_MAIZE/3.2e-28/60S acidic ribosomal protein P1 OS=Zea mays GN=RPP1A PE=1 SV=1	zju:107423779/1.4e-28/60S acidic ribosomal protein P1-like; K02942 large subunit ribosomal protein LP1	SPAC644.15/1.5e-36/[J] KOG1762 60s acidic ribosomal protein P1	NA	NA
CL10549.Contig5_All	640	7.18	6.52	6.8	1.22	1.44	1.21	65.3516	13.3338	-2.29313	2.2002e-11	Down	XP_015888892.1/7.8e-28/PREDICTED: 60S acidic ribosomal protein P1-like [Ziziphus jujuba]	AK107874.1/0.0/Oryza sativa Japonica Group cDNA clone:002-134-C11, full insert sequence	sp|P52855|RLA1_MAIZE/9.0e-29/60S acidic ribosomal protein P1 OS=Zea mays GN=RPP1A PE=1 SV=1	zju:107423779/1.2e-28/60S acidic ribosomal protein P1-like; K02942 large subunit ribosomal protein LP1	SPAC644.15/2.1e-36/[J] KOG1762 60s acidic ribosomal protein P1	PF00428/1.9E-26/60s Acidic ribosomal protein	NA
CL10549.Contig6_All	653	8.94	9.88	9.84	1.62	1.81	1.64	93.9258	17.7138	-2.40664	1.13419e-16	Down	XP_010519571.1/4.6e-28/PREDICTED: 60S acidic ribosomal protein P1 [Tarenaya hassleriana]	AK107874.1/0.0/Oryza sativa Japonica Group cDNA clone:002-134-C11, full insert sequence	sp|P52855|RLA1_MAIZE/2.0e-28/60S acidic ribosomal protein P1 OS=Zea mays GN=RPP1A PE=1 SV=1	thj:104798987/6.9e-29/60S acidic ribosomal protein P1; K02942 large subunit ribosomal protein LP1	SPAC644.15/6.9e-35/[J] KOG1762 60s acidic ribosomal protein P1	NA	NA
CL10549.Contig7_All	666	2.03	2.26	1.72	0.32	0.23	0	18.9266	2.36307	-3.00168	2.57132e-05	Down	XP_015888892.1/1.6e-28/PREDICTED: 60S acidic ribosomal protein P1-like [Ziziphus jujuba]	AK107874.1/0.0/Oryza sativa Japonica Group cDNA clone:002-134-C11, full insert sequence	sp|P52855|RLA1_MAIZE/9.3e-29/60S acidic ribosomal protein P1 OS=Zea mays GN=RPP1A PE=1 SV=1	zju:107423779/2.4e-29/60S acidic ribosomal protein P1-like; K02942 large subunit ribosomal protein LP1	SPAC644.15/2.9e-36/[J] KOG1762 60s acidic ribosomal protein P1	PTHR21141/9.8E-51/--	NA
CL10549.Contig8_All	682	2.09	1.87	2.11	0.2	0.18	0.22	19.955	2.64508	-2.91537	1.26507e-05	Down	XP_010519571.1/4.8e-28/PREDICTED: 60S acidic ribosomal protein P1 [Tarenaya hassleriana]	AK107874.1/0.0/Oryza sativa Japonica Group cDNA clone:002-134-C11, full insert sequence	sp|P52855|RLA1_MAIZE/3.1e-27/60S acidic ribosomal protein P1 OS=Zea mays GN=RPP1A PE=1 SV=1	thj:104798987/7.2e-29/60S acidic ribosomal protein P1; K02942 large subunit ribosomal protein LP1	SPAC644.15/5.0e-36/[J] KOG1762 60s acidic ribosomal protein P1	NA	NA
CL10550.Contig1_All	811	3.88	4.85	4.32	1.23	0.45	0.67	54.2935	11.1107	-2.28883	2.77149e-08	Down	XP_015698187.1/6.2e-22/PREDICTED: pollen-specific leucine-rich repeat extensin-like protein 3 [Oryza brachyantha]	NA	sp|Q9FPQ6|GP1_CHLRE/6.7e-21/Vegetative cell wall protein gp1 OS=Chlamydomonas reinhardtii GN=GP1 PE=1 SV=1	han:110926720/6.6e-13/uncharacterized protein LOC110926720; K22020 mucin-19	At3g28780/2.7e-12/[S] LSE0099 A Uncharacterized protein	NA	NA
CL10552.Contig1_All	538	2.78	2.41	3.02	0.86	0.49	1.28	21.1	7.50466	-1.49139	0.0104005	Down	CDY07599.1/4.5e-37/BnaA03g19120D [Brassica napus]	NA	sp|Q9LYK9|RS263_ARATH/1.4e-38/40S ribosomal protein S26-3 OS=Arabidopsis thaliana GN=RPS26C PE=2 SV=1	brp:103865824/1.1e-37/40S ribosomal protein S26-3-like; K02976 small subunit ribosomal protein S26e	SPAC1805.11c/2.0e-48/[J] KOG1768 40s ribosomal protein S26	NA	NA
CL10553.Contig4_All	1071	0.61	1.63	0.87	0.27	0.28	0.18	16.6887	4.32016	-1.94971	0.0068106	Down	XP_006485815.1/2.0e-52/PREDICTED: uncharacterized protein LOC102610804 isoform X1 [Citrus sinensis]	XM_006485754.2/0.0/PREDICTED: Citrus sinensis uncharacterized LOC102610804 (LOC102610804), transcript variant X3, mRNA	sp|Q8LPQ5|BTS_ARATH/1.3e-51/Zinc finger protein BRUTUS OS=Arabidopsis thaliana GN=BTS PE=1 SV=1	cit:102610804/3.0e-53/uncharacterized LOC102610804; K16276 zinc finger protein-like protein	At3g18290/3.0e-51/[R] KOG1940 Zn-finger protein	PTHR21319/2.0E-65/--	NA
CL10553.Contig5_All	1161	0.72	1.25	0.91	0.42	0.19	0.32	16.8618	5.85833	-1.52519	0.0230993	Down	XP_006485817.1/9.4e-40/PREDICTED: uncharacterized protein LOC102610804 isoform X3 [Citrus sinensis]	XM_006485754.2/0.0/PREDICTED: Citrus sinensis uncharacterized LOC102610804 (LOC102610804), transcript variant X3, mRNA	sp|Q8LPQ5|BTS_ARATH/4.6e-39/Zinc finger protein BRUTUS OS=Arabidopsis thaliana GN=BTS PE=1 SV=1	cit:102610804/1.4e-40/uncharacterized LOC102610804; K16276 zinc finger protein-like protein	At3g18290/1.1e-38/[R] KOG1940 Zn-finger protein	PTHR21319:SF9/2.3E-46/--	NA
CL10556.Contig1_All	2493	4.49	3.98	4.25	9.62	8.47	9.59	176.296	404.159	1.19693	2.2567e-24	Up	BAK04853.1/3.3e-239/predicted protein [Hordeum vulgare subsp. vulgare]	KP241942.1/0.0/Pyropia seriata heat shock protein 70c (HSP70c) mRNA, complete cds	sp|Q01899|HSP7M_PHAVU/2.5e-220/Heat shock 70 kDa protein, mitochondrial OS=Phaseolus vulgaris PE=2 SV=1	gsl:Gasu_51530/2.4e-239/molecular chaperone DnaK; K04043 molecular chaperone DnaK	YJR045c/3.1e-269/[O] KOG0102 Molecular chaperones mortalin/PBP74/GRP75, HSP70 superfamily	PTHR19375:SF173/0.0/--	biological_process:GO:0006457//protein folding;molecular_function:GO:0005524//ATP binding;GO:0051082//unfolded protein binding;
CL10556.Contig2_All	1624	3.17	4.26	3.79	9.6	9.3	9.52	99.4297	265.268	1.4157	6.1359e-21	Up	BAK04853.1/8.3e-143/predicted protein [Hordeum vulgare subsp. vulgare]	XM_013773775.1/0.0/PREDICTED: Brassica oleracea var. oleracea heat shock 70 kDa protein 9, mitochondrial (LOC106335297), mRNA	sp|Q01899|HSP7M_PHAVU/5.6e-128/Heat shock 70 kDa protein, mitochondrial OS=Phaseolus vulgaris PE=2 SV=1	gsl:Gasu_51530/3.7e-140/molecular chaperone DnaK; K04043 molecular chaperone DnaK	YJR045c/6.3e-162/[O] KOG0102 Molecular chaperones mortalin/PBP74/GRP75, HSP70 superfamily	PTHR19375:SF173/1.7E-204/--	biological_process:GO:0006457//protein folding;molecular_function:GO:0005524//ATP binding;GO:0051082//unfolded protein binding;
CL10556.Contig3_All	243	0	0	0.34	1.02	2.32	1.33	0.85424	4.16258	2.28476	0.0396746	Up	NA	NA	NA	NA	NA	NA	NA
CL10560.Contig4_All	634	0.73	1.72	1.12	3.06	2.82	2.75	11.659	28.1403	1.27119	0.012778	Up	NA	NA	NA	NA	NA	NA	NA
CL10565.Contig2_All	540	0.96	0.48	0.98	0	0.12	0.12	5.892	1.21862	-2.27351	0.0255887	Down	ACG48240.1/2.2e-44/transcription factor BTF3 [Zea mays]	NA	sp|Q9CAT7|BTF3L_ARATH/2.8e-23/Nascent polypeptide-associated complex subunit beta OS=Arabidopsis thaliana GN=At1g73230 PE=2 SV=1	gsl:Gasu_08600/5.3e-27/nascent polypeptide-associated complex subunit beta; K01527 nascent polypeptide-associated complex subunit beta	Hs16159637/9.0e-33/[K] KOG2240 RNA polymerase II general transcription factor BTF3 and related proteins	PF01849/2.2E-20/NAC domain	biological_process:GO:0006355//regulation of transcription, DNA-templated;GO:0006351//transcription, DNA-templated;
CL10566.Contig2_All	599	4.04	6.84	6.12	0.46	0.67	0.77	49.673	6.4548	-2.94402	5.69299e-10	Down	XP_008610388.1/5.6e-12/hypothetical protein SDRG_06387 [Saprolegnia diclina VS20] >EQC36282.1 hypothetical protein SDRG_06387 [Saprolegnia diclina VS20]	NA	sp|Q9FE58|RL223_ARATH/2.4e-23/60S ribosomal protein L22-3 OS=Arabidopsis thaliana GN=RPL22C PE=2 SV=1	lang:109349122/1.2e-06/probable cytosolic oligopeptidase A; K01414 oligopeptidase A [EC:3.4.24.70]	SPBC3D6.14c/4.9e-11/[GO] KOG4157 beta-1,6-N-acetylglucosaminyltransferase, contains WSC domain	NA	cellular_component:GO:0016021//integral component of membrane;
CL10566.Contig4_All	481	1.69	0.47	1.89	0	0.19	0	8.30592	1.06298	-2.96602	0.00275851	Down	XP_005707683.1/3.9e-32/60S ribosomal protein L22 isoform 1 [Galdieria sulphuraria] >EME31163.1 60S ribosomal protein L22 isoform 1 [Galdieria sulphuraria]	XM_001703627.1/0.0/Chlamydomonas reinhardtii ribosomal protein L22 (RPL22), mRNA	sp|Q9FE58|RL223_ARATH/4.7e-30/60S ribosomal protein L22-3 OS=Arabidopsis thaliana GN=RPL22C PE=2 SV=1	cme:CYME_CMS080C/6.0e-30/60S ribosomal protein L22; K02891 large subunit ribosomal protein L22e	Hs4506613/7.8e-28/[J] KOG3434 60S ribosomal protein L22	PF01776/2.6E-48/Ribosomal L22e protein family	biological_process:GO:0006412//translation;cellular_component:GO:0005840//ribosome;molecular_function:GO:0003735//structural constituent of ribosome;
CL10567.Contig1_All	2051	0.96	1.23	0.93	2.38	2.69	2.7	35.1211	92.2252	1.39282	6.90471e-08	Up	AQY61301.1/2.5e-83/Gag [Vitis vinifera]	NA	NA	bna:106406178/5.7e-45/uncharacterized protein LOC106406178; K00799 glutathione S-transferase [EC:2.5.1.18]	NA	PTHR33325:SF2/1.1E-39/--	NA
CL10571.Contig3_All	1679	1.71	1.57	1.34	4.34	3.89	4.14	42.8684	119.527	1.47935	3.72252e-11	Up	XP_005709142.1/5.0e-151/S-adenosylmethionine synthetase [Galdieria sulphuraria] >EME32622.1 S-adenosylmethionine synthetase [Galdieria sulphuraria]	Z71271.1/0.0/C.roseus mRNA for S-adenosyl-L-methionine synthetase 1	sp|Q9LGU6|METK3_ORYSJ/2.8e-138/S-adenosylmethionine synthase 3 OS=Oryza sativa subsp. japonica GN=METK3 PE=2 SV=1	gsl:Gasu_03900/7.4e-152/S-adenosylmethionine synthetase; K00789 S-adenosylmethionine synthetase [EC:2.5.1.6]	SPBC14F5.05c/3.7e-181/[H] KOG1506 S-adenosylmethionine synthetase	PS00376/-/S-adenosylmethionine synthase signature 1.	biological_process:GO:0006730//one-carbon metabolic process;GO:0006556//S-adenosylmethionine biosynthetic process;molecular_function:GO:0046872//metal ion binding;GO:0005524//ATP binding;GO:0004478//methionine adenosyltransferase activity;
CL10572.Contig2_All	300	3.35	1.21	2.91	0.54	0	0.42	8.3897	1.6534	-2.34318	0.0139919	Down	NA	NA	NA	NA	NA	NA	NA
CL10574.Contig3_All	1643	3.19	2.74	3.03	7.58	9.09	8.44	80.5414	237.225	1.55845	1.65415e-21	Up	XP_021611772.1/6.3e-215/cytochrome P450 83B1-like isoform X1 [Manihot esculenta] >OAY50612.1 hypothetical protein MANES_05G150000 [Manihot esculenta]	XM_018125414.1/0.0/PREDICTED: Theobroma cacao cytochrome P450 83B1 (LOC18591508), mRNA	sp|O65782|C83B1_ARATH/7.9e-154/Cytochrome P450 83B1 OS=Arabidopsis thaliana GN=CYP83B1 PE=1 SV=1	lja:Lj3g3v1475790.2/4.4e-165/Lj3g3v1475790.2; -; K20617 cytochrome P450 family 71 subfamily A	At4g31500/1.8e-153/[Q] KOG0156 Cytochrome P450 CYP2 subfamily	PTHR24298/0.0/--	molecular_function:GO:0047085//hydroxyphenylacetonitrile 2-monooxygenase activity;GO:0020037//heme binding;GO:0005506//iron ion binding;GO:0050592//4-hydroxyphenylacetaldehyde oxime monooxygenase activity;
CL10574.Contig5_All	1694	7.85	7.96	7.77	3.31	3.75	3.26	217.961	100.755	-1.11321	2.40676e-13	Down	XP_021611772.1/1.8e-209/cytochrome P450 83B1-like isoform X1 [Manihot esculenta] >OAY50612.1 hypothetical protein MANES_05G150000 [Manihot esculenta]	XM_006443160.1/0.0/Citrus clementina hypothetical protein (CICLE_v10023326mg) mRNA, partial cds	sp|O65782|C83B1_ARATH/3.8e-151/Cytochrome P450 83B1 OS=Arabidopsis thaliana GN=CYP83B1 PE=1 SV=1	lja:Lj3g3v1475790.2/8.0e-162/Lj3g3v1475790.2; -; K20617 cytochrome P450 family 71 subfamily A	At4g31500/8.8e-151/[Q] KOG0156 Cytochrome P450 CYP2 subfamily	PR00463/2.7E-48/E-class P450 group I signature	molecular_function:GO:0047085//hydroxyphenylacetonitrile 2-monooxygenase activity;GO:0016705//oxidoreductase activity, acting on paired donors, with incorporation or reduction of molecular oxygen;GO:0020037//heme binding;GO:0005506//iron ion binding;GO:0004497//monooxygenase activity;GO:0050592//4-hydroxyphenylacetaldehyde oxime monooxygenase activity;
CL10583.Contig2_All	662	2.22	3.17	2.03	8.09	8.97	7.96	25.2639	87.4548	1.79146	3.20637e-10	Up	NA	AK119968.1/0.0/Oryza sativa Japonica Group cDNA clone:002-184-D12, full insert sequence	NA	NA	NA	PF08570/1.5E-26/Protein of unknown function (DUF1761)	NA
CL10583.Contig5_All	395	5.55	7.03	4.62	1.24	1.12	2.29	30.2665	9.27421	-1.70642	0.000896885	Down	XP_017616826.1/7.2e-08/PREDICTED: proline-rich receptor-like protein kinase PERK1 [Gossypium arboreum]	NA	NA	smo:SELMODRAFT_448085/8.4e-06/hypothetical protein; K12951 cobalt/nickel-transporting P-type ATPase D [EC:3.6.3.-]	Hs4505285/1.1e-06/[WV] KOG1216 von Willebrand factor and related coagulation proteins	PTHR40638/1.2E-53/--	biological_process:GO:0006468//protein phosphorylation;GO:0007166//cell surface receptor signaling pathway;cellular_component:GO:0016021//integral component of membrane;GO:0005886//plasma membrane;molecular_function:GO:0005524//ATP binding;GO:0004675//transmembrane receptor protein serine/threonine kinase activity;
CL10588.Contig21_All	2175	1.65	2.44	1.5	0.89	1.15	0.23	65.3863	29.345	-1.15588	0.0408489	Down	XP_015572791.1/1.9e-41/PREDICTED: putative leucine-rich repeat receptor-like protein kinase At2g19210 [Ricinus communis]	FJ896012.1/0.0/Dimocarpus longan sulfate transporter mRNA, partial cds	sp|Q9ZQR3|Y2451_ARATH/2.3e-28/Leucine-rich repeat receptor-like serine/threonine-protein kinase At2g14510 OS=Arabidopsis thaliana GN=At2g14510 PE=2 SV=1	pavi:110774567/8.7e-36/probable LRR receptor-like serine/threonine-protein kinase At1g05700; K04733 interleukin-1 receptor-associated kinase 4 [EC:2.7.11.1]	At3g21340/2.9e-29/[T] LSE0002 A Receptor protein kinase containing LRR repeats	PTHR27003:SF105/4.6E-24/--	cellular_component:GO:0016021//integral component of membrane;molecular_function:GO:0005524//ATP binding;GO:0004672//protein kinase activity;
CL10588.Contig26_All	2034	0.63	0.7	0.7	0.38	0.07	0.08	21.7415	6.53035	-1.73522	0.0170518	Down	XP_006465723.2/3.7e-55/PREDICTED: putative leucine-rich repeat receptor-like protein kinase At2g19210 [Citrus sinensis]	FJ896012.1/0.0/Dimocarpus longan sulfate transporter mRNA, partial cds	sp|Q9FZB1|Y5188_ARATH/7.0e-43/Probable LRR receptor-like serine/threonine-protein kinase At1g51880 OS=Arabidopsis thaliana GN=At1g51880 PE=2 SV=1	hbr:110659959/9.6e-53/probable LRR receptor-like serine/threonine-protein kinase At1g51820; K04733 interleukin-1 receptor-associated kinase 4 [EC:2.7.11.1]	At2g19230/6.6e-52/[T] LSE0002 A Receptor protein kinase containing LRR repeats	PTHR27003:SF105/4.6E-24/--	cellular_component:GO:0016021//integral component of membrane;molecular_function:GO:0005524//ATP binding;GO:0004672//protein kinase activity;
CL10595.Contig2_All	3493	15.63	14.81	15.9	60.03	60.73	62.19	908.619	3785.84	2.05886	0	Up	XP_012479418.1/0.0e+00/PREDICTED: probable alpha,alpha-trehalose-phosphate synthase [UDP-forming] 9 [Gossypium raimondii] >KJB31284.1 hypothetical protein B456_005G183800 [Gossypium raimondii]	XM_006483757.2/0.0/PREDICTED: Citrus sinensis probable alpha,alpha-trehalose-phosphate synthase [UDP-forming] 9 (LOC102629877), transcript variant X4, mRNA	sp|O80738|TPS10_ARATH/0.0e+00/Probable alpha,alpha-trehalose-phosphate synthase [UDP-forming] 10 OS=Arabidopsis thaliana GN=TPS10 PE=2 SV=1	gra:105794671/0.0e+00/probable alpha,alpha-trehalose-phosphate synthase [UDP-forming] 9; K16055 trehalose 6-phosphate synthase/phosphatase [EC:2.4.1.15 3.1.3.12]	At1g60140/0.0e+00/[G] KOG1050 Trehalose-6-phosphate synthase component TPS1 and related subunits	PTHR10788/0.0/--	biological_process:GO:0005992//trehalose biosynthetic process;molecular_function:GO:0003824//catalytic activity;
CL106.Contig2_All	1012	2.59	2.67	3.32	0.6	1.02	0.96	44.8324	14.5957	-1.61899	5.82853e-05	Down	GAQ89612.1/5.7e-57/enoyl-CoA hydratase [Klebsormidium nitens]	NA	sp|F4JML5|ECH2M_ARATH/2.5e-57/Probable enoyl-CoA hydratase 2, mitochondrial OS=Arabidopsis thaliana GN=At4g16800 PE=2 SV=1	csat:104731900/1.9e-57/probable enoyl-CoA hydratase 2, mitochondrial; K05607 methylglutaconyl-CoA hydratase [EC:4.2.1.18]	Hs4502327/6.9e-58/[I] KOG1679 Enoyl-CoA hydratase	PF00378/5.3E-51/Enoyl-CoA hydratase/isomerase	biological_process:GO:0008152//metabolic process;molecular_function:GO:0003824//catalytic activity;
CL106.Contig4_All	888	2.34	3.22	3.42	0.35	1.29	0.81	41.0943	12.7394	-1.68965	0.000538319	Down	GAQ89612.1/3.1e-51/enoyl-CoA hydratase [Klebsormidium nitens]	NA	sp|F4JML5|ECH2M_ARATH/2.6e-50/Probable enoyl-CoA hydratase 2, mitochondrial OS=Arabidopsis thaliana GN=At4g16800 PE=2 SV=1	csl:COCSUDRAFT_6243/2.3e-51/ClpP/crotonase; K05607 methylglutaconyl-CoA hydratase [EC:4.2.1.18]	Hs4502327/7.1e-51/[I] KOG1679 Enoyl-CoA hydratase	PTHR11941/3.5E-104/--	biological_process:GO:0008152//metabolic process;molecular_function:GO:0003824//catalytic activity;
CL10601.Contig3_All	1386	1.67	2.21	1.61	0.2	0.31	0.39	40.1377	7.3493	-2.44928	1.80581e-07	Down	GAV63846.1/1.3e-48/zf-HIT domain-containing protein [Cephalotus follicularis]	XR_002491562.1/0.0/PREDICTED: Hevea brasiliensis zinc finger HIT domain-containing protein 3 (LOC110637720), transcript variant X2, misc_RNA	NA	NA	At4g28820/7.0e-29/[K] KOG2857 Predicted MYND Zn-finger protein/hormone receptor interactor	PS51083/11.196/Zinc finger HIT-type profile.	NA
CL10603.Contig1_All	640	0.73	2.1	0.76	0.21	0.31	0	10.5103	2.38141	-2.14192	0.0196309	Down	GAQ87545.1/5.2e-40/60S ribosomal protein L23A [Klebsormidium nitens]	BT101875.1/0.0/Picea glauca clone GQ0132_E05 mRNA sequence	sp|O22644|RL23A_FRIAG/9.6e-39/60S ribosomal protein L23A OS=Fritillaria agrestis GN=RPL23A PE=2 SV=1	bdi:100823942/1.1e-39/60S ribosomal protein L23A; K02893 large subunit ribosomal protein L23Ae	Hs17105394/2.5e-45/[J] KOG1751 60s ribosomal protein L23	NA	biological_process:GO:0000027//ribosomal large subunit assembly;GO:0006412//translation;cellular_component:GO:0005840//ribosome;GO:0022625//cytosolic large ribosomal subunit;molecular_function:GO:0003723//RNA binding;GO:0003735//structural constituent of ribosome;
CL10603.Contig3_All	583	2.17	1.64	1.99	0.11	0.33	0.11	15.411	2.01293	-2.93659	0.000138255	Down	XP_006828752.1/1.0e-42/60S ribosomal protein L23A [Amborella trichopoda] >ERM96168.1 hypothetical protein AMTR_s00001p00069970 [Amborella trichopoda]	BT101875.1/0.0/Picea glauca clone GQ0132_E05 mRNA sequence	sp|O22644|RL23A_FRIAG/1.1e-41/60S ribosomal protein L23A OS=Fritillaria agrestis GN=RPL23A PE=2 SV=1	atr:18424095/1.5e-43/60S ribosomal protein L23A; K02893 large subunit ribosomal protein L23Ae	Hs17105394/2.2e-48/[J] KOG1751 60s ribosomal protein L23	PF00276/1.7E-13/Ribosomal protein L23	biological_process:GO:0006412//translation;GO:0000027//ribosomal large subunit assembly;cellular_component:GO:0005840//ribosome;GO:0022625//cytosolic large ribosomal subunit;molecular_function:GO:0003723//RNA binding;GO:0003735//structural constituent of ribosome;
CL10604.Contig2_All	934	14.01	12.53	11.76	5.8	5.6	6.16	188.067	91.3641	-1.04154	1.10823e-09	Down	BAK06123.1/9.7e-112/predicted protein [Hordeum vulgare subsp. vulgare]	AK060350.1/0.0/Oryza sativa Japonica Group cDNA clone:001-008-F06, full insert sequence	sp|P29766|RL8_SOLLC/1.9e-104/60S ribosomal protein L8 OS=Solanum lycopersicum GN=RPL8 PE=2 SV=1	zju:107416893/2.1e-103/60S ribosomal protein L8-1-like; K02938 large subunit ribosomal protein L8e	SPBC2F12.07c/4.9e-111/[J] KOG2309 60s ribosomal protein L2/L8	PTHR13691/1.5E-175/--	NA
CL10606.Contig1_All	4037	1.02	0.85	0.61	2.43	2.04	2.32	56.4991	161.747	1.51744	4.24063e-12	Up	XP_006470767.1/2.7e-259/PREDICTED: TMV resistance protein N-like [Citrus sinensis]	XM_006470704.2/0.0/PREDICTED: Citrus sinensis TMV resistance protein N-like (LOC102621748), mRNA	sp|Q40392|TMVRN_NICGU/7.1e-156/TMV resistance protein N OS=Nicotiana glutinosa GN=N PE=1 SV=1	spen:107030488/8.3e-141/TMV resistance protein N-like; K22038 volume-regulated anion channel	At5g17680/3.2e-159/[VT] LSE0039 A Disease resistance protein (TIR-NBS-LRR class)	PTHR11017/3.0E-99/--	biological_process:GO:0007165//signal transduction;GO:0006952//defense response;molecular_function:GO:0043531//ADP binding;
CL10606.Contig10_All	1510	1.45	1.48	1.54	3.12	4.14	3.65	36.7453	93.8896	1.3534	1.45266e-07	Up	XP_006470767.1/1.2e-135/PREDICTED: TMV resistance protein N-like [Citrus sinensis]	XM_006470704.2/0.0/PREDICTED: Citrus sinensis TMV resistance protein N-like (LOC102621748), mRNA	sp|Q40392|TMVRN_NICGU/1.8e-91/TMV resistance protein N OS=Nicotiana glutinosa GN=N PE=1 SV=1	spen:107030488/1.6e-100/TMV resistance protein N-like; K22038 volume-regulated anion channel	At5g17680/1.2e-87/[VT] LSE0039 A Disease resistance protein (TIR-NBS-LRR class)	PTHR11017:SF162/7.2E-216/--	biological_process:GO:0007165//signal transduction;molecular_function:GO:0043531//ADP binding;
CL10608.Contig19_All	2790	0.34	0.4	0.26	0.04	0.06	0	14.4201	1.68277	-3.09917	0.000108887	Down	XP_019052368.1/1.1e-203/PREDICTED: LOW QUALITY PROTEIN: nuclear poly(A) polymerase 4-like [Nelumbo nucifera]	XM_006475936.2/0.0/PREDICTED: Citrus sinensis nuclear poly(A) polymerase 4-like (LOC102621281), transcript variant X4, mRNA	sp|Q8VYW1|PAPS4_ARATH/2.3e-193/Nuclear poly(A) polymerase 4 OS=Arabidopsis thaliana GN=PAPS4 PE=1 SV=1	jcu:105638230/2.8e-204/nuclear poly(A) polymerase 4 isoform X1; K14376 poly(A) polymerase [EC:2.7.7.19]	At4g32850/5.3e-193/[A] KOG2245 Poly(A) polymerase and related nucleotidyltransferases	PF04926/8.9E-9/Poly(A) polymerase predicted RNA binding domain	biological_process:GO:0031123//RNA 3'-end processing;GO:0043631//RNA polyadenylation;cellular_component:GO:0005634//nucleus;molecular_function:GO:0003723//RNA binding;GO:0004652//polynucleotide adenylyltransferase activity;
CL10608.Contig6_All	7254	0.11	0.19	0.12	0.38	0.28	0.35	16.8464	43.2201	1.35927	0.00106411	Up	XP_006475995.1/0.0e+00/PREDICTED: receptor-like protein kinase HSL1 [Citrus sinensis]	XM_006475936.2/0.0/PREDICTED: Citrus sinensis nuclear poly(A) polymerase 4-like (LOC102621281), transcript variant X4, mRNA	sp|Q8VYW1|PAPS4_ARATH/1.6e-254/Nuclear poly(A) polymerase 4 OS=Arabidopsis thaliana GN=PAPS4 PE=1 SV=1	gra:105768062/0.0e+00/receptor-like protein kinase HSL1; K00924 kinase [EC:2.7.1.-]	At5g25930/0.0e+00/[T] LSE0002 A Receptor protein kinase containing LRR repeats	PTHR27000/0.0/--	cellular_component:GO:0016021//integral component of membrane;molecular_function:GO:0005524//ATP binding;GO:0004672//protein kinase activity;
CL1061.Contig2_All	1141	5.12	4.93	5.69	10.92	11.24	11.59	95.8452	216.292	1.1742	2.20692e-14	Up	NA	NA	NA	NA	NA	PD001231/3.0E-5/INHIBITOR PROTEASE CYSTEINE PROTEINASE CYSTATIN THIOL MULTICYSTATIN MC REPEAT B	NA
CL10613.Contig1_All	2319	6.05	6.32	6.47	0.66	1.54	0.98	240.443	43.9097	-2.45308	1.12304e-25	Down	XP_006492936.1/4.7e-256/PREDICTED: ABC transporter G family member 15-like isoform X1 [Citrus sinensis]	XM_006492873.2/0.0/PREDICTED: Citrus sinensis ABC transporter G family member 15-like (LOC102626767), transcript variant X1, mRNA	sp|Q8RWI9|AB15G_ARATH/3.2e-217/ABC transporter G family member 15 OS=Arabidopsis thaliana GN=ABCG15 PE=2 SV=2	dct:110093339/7.3e-73/ABC transporter G family member 7; K21396 ATP-binding cassette, subfamily G (WHITE), eye pigment precursor transporter	At1g51500/1.2e-209/[Q] KOG0061 Transporter, ABC superfamily (Breast cancer resistance protein)	PTHR19241/0.0/--	cellular_component:GO:0016021//integral component of membrane;molecular_function:GO:0005524//ATP binding;GO:0016887//ATPase activity;
CL10613.Contig2_All	2144	2.39	0.44	0.74	0	0.16	0.17	40.2877	5.28575	-2.93016	0.00011039	Down	KDO48193.1/7.4e-131/hypothetical protein CISIN_1g009738mg [Citrus sinensis]	XM_006421255.1/0.0/Citrus clementina hypothetical protein (CICLE_v10004722mg) mRNA, complete cds	sp|Q8RWI9|AB15G_ARATH/4.0e-105/ABC transporter G family member 15 OS=Arabidopsis thaliana GN=ABCG15 PE=2 SV=2	gsl:Gasu_36200/1.2e-37/ABC transporter, ATP-binding protein; K21396 ATP-binding cassette, subfamily G (WHITE), eye pigment precursor transporter	At1g51500/7.6e-99/[Q] KOG0061 Transporter, ABC superfamily (Breast cancer resistance protein)	PTHR19241:SF247/8.3E-176/--	cellular_component:GO:0016021//integral component of membrane;GO:0005886//plasma membrane;molecular_function:GO:0005524//ATP binding;GO:0042626//ATPase activity, coupled to transmembrane movement of substances;GO:0016887//ATPase activity;
CL10613.Contig3_All	2326	4.83	3.34	4.4	0.24	0.4	0.79	160.63	20.317	-2.98298	1.66974e-18	Down	XP_006492936.1/1.5e-230/PREDICTED: ABC transporter G family member 15-like isoform X1 [Citrus sinensis]	XM_006492873.2/0.0/PREDICTED: Citrus sinensis ABC transporter G family member 15-like (LOC102626767), transcript variant X1, mRNA	sp|Q8RWI9|AB15G_ARATH/2.1e-192/ABC transporter G family member 15 OS=Arabidopsis thaliana GN=ABCG15 PE=2 SV=2	dct:110093339/4.6e-59/ABC transporter G family member 7; K21396 ATP-binding cassette, subfamily G (WHITE), eye pigment precursor transporter	At1g51500/1.3e-184/[Q] KOG0061 Transporter, ABC superfamily (Breast cancer resistance protein)	PTHR19241:SF247/0.0/--	NA
CL10613.Contig4_All	2442	1.49	1.81	1.1	0.29	0.36	0.12	58.2921	11.5568	-2.33456	7.06501e-08	Down	XP_006492936.1/5.6e-167/PREDICTED: ABC transporter G family member 15-like isoform X1 [Citrus sinensis]	XM_006492874.2/0.0/PREDICTED: Citrus sinensis ABC transporter G family member 15-like (LOC102626767), transcript variant X2, mRNA	sp|Q8RWI9|AB15G_ARATH/6.2e-147/ABC transporter G family member 15 OS=Arabidopsis thaliana GN=ABCG15 PE=2 SV=2	zma:100285631/1.4e-58/ABC-2 type transporter family protein precursor; K21396 ATP-binding cassette, subfamily G (WHITE), eye pigment precursor transporter	At3g21090/1.5e-146/[Q] KOG0061 Transporter, ABC superfamily (Breast cancer resistance protein)	PTHR19241:SF247/2.3E-249/--	NA
CL10613.Contig7_All	2698	0.75	1.34	0.95	0	0.07	0.23	44.4074	5.83664	-2.92759	2.37663e-06	Down	XP_006492936.1/2.6e-117/PREDICTED: ABC transporter G family member 15-like isoform X1 [Citrus sinensis]	XM_006492874.2/0.0/PREDICTED: Citrus sinensis ABC transporter G family member 15-like (LOC102626767), transcript variant X2, mRNA	sp|Q8RWI9|AB15G_ARATH/5.3e-107/ABC transporter G family member 15 OS=Arabidopsis thaliana GN=ABCG15 PE=2 SV=2	gsl:Gasu_36200/1.1e-51/ABC transporter, ATP-binding protein; K21396 ATP-binding cassette, subfamily G (WHITE), eye pigment precursor transporter	At3g21090/1.2e-106/[Q] KOG0061 Transporter, ABC superfamily (Breast cancer resistance protein)	PS50893/15.453/ATP-binding cassette, ABC transporter-type domain profile.	NA
CL10613.Contig8_All	2597	1.22	1.13	1.74	0.14	0	0.16	58.0087	5.26471	-3.46184	1.53617e-11	Down	XP_006492936.1/2.5e-117/PREDICTED: ABC transporter G family member 15-like isoform X1 [Citrus sinensis]	XM_006492874.2/0.0/PREDICTED: Citrus sinensis ABC transporter G family member 15-like (LOC102626767), transcript variant X2, mRNA	sp|Q8RWI9|AB15G_ARATH/5.1e-107/ABC transporter G family member 15 OS=Arabidopsis thaliana GN=ABCG15 PE=2 SV=2	gsl:Gasu_36200/1.0e-51/ABC transporter, ATP-binding protein; K21396 ATP-binding cassette, subfamily G (WHITE), eye pigment precursor transporter	At3g21090/1.2e-106/[Q] KOG0061 Transporter, ABC superfamily (Breast cancer resistance protein)	PTHR19241/1.4E-185/--	cellular_component:GO:0016021//integral component of membrane;molecular_function:GO:0005524//ATP binding;GO:0016887//ATPase activity;
CL10613.Contig9_All	2371	1.3	2.22	0.75	0.09	0.22	0	54.4096	5.39254	-3.33483	1.80805e-07	Down	KDO48193.1/8.1e-131/hypothetical protein CISIN_1g009738mg [Citrus sinensis]	XM_006492874.2/0.0/PREDICTED: Citrus sinensis ABC transporter G family member 15-like (LOC102626767), transcript variant X2, mRNA	sp|Q8RWI9|AB15G_ARATH/6.1e-107/ABC transporter G family member 15 OS=Arabidopsis thaliana GN=ABCG15 PE=2 SV=2	gsl:Gasu_36200/4.3e-52/ABC transporter, ATP-binding protein; K21396 ATP-binding cassette, subfamily G (WHITE), eye pigment precursor transporter	At3g21090/1.4e-106/[Q] KOG0061 Transporter, ABC superfamily (Breast cancer resistance protein)	PTHR19241:SF247/8.3E-176/--	cellular_component:GO:0016021//integral component of membrane;GO:0005886//plasma membrane;molecular_function:GO:0005524//ATP binding;GO:0042626//ATPase activity, coupled to transmembrane movement of substances;GO:0016887//ATPase activity;
CL10616.Contig2_All	1151	1.37	2.04	1.23	0.89	0.54	0.43	27.8136	11.8913	-1.22588	0.023731	Down	XP_006441183.1/3.2e-80/hypothetical protein CICLE_v10021946mg [Citrus clementina] >ESR54423.1 hypothetical protein CICLE_v10021946mg [Citrus clementina]	XM_018963259.1/0.0/PREDICTED: Juglans regia rhodanese-like domain-containing protein 14, chloroplastic (LOC108989597), transcript variant X2, mRNA	sp|Q94A65|STR14_ARATH/1.4e-64/Rhodanese-like domain-containing protein 14, chloroplastic OS=Arabidopsis thaliana GN=At4g27700 PE=2 SV=1	NA	NA	SM00450/3.7E-8/Rhodanese Homology Domain	NA
CL1062.Contig1_All	1809	1.09	0.84	1.2	0	0.07	0.32	29.5536	5.01544	-2.55889	0.00018266	Down	OLQ09981.1/1.1e-07/Trophinin [Symbiodinium microadriaticum]	NA	NA	NA	CE25697/3.6e-09/[PT] KOG3599 Ca2+-modulated nonselective cation channel polycystin	NA	NA
CL10621.Contig12_All	4029	0.65	0.24	0.53	0.65	0.96	1.16	31.9253	65.0215	1.02622	0.0277683	Up	XP_015386827.1/8.2e-200/PREDICTED: LRR receptor-like serine/threonine-protein kinase GSO2 [Citrus sinensis]	XM_018126803.1/0.0/PREDICTED: Theobroma cacao LRR receptor-like serine/threonine-protein kinase ERECTA (LOC18589010), mRNA	sp|C0LGQ5|GSO1_ARATH/5.1e-69/LRR receptor-like serine/threonine-protein kinase GSO1 OS=Arabidopsis thaliana GN=GSO1 PE=1 SV=1	cit:102608136/1.0e-69/LRR receptor-like serine/threonine-protein kinase FLS2; K13420 LRR receptor-like serine/threonine-protein kinase FLS2 [EC:2.7.11.1]	At1g74190/2.7e-113/[R] KOG0619 FOG: Leucine rich repeat	PTHR27004/2.8E-251/--	NA
CL10621.Contig17_All	1611	3.13	3.59	2.79	0.78	1.42	1.06	82.3499	30.3823	-1.43854	2.41453e-06	Down	XP_015388732.1/1.4e-94/PREDICTED: LOW QUALITY PROTEIN: LRR receptor-like serine/threonine-protein kinase GSO1 [Citrus sinensis]	LT594796.1/0.0/Theobroma cacao genome assembly, chromosome: IX	sp|Q42371|ERECT_ARATH/9.8e-32/LRR receptor-like serine/threonine-protein kinase ERECTA OS=Arabidopsis thaliana GN=ERECTA PE=1 SV=1	soe:110795094/1.6e-31/LRR receptor-like serine/threonine-protein kinase ERECTA isoform X1; K20718 LRR receptor-like serine/threonine-protein kinase ERECTA [EC:2.7.11.1]	At1g74190/4.6e-56/[R] KOG0619 FOG: Leucine rich repeat	PTHR27004:SF11/6.4E-125/--	cellular_component:GO:0016021//integral component of membrane;
CL10621.Contig19_All	1758	0	0.15	0	0.53	0.46	0.23	2.02828	11.3679	2.48664	0.00588374	Up	XP_015386827.1/3.0e-69/PREDICTED: LRR receptor-like serine/threonine-protein kinase GSO2 [Citrus sinensis]	XM_018126803.1/0.0/PREDICTED: Theobroma cacao LRR receptor-like serine/threonine-protein kinase ERECTA (LOC18589010), mRNA	sp|C0LGS2|Y4361_ARATH/2.9e-37/Probable LRR receptor-like serine/threonine-protein kinase At4g36180 OS=Arabidopsis thaliana GN=At4g36180 PE=2 SV=1	tcc:18611707/4.3e-33/protein BRASSINOSTEROID INSENSITIVE 1; K13415 protein brassinosteroid insensitive 1 [EC:2.7.10.1 2.7.11.1]	At3g53240/2.5e-47/[R] KOG0619 FOG: Leucine rich repeat	PS51450/4.647/Leucine-rich repeat profile.	NA
CL10621.Contig25_All	2989	0.68	0.54	0.5	3.26	3.21	2.55	29.2911	158.014	2.43152	2.87642e-24	Up	XP_015383792.1/2.8e-205/PREDICTED: LRR receptor-like serine/threonine-protein kinase FLS2 isoform X7 [Citrus sinensis]	XM_021419938.1/0.0/PREDICTED: Herrania umbratica receptor-like protein kinase 5 (LOC110410304), mRNA	sp|C0LGS2|Y4361_ARATH/8.9e-79/Probable LRR receptor-like serine/threonine-protein kinase At4g36180 OS=Arabidopsis thaliana GN=At4g36180 PE=2 SV=1	mtr:MTR_4g094610/3.9e-79/LRR receptor-like kinase family protein; K13420 LRR receptor-like serine/threonine-protein kinase FLS2 [EC:2.7.11.1]	At1g74190/8.9e-122/[R] KOG0619 FOG: Leucine rich repeat	PS51450/6.287/Leucine-rich repeat profile.	NA
CL10621.Contig34_All	3749	0.29	0.43	0.18	0.57	0.5	0.85	19.1247	41.4108	1.11457	0.0234607	Up	XP_015386827.1/7.7e-200/PREDICTED: LRR receptor-like serine/threonine-protein kinase GSO2 [Citrus sinensis]	XM_018126803.1/0.0/PREDICTED: Theobroma cacao LRR receptor-like serine/threonine-protein kinase ERECTA (LOC18589010), mRNA	sp|C0LGQ5|GSO1_ARATH/4.7e-69/LRR receptor-like serine/threonine-protein kinase GSO1 OS=Arabidopsis thaliana GN=GSO1 PE=1 SV=1	cit:102608136/9.3e-70/LRR receptor-like serine/threonine-protein kinase FLS2; K13420 LRR receptor-like serine/threonine-protein kinase FLS2 [EC:2.7.11.1]	At1g74190/2.5e-113/[R] KOG0619 FOG: Leucine rich repeat	PTHR27004/2.8E-251/--	NA
CL10621.Contig36_All	3296	0.56	0.55	0.64	1.76	1.83	2.13	32.3361	110.617	1.77435	5.67096e-13	Up	XP_015386827.1/6.5e-195/PREDICTED: LRR receptor-like serine/threonine-protein kinase GSO2 [Citrus sinensis]	XM_021419938.1/0.0/PREDICTED: Herrania umbratica receptor-like protein kinase 5 (LOC110410304), mRNA	sp|Q9FIZ3|GSO2_ARATH/6.6e-67/LRR receptor-like serine/threonine-protein kinase GSO2 OS=Arabidopsis thaliana GN=GSO2 PE=1 SV=2	sly:101263330/9.1e-69/Eix2; EIX receptor 2; K13466 EIX receptor 1/2	At1g74190/9.6e-109/[R] KOG0619 FOG: Leucine rich repeat	PF00560/0.1/Leucine Rich Repeat	NA
CL10621.Contig38_All	3873	1.39	0.92	1.47	0.95	0.27	0.15	80.398	32.5369	-1.30508	0.0354964	Down	XP_015386827.1/7.9e-200/PREDICTED: LRR receptor-like serine/threonine-protein kinase GSO2 [Citrus sinensis]	XM_018126803.1/0.0/PREDICTED: Theobroma cacao LRR receptor-like serine/threonine-protein kinase ERECTA (LOC18589010), mRNA	sp|C0LGQ5|GSO1_ARATH/4.9e-69/LRR receptor-like serine/threonine-protein kinase GSO1 OS=Arabidopsis thaliana GN=GSO1 PE=1 SV=1	cit:102608136/9.6e-70/LRR receptor-like serine/threonine-protein kinase FLS2; K13420 LRR receptor-like serine/threonine-protein kinase FLS2 [EC:2.7.11.1]	At1g74190/2.6e-113/[R] KOG0619 FOG: Leucine rich repeat	PTHR27004/2.8E-251/--	NA
CL10621.Contig45_All	3057	0.41	0.51	0.68	2.49	2.82	3.49	27.801	157.563	2.50272	1.63419e-21	Up	XP_015386827.1/2.9e-197/PREDICTED: LRR receptor-like serine/threonine-protein kinase GSO2 [Citrus sinensis]	LT594796.1/0.0/Theobroma cacao genome assembly, chromosome: IX	sp|Q9FIZ3|GSO2_ARATH/6.1e-67/LRR receptor-like serine/threonine-protein kinase GSO2 OS=Arabidopsis thaliana GN=GSO2 PE=1 SV=2	mtr:MTR_4g094610/1.5e-70/LRR receptor-like kinase family protein; K13420 LRR receptor-like serine/threonine-protein kinase FLS2 [EC:2.7.11.1]	At1g74190/3.8e-112/[R] KOG0619 FOG: Leucine rich repeat	PTHR27004/7.2E-253/--	NA
CL10621.Contig48_All	2354	1.45	1.56	1.47	0.34	0.55	0.68	57.6763	21.6064	-1.41652	6.8509e-05	Down	XP_015383793.1/1.5e-81/PREDICTED: probable LRR receptor-like serine/threonine-protein kinase At4g36180 isoform X9 [Citrus sinensis]	XM_018126803.1/0.0/PREDICTED: Theobroma cacao LRR receptor-like serine/threonine-protein kinase ERECTA (LOC18589010), mRNA	sp|C0LGS2|Y4361_ARATH/1.5e-33/Probable LRR receptor-like serine/threonine-protein kinase At4g36180 OS=Arabidopsis thaliana GN=At4g36180 PE=2 SV=1	obr:102714965/2.7e-30/brassinosteroid LRR receptor kinase; K13415 protein brassinosteroid insensitive 1 [EC:2.7.10.1 2.7.11.1]	At3g53240/2.5e-42/[R] KOG0619 FOG: Leucine rich repeat	PS51450/6.634/Leucine-rich repeat profile.	NA
CL10623.Contig1_All	421	3.08	2.09	1.49	0.66	0.48	0.48	12.6908	3.85534	-1.71886	0.0228842	Down	KDD75691.1/8.2e-26/ribosomal protein L1p/L10e [Helicosporidium sp. ATCC 50920]	AK119934.1/0.0/Oryza sativa Japonica Group cDNA clone:002-184-A10, full insert sequence	sp|B8B9K6|R10A_ORYSI/5.2e-25/60S ribosomal protein L10a OS=Oryza sativa subsp. indica GN=RPL10A PE=3 SV=1	gsl:Gasu_29500/2.8e-31/60S ribosomal protein L1Ae; K02865 large subunit ribosomal protein L10Ae	SPCC1183.08c/8.6e-31/[J] KOG1570 60S ribosomal protein L10A	NA	NA
CL10625.Contig1_All	2965	1.64	1.2	1.5	0.25	0.11	0.53	70.6269	15.875	-2.15346	3.75366e-06	Down	XP_007161575.1/1.4e-23/hypothetical protein PHAVU_001G081100g [Phaseolus vulgaris] >ESW33569.1 hypothetical protein PHAVU_001G081100g [Phaseolus vulgaris]	NA	sp|Q9LJ64|PLRX1_ARATH/2.6e-06/Pollen-specific leucine-rich repeat extensin-like protein 1 OS=Arabidopsis thaliana GN=PEX1 PE=2 SV=1	NA	CE08028_2/3.3e-07/[RP] KOG4475 FOG: Immunoglobin and related proteins	PF14111/1.2E-10/Domain of unknown function (DUF4283)	molecular_function:GO:0003723//RNA binding;
CL10627.Contig3_All	4847	23.06	16.64	21.15	8.21	5.69	6.34	1659.54	590.514	-1.49074	1.23735e-11	Down	EOX95554.1/2.8e-247/Homeodomain-like superfamily protein isoform 3 [Theobroma cacao] >EOX95558.1 Homeodomain-like superfamily protein isoform 3 [Theobroma cacao] >EOX95559.1 Homeodomain-like superfamily protein isoform 3 [Theobroma cacao]	KJ817306.1/0.0/Dimocarpus longan cultivar Honghezi late elongated hypocotyl b mRNA, complete cds, alternatively spliced	sp|P92973|CCA1_ARATH/7.8e-125/Protein CCA1 OS=Arabidopsis thaliana GN=CCA1 PE=1 SV=1	vra:106760137/5.3e-166/protein LHY isoform X1; K12133 MYB-related transcription factor LHY	At2g46830/1.8e-124/[O] KOG0724 Zuotin and related molecular chaperones (DnaJ superfamily), contains DNA-binding domains	PS51294/20.501/Myb-type HTH DNA-binding domain profile.	NA
CL10627.Contig9_All	4764	24.15	22.9	23.61	10.9	10.64	10.65	1899.44	914.138	-1.05509	1.65008e-96	Down	EOX95554.1/2.8e-247/Homeodomain-like superfamily protein isoform 3 [Theobroma cacao] >EOX95558.1 Homeodomain-like superfamily protein isoform 3 [Theobroma cacao] >EOX95559.1 Homeodomain-like superfamily protein isoform 3 [Theobroma cacao]	KJ817306.1/0.0/Dimocarpus longan cultivar Honghezi late elongated hypocotyl b mRNA, complete cds, alternatively spliced	sp|P92973|CCA1_ARATH/7.7e-125/Protein CCA1 OS=Arabidopsis thaliana GN=CCA1 PE=1 SV=1	vra:106760137/5.2e-166/protein LHY isoform X1; K12133 MYB-related transcription factor LHY	At2g46830/1.8e-124/[O] KOG0724 Zuotin and related molecular chaperones (DnaJ superfamily), contains DNA-binding domains	PS51294/20.501/Myb-type HTH DNA-binding domain profile.	NA
CL1063.Contig4_All	1971	0.99	2.5	2.8	0.91	0.11	0.82	65.5784	22.4468	-1.54671	0.0228288	Down	XP_015386492.1/9.2e-112/PREDICTED: ankyrin repeat-containing protein At5g02620-like isoform X2 [Citrus sinensis]	NA	NA	tcc:18596390/3.0e-91/ankyrin repeat-containing protein At5g02620; K15503 serine/threonine-protein phosphatase 6 regulatory ankyrin repeat subunit B	At3g18670/1.1e-59/[R] KOG0504 FOG: Ankyrin repeat	PTHR24177/8.1E-141/--	NA
CL10631.Contig2_All	4900	5.64	6.76	5.93	2.44	2.47	2.52	506.357	216.713	-1.22437	1.08463e-29	Down	KDO68944.1/8.2e-202/hypothetical protein CISIN_1g002758mg [Citrus sinensis]	XM_006486249.2/0.0/PREDICTED: Citrus sinensis uncharacterized LOC102628359 (LOC102628359), mRNA	sp|Q9LML2|SMXL6_ARATH/5.9e-120/Protein SMAX1-LIKE 6 OS=Arabidopsis thaliana GN=SMXL6 PE=1 SV=1	pxb:103958612/1.4e-158/protein SMAX1-LIKE 7-like; K03695 ATP-dependent Clp protease ATP-binding subunit ClpB	At2g40130/6.2e-120/[O] KOG1051 Chaperone HSP104 and related ATP-dependent Clp proteases	PF07724/6.9E-10/AAA domain (Cdc48 subfamily)	biological_process:GO:0019538//protein metabolic process;molecular_function:GO:0005524//ATP binding;
CL10631.Contig6_All	1365	0.9	0.8	1.07	1.82	2.74	1.86	20.3874	49.2383	1.2721	0.00097279	Up	NA	KU365322.1/0.0/Castanea mollissima cultivar Shi Feng caffeic acid 3-O-methyltransferase (COMT) mRNA, complete cds	NA	NA	NA	NA	NA
CL10632.Contig2_All	1019	0.55	0.87	0.8	1.5	1.69	1.66	11.9175	26.8471	1.17168	0.0170071	Up	NA	XM_004288116.2/0.0/PREDICTED: Fragaria vesca subsp. vesca histone H3.3 (LOC101310256), mRNA	NA	NA	NA	NA	NA
CL10632.Contig3_All	1258	0.76	0.28	0.56	1.53	1.42	1.35	10.812	29.7482	1.46017	0.0048331	Up	NA	XM_004288116.2/0.0/PREDICTED: Fragaria vesca subsp. vesca histone H3.3 (LOC101310256), mRNA	NA	NA	NA	NA	NA
CL10632.Contig4_All	1836	0.54	0.67	0.39	1.42	1.08	1.14	16.4599	37.937	1.20465	0.00474278	Up	NA	XM_004288116.2/0.0/PREDICTED: Fragaria vesca subsp. vesca histone H3.3 (LOC101310256), mRNA	NA	pvu:PHAVU_003G239000g/7.9e-06/hypothetical protein; K04508 transducin (beta)-like 1	NA	NA	NA
CL10633.Contig1_All	738	7.1	6.47	7.2	3.59	2.42	1.83	78.3345	31.7971	-1.30075	3.06781e-05	Down	EPS59423.1/3.2e-25/hypothetical protein M569_15389, partial [Genlisea aurea]	NA	sp|P60114|ATP9_SOLTU/3.9e-20/ATP synthase subunit 9, mitochondrial OS=Solanum tuberosum GN=ATP9 PE=2 SV=1	jcu:105650492/1.1e-19/uncharacterized protein LOC105650492; K02128 F-type H+-transporting ATPase subunit c	7302028/2.9e-21/[C] KOG3025 Mitochondrial F1F0-ATP synthase, subunit c/ATP9/proteolipid	NA	biological_process:GO:0015986//ATP synthesis coupled proton transport;GO:0015991//ATP hydrolysis coupled proton transport;cellular_component:GO:0045263//proton-transporting ATP synthase complex, coupling factor F(o);GO:0016021//integral component of membrane;GO:0031966//mitochondrial membrane;molecular_function:GO:0008289//lipid binding;GO:0015078//hydrogen ion transmembrane transporter activity;
CL10633.Contig3_All	718	0	0.93	0.6	3.65	2.63	3.81	6.06193	37.707	2.63698	7.61104e-06	Up	EPS59423.1/3.1e-25/hypothetical protein M569_15389, partial [Genlisea aurea]	NA	sp|P60114|ATP9_SOLTU/3.8e-20/ATP synthase subunit 9, mitochondrial OS=Solanum tuberosum GN=ATP9 PE=2 SV=1	jcu:105650492/1.1e-19/uncharacterized protein LOC105650492; K02128 F-type H+-transporting ATPase subunit c	Hs4885083/2.8e-21/[C] KOG3025 Mitochondrial F1F0-ATP synthase, subunit c/ATP9/proteolipid	NA	biological_process:GO:0015986//ATP synthesis coupled proton transport;GO:0015991//ATP hydrolysis coupled proton transport;cellular_component:GO:0045263//proton-transporting ATP synthase complex, coupling factor F(o);GO:0016021//integral component of membrane;GO:0031966//mitochondrial membrane;molecular_function:GO:0008289//lipid binding;GO:0016787//hydrolase activity;GO:0015078//hydrogen ion tran…
CL10638.Contig2_All	1639	73.76	78.62	76.8	155.94	157.61	157.39	2053.33	4452.32	1.11659	1.74424e-235	Up	OMO80725.1/1.5e-104/hypothetical protein CCACVL1_12796 [Corchorus capsularis]	XM_006446407.1/0.0/Citrus clementina hypothetical protein (CICLE_v10017539mg) mRNA, complete cds	sp|Q02283|HAT5_ARATH/2.2e-79/Homeobox-leucine zipper protein HAT5 OS=Arabidopsis thaliana GN=HAT5 PE=1 SV=1	tcc:18600741/1.2e-101/homeobox-leucine zipper protein HAT5; K09338 homeobox-leucine zipper protein	At3g01470/5.1e-79/[K] KOG0483 Transcription factor HEX, contains HOX and HALZ domains	PTHR24326:SF136/4.8E-75/--	cellular_component:GO:0005634//nucleus;molecular_function:GO:0043565//sequence-specific DNA binding;GO:0003700//DNA binding transcription factor activity;
CL10638.Contig3_All	1621	31.9	29.46	30.84	84.31	82.08	80.38	816.59	2305.47	1.49737	1.79561e-192	Up	OMO80725.1/1.5e-104/hypothetical protein CCACVL1_12796 [Corchorus capsularis]	XM_006446407.1/0.0/Citrus clementina hypothetical protein (CICLE_v10017539mg) mRNA, complete cds	sp|Q02283|HAT5_ARATH/2.2e-79/Homeobox-leucine zipper protein HAT5 OS=Arabidopsis thaliana GN=HAT5 PE=1 SV=1	tcc:18600741/1.2e-101/homeobox-leucine zipper protein HAT5; K09338 homeobox-leucine zipper protein	At3g01470/5.1e-79/[K] KOG0483 Transcription factor HEX, contains HOX and HALZ domains	PTHR24326:SF136/4.8E-75/--	cellular_component:GO:0005634//nucleus;molecular_function:GO:0043565//sequence-specific DNA binding;GO:0003700//DNA binding transcription factor activity;
CL10639.Contig2_All	3357	1.16	1.24	1.16	3.22	2.89	4.44	67.5719	208.359	1.62458	4.10773e-14	Up	XP_006439033.1/2.7e-111/hypothetical protein CICLE_v10033813mg, partial [Citrus clementina] >ESR52273.1 hypothetical protein CICLE_v10033813mg, partial [Citrus clementina]	XM_021830919.1/0.0/PREDICTED: Hevea brasiliensis zeaxanthin epoxidase, chloroplastic-like (LOC110669315), transcript variant X3, mRNA	sp|P93236|ABA2_SOLLC/1.0e-38/Zeaxanthin epoxidase, chloroplastic OS=Solanum lycopersicum PE=2 SV=1	hbr:110669315/9.6e-58/zeaxanthin epoxidase, chloroplastic-like isoform X1; K09838 zeaxanthin epoxidase [EC:1.14.15.21]	At2g44430/1.3e-73/[R] LSE0287 A BROMO domain	PF00439/7.8E-14/Bromodomain	molecular_function:GO:0003677//DNA binding;
CL1064.Contig1_All	3707	5.57	6.66	6.87	14.33	10.54	12.3	397.844	815.984	1.03634	3.93193e-17	Up	XP_006432663.1/0.0e+00/hypothetical protein CICLE_v10000243mg [Citrus clementina] >XP_006432664.1 hypothetical protein CICLE_v10000243mg [Citrus clementina] >XP_006432666.1 hypothetical protein CICLE_v10000243mg [Citrus clementina] >XP_006471469.1 PREDICTED: extra-large guanine nucleotide-binding protein 3 [Citrus sinensis] >XP_006471470.1 PREDICTED: extra-large guanine nucleotide-binding protein…	XM_006471409.2/0.0/PREDICTED: Citrus sinensis extra-large guanine nucleotide-binding protein 3 (LOC102617931), transcript variant X5, mRNA	sp|Q9C516|XLG3_ARATH/0.0e+00/Extra-large guanine nucleotide-binding protein 3 OS=Arabidopsis thaliana GN=XLG3 PE=1 SV=1	dosa:Os10t0117800-01/4.0e-150/Os10g0117800; Guanine nucleotide binding protein (G-protein), alpha subunit family protein.; K04630 guanine nucleotide-binding protein G(i) subunit alpha	At1g31930/0.0e+00/[DT] KOG0082 G-protein alpha subunit (small G protein superfamily)	PR00318/3.3E-11/Alpha G protein (transducin) signature	biological_process:GO:0007186//G-protein coupled receptor signaling pathway;molecular_function:GO:0031683//G-protein beta/gamma-subunit complex binding;GO:0004871//signal transducer activity;GO:0005525//GTP binding;GO:0003924//GTPase activity;
CL10641.Contig2_All	1821	5.83	5.59	5.71	15.9	15.75	17.27	171.481	516.088	1.58957	5.82658e-52	Up	XP_005709142.1/5.1e-149/S-adenosylmethionine synthetase [Galdieria sulphuraria] >EME32622.1 S-adenosylmethionine synthetase [Galdieria sulphuraria]	KF383289.1/0.0/Eutreptiella gymnastica methionine adenosyltransferase (MATX) mRNA, partial cds	sp|A8HYU5|METK_CHLRE/1.1e-135/S-adenosylmethionine synthase OS=Chlamydomonas reinhardtii GN=METM PE=3 SV=1	gsl:Gasu_03900/7.5e-150/S-adenosylmethionine synthetase; K00789 S-adenosylmethionine synthetase [EC:2.5.1.6]	SPBC14F5.05c/1.5e-180/[H] KOG1506 S-adenosylmethionine synthetase	PS00376/-/S-adenosylmethionine synthase signature 1.	biological_process:GO:0006730//one-carbon metabolic process;GO:0006556//S-adenosylmethionine biosynthetic process;molecular_function:GO:0046872//metal ion binding;GO:0005524//ATP binding;GO:0004478//methionine adenosyltransferase activity;
CL10642.Contig3_All	1975	0.82	0.67	0.86	7.58	7.72	7.39	25.4299	259.361	3.35036	1.50213e-58	Up	BAT86037.1/1.8e-06/hypothetical protein VIGAN_04365000 [Vigna angularis var. angularis]	NA	NA	NA	NA	NA	NA
CL10642.Contig4_All	1277	1.79	1.87	1.87	12.62	13.1	12.81	38.2251	278.511	2.86514	7.60285e-58	Up	NA	NA	NA	NA	NA	NA	NA
CL10645.Contig6_All	4628	2.67	2.78	2.46	0.49	1.44	1.15	204.654	85.7113	-1.25563	0.000101916	Down	XP_006478896.1/0.0e+00/PREDICTED: importin beta-like SAD2 isoform X2 [Citrus sinensis]	XM_006478833.2/0.0/PREDICTED: Citrus sinensis importin beta-like SAD2 (LOC102631369), transcript variant X2, mRNA	sp|F4IRR2|SAD2_ARATH/0.0e+00/Importin beta-like SAD2 OS=Arabidopsis thaliana GN=SAD2 PE=1 SV=1	cit:102631369/0.0e+00/importin beta-like SAD2; K20223 importin-7	At2g31660/0.0e+00/[YU] KOG1991 Nuclear transport receptor RANBP7/RANBP8 (importin beta superfamily)	PTHR10997/0.0/--	NA
CL10647.Contig3_All	698	4.6	3.98	4.22	0.78	0.91	0.85	44.7844	9.62768	-2.21773	6.93191e-08	Down	OQS00817.1/8.2e-39/60S ribosomal protein L32-1 [Thraustotheca clavata]	NA	sp|P49211|RL321_ARATH/6.3e-36/60S ribosomal protein L32-1 OS=Arabidopsis thaliana GN=RPL32A PE=2 SV=2	cme:CYME_CMJ289C/7.9e-39/60S ribosomal protein L32; K02912 large subunit ribosomal protein L32e	SPAC3H5.10/4.7e-42/[J] KOG0878 60S ribosomal protein L32	PTHR23413/9.2E-84/--	biological_process:GO:0006412//translation;cellular_component:GO:0005840//ribosome;molecular_function:GO:0003735//structural constituent of ribosome;
CL10647.Contig4_All	693	1.96	1.56	0.34	0.2	0.2	0.29	12.4147	3.09164	-2.0056	0.0241848	Down	OQS00817.1/3.3e-40/60S ribosomal protein L32-1 [Thraustotheca clavata]	NA	sp|P49211|RL321_ARATH/3.7e-36/60S ribosomal protein L32-1 OS=Arabidopsis thaliana GN=RPL32A PE=2 SV=2	cme:CYME_CMJ289C/3.9e-38/60S ribosomal protein L32; K02912 large subunit ribosomal protein L32e	SPAC3H5.10/1.2e-45/[J] KOG0878 60S ribosomal protein L32	NA	biological_process:GO:0006412//translation;cellular_component:GO:0005840//ribosome;molecular_function:GO:0003735//structural constituent of ribosome;
CL10647.Contig6_All	682	2.76	2.35	2.42	0.26	0	0.73	24.5732	4.17519	-2.55717	0.000160079	Down	OQS00817.1/8.0e-39/60S ribosomal protein L32-1 [Thraustotheca clavata]	NA	sp|P49211|RL321_ARATH/6.2e-36/60S ribosomal protein L32-1 OS=Arabidopsis thaliana GN=RPL32A PE=2 SV=2	cme:CYME_CMJ289C/7.7e-39/60S ribosomal protein L32; K02912 large subunit ribosomal protein L32e	SPAC3H5.10/4.6e-42/[J] KOG0878 60S ribosomal protein L32	PF01655/1.3E-50/Ribosomal protein L32	biological_process:GO:0006412//translation;cellular_component:GO:0005840//ribosome;molecular_function:GO:0003735//structural constituent of ribosome;
CL10647.Contig7_All	634	2.29	5.84	3.54	1.04	0.61	1.49	35.798	11.1668	-1.68066	0.00270105	Down	OQS00817.1/3.0e-40/60S ribosomal protein L32-1 [Thraustotheca clavata]	NA	sp|P49211|RL321_ARATH/3.4e-36/60S ribosomal protein L32-1 OS=Arabidopsis thaliana GN=RPL32A PE=2 SV=2	cme:CYME_CMJ289C/3.5e-38/60S ribosomal protein L32; K02912 large subunit ribosomal protein L32e	SPAC3H5.10/1.1e-45/[J] KOG0878 60S ribosomal protein L32	PF01655/9.0E-51/Ribosomal protein L32	biological_process:GO:0006412//translation;cellular_component:GO:0005840//ribosome;molecular_function:GO:0003735//structural constituent of ribosome;
CL10647.Contig8_All	694	5.18	5.28	3.87	1.05	1.4	0.45	49.763	11.1097	-2.16325	6.18142e-07	Down	OQS00817.1/8.1e-39/60S ribosomal protein L32-1 [Thraustotheca clavata]	NA	sp|P49211|RL321_ARATH/6.3e-36/60S ribosomal protein L32-1 OS=Arabidopsis thaliana GN=RPL32A PE=2 SV=2	cme:CYME_CMJ289C/7.8e-39/60S ribosomal protein L32; K02912 large subunit ribosomal protein L32e	SPAC3H5.10/4.7e-42/[J] KOG0878 60S ribosomal protein L32	PTHR23413/9.2E-84/--	biological_process:GO:0006412//translation;cellular_component:GO:0005840//ribosome;molecular_function:GO:0003735//structural constituent of ribosome;
CL10651.Contig3_All	1411	2.85	3.17	3.01	0.88	1.37	1.4	68.3605	29.5885	-1.20813	0.000105044	Down	XP_006447771.1/6.7e-157/hypothetical protein CICLE_v10014185mg [Citrus clementina] >ESR61011.1 hypothetical protein CICLE_v10014185mg [Citrus clementina]	NA	sp|Q9C9H7|RLP12_ARATH/2.1e-70/Receptor-like protein 12 OS=Arabidopsis thaliana GN=RLP12 PE=2 SV=2	cit:107175230/1.5e-92/receptor-like protein 12; K19613 leucine-rich repeat protein SHOC2	At1g45616/2.9e-86/[R] KOG0619 FOG: Leucine rich repeat	PF00560/0.36/Leucine Rich Repeat	cellular_component:GO:0016021//integral component of membrane;
CL10656.Contig2_All	1180	7.31	7.89	7.47	14.39	14.43	15.07	143.341	292.243	1.02772	4.52697e-16	Up	XP_002304634.2/1.1e-30/hypothetical protein POPTR_0003s15960g, partial [Populus trichocarpa] >EEE79613.2 hypothetical protein POPTR_0003s15960g, partial [Populus trichocarpa]	NA	sp|Q9M2F1|RS272_ARATH/3.6e-31/40S ribosomal protein S27-2 OS=Arabidopsis thaliana GN=RPS27B PE=2 SV=2	bdi:100839931/4.6e-31/40S ribosomal protein S27; K02978 small subunit ribosomal protein S27e	SPBC1685.10/1.6e-34/[J] KOG1779 40s ribosomal protein S27	NA	biological_process:GO:0000028//ribosomal small subunit assembly;GO:0006412//translation;cellular_component:GO:0005840//ribosome;GO:0022627//cytosolic small ribosomal subunit;molecular_function:GO:0046872//metal ion binding;GO:0003735//structural constituent of ribosome;
CL10657.Contig1_All	1988	0.85	0.77	0.92	4.87	4.63	5.04	28.2508	167.031	2.56375	5.03709e-31	Up	XP_015873989.1/8.2e-84/PREDICTED: L-type lectin-domain containing receptor kinase IV.2-like [Ziziphus jujuba]	XM_006488606.2/0.0/PREDICTED: Citrus sinensis L-type lectin-domain containing receptor kinase IV.1-like (LOC102616144), mRNA	sp|Q9ZW09|LRK31_ARATH/1.0e-70/Probable inactive L-type lectin-domain containing receptor kinase III.1 OS=Arabidopsis thaliana GN=LECRK31 PE=3 SV=1	hbr:110636991/2.8e-81/L-type lectin-domain containing receptor kinase IV.2-like; K04733 interleukin-1 receptor-associated kinase 4 [EC:2.7.11.1]	At2g29220/2.4e-70/[T] LSE0015 A Receptor-like protein kinase, contains lectin domains	PTHR27007/3.1E-132/--	cellular_component:GO:0016021//integral component of membrane;molecular_function:GO:0030246//carbohydrate binding;GO:0005524//ATP binding;GO:0004672//protein kinase activity;
CL10657.Contig3_All	3557	1.49	1.58	2.01	7.08	6.39	6.49	101.619	419.485	2.04544	1.41798e-49	Up	XP_017984551.1/1.1e-142/PREDICTED: G-type lectin S-receptor-like serine/threonine-protein kinase CES101 [Theobroma cacao]	XM_015758315.1/0.0/PREDICTED: Oryza sativa Japonica Group G-type lectin S-receptor-like serine/threonine-protein kinase At1g11330 (LOC107278529), mRNA	sp|Q9ZR08|Y4230_ARATH/1.0e-105/G-type lectin S-receptor-like serine/threonine-protein kinase At4g03230 OS=Arabidopsis thaliana GN=At4g03230 PE=3 SV=3	hbr:110636985/1.4e-120/L-type lectin-domain containing receptor kinase I.8-like; K04733 interleukin-1 receptor-associated kinase 4 [EC:2.7.11.1]	At4g03230/2.4e-105/[T] LSE0015 A Receptor-like protein kinase, contains lectin domains	PS00108/-/Serine/Threonine protein kinases active-site signature.	NA
CL10659.Contig10_All	1004	1.6	1.51	3.03	0.56	0.4	0.44	31.5477	8.05976	-1.96873	0.000255747	Down	XP_006445220.1/7.7e-115/hypothetical protein CICLE_v10023337mg, partial [Citrus clementina] >ESR58460.1 hypothetical protein CICLE_v10023337mg, partial [Citrus clementina]	XM_020372275.1/0.0/PREDICTED: Cajanus cajan cytochrome P450 704C1-like (LOC109809056), mRNA	sp|Q50EK3|C04C1_PINTA/9.6e-62/Cytochrome P450 704C1 OS=Pinus taeda GN=CYP704C1 PE=2 SV=1	cann:107878194/4.1e-49/cytochrome P450 704B1; K20495 long-chain fatty acid omega-monooxygenase [EC:1.14.13.205]	At2g45510/1.5e-84/[QI] KOG0157 Cytochrome P450 CYP4/CYP19/CYP26 subfamilies	PTHR24296/7.7E-158/--	cellular_component:GO:0016021//integral component of membrane;molecular_function:GO:0016705//oxidoreductase activity, acting on paired donors, with incorporation or reduction of molecular oxygen;GO:0020037//heme binding;GO:0005506//iron ion binding;GO:0004497//monooxygenase activity;
CL10659.Contig2_All	2084	3.72	3.55	3.51	0.59	0.59	0.57	122.875	21.4248	-2.51984	1.32748e-22	Down	XP_006445220.1/1.3e-127/hypothetical protein CICLE_v10023337mg, partial [Citrus clementina] >ESR58460.1 hypothetical protein CICLE_v10023337mg, partial [Citrus clementina]	XM_007220887.2/0.0/PREDICTED: Prunus persica cytochrome P450 704C1 (LOC18785596), mRNA	sp|Q50EK3|C04C1_PINTA/1.8e-86/Cytochrome P450 704C1 OS=Pinus taeda GN=CYP704C1 PE=2 SV=1	ppp:PHYPADRAFT_183927/5.2e-70/hypothetical protein; K20495 long-chain fatty acid omega-monooxygenase [EC:1.14.13.205]	At2g45510/2.6e-112/[QI] KOG0157 Cytochrome P450 CYP4/CYP19/CYP26 subfamilies	PS00086/-/Cytochrome P450 cysteine heme-iron ligand signature.	cellular_component:GO:0016021//integral component of membrane;molecular_function:GO:0016705//oxidoreductase activity, acting on paired donors, with incorporation or reduction of molecular oxygen;GO:0020037//heme binding;GO:0005506//iron ion binding;GO:0004497//monooxygenase activity;
CL10659.Contig4_All	2592	0.94	0.76	0.89	0.16	0.61	0.26	36.3947	16.0038	-1.18532	0.0319595	Down	XP_006445220.1/2.2e-230/hypothetical protein CICLE_v10023337mg, partial [Citrus clementina] >ESR58460.1 hypothetical protein CICLE_v10023337mg, partial [Citrus clementina]	XM_011036414.1/0.0/PREDICTED: Populus euphratica cytochrome P450 704C1 (LOC105132735), transcript variant X2, mRNA	sp|Q50EK3|C04C1_PINTA/3.2e-141/Cytochrome P450 704C1 OS=Pinus taeda GN=CYP704C1 PE=2 SV=1	fve:101301291/3.0e-107/cytochrome P450 704B1; K20495 long-chain fatty acid omega-monooxygenase [EC:1.14.13.205]	At2g45510/1.1e-187/[QI] KOG0157 Cytochrome P450 CYP4/CYP19/CYP26 subfamilies	PTHR24296/7.3E-305/--	cellular_component:GO:0016021//integral component of membrane;molecular_function:GO:0016705//oxidoreductase activity, acting on paired donors, with incorporation or reduction of molecular oxygen;GO:0020037//heme binding;GO:0005506//iron ion binding;GO:0004497//monooxygenase activity;
CL10659.Contig7_All	2502	15.12	16.47	15.26	3.78	3.92	4.44	650.638	178.5	-1.86593	3.86504e-76	Down	XP_021825650.1/2.6e-127/cytochrome P450 704C1-like isoform X2 [Prunus avium]	XM_011036414.1/0.0/PREDICTED: Populus euphratica cytochrome P450 704C1 (LOC105132735), transcript variant X2, mRNA	sp|Q50EK3|C04C1_PINTA/2.2e-86/Cytochrome P450 704C1 OS=Pinus taeda GN=CYP704C1 PE=2 SV=1	ppp:PHYPADRAFT_183927/6.2e-70/hypothetical protein; K20495 long-chain fatty acid omega-monooxygenase [EC:1.14.13.205]	At2g45510/3.1e-112/[QI] KOG0157 Cytochrome P450 CYP4/CYP19/CYP26 subfamilies	PR00385/8.3E-13/P450 superfamily signature	cellular_component:GO:0016021//integral component of membrane;molecular_function:GO:0016705//oxidoreductase activity, acting on paired donors, with incorporation or reduction of molecular oxygen;GO:0020037//heme binding;GO:0005506//iron ion binding;GO:0004497//monooxygenase activity;
CL10663.Contig12_All	5260	0.96	1.02	0.83	0.43	0.29	0.56	82.1248	40.0796	-1.03495	0.0012792	Down	AKE49463.1/6.6e-133/NBS-LRR disease resistance protein NBS48 [Dimocarpus longan]	KP266529.1/0.0/Dimocarpus longan NBS-LRR disease resistance protein NBS48 mRNA, complete cds	sp|Q9LRR4|R13L1_ARATH/1.3e-29/Putative disease resistance RPP13-like protein 1 OS=Arabidopsis thaliana GN=RPPL1 PE=3 SV=1	cit:107177104/4.7e-59/putative disease resistance protein At3g14460; K22038 volume-regulated anion channel	At3g25510/4.3e-18/[VT] LSE0039 A Disease resistance protein (TIR-NBS-LRR class)	PTHR23155/9.2E-26/--	biological_process:GO:0006952//defense response;molecular_function:GO:0043531//ADP binding;
CL10665.Contig10_All	1530	3.73	3.71	4.55	1.78	1.58	1.85	98.7077	45.3806	-1.12109	4.67489e-06	Down	KDO51068.1/8.6e-174/hypothetical protein CISIN_1g045570mg [Citrus sinensis]	XM_006480553.2/0.0/PREDICTED: Citrus sinensis UDP-glycosyltransferase 71K1-like (LOC102631377), mRNA	sp|D3UAG2|U71K2_PYRCO/1.3e-139/UDP-glycosyltransferase 71K2 OS=Pyrus communis GN=UGT71K2 PE=1 SV=1	ccaj:109818957/5.3e-88/UDP-glycosyltransferase 71K1 isoform X1; K03809 NAD(P)H dehydrogenase (quinone) [EC:1.6.5.2]	At1g07260/3.9e-129/[GC] KOG1192 UDP-glucuronosyl and UDP-glucosyl transferase	PTHR11926:SF374/6.0E-235/--	biological_process:GO:0008152//metabolic process;molecular_function:GO:0016758//transferase activity, transferring hexosyl groups;
CL10665.Contig15_All	1868	4.34	4.12	3.81	1.17	1.58	1.73	125.219	48.7713	-1.36035	2.4349e-09	Down	KDO51068.1/6.2e-110/hypothetical protein CISIN_1g045570mg [Citrus sinensis]	XM_006480553.2/0.0/PREDICTED: Citrus sinensis UDP-glycosyltransferase 71K1-like (LOC102631377), mRNA	sp|D3UAG0|U71K1_MALDO/5.2e-93/UDP-glycosyltransferase 71K1 OS=Malus domestica GN=UGT71K1 PE=1 SV=1	ccaj:109818957/1.4e-87/UDP-glycosyltransferase 71K1 isoform X1; K03809 NAD(P)H dehydrogenase (quinone) [EC:1.6.5.2]	At1g07260/4.5e-87/[GC] KOG1192 UDP-glucuronosyl and UDP-glucosyl transferase	PTHR11926/4.5E-159/--	biological_process:GO:0008152//metabolic process;molecular_function:GO:0016758//transferase activity, transferring hexosyl groups;
CL1067.Contig1_All	1771	10.65	7.53	11.91	20.88	21.49	23.23	292.588	671.672	1.19889	1.97478e-16	Up	XP_006435475.1/3.5e-94/hypothetical protein CICLE_v10002005mg [Citrus clementina] >XP_006435476.1 hypothetical protein CICLE_v10002005mg [Citrus clementina] >ESR48715.1 hypothetical protein CICLE_v10002005mg [Citrus clementina] >ESR48716.1 hypothetical protein CICLE_v10002005mg [Citrus clementina]	XM_006473806.2/0.0/PREDICTED: Citrus sinensis bZIP transcription factor 60 (LOC102612558), mRNA	sp|Q9C7S0|BZP60_ARATH/1.1e-47/bZIP transcription factor 60 OS=Arabidopsis thaliana GN=BZIP60 PE=1 SV=1	egr:104450356/2.2e-61/bZIP transcription factor 60; K21548 ATF/CREB family transcription factor	CE11300/2.1e-06/[K] KOG0709 CREB/ATF family transcription factor	PTHR22952/1.0E-51/--	cellular_component:GO:0016021//integral component of membrane;molecular_function:GO:0003677//DNA binding;GO:0003700//DNA binding transcription factor activity;
CL1067.Contig2_All	1771	3.42	3.48	2.68	9.65	7.95	5.86	93.3737	239.158	1.35688	6.22461e-10	Up	XP_006435475.1/3.5e-94/hypothetical protein CICLE_v10002005mg [Citrus clementina] >XP_006435476.1 hypothetical protein CICLE_v10002005mg [Citrus clementina] >ESR48715.1 hypothetical protein CICLE_v10002005mg [Citrus clementina] >ESR48716.1 hypothetical protein CICLE_v10002005mg [Citrus clementina]	XM_006473806.2/0.0/PREDICTED: Citrus sinensis bZIP transcription factor 60 (LOC102612558), mRNA	sp|Q9C7S0|BZP60_ARATH/1.1e-47/bZIP transcription factor 60 OS=Arabidopsis thaliana GN=BZIP60 PE=1 SV=1	egr:104450356/2.2e-61/bZIP transcription factor 60; K21548 ATF/CREB family transcription factor	CE11300/2.1e-06/[K] KOG0709 CREB/ATF family transcription factor	PTHR22952/1.0E-51/--	cellular_component:GO:0016021//integral component of membrane;molecular_function:GO:0003677//DNA binding;GO:0003700//DNA binding transcription factor activity;
CL1067.Contig3_All	1841	30.64	32.14	32.89	63.61	68.18	65.12	968.088	2102.45	1.11886	2.43844e-106	Up	XP_006435475.1/3.6e-94/hypothetical protein CICLE_v10002005mg [Citrus clementina] >XP_006435476.1 hypothetical protein CICLE_v10002005mg [Citrus clementina] >ESR48715.1 hypothetical protein CICLE_v10002005mg [Citrus clementina] >ESR48716.1 hypothetical protein CICLE_v10002005mg [Citrus clementina]	XM_006473806.2/0.0/PREDICTED: Citrus sinensis bZIP transcription factor 60 (LOC102612558), mRNA	sp|Q9C7S0|BZP60_ARATH/1.1e-47/bZIP transcription factor 60 OS=Arabidopsis thaliana GN=BZIP60 PE=1 SV=1	egr:104450356/2.3e-61/bZIP transcription factor 60; K21548 ATF/CREB family transcription factor	CE11300/2.2e-06/[K] KOG0709 CREB/ATF family transcription factor	PTHR22952/1.0E-51/--	cellular_component:GO:0016021//integral component of membrane;molecular_function:GO:0003677//DNA binding;GO:0003700//DNA binding transcription factor activity;
CL1067.Contig4_All	1759	5.12	5.19	5.77	10.45	10.81	10.28	154.977	320.508	1.04831	1.17125e-17	Up	XP_006435475.1/2.7e-86/hypothetical protein CICLE_v10002005mg [Citrus clementina] >XP_006435476.1 hypothetical protein CICLE_v10002005mg [Citrus clementina] >ESR48715.1 hypothetical protein CICLE_v10002005mg [Citrus clementina] >ESR48716.1 hypothetical protein CICLE_v10002005mg [Citrus clementina]	XM_006473806.2/0.0/PREDICTED: Citrus sinensis bZIP transcription factor 60 (LOC102612558), mRNA	sp|Q9C7S0|BZP60_ARATH/4.9e-45/bZIP transcription factor 60 OS=Arabidopsis thaliana GN=BZIP60 PE=1 SV=1	egr:104450356/4.1e-60/bZIP transcription factor 60; K21548 ATF/CREB family transcription factor	NA	PTHR22952/1.2E-51/--	cellular_component:GO:0016021//integral component of membrane;molecular_function:GO:0003677//DNA binding;GO:0003700//DNA binding transcription factor activity;
CL10671.Contig5_All	3366	3.59	3.3	3.45	1.07	0.82	1.1	194.054	59.3107	-1.71009	2.68432e-20	Down	BAJ98567.1/0.0e+00/predicted protein [Hordeum vulgare subsp. vulgare]	AK119312.1/0.0/Oryza sativa Japonica Group cDNA clone:001-130-G09, full insert sequence	sp|Q8H0V6|AB3F_ARATH/3.2e-40/ABC transporter F family member 3 OS=Arabidopsis thaliana GN=ABCF3 PE=1 SV=1	csl:COCSUDRAFT_47721/8.5e-248/elongation factor EF-3; K03235 elongation factor 3	YNL014w_2/1.7e-262/[EJ] KOG0062 ATPase component of ABC transporters with duplicated ATPase domains/Translation elongation factor EF-3b	PTHR19211:SF5/0.0/--	NA
CL10671.Contig6_All	3564	2.63	3.63	3.38	9.07	7.74	9.17	193.213	547.607	1.50295	6.15455e-31	Up	BAJ98567.1/0.0e+00/predicted protein [Hordeum vulgare subsp. vulgare]	AK119312.1/0.0/Oryza sativa Japonica Group cDNA clone:001-130-G09, full insert sequence	sp|Q8H0V6|AB3F_ARATH/3.5e-37/ABC transporter F family member 3 OS=Arabidopsis thaliana GN=ABCF3 PE=1 SV=1	csl:COCSUDRAFT_47721/1.1e-253/elongation factor EF-3; K03235 elongation factor 3	YNL014w_2/9.9e-261/[EJ] KOG0062 ATPase component of ABC transporters with duplicated ATPase domains/Translation elongation factor EF-3b	PS00211/-/ABC transporters family signature.	molecular_function:GO:0005524//ATP binding;GO:0003746//translation elongation factor activity;GO:0016887//ATPase activity;
CL10672.Contig1_All	1063	0.21	0.26	0.12	0.48	0.89	0.71	3.36348	11.258	1.74293	0.0259137	Up	ETP53641.1/5.6e-47/hypothetical protein F442_01458 [Phytophthora parasitica P10297]	NA	sp|P49315|CATA1_NICPL/1.8e-34/Catalase isozyme 1 (Fragment) OS=Nicotiana plumbaginifolia GN=CAT1 PE=2 SV=1	mus:103994447/7.3e-36/catalase isozyme 2-like; K03781 catalase [EC:1.11.1.6]	YDR256c/1.2e-49/[P] KOG0047 Catalase	PS51402/29.049/catalase family profile.	biological_process:GO:0006979//response to oxidative stress;GO:0042744//hydrogen peroxide catabolic process;GO:0042542//response to hydrogen peroxide;cellular_component:GO:0005777//peroxisome;GO:0005739//mitochondrion;molecular_function:GO:0046872//metal ion binding;GO:0020037//heme binding;GO:0004096//catalase activity;
CL10672.Contig2_All	1696	1.83	1.66	1.8	0.98	0.42	0.92	48.1363	22.9662	-1.06761	0.010519	Down	GAQ92572.1/1.3e-138/catalase [Klebsormidium nitens]	NA	sp|Q01297|CATA1_RICCO/2.1e-93/Catalase isozyme 1 OS=Ricinus communis GN=CAT1 PE=2 SV=2	cmo:103493813/6.1e-93/catalase isozyme 1-like; K03781 catalase [EC:1.11.1.6]	SPCC757.07c/2.1e-144/[P] KOG0047 Catalase	PF06628/4.4E-16/Catalase-related immune-responsive	biological_process:GO:0006979//response to oxidative stress;molecular_function:GO:0046872//metal ion binding;GO:0020037//heme binding;GO:0004096//catalase activity;
CL10676.Contig3_All	3360	0.45	0.84	0.79	1.55	1.35	1.55	39.024	87.5564	1.16585	8.5502e-05	Up	XP_006471198.1/7.1e-205/PREDICTED: TMV resistance protein N-like isoform X1 [Citrus sinensis]	JN398326.1/0.0/Dimocarpus longan cultivar Honghezi NBS-LRR disease resistance protein (NBS2) mRNA, partial cds	sp|Q40392|TMVRN_NICGU/4.3e-138/TMV resistance protein N OS=Nicotiana glutinosa GN=N PE=1 SV=1	ccaj:109818165/1.1e-159/TMV resistance protein N-like; K22038 volume-regulated anion channel	At5g17680/5.0e-145/[VT] LSE0039 A Disease resistance protein (TIR-NBS-LRR class)	PF00931/2.0E-33/NB-ARC domain	NA
CL10677.Contig10_All	2136	0.85	1.01	1	0.38	0.45	0.36	33.0746	14.4601	-1.19365	0.00609238	Down	NA	NA	NA	NA	NA	NA	NA
CL10677.Contig8_All	2991	1.67	1.34	1.63	0.64	0.51	0.77	76.4679	33.6688	-1.18344	7.77172e-05	Down	AKE49464.1/8.1e-144/NBS-LRR disease resistance protein NBS49 [Dimocarpus longan]	NA	sp|Q9FI14|TAO1_ARATH/4.8e-16/Disease resistance protein TAO1 OS=Arabidopsis thaliana GN=TAO1 PE=4 SV=1	cit:107174789/6.5e-82/putative disease resistance protein At3g14460; K19613 leucine-rich repeat protein SHOC2	At5g44510/1.1e-15/[VT] LSE0039 A Disease resistance protein (TIR-NBS-LRR class)	PTHR23155/8.4E-29/--	biological_process:GO:0006952//defense response;molecular_function:GO:0043531//ADP binding;
CL10677.Contig9_All	2796	2.23	1.97	1.52	1.04	0.99	0.62	88.5824	43.5206	-1.02532	0.00104642	Down	AKE49464.1/2.5e-118/NBS-LRR disease resistance protein NBS49 [Dimocarpus longan]	NA	sp|Q9FI14|TAO1_ARATH/6.9e-17/Disease resistance protein TAO1 OS=Arabidopsis thaliana GN=TAO1 PE=4 SV=1	cit:107174789/2.1e-74/putative disease resistance protein At3g14460; K19613 leucine-rich repeat protein SHOC2	At5g44510/1.6e-16/[VT] LSE0039 A Disease resistance protein (TIR-NBS-LRR class)	PTHR23155/2.2E-23/--	biological_process:GO:0006952//defense response;molecular_function:GO:0043531//ADP binding;
CL1068.Contig1_All	957	1.71	1.26	1.48	0.19	0.13	0.56	21.8789	5.32777	-2.03794	0.00124277	Down	BAJ91015.1/5.1e-84/predicted protein [Hordeum vulgare subsp. vulgare]	AK357036.1/0.0/Hordeum vulgare subsp. vulgare mRNA for predicted protein, complete cds, clone: NIASHv1044K23	sp|O22518|RSSA_SOYBN/3.0e-60/40S ribosomal protein SA OS=Glycine max PE=2 SV=1	mcha:111020345/4.8e-63/40S ribosomal protein SA-like; K02998 small subunit ribosomal protein SAe	SPBC685.06/1.6e-77/[J] KOG0830 40S ribosomal protein SA (P40)/Laminin receptor 1	NA	biological_process:GO:0000028//ribosomal small subunit assembly;GO:0006407//rRNA export from nucleus;GO:0000461//endonucleolytic cleavage to generate mature 3'-end of SSU-rRNA from (SSU-rRNA, 5.8S rRNA, LSU-rRNA);GO:0006412//translation;GO:0000447//endonucleolytic cleavage in ITS1 to separate SSU-rRNA from 5.8S rRNA and LSU-rRNA from tricistronic rRNA transcript (SSU-rRNA, 5.8S rRNA, LSU-rRNA);ce…
CL1068.Contig2_All	1099	0.8	2.23	1.07	0.22	0.39	0.16	22.6307	5.12557	-2.14249	0.00158539	Down	BAJ91015.1/8.8e-96/predicted protein [Hordeum vulgare subsp. vulgare]	AK110673.1/0.0/Oryza sativa Japonica Group cDNA clone:002-169-G05, full insert sequence	sp|O22518|RSSA_SOYBN/3.4e-68/40S ribosomal protein SA OS=Glycine max PE=2 SV=1	bdi:100832279/5.0e-72/40S ribosomal protein SA-like; K02998 small subunit ribosomal protein SAe	SPBC685.06/6.4e-86/[J] KOG0830 40S ribosomal protein SA (P40)/Laminin receptor 1	NA	biological_process:GO:0000028//ribosomal small subunit assembly;GO:0006407//rRNA export from nucleus;GO:0000461//endonucleolytic cleavage to generate mature 3'-end of SSU-rRNA from (SSU-rRNA, 5.8S rRNA, LSU-rRNA);GO:0006412//translation;GO:0000447//endonucleolytic cleavage in ITS1 to separate SSU-rRNA from 5.8S rRNA and LSU-rRNA from tricistronic rRNA transcript (SSU-rRNA, 5.8S rRNA, LSU-rRNA);ce…
CL1068.Contig3_All	1067	1.38	1.29	2.16	0.12	0.1	0.11	26.3044	2.41602	-3.4446	2.63595e-07	Down	BAJ91015.1/8.5e-96/predicted protein [Hordeum vulgare subsp. vulgare]	AK110673.1/0.0/Oryza sativa Japonica Group cDNA clone:002-169-G05, full insert sequence	sp|O22518|RSSA_SOYBN/3.3e-68/40S ribosomal protein SA OS=Glycine max PE=2 SV=1	bdi:100832279/2.6e-73/40S ribosomal protein SA-like; K02998 small subunit ribosomal protein SAe	SPBC685.06/6.3e-86/[J] KOG0830 40S ribosomal protein SA (P40)/Laminin receptor 1	PF16122/5.1E-8/40S ribosomal protein SA C-terminus	biological_process:GO:0000028//ribosomal small subunit assembly;GO:0006407//rRNA export from nucleus;GO:0000461//endonucleolytic cleavage to generate mature 3'-end of SSU-rRNA from (SSU-rRNA, 5.8S rRNA, LSU-rRNA);GO:0006412//translation;GO:0000447//endonucleolytic cleavage in ITS1 to separate SSU-rRNA from 5.8S rRNA and LSU-rRNA from tricistronic rRNA transcript (SSU-rRNA, 5.8S rRNA, LSU-rRNA);ce…
CL10680.Contig1_All	799	0.77	0.69	1.02	2.82	2.68	1.68	10.7827	30.8093	1.51465	0.00200545	Up	KMZ75128.1/9.0e-66/70 kDa heat shock protein [Zostera marina]	XM_016826082.1/0.0/PREDICTED: Gossypium hirsutum probable mediator of RNA polymerase II transcription subunit 37c (LOC107900472), mRNA	sp|P09189|HSP7C_PETHY/2.1e-67/Heat shock cognate 70 kDa protein OS=Petunia hybrida GN=HSP70 PE=2 SV=1	jcu:105647790/1.7e-66/heat shock cognate 70 kDa protein 2; K03283 heat shock 70kDa protein 1/2/6/8	At3g12580/6.4e-67/[O] KOG0101 Molecular chaperones HSP70/HSC70, HSP70 superfamily	PF00012/1.0E-48/Hsp70 protein	molecular_function:GO:0005524//ATP binding;
CL1072.Contig2_All	661	3	3.68	3.72	1.07	1.41	0.83	33.9355	11.551	-1.55478	0.000554044	Down	NA	NA	NA	NA	NA	NA	NA
CL1072.Contig3_All	2197	4.08	4.11	3.75	1.52	1.8	1.92	144.276	67.1482	-1.10341	2.18177e-08	Down	XP_005714435.1/6.0e-27/unnamed protein product [Chondrus crispus] >CDF34616.1 unnamed protein product [Chondrus crispus]	AK111198.1/0.0/Oryza sativa Japonica Group cDNA clone:002-178-D12, full insert sequence	sp|Q9C6S1|FH14_ARATH/1.9e-06/Formin-like protein 14 OS=Arabidopsis thaliana GN=FH14 PE=3 SV=3	lang:109362713/1.9e-09/protein NBR1 homolog; K17987 next to BRCA1 gene 1 protein	Hs4505285/1.2e-17/[WV] KOG1216 von Willebrand factor and related coagulation proteins	PTHR31297/6.8E-130/--	biological_process:GO:0016539//intein-mediated protein splicing;cellular_component:GO:0016021//integral component of membrane;molecular_function:GO:0004252//serine-type endopeptidase activity;GO:0008233//peptidase activity;
CL1073.Contig11_All	1851	0	0.05	0	1.24	1.35	1.73	1.16151	45.4559	5.29039	1.12179e-12	Up	XP_010263421.1/2.2e-75/PREDICTED: uncharacterized protein LOC104601677 isoform X1 [Nelumbo nucifera]	XM_010265123.2/0.0/PREDICTED: Nelumbo nucifera uncharacterized LOC104601677 (LOC104601677), transcript variant X2, mRNA	NA	nnu:104601677/3.3e-76/uncharacterized LOC104601677; K19476 vacuolar protein sorting-associated protein IST1	At1g13340/4.0e-56/[Z] KOG2027 Spindle pole body protein	PTHR12161/6.0E-13/--	biological_process:GO:0015031//protein transport;
CL1073.Contig2_All	1984	1.49	2.22	2.13	4.78	3.53	2.9	63.5547	128.039	1.01051	0.000308607	Up	KDO58992.1/7.8e-135/hypothetical protein CISIN_1g010606mg [Citrus sinensis]	XM_022032255.1/0.0/PREDICTED: Carica papaya dentin sialophosphoprotein-like (LOC110807208), mRNA	NA	cit:102615153/1.7e-134/uncharacterized LOC102615153; K19476 vacuolar protein sorting-associated protein IST1	At1g13340/5.8e-69/[Z] KOG2027 Spindle pole body protein	PF03398/4.8E-51/Regulator of Vps4 activity in the MVB pathway	NA
CL1073.Contig3_All	1911	1.42	1.33	1.17	0.85	0.49	0.5	40.4914	20.2135	-1.00229	0.0183054	Down	KDO58992.1/3.4e-55/hypothetical protein CISIN_1g010606mg [Citrus sinensis]	XM_010265123.2/0.0/PREDICTED: Nelumbo nucifera uncharacterized LOC104601677 (LOC104601677), transcript variant X2, mRNA	NA	cit:102615153/1.5e-55/uncharacterized LOC102615153; K19476 vacuolar protein sorting-associated protein IST1	At1g13340/1.2e-23/[Z] KOG2027 Spindle pole body protein	PTHR12161:SF23/4.9E-13/--	NA
CL1073.Contig4_All	1971	0.84	0.56	1.67	2.4	2.67	2.65	33.4034	87.1276	1.38313	0.000423432	Up	KDO58992.1/1.9e-125/hypothetical protein CISIN_1g010606mg [Citrus sinensis]	XM_010265123.2/0.0/PREDICTED: Nelumbo nucifera uncharacterized LOC104601677 (LOC104601677), transcript variant X2, mRNA	NA	cit:102615153/4.1e-125/uncharacterized LOC102615153; K19476 vacuolar protein sorting-associated protein IST1	At1g13340/6.4e-60/[Z] KOG2027 Spindle pole body protein	PTHR12161:SF16/7.0E-23/--	NA
CL1073.Contig5_All	1890	2.15	1.76	1.38	3.53	2.71	3.99	55.1059	111.398	1.01545	0.000194674	Up	KDO58992.1/6.5e-131/hypothetical protein CISIN_1g010606mg [Citrus sinensis]	XM_022032255.1/0.0/PREDICTED: Carica papaya dentin sialophosphoprotein-like (LOC110807208), mRNA	NA	cit:102615153/1.4e-130/uncharacterized LOC102615153; K19476 vacuolar protein sorting-associated protein IST1	At1g13340/2.4e-64/[Z] KOG2027 Spindle pole body protein	PF03398/7.5E-26/Regulator of Vps4 activity in the MVB pathway	NA
CL1073.Contig6_All	2060	0.64	0.41	0.39	0.78	1.64	0.85	16.3285	38.34	1.23146	0.0174933	Up	KDO58992.1/5.5e-99/hypothetical protein CISIN_1g010606mg [Citrus sinensis]	XM_010265123.2/0.0/PREDICTED: Nelumbo nucifera uncharacterized LOC104601677 (LOC104601677), transcript variant X2, mRNA	NA	cit:102615153/2.4e-99/uncharacterized LOC102615153; K19476 vacuolar protein sorting-associated protein IST1	At1g13340/1.8e-36/[Z] KOG2027 Spindle pole body protein	PTHR12161:SF16/7.0E-23/--	NA
CL1075.Contig5_All	2086	2.25	2.4	2.82	5.18	5	4.27	86.228	175.114	1.02207	2.64516e-08	Up	XP_020426213.1/3.0e-20/uncharacterized protein LOC109950704 [Prunus persica]	AF124226.2/0.0/Brassica rapa pollen-specific arabinogalacta protein BAN102 gene, complete cds	NA	NA	NA	PTHR32166/6.5E-27/--	NA
CL1078.Contig1_All	1185	41.73	41.83	40.27	128.12	138.4	135.94	787.225	2697.36	1.7767	2.40996e-258	Up	OMP10852.1/4.4e-93/hypothetical protein COLO4_04217 [Corchorus olitorius]	XM_012234337.2/0.0/PREDICTED: Jatropha curcas protein LURP-one-related 15 (LOC105648067), mRNA	sp|Q9LZX1|LOR15_ARATH/2.7e-79/Protein LURP-one-related 15 OS=Arabidopsis thaliana GN=At5g01750 PE=1 SV=1	csat:104781510/1.1e-21/uncharacterized protein LOC104781510 isoform X1; K15285 solute carrier family 35, member E3	NA	PTHR31087/3.8E-110/--	NA
CL1078.Contig4_All	1228	42.53	43.1	43.39	139.66	133.92	138.21	851.848	2866.9	1.75082	0	Up	OMP10852.1/4.6e-93/hypothetical protein COLO4_04217 [Corchorus olitorius]	XM_012234337.2/0.0/PREDICTED: Jatropha curcas protein LURP-one-related 15 (LOC105648067), mRNA	sp|Q9LZX1|LOR15_ARATH/2.8e-79/Protein LURP-one-related 15 OS=Arabidopsis thaliana GN=At5g01750 PE=1 SV=1	csat:104781510/1.2e-21/uncharacterized protein LOC104781510 isoform X1; K15285 solute carrier family 35, member E3	NA	PF04525/1.3E-62/LURP-one-related	NA
CL1079.Contig2_All	555	6.89	8.29	6.7	3.19	2.1	2.76	59.3418	23.2906	-1.3493	5.40795e-05	Down	XP_006417074.1/3.2e-46/hypothetical protein EUTSA_v10008978mg [Eutrema salsugineum] >ESQ35427.1 hypothetical protein EUTSA_v10008978mg [Eutrema salsugineum]	AK110635.1/0.0/Oryza sativa Japonica Group cDNA clone:002-169-C03, full insert sequence	sp|Q9XI91|IF5A1_ARATH/2.6e-48/Eukaryotic translation initiation factor 5A-1 OS=Arabidopsis thaliana GN=ELF5A-1 PE=1 SV=1	aly:ARALYDRAFT_471555/1.6e-47/EIF-5A; eukaryotic translation initiation factor 5A-1; K03263 translation initiation factor 5A	SPAC26H5.10c/7.8e-64/[J] KOG3271 Translation initiation factor 5A (eIF-5A)	PTHR11673/2.8E-107/--	biological_process:GO:0006452//translational frameshifting;GO:0045905//positive regulation of translational termination;GO:0045901//positive regulation of translational elongation;molecular_function:GO:0043022//ribosome binding;GO:0003746//translation elongation factor activity;
CL1084.Contig15_All	733	0	0	0	0	0.69	2.1	1.10804	9.88095	3.15665	0.00306392	Up	NA	NA	NA	NA	NA	NA	NA
CL1086.Contig1_All	672	22.64	25.01	16.71	8.57	7.49	7.16	218.762	83.6589	-1.38677	1.11138e-11	Down	XP_002953225.1/1.8e-14/hypothetical protein VOLCADRAFT_63308 [Volvox carteri f. nagariensis] >EFJ45824.1 hypothetical protein VOLCADRAFT_63308, partial [Volvox carteri f. nagariensis]	AK119968.1/0.0/Oryza sativa Japonica Group cDNA clone:002-184-D12, full insert sequence	sp|Q9FPQ6|GP1_CHLRE/3.8e-14/Vegetative cell wall protein gp1 OS=Chlamydomonas reinhardtii GN=GP1 PE=1 SV=1	spen:107017260/2.8e-09/leucine-rich repeat extensin-like protein 5; K03006 DNA-directed RNA polymerase II subunit RPB1 [EC:2.7.7.6]	At1g31810/6.0e-10/[ZR] LSE0118 A Protein possibly involved in cytoskeleton rearrangements, contains FH domain	NA	NA
CL1086.Contig2_All	681	15.02	15.66	9.81	4.03	5.06	4.5	139.372	50.0102	-1.47865	1.11172e-08	Down	XP_009403862.1/4.7e-15/PREDICTED: peptide-N4-(N-acetyl-beta-glucosaminyl)asparagine amidase A-like [Musa acuminata subsp. malaccensis]	AK119968.1/0.0/Oryza sativa Japonica Group cDNA clone:002-184-D12, full insert sequence	sp|Q9FPQ6|GP1_CHLRE/4.3e-13/Vegetative cell wall protein gp1 OS=Chlamydomonas reinhardtii GN=GP1 PE=1 SV=1	spen:107017260/9.8e-10/leucine-rich repeat extensin-like protein 5; K03006 DNA-directed RNA polymerase II subunit RPB1 [EC:2.7.7.6]	Hs4505285/3.8e-12/[WV] KOG1216 von Willebrand factor and related coagulation proteins	PTHR40638/1.5E-74/--	NA
CL1086.Contig3_All	614	2.81	1.86	1.9	0.11	0.21	0.31	19.5973	2.67702	-2.87196	3.02002e-05	Down	XP_002953225.1/8.0e-06/hypothetical protein VOLCADRAFT_63308 [Volvox carteri f. nagariensis] >EFJ45824.1 hypothetical protein VOLCADRAFT_63308, partial [Volvox carteri f. nagariensis]	NA	NA	NA	NA	PTHR40638/1.7E-72/--	NA
CL1086.Contig5_All	564	16.96	12.98	13.39	5.69	2.95	4.64	120.604	39.693	-1.60333	8.1294e-09	Down	XP_009403862.1/5.1e-15/PREDICTED: peptide-N4-(N-acetyl-beta-glucosaminyl)asparagine amidase A-like [Musa acuminata subsp. malaccensis]	AK119968.1/0.0/Oryza sativa Japonica Group cDNA clone:002-184-D12, full insert sequence	sp|Q9FPQ6|GP1_CHLRE/7.7e-16/Vegetative cell wall protein gp1 OS=Chlamydomonas reinhardtii GN=GP1 PE=1 SV=1	han:110868128/1.8e-09/proline-rich receptor-like protein kinase PERK5; K04733 interleukin-1 receptor-associated kinase 4 [EC:2.7.11.1]	At5g38560/5.4e-12/[T] KOG1187 Serine/threonine protein kinase	PF08570/3.6E-26/Protein of unknown function (DUF1761)	cellular_component:GO:0016021//integral component of membrane;
CL1087.Contig1_All	677	5.35	6.75	5.03	12.62	11.24	10.99	58.8499	125.668	1.0945	4.83748e-07	Up	XP_005647888.1/1.7e-09/hypothetical protein COCSUDRAFT_41610 [Coccomyxa subellipsoidea C-169] >EIE23344.1 hypothetical protein COCSUDRAFT_41610 [Coccomyxa subellipsoidea C-169]	NA	NA	NA	NA	NA	NA
CL1087.Contig2_All	658	1.49	0.87	2.31	5.93	10.35	5.99	16.0877	76.5751	2.25092	4.81343e-08	Up	XP_005647888.1/1.7e-09/hypothetical protein COCSUDRAFT_41610 [Coccomyxa subellipsoidea C-169] >EIE23344.1 hypothetical protein COCSUDRAFT_41610 [Coccomyxa subellipsoidea C-169]	NA	NA	NA	NA	NA	NA
CL1087.Contig6_All	1312	3.62	3.92	3.44	10.11	9.83	10.67	78.2141	228.292	1.54538	1.20672e-22	Up	EEF24072.1/5.1e-42/gluconate 5-dehydrogenase, putative [Ricinus communis]	NA	sp|P28643|FABG_CUPLA/8.5e-26/3-oxoacyl-[acyl-carrier-protein] reductase, chloroplastic OS=Cuphea lanceolata GN=CLKR27 PE=2 SV=1	cit:102617700/4.5e-27/3-oxoacyl-[acyl-carrier-protein] reductase 4; K00059 3-oxoacyl-[acyl-carrier protein] reductase [EC:1.1.1.100]	CE19130/4.2e-23/[I] KOG1200 Mitochondrial/plastidial beta-ketoacyl-ACP reductase	NA	biological_process:GO:0006633//fatty acid biosynthetic process;molecular_function:GO:0004316//3-oxoacyl-[acyl-carrier-protein] reductase (NADPH) activity;GO:0051287//NAD binding;
CL1093.Contig1_All	6371	2.2	2.9	2.89	6.1	6.73	5.67	288.683	704.765	1.28765	1.25268e-28	Up	KDO56248.1/0.0e+00/hypothetical protein CISIN_1g001012mg [Citrus sinensis]	XM_006472008.2/0.0/PREDICTED: Citrus sinensis uncharacterized LOC102607628 (LOC102607628), transcript variant X2, mRNA	NA	cit:102607628/0.0e+00/uncharacterized LOC102607628; K17398 DNA (cytosine-5)-methyltransferase 3A [EC:2.1.1.37]	At5g27650/7.0e-217/[R] LSE0304 A PWWP domain protein	PS50812/14.814/PWWP domain profile.	molecular_function:GO:0003676//nucleic acid binding;
CL1093.Contig3_All	2755	7.92	8.44	8.14	3.03	3.41	4.32	375.241	174.649	-1.10336	5.5126e-15	Down	KDO56248.1/2.3e-262/hypothetical protein CISIN_1g001012mg [Citrus sinensis]	XM_006472007.2/0.0/PREDICTED: Citrus sinensis uncharacterized LOC102607628 (LOC102607628), transcript variant X1, mRNA	NA	cit:102607628/3.8e-262/uncharacterized LOC102607628; K17398 DNA (cytosine-5)-methyltransferase 3A [EC:2.1.1.37]	At5g27650/1.6e-112/[R] LSE0304 A PWWP domain protein	PTHR10688/1.0E-116/--	molecular_function:GO:0003676//nucleic acid binding;
CL1095.Contig3_All	387	3.6	2.73	2.27	0.36	0	1.07	14.4203	3.36892	-2.09774	0.00852297	Down	XP_005713572.1/4.7e-12/unnamed protein product [Chondrus crispus] >CDF33753.1 unnamed protein product [Chondrus crispus]	NA	sp|Q9M7X7|RL291_ARATH/1.3e-11/60S ribosomal protein L29-1 OS=Arabidopsis thaliana GN=RPL29A PE=1 SV=1	mng:MNEG_4012/1.6e-12/60S ribosomal protein L29-2; K02905 large subunit ribosomal protein L29e	YFR032c-a/9.7e-21/[J] KOG3504 60S ribosomal protein L29	NA	biological_process:GO:0002181//cytoplasmic translation;GO:0006412//translation;cellular_component:GO:0005840//ribosome;GO:0022625//cytosolic large ribosomal subunit;molecular_function:GO:0003735//structural constituent of ribosome;
CL1096.Contig2_All	2752	2.96	1.81	3.45	5.9	6.57	6.81	126.534	310.956	1.29718	1.07547e-09	Up	XP_006490512.1/0.0e+00/PREDICTED: glutamate synthase [NADH], amyloplastic isoform X3 [Citrus sinensis]	XM_006490448.2/0.0/PREDICTED: Citrus sinensis glutamate synthase [NADH], amyloplastic (LOC102620225), transcript variant X2, mRNA	sp|Q9LV03|GLUT1_ARATH/0.0e+00/Glutamate synthase 1 [NADH], chloroplastic OS=Arabidopsis thaliana GN=GLT1 PE=1 SV=2	cit:102620225/0.0e+00/glutamate synthase [NADH], amyloplastic; K00264 glutamate synthase (NADPH/NADH) [EC:1.4.1.13 1.4.1.14]	At5g53460/0.0e+00/[E] KOG0399 Glutamate synthase	PF01645/2.6E-107/Conserved region in glutamate synthase	NA
CL1096.Contig3_All	7750	27.23	27.14	26.89	56.65	53.59	56.66	3577.4	7760.85	1.1173	7.26862e-268	Up	XP_006490512.1/0.0e+00/PREDICTED: glutamate synthase [NADH], amyloplastic isoform X3 [Citrus sinensis]	XM_006490447.2/0.0/PREDICTED: Citrus sinensis glutamate synthase [NADH], amyloplastic (LOC102620225), transcript variant X1, mRNA	sp|Q03460|GLSN_MEDSA/0.0e+00/Glutamate synthase [NADH], amyloplastic OS=Medicago sativa PE=1 SV=1	tcc:18605743/0.0e+00/glutamate synthase 1 [NADH], chloroplastic; K00264 glutamate synthase (NADPH/NADH) [EC:1.4.1.13 1.4.1.14]	At5g53460/0.0e+00/[E] KOG0399 Glutamate synthase	PF01493/7.4E-81/GXGXG motif	NA
CL1096.Contig4_All	7794	32.81	35.34	32.34	68.85	66.37	68.82	4448.23	9542.02	1.10106	5.13354e-219	Up	XP_006490510.1/0.0e+00/PREDICTED: glutamate synthase 1 [NADH], chloroplastic isoform X1 [Citrus sinensis]	XM_006490448.2/0.0/PREDICTED: Citrus sinensis glutamate synthase [NADH], amyloplastic (LOC102620225), transcript variant X2, mRNA	sp|Q9LV03|GLUT1_ARATH/0.0e+00/Glutamate synthase 1 [NADH], chloroplastic OS=Arabidopsis thaliana GN=GLT1 PE=1 SV=2	tcc:18605743/0.0e+00/glutamate synthase 1 [NADH], chloroplastic; K00264 glutamate synthase (NADPH/NADH) [EC:1.4.1.13 1.4.1.14]	At5g53460/0.0e+00/[E] KOG0399 Glutamate synthase	PF00310/3.8E-182/Glutamine amidotransferases class-II	NA
CL1096.Contig6_All	593	0.65	0.43	0.66	1.42	1.82	1.82	5.55415	15.3669	1.46818	0.0254705	Up	NA	NA	NA	NA	NA	NA	NA
CL11.Contig14_All	5568	2.11	1.93	1.86	0.8	0.99	0.72	184.792	83.3735	-1.14824	4.49888e-10	Down	XP_021637307.1/4.5e-265/uncharacterized protein LOC110633133 isoform X3 [Hevea brasiliensis]	NA	sp|Q9T048|DRL27_ARATH/5.7e-63/Disease resistance protein At4g27190 OS=Arabidopsis thaliana GN=At4g27190 PE=2 SV=1	hbr:110646212/4.3e-196/probable disease resistance protein At4g27220; K13459 disease resistance protein RPS2	NA	PTHR23155/2.2E-214/--	NA
CL11.Contig9_All	5501	0.81	1.91	1.21	0.52	0.43	0.43	120.977	45.6413	-1.40632	4.00882e-05	Down	XP_006471944.1/6.1e-254/PREDICTED: probable disease resistance protein At4g27220 isoform X1 [Citrus sinensis]	NA	sp|Q9T048|DRL27_ARATH/3.5e-65/Disease resistance protein At4g27190 OS=Arabidopsis thaliana GN=At4g27190 PE=2 SV=1	hbr:110646212/2.5e-196/probable disease resistance protein At4g27220; K13459 disease resistance protein RPS2	NA	PTHR23155:SF554/4.2E-207/--	NA
CL110.Contig7_All	887	0	0	0.12	0.31	1.06	0.42	1.01178	7.68511	2.92517	0.00337	Up	XP_015387578.1/5.1e-54/PREDICTED: MAP3K epsilon protein kinase 1-like [Citrus sinensis]	XM_015532092.1/0.0/PREDICTED: Citrus sinensis MAP3K epsilon protein kinase 1-like (LOC107177741), mRNA	sp|Q9LJD8|M3KE1_ARATH/6.8e-51/MAP3K epsilon protein kinase 1 OS=Arabidopsis thaliana GN=M3KE1 PE=1 SV=1	gsl:Gasu_53970/1.6e-20/serine/threonine protein kinase; K06683 cell division control protein CDC15 [EC:2.7.11.1]	At3g13530/1.6e-50/[T] KOG0198 MEKK and related serine/threonine protein kinases	PTHR24361/3.5E-76/--	molecular_function:GO:0005524//ATP binding;GO:0004672//protein kinase activity;
CL1102.Contig3_All	1395	1.4	1.27	1.63	4.88	5.12	5.32	32.9847	121.408	1.87999	7.71812e-16	Up	ETL78508.1/2.0e-73/hypothetical protein L917_20696 [Phytophthora parasitica]	NA	sp|Q9ZRF1|MTDH_FRAAN/9.9e-57/Probable mannitol dehydrogenase OS=Fragaria ananassa GN=CAD PE=2 SV=1	ccaj:109800431/7.2e-60/probable mannitol dehydrogenase; K00083 cinnamyl-alcohol dehydrogenase [EC:1.1.1.195]	YMR318c/5.4e-61/[Q] KOG0023 Alcohol dehydrogenase, class V	PF00107/5.1E-18/Zinc-binding dehydrogenase	molecular_function:GO:0008270//zinc ion binding;GO:0016491//oxidoreductase activity;
CL1105.Contig18_All	4419	0.02	0	0	0.02	0.4	0.24	1.45876	15.8855	3.4449	0.000402936	Up	XP_006448255.1/3.6e-281/hypothetical protein CICLE_v10014169mg [Citrus clementina] >XP_006469178.1 PREDICTED: uncharacterized protein LOC102609255 isoform X1 [Citrus sinensis] >ESR61495.1 hypothetical protein CICLE_v10014169mg [Citrus clementina]	XM_006448191.1/0.0/Citrus clementina hypothetical protein (CICLE_v10014169mg) mRNA, complete cds	NA	csat:104774461/1.2e-55/uridine-cytidine kinase C-like; K00876 uridine kinase [EC:2.7.1.48]	At2g01460/3.1e-155/[TZ] KOG4203 Armadillo/beta-Catenin/plakoglobin	PF00485/1.5E-12/Phosphoribulokinase / Uridine kinase family	cellular_component:GO:0016021//integral component of membrane;molecular_function:GO:0005524//ATP binding;GO:0016301//kinase activity;
CL1105.Contig9_All	2763	0	0	0	1.22	1.02	0.3	1.00454	39.8107	5.30854	3.75378e-10	Up	XP_006448255.1/7.2e-288/hypothetical protein CICLE_v10014169mg [Citrus clementina] >XP_006469178.1 PREDICTED: uncharacterized protein LOC102609255 isoform X1 [Citrus sinensis] >ESR61495.1 hypothetical protein CICLE_v10014169mg [Citrus clementina]	XM_006469115.2/0.0/PREDICTED: Citrus sinensis uncharacterized LOC102609255 (LOC102609255), transcript variant X1, mRNA	NA	csat:104774461/2.0e-16/uridine-cytidine kinase C-like; K00876 uridine kinase [EC:2.7.1.48]	At2g01460/1.1e-86/[TZ] KOG4203 Armadillo/beta-Catenin/plakoglobin	PTHR10285/1.5E-249/--	cellular_component:GO:0016021//integral component of membrane;molecular_function:GO:0005524//ATP binding;GO:0016301//kinase activity;
CL1106.Contig8_All	1292	2.2	1.51	1.36	6.64	6.24	6.1	35.6391	138.205	1.95528	1.07309e-16	Up	XP_004229884.1/3.9e-26/PREDICTED: CAAX prenyl protease 1 homolog [Solanum lycopersicum]	XM_002320785.2/0.0/Populus trichocarpa CAAX protease family protein (POPTR_0014s08490g) mRNA, complete cds	sp|Q8RX88|FACE1_ARATH/3.2e-25/CAAX prenyl protease 1 homolog OS=Arabidopsis thaliana GN=FACE1 PE=1 SV=1	sly:101247858/5.7e-27/CAAX prenyl protease 1 homolog; K06013 STE24 endopeptidase [EC:3.4.24.84]	At4g01320/7.5e-25/[R] KOG2719 Metalloprotease	NA	biological_process:GO:0071586//CAAX-box protein processing;cellular_component:GO:0030176//integral component of endoplasmic reticulum membrane;GO:0016021//integral component of membrane;GO:0005773//vacuole;molecular_function:GO:0004222//metalloendopeptidase activity;
CL1107.Contig2_All	1092	0	0	0	1.16	1.03	1.12	0.758576	18.7309	4.62598	1.49265e-07	Up	KDO83779.1/9.7e-79/hypothetical protein CISIN_1g025146mg [Citrus sinensis]	XM_006434431.1/0.0/Citrus clementina hypothetical protein (CICLE_v10002223mg) mRNA, complete cds	sp|Q9C8C1|LCV2_ARATH/2.3e-72/Protein LIKE COV 2 OS=Arabidopsis thaliana GN=LCV2 PE=2 SV=1	NA	NA	PTHR31876/7.1E-127/--	NA
CL1108.Contig1_All	1841	0.59	0	0.5	0.03	0	0.01	9.59571	1.06803	-3.16744	0.00285621	Down	KDO86939.1/3.3e-156/hypothetical protein CISIN_1g012298mg [Citrus sinensis]	XR_001687427.1/0.0/PREDICTED: Gossypium hirsutum uncharacterized LOC107910004 (LOC107910004), transcript variant X3, misc_RNA	NA	thj:104810942/2.1e-06/ubiquitin carboxyl-terminal hydrolase 8 isoform X1; K21343 ubiquitin carboxyl-terminal hydrolase 15 [EC:3.4.19.12]	NA	PTHR34210:SF2/1.1E-175/--	NA
CL1108.Contig15_All	2533	0.56	0.79	0.35	0	0.03	0	22.5971	1.15635	-4.28849	2.00659e-07	Down	KDO86941.1/6.9e-136/hypothetical protein CISIN_1g012298mg [Citrus sinensis]	XM_006444478.1/0.0/Citrus clementina hypothetical protein (CICLE_v10023332mg) mRNA, complete cds	NA	thj:104810942/2.9e-06/ubiquitin carboxyl-terminal hydrolase 8 isoform X1; K21343 ubiquitin carboxyl-terminal hydrolase 15 [EC:3.4.19.12]	NA	PTHR34210/5.8E-174/--	NA
CL111.Contig1_All	1028	0.6	0.93	0.38	0.1	0.18	0.15	9.41031	2.54093	-1.88889	0.0307449	Down	AAQ75384.1/4.5e-102/putative opsin [Oryza sativa Indica Group]	NA	NA	NA	Hs4505285/9.9e-12/[WV] KOG1216 von Willebrand factor and related coagulation proteins	SM01021/5.2E-93/Bacteriorhodopsin-like protein	cellular_component:GO:0016021//integral component of membrane;molecular_function:GO:0005216//ion channel activity;
CL1110.Contig1_All	429	2.53	1.89	1.94	4.98	4.87	3.45	13.2115	27.9057	1.07876	0.0302796	Up	NA	NA	sp|O82713|RL41_QUESU/4.2e-06/60S ribosomal protein L41 OS=Quercus suber GN=RPL41 PE=3 SV=1	NA	SPAC31F10.18c/8.9e-07/[J] KOG4752 Ribosomal protein L41	NA	NA
CL1111.Contig1_All	2921	20.94	21.61	19.99	10.13	9.68	8.62	1020	489.677	-1.05866	7.7989e-45	Down	XP_006473840.1/0.0e+00/PREDICTED: uncharacterized protein LOC102629276 [Citrus sinensis]	XM_006473777.2/0.0/PREDICTED: Citrus sinensis uncharacterized LOC102629276 (LOC102629276), mRNA	sp|Q9C8E6|PMI1_ARATH/4.8e-255/Protein PLASTID MOVEMENT IMPAIRED 1 OS=Arabidopsis thaliana GN=PMI1 PE=1 SV=1	NA	NA	PF10358/2.2E-15/N-terminal C2 in EEIG1 and EHBP1 proteins	biological_process:GO:0009902//chloroplast relocation;cellular_component:GO:0005623//cell;
CL1111.Contig3_All	3129	4.33	4.98	5.44	1.62	2.17	1.06	256.534	90.0792	-1.50988	1.22239e-10	Down	XP_006473840.1/0.0e+00/PREDICTED: uncharacterized protein LOC102629276 [Citrus sinensis]	XM_018122016.1/0.0/PREDICTED: Theobroma cacao protein PLASTID MOVEMENT IMPAIRED 1 (LOC18598859), mRNA	sp|Q9C8E6|PMI1_ARATH/5.4e-244/Protein PLASTID MOVEMENT IMPAIRED 1 OS=Arabidopsis thaliana GN=PMI1 PE=1 SV=1	NA	NA	PTHR33414/0.0/--	biological_process:GO:0009902//chloroplast relocation;cellular_component:GO:0005623//cell;
CL1111.Contig4_All	3062	0	0	0	0.1	0.47	1.56	1.28375	36.7162	4.83798	9.18235e-08	Up	XP_006473840.1/0.0e+00/PREDICTED: uncharacterized protein LOC102629276 [Citrus sinensis]	XM_021830761.1/0.0/PREDICTED: Hevea brasiliensis protein PLASTID MOVEMENT IMPAIRED 1 (LOC110669231), transcript variant X2, mRNA	sp|Q9C8E6|PMI1_ARATH/2.4e-244/Protein PLASTID MOVEMENT IMPAIRED 1 OS=Arabidopsis thaliana GN=PMI1 PE=1 SV=1	NA	NA	PTHR33414:SF2/0.0/--	biological_process:GO:0009902//chloroplast relocation;cellular_component:GO:0005623//cell;
CL1111.Contig7_All	3020	13.48	14.14	15.13	4.76	4.32	6.39	720.271	276.162	-1.38302	2.7274e-26	Down	XP_012073593.1/0.0e+00/protein PLASTID MOVEMENT IMPAIRED 1 [Jatropha curcas] >KDP36752.1 hypothetical protein JCGZ_08043 [Jatropha curcas]	XM_018122016.1/0.0/PREDICTED: Theobroma cacao protein PLASTID MOVEMENT IMPAIRED 1 (LOC18598859), mRNA	sp|Q9C8E6|PMI1_ARATH/8.0e-245/Protein PLASTID MOVEMENT IMPAIRED 1 OS=Arabidopsis thaliana GN=PMI1 PE=1 SV=1	NA	NA	PTHR33414/0.0/--	biological_process:GO:0009902//chloroplast relocation;cellular_component:GO:0005623//cell;
CL1115.Contig1_All	307	3.38	5.73	5.44	9.57	9.36	10.58	19.6219	40.6243	1.04988	0.00956258	Up	NA	LT594794.1/0.0/Theobroma cacao genome assembly, chromosome: VII	NA	NA	NA	NA	NA
CL1115.Contig3_All	2077	8.89	12.9	11.08	22.8	30.7	21.94	378.013	911.81	1.2703	8.18906e-17	Up	XP_006424867.1/3.0e-230/hypothetical protein CICLE_v10028346mg [Citrus clementina] >ESR38107.1 hypothetical protein CICLE_v10028346mg [Citrus clementina]	XM_006424804.1/0.0/Citrus clementina hypothetical protein (CICLE_v10028346mg) mRNA, complete cds	sp|O81077|ABAH2_ARATH/2.8e-188/Abscisic acid 8'-hydroxylase 2 OS=Arabidopsis thaliana GN=CYP707A2 PE=2 SV=1	cit:102627021/4.2e-229/CYP707A2; abscisic acid 8'-hydroxylase 2-like; K09843 (+)-abscisic acid 8'-hydroxylase [EC:1.14.13.93]	At2g29090/6.5e-188/[QI] KOG0157 Cytochrome P450 CYP4/CYP19/CYP26 subfamilies	PF00067/8.7E-75/Cytochrome P450	cellular_component:GO:0016021//integral component of membrane;molecular_function:GO:0016705//oxidoreductase activity, acting on paired donors, with incorporation or reduction of molecular oxygen;GO:0020037//heme binding;GO:0005506//iron ion binding;GO:0004497//monooxygenase activity;
CL1115.Contig4_All	1940	30.42	27.65	29.01	65.5	54.52	63.66	931.159	2070.63	1.15297	2.80882e-53	Up	XP_006424867.1/2.8e-230/hypothetical protein CICLE_v10028346mg [Citrus clementina] >ESR38107.1 hypothetical protein CICLE_v10028346mg [Citrus clementina]	XM_006424804.1/0.0/Citrus clementina hypothetical protein (CICLE_v10028346mg) mRNA, complete cds	sp|O81077|ABAH2_ARATH/2.6e-188/Abscisic acid 8'-hydroxylase 2 OS=Arabidopsis thaliana GN=CYP707A2 PE=2 SV=1	cit:102627021/3.9e-229/CYP707A2; abscisic acid 8'-hydroxylase 2-like; K09843 (+)-abscisic acid 8'-hydroxylase [EC:1.14.13.93]	At2g29090/6.1e-188/[QI] KOG0157 Cytochrome P450 CYP4/CYP19/CYP26 subfamilies	PS00086/-/Cytochrome P450 cysteine heme-iron ligand signature.	cellular_component:GO:0016021//integral component of membrane;molecular_function:GO:0016705//oxidoreductase activity, acting on paired donors, with incorporation or reduction of molecular oxygen;GO:0020037//heme binding;GO:0005506//iron ion binding;GO:0004497//monooxygenase activity;
CL1120.Contig2_All	1425	0.99	0.63	0.5	1.01	1.63	1.92	16.2382	36.3706	1.16338	0.0207406	Up	XP_021690560.1/6.7e-80/putative laccase-9 [Hevea brasiliensis]	XM_021817428.1/0.0/PREDICTED: Hevea brasiliensis putative laccase-9 (LOC110659479), mRNA	sp|Q9FY79|LAC14_ARATH/2.5e-47/Laccase-14 OS=Arabidopsis thaliana GN=LAC14 PE=2 SV=1	hbr:110672171/9.9e-81/putative laccase-9; K05909 laccase [EC:1.10.3.2]	At5g09360/5.9e-47/[Q] KOG1263 Multicopper oxidases	PTHR11709:SF118/8.2E-72/--	NA
CL1123.Contig1_All	452	9.67	8.12	6.66	3.01	3.09	3.09	52.3008	21.2431	-1.29984	0.00026819	Down	XP_005705840.1/1.8e-34/hypothetical protein Gasu_33260 [Galdieria sulphuraria] >EME29320.1 hypothetical protein Gasu_33260 [Galdieria sulphuraria]	XM_011401839.1/0.0/Auxenochlorella protothecoides 60S ribosomal protein L37a partial mRNA	sp|Q9XHE4|RL37A_GOSHI/7.2e-33/60S ribosomal protein L37a OS=Gossypium hirsutum GN=RPL37A PE=3 SV=1	cme:CYME_CMN315C/4.9e-34/60S ribosomal protein L37A; K02921 large subunit ribosomal protein L37Ae	7296944/2.4e-34/[J] KOG0402 60S ribosomal protein L37	NA	biological_process:GO:0006412//translation;cellular_component:GO:0005840//ribosome;molecular_function:GO:0003735//structural constituent of ribosome;
CL1123.Contig2_All	392	1.95	1.93	1.98	0.36	0.18	0.18	10.0605	1.89883	-2.40551	0.00389393	Down	XP_005705840.1/4.7e-36/hypothetical protein Gasu_33260 [Galdieria sulphuraria] >EME29320.1 hypothetical protein Gasu_33260 [Galdieria sulphuraria]	XM_009524055.1/0.0/Phytophthora sojae putative ribosomal protein partial mRNA	sp|Q9XHE4|RL37A_GOSHI/8.7e-35/60S ribosomal protein L37a OS=Gossypium hirsutum GN=RPL37A PE=3 SV=1	apro:F751_4444/5.0e-35/60S ribosomal protein L37a; K02921 large subunit ribosomal protein L37Ae	7296944/9.2e-35/[J] KOG0402 60S ribosomal protein L37	NA	biological_process:GO:0006412//translation;cellular_component:GO:0005840//ribosome;molecular_function:GO:0003735//structural constituent of ribosome;
CL1125.Contig1_All	3762	0.12	0.27	0.65	0.87	0.71	0.93	22.3041	54.3869	1.28595	0.0285551	Up	XP_006429447.1/0.0e+00/hypothetical protein CICLE_v10010939mg [Citrus clementina] >XP_006481079.1 PREDICTED: receptor-like protein 12 [Citrus sinensis] >ESR42687.1 hypothetical protein CICLE_v10010939mg [Citrus clementina]	XM_006481016.2/0.0/PREDICTED: Citrus sinensis receptor-like protein 12 (LOC102620171), mRNA	sp|Q9C9H7|RLP12_ARATH/7.0e-97/Receptor-like protein 12 OS=Arabidopsis thaliana GN=RLP12 PE=2 SV=2	sly:101263330/2.4e-105/Eix2; EIX receptor 2; K13466 EIX receptor 1/2	At1g45616/5.7e-150/[R] KOG0619 FOG: Leucine rich repeat	PTHR27004:SF37/0.0/--	cellular_component:GO:0016021//integral component of membrane;
CL1127.Contig1_All	1416	9.5	10.42	10.3	17.65	20.46	22.37	231.874	489.193	1.07706	1.07386e-19	Up	XP_021671687.1/4.7e-134/RHOMBOID-like protein 3 [Hevea brasiliensis]	XM_006490281.2/0.0/PREDICTED: Citrus sinensis RHOMBOID-like protein 2 (LOC102624089), mRNA	sp|Q9LYP1|RBL3_ARATH/1.5e-121/RHOMBOID-like protein 3 OS=Arabidopsis thaliana GN=RBL3 PE=2 SV=1	ghi:107900980/1.0e-08/dolichyl-phosphate beta-glucosyltransferase-like; K00729 dolichyl-phosphate beta-glucosyltransferase [EC:2.4.1.117]	At5g07250/3.6e-121/[T] KOG2289 Rhomboid family proteins	PTHR22936:SF35/1.7E-195/--	cellular_component:GO:0016021//integral component of membrane;molecular_function:GO:0004252//serine-type endopeptidase activity;
CL1127.Contig6_All	1633	16.16	17.03	14.62	34.92	31.65	31.75	426.982	925.077	1.1154	3.19064e-43	Up	XP_021671687.1/5.9e-157/RHOMBOID-like protein 3 [Hevea brasiliensis]	XM_006490281.2/0.0/PREDICTED: Citrus sinensis RHOMBOID-like protein 2 (LOC102624089), mRNA	sp|Q9LYP1|RBL3_ARATH/9.3e-139/RHOMBOID-like protein 3 OS=Arabidopsis thaliana GN=RBL3 PE=2 SV=1	ghi:107900980/4.7e-10/dolichyl-phosphate beta-glucosyltransferase-like; K00729 dolichyl-phosphate beta-glucosyltransferase [EC:2.4.1.117]	At5g07250/2.2e-138/[T] KOG2289 Rhomboid family proteins	PF01694/2.1E-52/Rhomboid family	NA
CL1132.Contig2_All	2755	0.3	0.42	0.34	2.55	2.73	3.23	16.7705	136.555	3.02548	4.46269e-27	Up	XP_006439039.1/0.0e+00/hypothetical protein CICLE_v10030742mg [Citrus clementina] >ESR52279.1 hypothetical protein CICLE_v10030742mg [Citrus clementina]	XM_006438976.1/0.0/Citrus clementina hypothetical protein (CICLE_v10030742mg) mRNA, complete cds	sp|Q0JEU6|LERK3_ORYSJ/1.5e-202/G-type lectin S-receptor-like serine/threonine-protein kinase LECRK3 OS=Oryza sativa subsp. japonica GN=LECRK3 PE=3 SV=2	pavi:110767936/4.4e-202/G-type lectin S-receptor-like serine/threonine-protein kinase LECRK3; K04733 interleukin-1 receptor-associated kinase 4 [EC:2.7.11.1]	At5g24080/5.4e-105/[T] LSE0015 A Receptor-like protein kinase, contains lectin domains	PS50927/12.364/Bulb-type lectin domain profile.	biological_process:GO:0006468//protein phosphorylation;cellular_component:GO:0016021//integral component of membrane;GO:0005886//plasma membrane;molecular_function:GO:0004674//protein serine/threonine kinase activity;GO:0005524//ATP binding;
CL1134.Contig1_All	1888	2.55	2.21	2.09	5.29	6.18	5.7	70.8411	187.259	1.40238	5.86436e-15	Up	XP_006426316.1/5.6e-90/hypothetical protein CICLE_v10025698mg [Citrus clementina] >ESR39556.1 hypothetical protein CICLE_v10025698mg [Citrus clementina]	XM_006466211.2/0.0/PREDICTED: Citrus sinensis RING-H2 finger protein ATL52-like (LOC102627101), mRNA	sp|Q9LX93|ATL55_ARATH/1.2e-41/E3 ubiquitin-protein ligase RING1 OS=Arabidopsis thaliana GN=ATL55 PE=1 SV=1	vvi:100854068/5.6e-63/RING-H2 finger protein ATL54; K10664 E3 ubiquitin-protein ligase ATL6/9/15/31/42/55 [EC:2.3.2.27]	At5g10380/2.9e-41/[O] KOG0800 FOG: Predicted E3 ubiquitin ligase	SM00184/1.1E-7/Ring finger	cellular_component:GO:0016021//integral component of membrane;
CL1136.Contig6_All	1167	2.09	1.69	1.89	0.36	0.3	0.2	34.4655	6.31885	-2.44742	6.01735e-07	Down	XP_005835216.1/1.9e-120/hypothetical protein GUITHDRAFT_86064, partial [Guillardia theta CCMP2712] >EKX48236.1 hypothetical protein GUITHDRAFT_86064, partial [Guillardia theta CCMP2712]	BT102696.1/0.0/Picea glauca clone GQ02011_F06 mRNA sequence	sp|P31683|ENO_CHLRE/4.0e-120/Enolase (Fragment) OS=Chlamydomonas reinhardtii GN=ENO PE=2 SV=1	csl:COCSUDRAFT_38308/1.5e-119/enolase; K01689 enolase [EC:4.2.1.11]	YHR174w/1.7e-140/[G] KOG2670 Enolase	PF03952/2.1E-17/Enolase, N-terminal domain	biological_process:GO:0006096//glycolytic process;cellular_component:GO:0000015//phosphopyruvate hydratase complex;molecular_function:GO:0000287//magnesium ion binding;GO:0004634//phosphopyruvate hydratase activity;
CL1137.Contig5_All	3310	1.21	0.81	0.76	0.22	0.2	0.27	50.5206	13.7158	-1.88104	4.55324e-06	Down	XP_006435612.1/1.1e-168/hypothetical protein CICLE_v10031165mg [Citrus clementina] >ESR48852.1 hypothetical protein CICLE_v10031165mg [Citrus clementina]	XM_006435549.1/0.0/Citrus clementina hypothetical protein (CICLE_v10031165mg) mRNA, complete cds	sp|Q9FN03|UVR8_ARATH/1.5e-26/Ultraviolet-B receptor UVR8 OS=Arabidopsis thaliana GN=UVR8 PE=1 SV=1	atr:110008293/1.9e-13/ultraviolet-B receptor UVR8-like; K10615 E3 ubiquitin-protein ligase HERC4 [EC:2.3.2.26]	At3g55580/1.1e-125/[S] KOG1426 FOG: RCC1 domain	PTHR22870/3.8E-172/--	cellular_component:GO:0016021//integral component of membrane;
CL114.Contig1_All	376	2.93	3.04	2.3	0	0.92	0.18	13.0543	2.43278	-2.42385	0.00476056	Down	NA	NA	NA	NA	NA	NA	NA
CL114.Contig2_All	393	7.55	6.86	5.92	0	0	0.7	35.5075	2.14419	-4.04962	1.05835e-09	Down	NA	NA	sp|P62120|RL41_ARATH/2.9e-06/60S ribosomal protein L41 OS=Arabidopsis thaliana GN=RPL41A PE=3 SV=1	NA	Hs10863875/3.1e-06/[J] KOG4752 Ribosomal protein L41	NA	NA
CL114.Contig3_All	392	7.25	10.69	6.31	1.79	3.33	3.16	43.419	16.2988	-1.41356	0.00140029	Down	NA	NA	sp|P62120|RL41_ARATH/2.9e-06/60S ribosomal protein L41 OS=Arabidopsis thaliana GN=RPL41A PE=3 SV=1	NA	Hs10863875/3.1e-06/[J] KOG4752 Ribosomal protein L41	NA	NA
CL114.Contig4_All	434	3.44	2.79	2.7	0.63	0.62	1.08	17.8531	5.50598	-1.69711	0.00650567	Down	NA	NA	NA	NA	NA	NA	NA
CL1142.Contig2_All	824	6.53	8.35	6.98	1.81	2.23	2.59	92.633	30.0474	-1.62428	4.8193e-09	Down	XP_021836503.1/1.4e-69/60S ribosomal protein L11-1 isoform X2 [Spinacia oleracea] >KNA06849.1 hypothetical protein SOVF_177260 [Spinacia oleracea]	DQ864944.1/0.0/Pfiesteria piscicida clone ppi-5p-102 cytosolic large ribosomal subunit L11 mRNA, partial cds	sp|P42794|RL112_ARATH/1.6e-70/60S ribosomal protein L11-2 OS=Arabidopsis thaliana GN=RPL11B PE=2 SV=2	soe:110776262/2.0e-70/60S ribosomal protein L11-1 isoform X1; K02868 large subunit ribosomal protein L11e	SPBC17G9.10/1.6e-73/[J] KOG0397 60S ribosomal protein L11	NA	biological_process:GO:0006412//translation;cellular_component:GO:0005840//ribosome;molecular_function:GO:0003735//structural constituent of ribosome;
CL1142.Contig3_All	831	3.81	4.23	3.36	0.93	0.28	0.43	48.1014	7.49433	-2.68221	1.51566e-08	Down	XP_021836503.1/2.2e-70/60S ribosomal protein L11-1 isoform X2 [Spinacia oleracea] >KNA06849.1 hypothetical protein SOVF_177260 [Spinacia oleracea]	XM_021458983.1/0.0/PREDICTED: Sorghum bicolor 60S ribosomal protein L11 (LOC8085572), transcript variant X2, mRNA	sp|P42794|RL112_ARATH/1.5e-71/60S ribosomal protein L11-2 OS=Arabidopsis thaliana GN=RPL11B PE=2 SV=2	soe:110783746/3.2e-71/60S ribosomal protein L11-1-like isoform X1; K02868 large subunit ribosomal protein L11e	YGR085c/3.6e-73/[J] KOG0397 60S ribosomal protein L11	NA	biological_process:GO:0006412//translation;cellular_component:GO:0005840//ribosome;molecular_function:GO:0003735//structural constituent of ribosome;
CL1142.Contig4_All	877	8.28	8.16	6.96	1.58	1.29	1.09	106.411	19.1265	-2.47601	5.2686e-18	Down	XP_021843808.1/1.5e-69/60S ribosomal protein L11-1-like isoform X2 [Spinacia oleracea] >XP_021845775.1 60S ribosomal protein L11-1-like isoform X2 [Spinacia oleracea] >KNA07295.1 hypothetical protein SOVF_173280 [Spinacia oleracea] >KNA20157.1 hypothetical protein SOVF_054760 [Spinacia oleracea]	DQ864944.1/0.0/Pfiesteria piscicida clone ppi-5p-102 cytosolic large ribosomal subunit L11 mRNA, partial cds	sp|P42794|RL112_ARATH/1.7e-70/60S ribosomal protein L11-2 OS=Arabidopsis thaliana GN=RPL11B PE=2 SV=2	soe:110776262/2.2e-70/60S ribosomal protein L11-1 isoform X1; K02868 large subunit ribosomal protein L11e	SPBC17G9.10/1.7e-73/[J] KOG0397 60S ribosomal protein L11	NA	biological_process:GO:0006412//translation;cellular_component:GO:0005840//ribosome;molecular_function:GO:0003735//structural constituent of ribosome;
CL1143.Contig1_All	699	7.18	7.77	5.65	2.36	1.78	1.95	73.0657	23.372	-1.64441	1.53364e-07	Down	ETI51712.1/9.3e-51/NAD(P)H:quinone oxidoreductase, type IV [Phytophthora parasitica P1569]	NA	sp|Q9AYU0|QR2_TRIVS/8.3e-44/Quinone-oxidoreductase QR2 OS=Triphysaria versicolor PE=1 SV=1	apro:F751_4228/1.2e-50/NAD(P)H dehydrogenase (quinone); K03809 NAD(P)H dehydrogenase (quinone) [EC:1.6.5.2]	SPAC3C7.14c/2.6e-48/[R] KOG3135 1,4-benzoquinone reductase-like; Trp repressor binding protein-like/protoplast-secreted protein	PS50902/13.656/Flavodoxin-like domain profile.	cellular_component:GO:0005886//plasma membrane;GO:0005737//cytoplasm;molecular_function:GO:0010181//FMN binding;GO:0003955//NAD(P)H dehydrogenase (quinone) activity;
CL1143.Contig2_All	701	11.54	10.06	10.63	2.63	4.34	3.18	114.903	38.7942	-1.5665	4.96751e-10	Down	ETI51712.1/4.2e-51/NAD(P)H:quinone oxidoreductase, type IV [Phytophthora parasitica P1569]	NA	sp|Q9AYU0|QR2_TRIVS/3.7e-44/Quinone-oxidoreductase QR2 OS=Triphysaria versicolor PE=1 SV=1	apro:F751_4228/5.3e-51/NAD(P)H dehydrogenase (quinone); K03809 NAD(P)H dehydrogenase (quinone) [EC:1.6.5.2]	SPAC3C7.14c/1.2e-48/[R] KOG3135 1,4-benzoquinone reductase-like; Trp repressor binding protein-like/protoplast-secreted protein	PTHR30546/6.3E-92/--	cellular_component:GO:0005886//plasma membrane;GO:0005737//cytoplasm;molecular_function:GO:0010181//FMN binding;GO:0003955//NAD(P)H dehydrogenase (quinone) activity;
CL1145.Contig12_All	2933	0.86	0.66	0.59	1.46	1.78	1.15	34.2166	74.8174	1.12868	0.000480771	Up	XP_015385997.1/1.0e-244/PREDICTED: small G protein signaling modulator 1 isoform X1 [Citrus sinensis] >XP_015385998.1 PREDICTED: small G protein signaling modulator 1 isoform X1 [Citrus sinensis] >XP_015385999.1 PREDICTED: small G protein signaling modulator 1 isoform X1 [Citrus sinensis] >XP_015386001.1 PREDICTED: small G protein signaling modulator 1 isoform X1 [Citrus sinensis] >XP_015386002.1…	XM_015530519.1/0.0/PREDICTED: Citrus sinensis small G protein signaling modulator 1 (LOC102612974), transcript variant X8, mRNA	NA	pop:POPTR_0007s01560g/6.8e-225/POPTRDRAFT_802561; RabGAP/TBC domain-containing family protein; K21847 small G protein signaling modulator 1	At2g43490_1/2.3e-186/[T] KOG2197 Ypt/Rab-specific GTPase-activating protein GYP7 and related proteins	PS50086/31.223/TBC/rab GAP domain profile.	NA
CL1157.Contig2_All	1875	4.64	4.47	4.77	1.78	1.84	1.55	142.393	56.169	-1.34203	1.27842e-11	Down	XP_018838072.1/1.5e-225/PREDICTED: carboxyl-terminal-processing peptidase 2, chloroplastic-like isoform X2 [Juglans regia]	XM_006493936.1/0.0/PREDICTED: Citrus sinensis carboxyl-terminal-processing peptidase 2, chloroplastic (LOC102628122), mRNA	sp|O23614|CTPA2_ARATH/2.3e-194/Carboxyl-terminal-processing peptidase 2, chloroplastic OS=Arabidopsis thaliana GN=CTPA2 PE=1 SV=1	cit:102628122/3.3e-225/carboxyl-terminal-processing peptidase 2, chloroplastic; K03797 carboxyl-terminal processing protease [EC:3.4.21.102]	NA	PTHR32060:SF7/0.0/--	molecular_function:GO:0008236//serine-type peptidase activity;
CL1160.Contig1_All	3039	1.04	1.17	1.16	9.02	9.24	9.45	57.2141	496.093	3.11617	1.86723e-108	Up	XP_021674678.1/2.6e-174/U-box domain-containing protein 33-like isoform X1 [Hevea brasiliensis] >XP_021674680.1 U-box domain-containing protein 33-like isoform X1 [Hevea brasiliensis]	XM_019606219.1/0.0/PREDICTED: Lupinus angustifolius U-box domain-containing protein 33-like (LOC109360964), transcript variant X5, mRNA	sp|Q8GUH1|PUB33_ARATH/3.3e-137/U-box domain-containing protein 33 OS=Arabidopsis thaliana GN=PUB33 PE=2 SV=2	hbr:110660084/8.4e-162/U-box domain-containing protein 33-like; K04733 interleukin-1 receptor-associated kinase 4 [EC:2.7.11.1]	At2g45910/3.3e-132/[T] TWOG0129 Protein kinase, contains U-box domains	PS50011/22.93/Protein kinase domain profile.	NA
CL1160.Contig2_All	2903	3.79	4.41	3.53	22.22	19.06	20.75	190.426	1060.49	2.47744	4.16518e-137	Up	XP_021674678.1/1.3e-199/U-box domain-containing protein 33-like isoform X1 [Hevea brasiliensis] >XP_021674680.1 U-box domain-containing protein 33-like isoform X1 [Hevea brasiliensis]	XM_019606219.1/0.0/PREDICTED: Lupinus angustifolius U-box domain-containing protein 33-like (LOC109360964), transcript variant X5, mRNA	sp|Q8GUH1|PUB33_ARATH/1.1e-161/U-box domain-containing protein 33 OS=Arabidopsis thaliana GN=PUB33 PE=2 SV=2	hbr:110660084/8.8e-185/U-box domain-containing protein 33-like; K04733 interleukin-1 receptor-associated kinase 4 [EC:2.7.11.1]	At2g45910/1.1e-156/[T] TWOG0129 Protein kinase, contains U-box domains	PS50011/22.93/Protein kinase domain profile.	molecular_function:GO:0005524//ATP binding;GO:0004672//protein kinase activity;GO:0004842//ubiquitin-protein transferase activity;
CL1160.Contig3_All	2833	2.46	2.13	2.55	19.22	20.7	19.85	113.212	996.832	3.13833	1.21263e-206	Up	XP_021674678.1/1.8e-185/U-box domain-containing protein 33-like isoform X1 [Hevea brasiliensis] >XP_021674680.1 U-box domain-containing protein 33-like isoform X1 [Hevea brasiliensis]	XM_019606219.1/0.0/PREDICTED: Lupinus angustifolius U-box domain-containing protein 33-like (LOC109360964), transcript variant X5, mRNA	sp|Q8GUH1|PUB33_ARATH/3.4e-152/U-box domain-containing protein 33 OS=Arabidopsis thaliana GN=PUB33 PE=2 SV=2	hbr:110660084/9.9e-173/U-box domain-containing protein 33-like; K04733 interleukin-1 receptor-associated kinase 4 [EC:2.7.11.1]	At2g45910/3.4e-147/[T] TWOG0129 Protein kinase, contains U-box domains	PS50011/22.916/Protein kinase domain profile.	NA
CL1160.Contig4_All	1358	0.18	0.44	0	1.73	0.98	1.06	5.46582	27.6442	2.33847	0.00076177	Up	XP_021906291.1/6.6e-101/U-box domain-containing protein 33-like [Carica papaya] >XP_021906292.1 U-box domain-containing protein 33-like [Carica papaya] >XP_021906293.1 U-box domain-containing protein 33-like [Carica papaya]	XM_019606219.1/0.0/PREDICTED: Lupinus angustifolius U-box domain-containing protein 33-like (LOC109360964), transcript variant X5, mRNA	sp|Q8GUH1|PUB33_ARATH/1.8e-82/U-box domain-containing protein 33 OS=Arabidopsis thaliana GN=PUB33 PE=2 SV=2	cpap:110820954/9.7e-102/U-box domain-containing protein 33-like; K04733 interleukin-1 receptor-associated kinase 4 [EC:2.7.11.1]	At2g45910/4.1e-82/[T] TWOG0129 Protein kinase, contains U-box domains	PS50011/21.687/Protein kinase domain profile.	NA
CL1160.Contig5_All	2979	0.69	0	0.3	4.35	3.48	4.26	36.989	191.218	2.37005	0.0308327	Up	XP_021674678.1/2.2e-178/U-box domain-containing protein 33-like isoform X1 [Hevea brasiliensis] >XP_021674680.1 U-box domain-containing protein 33-like isoform X1 [Hevea brasiliensis]	XM_019606219.1/0.0/PREDICTED: Lupinus angustifolius U-box domain-containing protein 33-like (LOC109360964), transcript variant X5, mRNA	sp|Q8GUH1|PUB33_ARATH/2.7e-144/U-box domain-containing protein 33 OS=Arabidopsis thaliana GN=PUB33 PE=2 SV=2	hbr:110660084/4.0e-164/U-box domain-containing protein 33-like; K04733 interleukin-1 receptor-associated kinase 4 [EC:2.7.11.1]	At2g45910/2.8e-139/[T] TWOG0129 Protein kinase, contains U-box domains	PS00108/-/Serine/Threonine protein kinases active-site signature.	NA
CL1161.Contig1_All	2218	7.65	6.63	8.71	3.05	3.29	2.26	281.549	111.575	-1.33538	1.43617e-13	Down	XP_007035291.2/4.6e-277/PREDICTED: glutamyl-tRNA(Gln) amidotransferase subunit B, chloroplastic/mitochondrial [Theobroma cacao] >XP_007035292.2 PREDICTED: glutamyl-tRNA(Gln) amidotransferase subunit B, chloroplastic/mitochondrial [Theobroma cacao] >XP_017975782.1 PREDICTED: glutamyl-tRNA(Gln) amidotransferase subunit B, chloroplastic/mitochondrial [Theobroma cacao] >XP_017975783.1 PREDICTED: glut…	XM_021814750.1/0.0/PREDICTED: Hevea brasiliensis glutamyl-tRNA(Gln) amidotransferase subunit B, chloroplastic/mitochondrial (LOC110657513), transcript variant X1, mRNA	sp|B9SQR9|GATB_RICCO/6.2e-271/Glutamyl-tRNA(Gln) amidotransferase subunit B, chloroplastic/mitochondrial OS=Ricinus communis GN=GATB PE=3 SV=1	tcc:18603327/6.8e-278/glutamyl-tRNA(Gln) amidotransferase subunit B, chloroplastic/mitochondrial; K02434 aspartyl-tRNA(Asn)/glutamyl-tRNA(Gln) amidotransferase subunit B [EC:6.3.5.6 6.3.5.7]	At1g48520/2.4e-249/[J] KOG2438 Glutamyl-tRNA amidotransferase subunit B	PS01234/-/Glutamyl-tRNA(Gln) amidotransferase subunit B signature.	biological_process:GO:0032543//mitochondrial translation;GO:0070681//glutaminyl-tRNAGln biosynthesis via transamidation;cellular_component:GO:0005739//mitochondrion;GO:0030956//glutamyl-tRNA(Gln) amidotransferase complex;GO:0009507//chloroplast;molecular_function:GO:0005524//ATP binding;GO:0050567//glutaminyl-tRNA synthase (glutamine-hydrolyzing) activity;GO:0016740//transferase activity;
CL1161.Contig2_All	2208	8.6	8.5	8.54	3.42	3.49	3.29	313.141	132.035	-1.24589	2.62703e-23	Down	XP_007035291.2/4.6e-277/PREDICTED: glutamyl-tRNA(Gln) amidotransferase subunit B, chloroplastic/mitochondrial [Theobroma cacao] >XP_007035292.2 PREDICTED: glutamyl-tRNA(Gln) amidotransferase subunit B, chloroplastic/mitochondrial [Theobroma cacao] >XP_017975782.1 PREDICTED: glutamyl-tRNA(Gln) amidotransferase subunit B, chloroplastic/mitochondrial [Theobroma cacao] >XP_017975783.1 PREDICTED: glut…	XM_021814750.1/0.0/PREDICTED: Hevea brasiliensis glutamyl-tRNA(Gln) amidotransferase subunit B, chloroplastic/mitochondrial (LOC110657513), transcript variant X1, mRNA	sp|B9SQR9|GATB_RICCO/6.2e-271/Glutamyl-tRNA(Gln) amidotransferase subunit B, chloroplastic/mitochondrial OS=Ricinus communis GN=GATB PE=3 SV=1	tcc:18603327/6.8e-278/glutamyl-tRNA(Gln) amidotransferase subunit B, chloroplastic/mitochondrial; K02434 aspartyl-tRNA(Asn)/glutamyl-tRNA(Gln) amidotransferase subunit B [EC:6.3.5.6 6.3.5.7]	At1g48520/2.4e-249/[J] KOG2438 Glutamyl-tRNA amidotransferase subunit B	PS01234/-/Glutamyl-tRNA(Gln) amidotransferase subunit B signature.	biological_process:GO:0032543//mitochondrial translation;GO:0070681//glutaminyl-tRNAGln biosynthesis via transamidation;cellular_component:GO:0005739//mitochondrion;GO:0030956//glutamyl-tRNA(Gln) amidotransferase complex;GO:0009507//chloroplast;molecular_function:GO:0005524//ATP binding;GO:0050567//glutaminyl-tRNA synthase (glutamine-hydrolyzing) activity;GO:0016740//transferase activity;
CL1161.Contig3_All	2296	3.72	3.87	3.47	0.25	0.99	1.3	138.316	35.2259	-1.97326	2.84956e-06	Down	XP_007035291.2/4.7e-277/PREDICTED: glutamyl-tRNA(Gln) amidotransferase subunit B, chloroplastic/mitochondrial [Theobroma cacao] >XP_007035292.2 PREDICTED: glutamyl-tRNA(Gln) amidotransferase subunit B, chloroplastic/mitochondrial [Theobroma cacao] >XP_017975782.1 PREDICTED: glutamyl-tRNA(Gln) amidotransferase subunit B, chloroplastic/mitochondrial [Theobroma cacao] >XP_017975783.1 PREDICTED: glut…	XM_021814750.1/0.0/PREDICTED: Hevea brasiliensis glutamyl-tRNA(Gln) amidotransferase subunit B, chloroplastic/mitochondrial (LOC110657513), transcript variant X1, mRNA	sp|B9SQR9|GATB_RICCO/6.5e-271/Glutamyl-tRNA(Gln) amidotransferase subunit B, chloroplastic/mitochondrial OS=Ricinus communis GN=GATB PE=3 SV=1	tcc:18603327/7.0e-278/glutamyl-tRNA(Gln) amidotransferase subunit B, chloroplastic/mitochondrial; K02434 aspartyl-tRNA(Asn)/glutamyl-tRNA(Gln) amidotransferase subunit B [EC:6.3.5.6 6.3.5.7]	At1g48520/2.5e-249/[J] KOG2438 Glutamyl-tRNA amidotransferase subunit B	PS01234/-/Glutamyl-tRNA(Gln) amidotransferase subunit B signature.	biological_process:GO:0032543//mitochondrial translation;GO:0070681//glutaminyl-tRNAGln biosynthesis via transamidation;cellular_component:GO:0005739//mitochondrion;GO:0030956//glutamyl-tRNA(Gln) amidotransferase complex;GO:0009507//chloroplast;molecular_function:GO:0005524//ATP binding;GO:0050567//glutaminyl-tRNA synthase (glutamine-hydrolyzing) activity;GO:0016740//transferase activity;
CL1164.Contig1_All	1307	7.26	6.76	5.91	3.12	2.97	2.57	139.801	64.5623	-1.11461	6.48081e-08	Down	XP_018815948.1/1.3e-157/PREDICTED: protein SRG1-like [Juglans regia]	XM_018122575.1/0.0/PREDICTED: Theobroma cacao protein SRG1 (LOC18596583), mRNA	sp|Q39224|SRG1_ARATH/2.8e-109/Protein SRG1 OS=Arabidopsis thaliana GN=SRG1 PE=2 SV=1	nnu:104609672/4.4e-51/flavonol synthase/flavanone 3-hydroxylase-like; K05278 flavonol synthase [EC:1.14.11.23]	At4g25300/4.9e-109/[QR] KOG0143 Iron/ascorbate family oxidoreductases	PTHR10209:SF130/1.0E-232/--	molecular_function:GO:0046872//metal ion binding;GO:0016491//oxidoreductase activity;
CL1164.Contig2_All	1333	9.34	7.58	8.96	4.27	3.38	3.41	186.196	84.4747	-1.14023	9.79513e-10	Down	XP_018815948.1/9.8e-158/PREDICTED: protein SRG1-like [Juglans regia]	XM_018122575.1/0.0/PREDICTED: Theobroma cacao protein SRG1 (LOC18596583), mRNA	sp|Q39224|SRG1_ARATH/2.8e-109/Protein SRG1 OS=Arabidopsis thaliana GN=SRG1 PE=2 SV=1	nnu:104609672/1.5e-51/flavonol synthase/flavanone 3-hydroxylase-like; K05278 flavonol synthase [EC:1.14.11.23]	At4g25300/1.7e-109/[QR] KOG0143 Iron/ascorbate family oxidoreductases	PTHR10209/2.2E-232/--	molecular_function:GO:0046872//metal ion binding;GO:0016491//oxidoreductase activity;
CL1165.Contig1_All	783	20.74	20.42	17.55	6.63	8.74	6.74	237.016	94.1796	-1.3315	1.03846e-14	Down	XP_011031730.1/3.2e-52/PREDICTED: 20 kDa chaperonin, chloroplastic-like [Populus euphratica]	XM_012228366.2/0.0/PREDICTED: Jatropha curcas 10 kDa chaperonin 1, chloroplastic (LOC105643263), mRNA	sp|Q9M1C2|CH101_ARATH/1.3e-50/10 kDa chaperonin 1, chloroplastic OS=Arabidopsis thaliana GN=CPN10-1 PE=2 SV=1	cit:102615745/1.4e-52/10 kDa chaperonin; K04078 chaperonin GroES	At3g60210/3.1e-50/[O] KOG1641 Mitochondrial chaperonin	SM00883/2.4E-13/Chaperonin 10 Kd subunit	biological_process:GO:0006457//protein folding;GO:0006986//response to unfolded protein;GO:0051085//chaperone cofactor-dependent protein refolding;cellular_component:GO:0005759//mitochondrial matrix;GO:0005737//cytoplasm;GO:0009507//chloroplast;molecular_function:GO:0051087//chaperone binding;GO:0046872//metal ion binding;GO:0051082//unfolded protein binding;
CL1165.Contig2_All	766	23.81	22.24	22.55	11.17	9.39	10.98	270.429	131.372	-1.0416	5.87637e-14	Down	XP_011031730.1/3.2e-52/PREDICTED: 20 kDa chaperonin, chloroplastic-like [Populus euphratica]	XM_012228366.2/0.0/PREDICTED: Jatropha curcas 10 kDa chaperonin 1, chloroplastic (LOC105643263), mRNA	sp|Q9M1C2|CH101_ARATH/1.3e-50/10 kDa chaperonin 1, chloroplastic OS=Arabidopsis thaliana GN=CPN10-1 PE=2 SV=1	cit:102615745/1.4e-52/10 kDa chaperonin; K04078 chaperonin GroES	At3g60210/3.0e-50/[O] KOG1641 Mitochondrial chaperonin	PF00166/1.7E-14/Chaperonin 10 Kd subunit	biological_process:GO:0006457//protein folding;GO:0006986//response to unfolded protein;GO:0051085//chaperone cofactor-dependent protein refolding;cellular_component:GO:0005759//mitochondrial matrix;GO:0005737//cytoplasm;GO:0009507//chloroplast;molecular_function:GO:0051087//chaperone binding;GO:0046872//metal ion binding;GO:0051082//unfolded protein binding;
CL117.Contig1_All	991	28.44	26.28	29.53	77.63	75.36	81.17	441.67	1293.43	1.55017	4.04617e-113	Up	XP_006486929.1/8.2e-61/PREDICTED: LOB domain-containing protein 38-like [Citrus sinensis]	XM_010533280.2/0.0/PREDICTED: Tarenaya hassleriana LOB domain-containing protein 39 (LOC104807853), mRNA	sp|Q9SN23|LBD38_ARATH/2.7e-48/LOB domain-containing protein 38 OS=Arabidopsis thaliana GN=LBD38 PE=1 SV=1	NA	At3g49940/6.3e-48/[R] LSE0040 A Lateral organ boundaries domain (LOB)	PF03195/4.0E-24/Protein of unknown function DUF260	NA
CL117.Contig2_All	348	3.84	3.34	3.41	11.06	10.97	11.89	16.5389	54.6213	1.7236	4.53027e-07	Up	XP_006422841.1/1.5e-22/hypothetical protein CICLE_v10029274mg [Citrus clementina] >XP_006422842.1 hypothetical protein CICLE_v10029274mg [Citrus clementina] >ESR36081.1 hypothetical protein CICLE_v10029274mg [Citrus clementina] >ESR36082.1 hypothetical protein CICLE_v10029274mg [Citrus clementina]	XM_010533280.2/0.0/PREDICTED: Tarenaya hassleriana LOB domain-containing protein 39 (LOC104807853), mRNA	sp|Q9FN11|LBD37_ARATH/4.1e-20/LOB domain-containing protein 37 OS=Arabidopsis thaliana GN=LBD37 PE=2 SV=1	NA	At5g67420/9.6e-20/[R] LSE0040 A Lateral organ boundaries domain (LOB)	PS50891/11.11/LOB domain profile.	NA
CL1170.Contig1_All	1251	0.06	0.18	0	2.88	2.7	1.99	2.09678	52.3237	4.64122	8.75619e-14	Up	XP_006432354.1/1.9e-110/hypothetical protein CICLE_v10000784mg [Citrus clementina] >ESR45594.1 hypothetical protein CICLE_v10000784mg [Citrus clementina]	XM_016092740.2/0.0/PREDICTED: Arachis duranensis protein PIN-LIKES 3-like (LOC107473190), transcript variant X1, mRNA	sp|Q9SWH5|FUT1_ARATH/1.7e-92/Galactoside 2-alpha-L-fucosyltransferase OS=Arabidopsis thaliana GN=FUT1 PE=1 SV=2	cit:102607341/1.1e-110/galactoside 2-alpha-L-fucosyltransferase-like; K13681 xyloglucan fucosyltransferase [EC:2.4.1.-]	At2g03220/4.0e-92/[M] LSE0141 A Xyloglucan fucosyltransferase and related glycosyltransferases	PF03254/2.8E-128/Xyloglucan fucosyltransferase	biological_process:GO:0042546//cell wall biogenesis;cellular_component:GO:0016021//integral component of membrane;molecular_function:GO:0008107//galactoside 2-alpha-L-fucosyltransferase activity;
CL1170.Contig5_All	1941	1.56	2.63	2.41	8.69	9.99	9.13	70.8153	312.845	2.14332	1.9669e-33	Up	XP_006432354.1/1.5e-178/hypothetical protein CICLE_v10000784mg [Citrus clementina] >ESR45594.1 hypothetical protein CICLE_v10000784mg [Citrus clementina]	XM_002522428.2/0.0/PREDICTED: Ricinus communis galactoside 2-alpha-L-fucosyltransferase (LOC8281842), mRNA	sp|Q9SWH5|FUT1_ARATH/6.2e-158/Galactoside 2-alpha-L-fucosyltransferase OS=Arabidopsis thaliana GN=FUT1 PE=1 SV=2	cit:102607341/8.3e-179/galactoside 2-alpha-L-fucosyltransferase-like; K13681 xyloglucan fucosyltransferase [EC:2.4.1.-]	At2g03220/1.5e-157/[M] LSE0141 A Xyloglucan fucosyltransferase and related glycosyltransferases	PTHR31889/4.2E-273/--	biological_process:GO:0042546//cell wall biogenesis;cellular_component:GO:0016021//integral component of membrane;molecular_function:GO:0008107//galactoside 2-alpha-L-fucosyltransferase activity;
CL1170.Contig8_All	1158	1.35	1.69	1.87	4.89	4.54	5.28	30.3745	94.9157	1.64378	2.9539e-10	Up	XP_006432354.1/2.3e-110/hypothetical protein CICLE_v10000784mg [Citrus clementina] >ESR45594.1 hypothetical protein CICLE_v10000784mg [Citrus clementina]	XM_022185597.1/0.0/PREDICTED: Helianthus annuus galactoside 2-alpha-L-fucosyltransferase-like (LOC110943866), mRNA	sp|Q9SWH5|FUT1_ARATH/2.2e-89/Galactoside 2-alpha-L-fucosyltransferase OS=Arabidopsis thaliana GN=FUT1 PE=1 SV=2	cit:102607341/4.4e-111/galactoside 2-alpha-L-fucosyltransferase-like; K13681 xyloglucan fucosyltransferase [EC:2.4.1.-]	At2g03220/5.0e-89/[M] LSE0141 A Xyloglucan fucosyltransferase and related glycosyltransferases	PF03254/1.3E-126/Xyloglucan fucosyltransferase	biological_process:GO:0042546//cell wall biogenesis;cellular_component:GO:0016021//integral component of membrane;molecular_function:GO:0008107//galactoside 2-alpha-L-fucosyltransferase activity;
CL1174.Contig1_All	2252	2.82	2.08	2.28	0.66	0.6	0.83	88.5485	27.7505	-1.67395	9.18387e-09	Down	OWZ08008.1/1.6e-197/Transketolase [Phytophthora megakarya]	NA	sp|Q43848|TKTC_SOLTU/5.0e-183/Transketolase, chloroplastic OS=Solanum tuberosum PE=2 SV=1	cann:107870592/4.4e-184/transketolase, chloroplastic; K00615 transketolase [EC:2.2.1.1]	YPR074c/4.2e-241/[G] KOG0523 Transketolase	PS00801/-/Transketolase signature 1.	biological_process:GO:0008152//metabolic process;molecular_function:GO:0046872//metal ion binding;GO:0004802//transketolase activity;
CL1174.Contig2_All	2271	2.47	2.41	2.55	1.09	0.77	0.92	92.5399	36.7184	-1.33357	1.9283e-07	Down	CBN79333.1/2.3e-199/conserved unknown protein [Ectocarpus siliculosus]	NA	sp|Q43848|TKTC_SOLTU/2.5e-182/Transketolase, chloroplastic OS=Solanum tuberosum PE=2 SV=1	cann:107870592/6.5e-183/transketolase, chloroplastic; K00615 transketolase [EC:2.2.1.1]	YPR074c/3.0e-239/[G] KOG0523 Transketolase	PF00456/9.7E-147/Transketolase, thiamine diphosphate binding domain	biological_process:GO:0008152//metabolic process;molecular_function:GO:0046872//metal ion binding;GO:0004802//transketolase activity;
CL1174.Contig3_All	2132	2.77	2.48	2.56	0.68	0.51	1.16	90.9681	29.521	-1.62362	3.72584e-07	Down	GAX09617.1/1.1e-187/transketolase [Fistulifera solaris]	NA	sp|Q43848|TKTC_SOLTU/4.1e-171/Transketolase, chloroplastic OS=Solanum tuberosum PE=2 SV=1	cann:107870592/1.7e-172/transketolase, chloroplastic; K00615 transketolase [EC:2.2.1.1]	YPR074c/8.6e-228/[G] KOG0523 Transketolase	PTHR11624/0.0/--	biological_process:GO:0008152//metabolic process;molecular_function:GO:0046872//metal ion binding;GO:0004802//transketolase activity;
CL1174.Contig4_All	1147	0.7	0.55	0.35	0	0.17	0.15	8.75083	2.23651	-1.96817	0.0317846	Down	OWZ08008.1/1.7e-113/Transketolase [Phytophthora megakarya]	NA	sp|F4IW47|TKTC2_ARATH/5.6e-106/Transketolase-2, chloroplastic OS=Arabidopsis thaliana GN=TKL-2 PE=1 SV=1	cann:107870592/7.2e-106/transketolase, chloroplastic; K00615 transketolase [EC:2.2.1.1]	YPR074c/1.4e-128/[G] KOG0523 Transketolase	PS00801/-/Transketolase signature 1.	biological_process:GO:0008152//metabolic process;molecular_function:GO:0046872//metal ion binding;GO:0004802//transketolase activity;
CL1174.Contig5_All	1066	1.39	1.87	1.64	0.66	0.28	0.78	26.8455	10.2095	-1.39477	0.00889398	Down	CBN79333.1/1.8e-106/conserved unknown protein [Ectocarpus siliculosus]	NA	sp|F4IW47|TKTC2_ARATH/3.7e-96/Transketolase-2, chloroplastic OS=Arabidopsis thaliana GN=TKL-2 PE=1 SV=1	bvg:104888662/3.7e-96/transketolase, chloroplastic; K00615 transketolase [EC:2.2.1.1]	YPR074c/2.4e-114/[G] KOG0523 Transketolase	PS00801/-/Transketolase signature 1.	biological_process:GO:0008152//metabolic process;molecular_function:GO:0046872//metal ion binding;GO:0004802//transketolase activity;
CL1175.Contig3_All	864	1.42	2.23	1.63	4.22	3.98	2.97	23.8523	52.0546	1.1259	0.00229092	Up	GAQ89327.1/2.5e-53/translation initiation factor 1A [Klebsormidium nitens]	NA	sp|P56331|IF1A_ONOVI/7.3e-50/Eukaryotic translation initiation factor 1A OS=Onobrychis viciifolia PE=2 SV=2	csl:COCSUDRAFT_21736/9.1e-53/nucleic acid-binding protein; K03236 translation initiation factor 1A	Hs4503499/4.3e-61/[J] KOG3403 Translation initiation factor 1A (eIF-1A)	NA	molecular_function:GO:0003743//translation initiation factor activity;
CL1175.Contig4_All	907	1.61	1.37	2.2	4.85	5.67	5.53	24.6466	79.7278	1.6937	1.38658e-08	Up	GAQ89327.1/2.6e-53/translation initiation factor 1A [Klebsormidium nitens]	XM_002295818.1/0.0/Thalassiosira pseudonana CCMP1335 predicted protein partial mRNA	sp|P56331|IF1A_ONOVI/7.6e-50/Eukaryotic translation initiation factor 1A OS=Onobrychis viciifolia PE=2 SV=2	csl:COCSUDRAFT_21736/9.5e-53/nucleic acid-binding protein; K03236 translation initiation factor 1A	Hs4503499/4.5e-61/[J] KOG3403 Translation initiation factor 1A (eIF-1A)	NA	molecular_function:GO:0003743//translation initiation factor activity;
CL1177.Contig2_All	1046	1.54	1.18	1.37	0.06	0.48	0.41	21.5741	5.96792	-1.854	0.00341945	Down	XP_001775327.1/1.7e-64/predicted protein [Physcomitrella patens] >EDQ59797.1 predicted protein [Physcomitrella patens]	NA	sp|Q0PGJ6|AKRC9_ARATH/9.8e-49/NADPH-dependent aldo-keto reductase, chloroplastic OS=Arabidopsis thaliana GN=AKR4C9 PE=1 SV=1	bdi:100840746/7.6e-54/NADP-dependent D-sorbitol-6-phosphate dehydrogenase-like; K00011 aldehyde reductase [EC:1.1.1.21]	SPAC2F3.05c/5.6e-55/[R] KOG1577 Aldo/keto reductase family proteins	PF00248/1.4E-46/Aldo/keto reductase family	molecular_function:GO:0016491//oxidoreductase activity;
CL1177.Contig3_All	1044	1.98	1.12	1.27	0.12	0.21	0.27	23.1351	3.69546	-2.64626	3.06821e-05	Down	XP_001775327.1/2.9e-64/predicted protein [Physcomitrella patens] >EDQ59797.1 predicted protein [Physcomitrella patens]	NA	sp|Q0PGJ6|AKRC9_ARATH/6.8e-50/NADPH-dependent aldo-keto reductase, chloroplastic OS=Arabidopsis thaliana GN=AKR4C9 PE=1 SV=1	bdi:100840746/5.8e-54/NADP-dependent D-sorbitol-6-phosphate dehydrogenase-like; K00011 aldehyde reductase [EC:1.1.1.21]	SPAC2F3.05c/7.3e-55/[R] KOG1577 Aldo/keto reductase family proteins	PS00798/-/Aldo/keto reductase family signature 1.	molecular_function:GO:0016491//oxidoreductase activity;
CL1177.Contig4_All	368	1.22	1.16	0.79	0	0.22	0	4.59621	0.878216	-2.3878	0.0268728	Down	NA	NA	NA	NA	NA	NA	NA
CL1177.Contig5_All	1258	9.73	8.86	8.91	2.77	2.23	3.77	184.909	63.0602	-1.55201	2.23306e-13	Down	GAQ91342.1/1.3e-58/Aldo/keto reductase family protein [Klebsormidium nitens]	NA	sp|Q0PGJ6|AKRC9_ARATH/8.1e-50/NADPH-dependent aldo-keto reductase, chloroplastic OS=Arabidopsis thaliana GN=AKR4C9 PE=1 SV=1	cre:CHLREDRAFT_158244/1.1e-54/LCI28; low CO2-induced aldose reductase; K00002 alcohol dehydrogenase (NADP+) [EC:1.1.1.2]	7294702/2.7e-51/[R] KOG1577 Aldo/keto reductase family proteins	PF00248/1.0E-46/Aldo/keto reductase family	molecular_function:GO:0016491//oxidoreductase activity;
CL1183.Contig5_All	2184	0	0	0	0.17	0.07	0.06	0.535683	2.84437	2.40865	0.0379936	Up	KDO52525.1/1.5e-176/hypothetical protein CISIN_1g012679mg [Citrus sinensis]	XM_008374882.2/0.0/PREDICTED: Malus x domestica cell division cycle 20.1, cofactor of APC complex-like (LOC103436456), mRNA	sp|Q9SZA4|CDC21_ARATH/3.1e-166/Cell division cycle 20.1, cofactor of APC complex OS=Arabidopsis thaliana GN=CDC20-1 PE=1 SV=1	cit:102608283/8.7e-177/cell division cycle 20.2, cofactor of APC complex-like; K03363 cell division cycle 20, cofactor of APC complex	At4g33270/7.4e-166/[DO] KOG0305 Anaphase promoting complex, Cdc20, Cdh1, and Ama1 subunits	PS50294/31.824/Trp-Asp (WD) repeats circular profile.	biological_process:GO:1904668//positive regulation of ubiquitin protein ligase activity;molecular_function:GO:0097027//ubiquitin-protein transferase activator activity;GO:0010997//anaphase-promoting complex binding;
CL1185.Contig1_All	589	4.69	5.21	3.83	0.87	1.38	1.58	39.6038	11.606	-1.77077	5.09015e-05	Down	AFK36267.1/9.2e-68/unknown [Medicago truncatula]	BT129991.1/0.0/Oryza sativa clone RRlibD00237 mRNA sequence	sp|P46297|RS23_FRAAN/1.4e-57/40S ribosomal protein S23 OS=Fragaria ananassa GN=RPS23 PE=2 SV=1	thj:104799358/3.5e-56/40S ribosomal protein S23; K02973 small subunit ribosomal protein S23e	SPBP4H10.13/3.3e-68/[J] KOG1749 40S ribosomal protein S23	NA	biological_process:GO:0006412//translation;cellular_component:GO:0015935//small ribosomal subunit;molecular_function:GO:0003735//structural constituent of ribosome;
CL1185.Contig3_All	661	3.39	3.53	3.73	1.04	0.68	0.77	34.858	8.92054	-1.96629	1.25203e-05	Down	AFK36267.1/7.4e-74/unknown [Medicago truncatula]	BT129991.1/0.0/Oryza sativa clone RRlibD00237 mRNA sequence	sp|P46297|RS23_FRAAN/1.6e-60/40S ribosomal protein S23 OS=Fragaria ananassa GN=RPS23 PE=2 SV=1	thj:104809897/1.7e-59/40S ribosomal protein S23; K02973 small subunit ribosomal protein S23e	YPR132w/2.4e-72/[J] KOG1749 40S ribosomal protein S23	NA	biological_process:GO:0006412//translation;cellular_component:GO:0015935//small ribosomal subunit;molecular_function:GO:0003735//structural constituent of ribosome;
CL1185.Contig4_All	843	14.88	13.61	12.89	3.2	2.35	2.74	181.072	38.5832	-2.23052	1.70122e-26	Down	AFK36267.1/4.4e-71/unknown [Medicago truncatula]	BT129991.1/0.0/Oryza sativa clone RRlibD00237 mRNA sequence	sp|P46297|RS23_FRAAN/6.4e-59/40S ribosomal protein S23 OS=Fragaria ananassa GN=RPS23 PE=2 SV=1	thj:104799358/1.6e-57/40S ribosomal protein S23; K02973 small subunit ribosomal protein S23e	YPR132w/2.6e-71/[J] KOG1749 40S ribosomal protein S23	NA	biological_process:GO:0006412//translation;cellular_component:GO:0015935//small ribosomal subunit;molecular_function:GO:0003735//structural constituent of ribosome;
CL1187.Contig3_All	1370	1.86	1.42	1.43	0.44	0.47	0.38	34.2504	10.5649	-1.69684	0.000160614	Down	XP_009146934.1/1.8e-18/PREDICTED: uncharacterized protein LOC103870549 [Brassica rapa]	NA	NA	boe:106343202/2.7e-19/hsp70 nucleotide exchange factor fes1-like; K09562 hsp70-interacting protein	YBR101c/5.1e-24/[O] KOG2160 Armadillo/beta-catenin-like repeat-containing protein	PTHR19316:SF22/3.1E-65/--	NA
CL1188.Contig1_All	2011	0.25	0.54	0.47	1.83	2.81	2.25	13.9388	79.4013	2.51006	7.5474e-12	Up	XP_007018475.1/3.5e-58/PREDICTED: uncharacterized protein LOC18591964 [Theobroma cacao] >EOY15700.1 Uncharacterized protein TCM_034686 [Theobroma cacao]	XM_006493358.2/0.0/PREDICTED: Citrus sinensis probable ribosome biogenesis protein RLP24 (LOC102610147), mRNA	sp|O22165|RLP24_ARATH/2.6e-13/Probable ribosome biogenesis protein RLP24 OS=Arabidopsis thaliana GN=At2g44860 PE=1 SV=1	aly:ARALYDRAFT_313471/6.4e-41/F17L21.26; K14548 U3 small nucleolar RNA-associated protein 4	At1g27470/6.1e-42/[R] KOG2048 WD40 repeat protein	PTHR33595:SF1/1.5E-61/--	NA
CL1189.Contig1_All	893	2.6	2.52	2.85	10.8	11.63	11.46	37.8296	166.713	2.13978	9.79637e-26	Up	XP_012089492.2/2.3e-78/germin-like protein subfamily 1 member 16 [Jatropha curcas]	XM_010026609.2/0.0/PREDICTED: Eucalyptus grandis germin-like protein subfamily 1 member 7 (LOC104415326), mRNA	sp|P92997|GL113_ARATH/5.7e-74/Germin-like protein subfamily 1 member 13 OS=Arabidopsis thaliana GN=GLP6 PE=2 SV=2	vvi:109124153/7.8e-07/thioredoxin reductase 1-like; K00384 thioredoxin reductase (NADPH) [EC:1.8.1.9]	At5g39130/3.0e-73/[V] LSE0346 A Germin/oxalate oxidase	SM00835/1.2E-28/Cupin	cellular_component:GO:0005618//cell wall;GO:0005576//extracellular region;molecular_function:GO:0045735//nutrient reservoir activity;GO:0030145//manganese ion binding;
CL1189.Contig2_All	1056	1.71	1.02	1.45	5.19	5.3	5.05	24.0347	91.5135	1.92887	7.75953e-12	Up	XP_012089492.2/1.0e-72/germin-like protein subfamily 1 member 16 [Jatropha curcas]	NA	sp|Q9FIC8|GL116_ARATH/4.2e-68/Germin-like protein subfamily 1 member 16 OS=Arabidopsis thaliana GN=At5g39130 PE=2 SV=1	vvi:109124153/1.9e-07/thioredoxin reductase 1-like; K00384 thioredoxin reductase (NADPH) [EC:1.8.1.9]	At5g39130/9.9e-68/[V] LSE0346 A Germin/oxalate oxidase	PF00190/1.2E-38/Cupin	cellular_component:GO:0005618//cell wall;GO:0005576//extracellular region;molecular_function:GO:0045735//nutrient reservoir activity;GO:0030145//manganese ion binding;
CL1192.Contig1_All	1670	0.08	0	0.34	1.29	1.82	1.03	4.58824	38.2735	3.06033	1.78166e-06	Up	NA	AB639912.1/0.0/Acer pseudosieboldianum DNA, complete sequence, microsatellite: AQHPK	NA	NA	NA	NA	NA
CL1192.Contig5_All	622	0.41	0.31	0.31	1.45	2.03	0.71	3.76444	13.2397	1.81436	0.0181512	Up	NA	NA	NA	NA	NA	NA	NA
CL12.Contig2_All	1279	1.12	1.3	1.22	0.47	0.6	0.37	24.7118	10.7746	-1.19757	0.0207623	Down	ADB81954.1/1.7e-74/delta 12 desaturase [Lobosphaera incisa]	NA	sp|A3F5L3|DES2_SORBI/2.6e-72/Fatty acid desaturase DES2 OS=Sorghum bicolor GN=DES2 PE=2 SV=1	cre:CHLREDRAFT_135825/1.6e-74/fatty acid desaturase, delta-12; K10256 omega-6 fatty acid desaturase / acyl-lipid omega-6 desaturase (Delta-12 desaturase) [EC:1.14.19.6 1.14.19.22]	At3g12120/3.7e-69/[I] TWOG0155 Oleate desaturase/linoleate desaturase	PF00487/1.1E-23/Fatty acid desaturase	biological_process:GO:0006629//lipid metabolic process;cellular_component:GO:0016021//integral component of membrane;molecular_function:GO:0016717//oxidoreductase activity, acting on paired donors, with oxidation of a pair of donors resulting in the reduction of molecular oxygen to two molecules of water;
CL12.Contig3_All	1193	1.5	1.35	1.32	0.3	0.59	0.25	26.1776	8.23067	-1.66925	0.00173883	Down	AGZ02022.1/1.4e-43/microsomal omega-6-desaturase [Millettia pinnata]	NA	sp|Q39287|FAD6E_BRAJU/1.2e-42/Omega-6 fatty acid desaturase, endoplasmic reticulum OS=Brassica juncea PE=2 SV=1	vcn:VOLCADRAFT_66373/1.3e-44/fatty acid desaturase, delta-12; K10256 omega-6 fatty acid desaturase / acyl-lipid omega-6 desaturase (Delta-12 desaturase) [EC:1.14.19.6 1.14.19.22]	Hs4505285/6.5e-15/[WV] KOG1216 von Willebrand factor and related coagulation proteins	NA	biological_process:GO:0006629//lipid metabolic process;cellular_component:GO:0016021//integral component of membrane;molecular_function:GO:0045485//omega-6 fatty acid desaturase activity;GO:0016717//oxidoreductase activity, acting on paired donors, with oxidation of a pair of donors resulting in the reduction of molecular oxygen to two molecules of water;
CL12.Contig8_All	1768	2.08	1.75	1.4	0.17	0.2	0.26	50.0902	7.0713	-2.82448	3.22349e-10	Down	OSX80488.1/1.9e-87/hypothetical protein BU14_0051s0008 [Porphyra umbilicalis]	NA	sp|A3F5L3|DES2_SORBI/8.7e-82/Fatty acid desaturase DES2 OS=Sorghum bicolor GN=DES2 PE=2 SV=1	ccp:CHC_T00008296001/7.0e-84/delta12 fatty acid desaturase; K10256 omega-6 fatty acid desaturase / acyl-lipid omega-6 desaturase (Delta-12 desaturase) [EC:1.14.19.6 1.14.19.22]	At3g12120/1.2e-78/[I] TWOG0155 Oleate desaturase/linoleate desaturase	PTHR32100:SF0/2.8E-227/--	NA
CL120.Contig1_All	432	0.79	0.78	1.28	3.03	3.27	3.11	6.24084	19.704	1.65868	0.00439102	Up	XP_018853363.1/9.7e-06/PREDICTED: uncharacterized protein LOC109015344, partial [Juglans regia]	NA	NA	NA	NA	NA	NA
CL120.Contig2_All	3091	5.25	4.74	5.06	14.03	15.14	15.04	260.585	806.853	1.63055	7.44851e-81	Up	XP_006444547.1/2.3e-226/hypothetical protein CICLE_v10019205mg [Citrus clementina] >ESR57787.1 hypothetical protein CICLE_v10019205mg [Citrus clementina]	XM_006492306.2/0.0/PREDICTED: Citrus sinensis long chain acyl-CoA synthetase 1 (LOC102614799), mRNA	sp|O22898|LACS1_ARATH/1.3e-194/Long chain acyl-CoA synthetase 1 OS=Arabidopsis thaliana GN=LACS1 PE=2 SV=1	cit:102614799/9.9e-227/long chain acyl-CoA synthetase 1; K01897 long-chain acyl-CoA synthetase [EC:6.2.1.3]	At2g47240/3.1e-194/[I] KOG1256 Long-chain acyl-CoA synthetases (AMP-forming)	PF00501/2.6E-73/AMP-binding enzyme	biological_process:GO:0008152//metabolic process;molecular_function:GO:0003824//catalytic activity;
CL1205.Contig3_All	657	5.07	4.46	4.86	0.94	0.52	0.67	46.6611	7.68571	-2.60197	1.94914e-09	Down	XP_006652265.1/3.9e-67/PREDICTED: 40S ribosomal protein S14-like [Oryza brachyantha]	CU406185.1/0.0/Oryza rufipogon (W1943) cDNA clone: ORW1943C108M24, full insert sequence	sp|P46295|RS14_CHLRE/5.9e-68/40S ribosomal protein S14 OS=Chlamydomonas reinhardtii GN=RPS14 PE=3 SV=1	obr:102702838/5.8e-68/40S ribosomal protein S14-like; K02955 small subunit ribosomal protein S14e	Hs5032051/3.1e-67/[J] KOG0407 40S ribosomal protein S14	NA	biological_process:GO:0006412//translation;cellular_component:GO:0005840//ribosome;molecular_function:GO:0003735//structural constituent of ribosome;
CL1205.Contig5_All	743	5.07	5.4	5.6	0.99	1.22	0.97	60.1994	12.6558	-2.24995	2.42814e-10	Down	XP_006652265.1/2.9e-66/PREDICTED: 40S ribosomal protein S14-like [Oryza brachyantha]	CU406185.1/0.0/Oryza rufipogon (W1943) cDNA clone: ORW1943C108M24, full insert sequence	sp|P46295|RS14_CHLRE/4.3e-67/40S ribosomal protein S14 OS=Chlamydomonas reinhardtii GN=RPS14 PE=3 SV=1	obr:102702838/4.3e-67/40S ribosomal protein S14-like; K02955 small subunit ribosomal protein S14e	Hs5032051/2.3e-66/[J] KOG0407 40S ribosomal protein S14	NA	biological_process:GO:0000462//maturation of SSU-rRNA from tricistronic rRNA transcript (SSU-rRNA, 5.8S rRNA, LSU-rRNA);GO:0000028//ribosomal small subunit assembly;GO:0006412//translation;cellular_component:GO:0005840//ribosome;GO:0022627//cytosolic small ribosomal subunit;molecular_function:GO:0048027//mRNA 5'-UTR binding;GO:0070181//small ribosomal subunit rRNA binding;GO:0003735//structural c…
CL1205.Contig6_All	726	10.58	10.7	8.91	1.83	1.79	2.04	111.884	22.7631	-2.29723	7.78121e-18	Down	XP_013898791.1/1.5e-67/40S ribosomal protein S14-3 [Monoraphidium neglectum] >KIY99771.1 40S ribosomal protein S14-3 [Monoraphidium neglectum]	CU406185.1/0.0/Oryza rufipogon (W1943) cDNA clone: ORW1943C108M24, full insert sequence	sp|P46295|RS14_CHLRE/7.9e-66/40S ribosomal protein S14 OS=Chlamydomonas reinhardtii GN=RPS14 PE=3 SV=1	mng:MNEG_8191/2.2e-68/40S ribosomal protein S14-3; K02955 small subunit ribosomal protein S14e	7290855/1.1e-65/[J] KOG0407 40S ribosomal protein S14	NA	biological_process:GO:0006412//translation;cellular_component:GO:0005840//ribosome;molecular_function:GO:0003735//structural constituent of ribosome;
CL1211.Contig1_All	592	9.32	9.35	11.87	1.35	2.76	2.41	88.7259	20.467	-2.11606	3.08664e-11	Down	XP_005841054.1/2.6e-33/large subunit ribosomal protein L37Ae, cytoplasmic [Guillardia theta CCMP2712] >EKX54074.1 large subunit ribosomal protein L37Ae, cytoplasmic [Guillardia theta CCMP2712]	XM_019389295.1/0.0/PREDICTED: Nicotiana attenuata 60S ribosomal protein L37a (LOC109224773), mRNA	sp|Q9ZRS8|RL37A_PSEMZ/1.1e-33/60S ribosomal protein L37a OS=Pseudotsuga menziesii GN=RPL37A PE=3 SV=1	csl:COCSUDRAFT_33375/1.9e-33/60S ribosomal protein L37a; K02921 large subunit ribosomal protein L37Ae	YPR043w/9.6e-36/[J] KOG0402 60S ribosomal protein L37	NA	biological_process:GO:0006412//translation;cellular_component:GO:0005840//ribosome;molecular_function:GO:0003735//structural constituent of ribosome;
CL1211.Contig2_All	601	18.97	16.65	17.66	3.1	2.45	3.94	159.5	30.2016	-2.40086	8.02373e-25	Down	XP_005841054.1/2.6e-33/large subunit ribosomal protein L37Ae, cytoplasmic [Guillardia theta CCMP2712] >EKX54074.1 large subunit ribosomal protein L37Ae, cytoplasmic [Guillardia theta CCMP2712]	XM_019389295.1/0.0/PREDICTED: Nicotiana attenuata 60S ribosomal protein L37a (LOC109224773), mRNA	sp|Q9ZRS8|RL37A_PSEMZ/1.1e-33/60S ribosomal protein L37a OS=Pseudotsuga menziesii GN=RPL37A PE=3 SV=1	csl:COCSUDRAFT_33375/1.9e-33/60S ribosomal protein L37a; K02921 large subunit ribosomal protein L37Ae	YPR043w/9.8e-36/[J] KOG0402 60S ribosomal protein L37	NA	biological_process:GO:0006412//translation;cellular_component:GO:0005840//ribosome;molecular_function:GO:0003735//structural constituent of ribosome;
CL1213.Contig1_All	1228	1.88	2.17	1.43	0.15	0.19	0.57	34.8881	7.11377	-2.29405	2.31144e-05	Down	AAQ75384.1/1.0e-105/putative opsin [Oryza sativa Indica Group]	NA	NA	atr:18436108/9.7e-08/nuclear pore complex protein NUP62 isoform X1; K14306 nuclear pore complex protein Nup62	SPAPB1E7.04c/1.4e-09/[M] KOG4701 Chitinase	PTHR28286/6.1E-91/--	cellular_component:GO:0016021//integral component of membrane;molecular_function:GO:0005216//ion channel activity;
CL1214.Contig5_All	4409	0.73	0.44	1.18	1.32	1.85	1.51	58.5521	121.639	1.05481	0.00426344	Up	XP_021597067.1/0.0e+00/calcium permeable stress-gated cation channel 1-like [Manihot esculenta] >XP_021597068.1 calcium permeable stress-gated cation channel 1-like [Manihot esculenta] >OAY25883.1 hypothetical protein MANES_16G003300 [Manihot esculenta]	XM_006467325.2/0.0/PREDICTED: Citrus sinensis hypothetical protein (LOC102618085), mRNA	sp|Q5XEZ5|CSC1_ARATH/0.0e+00/Calcium permeable stress-gated cation channel 1 OS=Arabidopsis thaliana GN=CSC1 PE=2 SV=1	jcu:105650086/0.0e+00/calcium permeable stress-gated cation channel 1; K21989 calcium permeable stress-gated cation channel	At4g04340/0.0e+00/[R] KOG1134 Uncharacterized conserved protein	PF14703/4.2E-16/Cytosolic domain of 10TM putative phosphate transporter	cellular_component:GO:0016021//integral component of membrane;
CL1215.Contig9_All	1478	0.65	0.82	0.32	1.93	0.85	1.51	14.4323	35.0489	1.28006	0.0231554	Up	GAV89662.1/1.3e-65/zf-RanBP domain-containing protein [Cephalotus follicularis]	NA	sp|Q8S9K3|VAR3_ARATH/6.7e-19/Zinc finger protein VAR3, chloroplastic OS=Arabidopsis thaliana GN=VAR3 PE=1 SV=2	tcc:18600364/3.8e-35/DNA polymerase zeta catalytic subunit; K02350 DNA polymerase zeta [EC:2.7.7.7]	At1g48570/2.4e-59/[R] KOG4198 RNA-binding Ran Zn-finger protein and related proteins	PTHR23111/4.1E-76/--	NA
CL1219.Contig1_All	2847	0.43	0.34	1.02	5.48	5.45	6.14	29.4657	284.341	3.27051	1.55689e-29	Up	OLQ09981.1/5.6e-110/Trophinin [Symbiodinium microadriaticum]	XM_021420706.1/0.0/PREDICTED: Herrania umbratica uncharacterized LOC110410822 (LOC110410822), mRNA	sp|Q8L7F7|NUP62_ARATH/3.2e-33/Nuclear pore complex protein NUP62 OS=Arabidopsis thaliana GN=NUP62 PE=1 SV=1	nnu:104598469/2.0e-40/nuclear pore complex protein NUP62; K14306 nuclear pore complex protein Nup62	Hs22056571/2.3e-79/[S] LSE0569 H Uncharacterized protein	NA	biological_process:GO:0006508//proteolysis;GO:0016539//intein-mediated protein splicing;cellular_component:GO:0005576//extracellular region;GO:0016021//integral component of membrane;molecular_function:GO:0008233//peptidase activity;
CL1219.Contig2_All	2565	2.13	2.38	2.07	22.57	23.71	21.99	94.5501	1028.21	3.44291	1.23956e-228	Up	OLQ09981.1/1.9e-117/Trophinin [Symbiodinium microadriaticum]	NA	sp|Q8L7F7|NUP62_ARATH/5.6e-29/Nuclear pore complex protein NUP62 OS=Arabidopsis thaliana GN=NUP62 PE=1 SV=1	nnu:104598469/3.1e-40/nuclear pore complex protein NUP62; K14306 nuclear pore complex protein Nup62	Hs4505285/5.4e-91/[WV] KOG1216 von Willebrand factor and related coagulation proteins	NA	biological_process:GO:0006508//proteolysis;GO:0016539//intein-mediated protein splicing;cellular_component:GO:0005576//extracellular region;GO:0016021//integral component of membrane;molecular_function:GO:0008233//peptidase activity;
CL1219.Contig3_All	2899	1.39	1.73	1.85	7.41	7.17	6.95	80.6322	366.678	2.18509	2.36097e-53	Up	OLQ09981.1/9.4e-113/Trophinin [Symbiodinium microadriaticum]	XM_021420706.1/0.0/PREDICTED: Herrania umbratica uncharacterized LOC110410822 (LOC110410822), mRNA	sp|Q8L7F7|NUP62_ARATH/4.8e-29/Nuclear pore complex protein NUP62 OS=Arabidopsis thaliana GN=NUP62 PE=1 SV=1	nnu:104598469/6.0e-40/nuclear pore complex protein NUP62; K14306 nuclear pore complex protein Nup62	Hs4505285/1.3e-77/[WV] KOG1216 von Willebrand factor and related coagulation proteins	NA	biological_process:GO:0006508//proteolysis;cellular_component:GO:0005576//extracellular region;
CL1219.Contig4_All	2926	0	0	0.07	3.83	3.57	4.79	1.95929	209.154	6.73809	5.43595e-32	Up	OLQ09981.1/5.7e-118/Trophinin [Symbiodinium microadriaticum]	XM_004504227.2/0.0/PREDICTED: Cicer arietinum uncharacterized LOC101494080 (LOC101494080), mRNA	sp|Q8L7F7|NUP62_ARATH/7.5e-30/Nuclear pore complex protein NUP62 OS=Arabidopsis thaliana GN=NUP62 PE=1 SV=1	lang:109360846/3.8e-42/nuclear pore complex protein NUP62; K14306 nuclear pore complex protein Nup62	Hs4505285/8.5e-93/[WV] KOG1216 von Willebrand factor and related coagulation proteins	PTHR21523/9.8E-12/--	biological_process:GO:0006508//proteolysis;GO:0016539//intein-mediated protein splicing;cellular_component:GO:0005576//extracellular region;GO:0016021//integral component of membrane;molecular_function:GO:0008233//peptidase activity;
CL1219.Contig5_All	3259	0.45	1.04	0.31	1.72	2.34	2.42	33.7643	123.349	1.86917	2.19827e-06	Up	OLQ09981.1/8.3e-118/Trophinin [Symbiodinium microadriaticum]	XM_021420706.1/0.0/PREDICTED: Herrania umbratica uncharacterized LOC110410822 (LOC110410822), mRNA	sp|Q8L7F7|NUP62_ARATH/3.2e-29/Nuclear pore complex protein NUP62 OS=Arabidopsis thaliana GN=NUP62 PE=1 SV=1	nnu:104598469/8.8e-40/nuclear pore complex protein NUP62; K14306 nuclear pore complex protein Nup62	Hs4505285/4.3e-93/[WV] KOG1216 von Willebrand factor and related coagulation proteins	NA	biological_process:GO:0006508//proteolysis;cellular_component:GO:0005576//extracellular region;
CL1219.Contig6_All	3751	1.72	1.69	1.6	16.75	17.87	16.88	105.8	1145.32	3.43634	7.24053e-257	Up	OLQ09981.1/7.1e-129/Trophinin [Symbiodinium microadriaticum]	AP009747.1/0.0/Lotus japonicus genomic DNA, clone: LjT40A21, TM1883, complete sequence	sp|Q8L7F7|NUP62_ARATH/6.2e-37/Nuclear pore complex protein NUP62 OS=Arabidopsis thaliana GN=NUP62 PE=1 SV=1	nnu:104598469/3.6e-45/nuclear pore complex protein NUP62; K14306 nuclear pore complex protein Nup62	Hs22056571/3.4e-110/[S] LSE0569 H Uncharacterized protein	NA	NA
CL1222.Contig1_All	489	3.69	2.69	2.3	0.82	0.83	0.14	19.3229	4.99941	-1.95048	0.00358353	Down	XP_001751275.1/1.8e-53/predicted protein [Physcomitrella patens] >XP_001760230.1 predicted protein [Physcomitrella patens] >XP_001769540.1 predicted protein [Physcomitrella patens] >XP_001784842.1 predicted protein [Physcomitrella patens] >EDQ50352.1 predicted protein [Physcomitrella patens] >EDQ65701.1 predicted protein [Physcomitrella patens] >EDQ74986.1 predicted protein [Physcomitrella patens…	XM_001700604.1/0.0/Chlamydomonas reinhardtii ribosomal protein S15a (RPS15a), mRNA	sp|Q9AT34|RS15A_DAUCA/3.2e-55/40S ribosomal protein S15a OS=Daucus carota GN=RPS15A PE=2 SV=3	ppp:PHYPADRAFT_110864/2.7e-54/hypothetical protein; K02957 small subunit ribosomal protein S15Ae	YJL190c/4.5e-55/[J] KOG1754 40S ribosomal protein S15/S22	NA	biological_process:GO:0006412//translation;cellular_component:GO:0005840//ribosome;GO:0022627//cytosolic small ribosomal subunit;molecular_function:GO:0003735//structural constituent of ribosome;
CL1222.Contig3_All	609	9.34	9.29	8.63	2.87	1.77	1.76	82.7117	21.0915	-1.97143	8.52233e-11	Down	CBI31713.3/9.2e-55/unnamed protein product, partial [Vitis vinifera]	XM_001700604.1/0.0/Chlamydomonas reinhardtii ribosomal protein S15a (RPS15a), mRNA	sp|Q9AT34|RS15A_DAUCA/2.0e-54/40S ribosomal protein S15a OS=Daucus carota GN=RPS15A PE=2 SV=3	zma:100217251/2.6e-54/pco072913; 40S ribosomal protein S15a; K02957 small subunit ribosomal protein S15Ae	YJL190c/1.7e-56/[J] KOG1754 40S ribosomal protein S15/S22	NA	biological_process:GO:0006412//translation;cellular_component:GO:0005840//ribosome;molecular_function:GO:0003735//structural constituent of ribosome;
CL1222.Contig4_All	614	13.28	10.46	10.47	1.89	2.65	3.38	104.492	25.812	-2.01728	1.89487e-12	Down	CBI31713.3/5.5e-55/unnamed protein product, partial [Vitis vinifera]	XM_001700604.1/0.0/Chlamydomonas reinhardtii ribosomal protein S15a (RPS15a), mRNA	sp|Q9AT34|RS15A_DAUCA/9.1e-55/40S ribosomal protein S15a OS=Daucus carota GN=RPS15A PE=2 SV=3	han:110936430/2.0e-54/40S ribosomal protein S15a-like; K02957 small subunit ribosomal protein S15Ae	YJL190c/1.2e-57/[J] KOG1754 40S ribosomal protein S15/S22	NA	biological_process:GO:0006412//translation;cellular_component:GO:0022627//cytosolic small ribosomal subunit;molecular_function:GO:0003735//structural constituent of ribosome;
CL1222.Contig5_All	326	2.23	1.77	0.68	0	0.22	0	6.10961	0.968546	-2.65719	0.0102164	Down	XP_021716205.1/5.7e-43/40S ribosomal protein S15a-1-like [Chenopodium quinoa] >XP_021720919.1 40S ribosomal protein S15a-1-like [Chenopodium quinoa]	XM_001700604.1/0.0/Chlamydomonas reinhardtii ribosomal protein S15a (RPS15a), mRNA	sp|Q9LX88|R15A4_ARATH/5.9e-45/40S ribosomal protein S15a-4 OS=Arabidopsis thaliana GN=RPS15AD PE=2 SV=3	vvi:100258124/1.1e-43/40S ribosomal protein S15a; K02957 small subunit ribosomal protein S15Ae	YJL190c/1.7e-47/[J] KOG1754 40S ribosomal protein S15/S22	PS00053/-/Ribosomal protein S8 signature.	biological_process:GO:0006412//translation;cellular_component:GO:0005840//ribosome;GO:0022627//cytosolic small ribosomal subunit;molecular_function:GO:0003735//structural constituent of ribosome;
CL1223.Contig12_All	3045	0	0	0	0.59	0.22	0.08	0.919059	14.6608	3.99567	3.23741e-05	Up	XP_006428849.1/8.9e-231/hypothetical protein CICLE_v10013515mg [Citrus clementina] >ESR42089.1 hypothetical protein CICLE_v10013515mg [Citrus clementina]	XM_017753662.1/0.0/PREDICTED: Gossypium arboreum probable leucine-rich repeat receptor-like protein kinase At1g35710 (LOC108455048), mRNA	sp|Q8VZG8|MIK2_ARATH/9.9e-126/MDIS1-interacting receptor like kinase 2 OS=Arabidopsis thaliana GN=MIK2 PE=1 SV=3	han:110929858/1.2e-152/systemin receptor SR160-like; K13415 protein brassinosteroid insensitive 1 [EC:2.7.10.1 2.7.11.1]	At4g08850/5.2e-125/[T] LSE0002 A Receptor protein kinase containing LRR repeats	PF13855/1.1E-6/Leucine rich repeat	cellular_component:GO:0016021//integral component of membrane;molecular_function:GO:0005524//ATP binding;GO:0004672//protein kinase activity;
CL1223.Contig24_All	2585	0.31	0.22	0.19	0.07	0	0	9.01019	1.32045	-2.77053	0.00272023	Down	XP_006428844.1/1.8e-86/hypothetical protein CICLE_v10011222mg [Citrus clementina] >ESR42084.1 hypothetical protein CICLE_v10011222mg [Citrus clementina]	NA	sp|Q9LP24|Y1571_ARATH/2.6e-58/Probable leucine-rich repeat receptor-like protein kinase At1g35710 OS=Arabidopsis thaliana GN=At1g35710 PE=2 SV=1	sly:101263667/3.0e-59/LRR receptor-like serine/threonine-protein kinase FLS2; K13420 LRR receptor-like serine/threonine-protein kinase FLS2 [EC:2.7.11.1]	At1g35710/6.0e-58/[T] LSE0002 A Receptor protein kinase containing LRR repeats	PTHR27000/7.2E-121/--	cellular_component:GO:0016021//integral component of membrane;molecular_function:GO:0005524//ATP binding;GO:0004672//protein kinase activity;
CL1223.Contig27_All	2950	1.1	1.76	1.51	0.76	0.32	0.58	70.6767	28.9176	-1.28929	0.000878296	Down	XP_015386577.1/1.6e-192/PREDICTED: probable LRR receptor-like serine/threonine-protein kinase At4g08850 [Citrus sinensis]	XM_006475850.2/0.0/PREDICTED: Citrus sinensis probable leucine-rich repeat receptor-like protein kinase At1g35710 (LOC102622260), transcript variant X4, mRNA	sp|Q8VZG8|MIK2_ARATH/9.3e-113/MDIS1-interacting receptor like kinase 2 OS=Arabidopsis thaliana GN=MIK2 PE=1 SV=3	han:110929858/2.1e-125/systemin receptor SR160-like; K13415 protein brassinosteroid insensitive 1 [EC:2.7.10.1 2.7.11.1]	At4g08850/4.8e-112/[T] LSE0002 A Receptor protein kinase containing LRR repeats	PTHR27000/8.3E-257/--	cellular_component:GO:0016021//integral component of membrane;molecular_function:GO:0005524//ATP binding;GO:0004672//protein kinase activity;
CL1223.Contig30_All	4495	0.21	0.35	0.18	0	0	0.1	17.1723	3.77482	-2.18561	0.0162273	Down	XP_016675289.1/2.8e-273/PREDICTED: probable leucine-rich repeat receptor-like protein kinase At1g35710 [Gossypium hirsutum]	XM_017753662.1/0.0/PREDICTED: Gossypium arboreum probable leucine-rich repeat receptor-like protein kinase At1g35710 (LOC108455048), mRNA	sp|Q9LP24|Y1571_ARATH/2.7e-204/Probable leucine-rich repeat receptor-like protein kinase At1g35710 OS=Arabidopsis thaliana GN=At1g35710 PE=2 SV=1	han:110929858/4.0e-176/systemin receptor SR160-like; K13415 protein brassinosteroid insensitive 1 [EC:2.7.10.1 2.7.11.1]	At1g35710/6.3e-204/[T] LSE0002 A Receptor protein kinase containing LRR repeats	PTHR27000:SF64/0.0/--	cellular_component:GO:0016021//integral component of membrane;molecular_function:GO:0005524//ATP binding;GO:0004672//protein kinase activity;
CL1225.Contig1_All	752	0.12	0.21	0	0.99	1.57	0.6	1.65169	11.7377	2.82914	0.00108103	Up	XP_005535797.1/9.7e-38/3-hydroxyanthranilate 3,4-dioxygenase [Cyanidioschyzon merolae strain 10D] >BAM79511.1 3-hydroxyanthranilate 3,4-dioxygenase [Cyanidioschyzon merolae strain 10D]	NA	NA	cme:CYME_CMF152C/1.4e-38/3-hydroxyanthranilate 3,4-dioxygenase; K00452 3-hydroxyanthranilate 3,4-dioxygenase [EC:1.13.11.6]	YJR025c/4.0e-55/[E] KOG3995 3-hydroxyanthranilate oxygenase HAAO	PF06052/1.9E-53/3-hydroxyanthranilic acid dioxygenase	biological_process:GO:0043420//anthranilate metabolic process;GO:0034354//'de novo' NAD biosynthetic process from tryptophan;GO:0006569//tryptophan catabolic process;GO:0019805//quinolinate biosynthetic process;cellular_component:GO:0005737//cytoplasm;molecular_function:GO:0000334//3-hydroxyanthranilate 3,4-dioxygenase activity;GO:0005506//iron ion binding;GO:0008198//ferrous iron binding;
CL1225.Contig2_All	775	0.45	0.2	0.41	1.07	2.51	1.87	4.53136	21.7817	2.2651	0.000458701	Up	XP_005535797.1/1.0e-37/3-hydroxyanthranilate 3,4-dioxygenase [Cyanidioschyzon merolae strain 10D] >BAM79511.1 3-hydroxyanthranilate 3,4-dioxygenase [Cyanidioschyzon merolae strain 10D]	NA	NA	cme:CYME_CMF152C/1.5e-38/3-hydroxyanthranilate 3,4-dioxygenase; K00452 3-hydroxyanthranilate 3,4-dioxygenase [EC:1.13.11.6]	YJR025c/4.1e-55/[E] KOG3995 3-hydroxyanthranilate oxygenase HAAO	PF06052/2.1E-53/3-hydroxyanthranilic acid dioxygenase	biological_process:GO:0043420//anthranilate metabolic process;GO:0034354//'de novo' NAD biosynthetic process from tryptophan;GO:0006569//tryptophan catabolic process;GO:0019805//quinolinate biosynthetic process;cellular_component:GO:0005737//cytoplasm;molecular_function:GO:0000334//3-hydroxyanthranilate 3,4-dioxygenase activity;GO:0005506//iron ion binding;GO:0008198//ferrous iron binding;
CL1227.Contig5_All	1961	0.24	0	0.4	0.04	0	0	5.91276	1.21741	-2.28002	0.0484517	Down	XP_015388870.1/8.7e-179/PREDICTED: DUF21 domain-containing protein At2g14520-like [Citrus sinensis]	XM_002263749.4/0.0/PREDICTED: Vitis vinifera DUF21 domain-containing protein At2g14520 (LOC100259537), mRNA	sp|Q8VZI2|Y4370_ARATH/8.0e-153/DUF21 domain-containing protein At4g33700 OS=Arabidopsis thaliana GN=CBSDUF6 PE=1 SV=1	cit:102612909/1.3e-179/DUF21 domain-containing protein At2g14520-like; K16302 metal transporter CNNM	At4g33700/7.6e-138/[S] KOG2118 Predicted membrane protein, contains two CBS domains	PF01595/9.2E-36/Domain of unknown function DUF21	NA
CL1232.Contig2_All	1027	3.89	3.64	3.41	1.43	1.03	1.36	59.055	21.9389	-1.42857	1.35279e-05	Down	XP_009825038.1/3.3e-28/hypothetical protein H257_02909 [Aphanomyces astaci] >ETV85020.1 hypothetical protein H257_02909 [Aphanomyces astaci]	NA	sp|Q9SQR2|ADRC2_ARATH/2.2e-16/NADPH-dependent aldehyde reductase 2, chloroplastic OS=Arabidopsis thaliana GN=ChlADR2 PE=1 SV=1	sita:101779665/8.6e-18/peroxisomal 2,4-dienoyl-CoA reductase-like; K13237 peroxisomal 2,4-dienoyl-CoA reductase [EC:1.3.1.34]	Hs10337605/4.4e-20/[R] KOG0725 Reductases with broad range of substrate specificities	PTHR24322:SF220/2.7E-30/--	NA
CL1232.Contig3_All	1033	2.67	3.21	3.14	0.86	1.32	1.42	48.7551	20.5324	-1.24765	0.000771176	Down	XP_009825038.1/1.9e-28/hypothetical protein H257_02909 [Aphanomyces astaci] >ETV85020.1 hypothetical protein H257_02909 [Aphanomyces astaci]	NA	sp|Q9SQR2|ADRC2_ARATH/1.7e-16/NADPH-dependent aldehyde reductase 2, chloroplastic OS=Arabidopsis thaliana GN=ChlADR2 PE=1 SV=1	sita:101779665/6.6e-18/peroxisomal 2,4-dienoyl-CoA reductase-like; K13237 peroxisomal 2,4-dienoyl-CoA reductase [EC:1.3.1.34]	Hs10337605/7.6e-20/[R] KOG0725 Reductases with broad range of substrate specificities	PTHR24322/1.2E-28/--	NA
CL1236.Contig1_All	754	10.87	11.94	11.09	4.64	2.8	5.83	130.532	54.3437	-1.26421	2.26303e-06	Down	XP_006438905.1/1.3e-29/hypothetical protein CICLE_v10032994mg [Citrus clementina] >ESR52145.1 hypothetical protein CICLE_v10032994mg [Citrus clementina]	XM_020545939.1/0.0/PREDICTED: Zea mays zinc finger protein CONSTANS-like (LOC109943107), transcript variant X2, mRNA	NA	lang:109349122/3.8e-07/probable cytosolic oligopeptidase A; K01414 oligopeptidase A [EC:3.4.24.70]	SPBC3D6.14c/7.0e-07/[GO] KOG4157 beta-1,6-N-acetylglucosaminyltransferase, contains WSC domain	PTHR37753/1.6E-39/--	cellular_component:GO:0016021//integral component of membrane;
CL1237.Contig1_All	996	6.55	8.23	6.43	3.89	2.94	2.05	110.648	49.3387	-1.16519	3.82773e-05	Down	XP_006485589.1/4.3e-73/PREDICTED: uncharacterized protein LOC102617111 [Citrus sinensis] >KDO48259.1 hypothetical protein CISIN_1g027977mg [Citrus sinensis]	XM_002269186.3/0.0/PREDICTED: Vitis vinifera uncharacterized LOC100263280 (LOC100263280), mRNA	NA	csl:COCSUDRAFT_83554/1.1e-06/hypothetical protein; K14790 nucleolar protein 9	NA	PTHR35732/2.0E-79/--	biological_process:GO:0009555//pollen development;
CL1237.Contig2_All	953	8.35	8.96	8.01	3.68	3.15	3.07	126.919	52.8066	-1.26512	1.88206e-09	Down	XP_011031666.1/2.1e-69/PREDICTED: uncharacterized protein LOC105130722 [Populus euphratica]	XM_002269186.3/0.0/PREDICTED: Vitis vinifera uncharacterized LOC100263280 (LOC100263280), mRNA	NA	NA	NA	PTHR35732/2.4E-75/--	NA
CL1237.Contig3_All	901	6.07	6.7	5.36	2.24	2.82	2.87	85.0933	39.2972	-1.11462	3.22512e-05	Down	XP_006485589.1/1.8e-70/PREDICTED: uncharacterized protein LOC102617111 [Citrus sinensis] >KDO48259.1 hypothetical protein CISIN_1g027977mg [Citrus sinensis]	XM_002269186.3/0.0/PREDICTED: Vitis vinifera uncharacterized LOC100263280 (LOC100263280), mRNA	NA	NA	NA	PTHR35732/1.1E-77/--	NA
CL1237.Contig5_All	989	0.65	1.14	1.09	0.38	0	0.23	13.8065	3.69452	-1.90189	0.0193542	Down	XP_011031666.1/1.7e-69/PREDICTED: uncharacterized protein LOC105130722 [Populus euphratica]	XM_002269186.3/0.0/PREDICTED: Vitis vinifera uncharacterized LOC100263280 (LOC100263280), mRNA	NA	NA	NA	PF12646/1.2E-14/Domain of unknown function (DUF3783)	NA
CL124.Contig15_All	1489	0	0.23	0.34	0.75	0.43	0.97	4.94067	17.0376	1.78595	0.0260823	Up	XP_006472862.1/1.8e-128/PREDICTED: uncharacterized protein At1g21580 [Citrus sinensis]	XM_006472799.2/0.0/PREDICTED: Citrus sinensis uncharacterized protein At1g21580 (LOC102626085), mRNA	sp|Q3ED78|C3H7_ARATH/2.0e-108/Zinc finger CCCH domain-containing protein 7 OS=Arabidopsis thaliana GN=At1g21570 PE=1 SV=1	cme:CYME_CMF161C/2.0e-15/similar to cleavage and polyadenylation specific factor 4, 30kD subunit; K14404 cleavage and polyadenylation specificity factor subunit 4	At1g21570/7.1e-104/[R] KOG1492 C3H1-type Zn-finger protein	PS50103/6.465/Zinc finger C3H1-type profile.	molecular_function:GO:0046872//metal ion binding;
CL1240.Contig12_All	2567	2.96	2.87	2.86	1.81	1.44	0.74	122.836	59.9376	-1.0352	0.00101848	Down	XP_006475458.1/2.8e-217/PREDICTED: zinc finger CCCH domain-containing protein 64 [Citrus sinensis] >KDO57790.1 hypothetical protein CISIN_1g007415mg [Citrus sinensis]	XR_001534873.1/0.0/PREDICTED: Ricinus communis zinc finger CCCH domain-containing protein 64 (LOC8272552), transcript variant X2, misc_RNA	sp|Q84WU9|C3H64_ARATH/2.0e-180/Zinc finger CCCH domain-containing protein 64 OS=Arabidopsis thaliana GN=At5g56900 PE=2 SV=1	NA	At5g56900/1.6e-180/[S] KOG2476 Uncharacterized conserved protein	PF04676/1.3E-18/Protein similar to CwfJ C-terminus 2	molecular_function:GO:0046872//metal ion binding;
CL1240.Contig14_All	2384	1.48	2.12	2.58	1.47	0.68	0.53	80.5437	37.6071	-1.09877	0.0139371	Down	XP_006475458.1/2.4e-300/PREDICTED: zinc finger CCCH domain-containing protein 64 [Citrus sinensis] >KDO57790.1 hypothetical protein CISIN_1g007415mg [Citrus sinensis]	XM_006475395.2/0.0/PREDICTED: Citrus sinensis zinc finger CCCH domain-containing protein 64 (LOC102610476), mRNA	sp|Q84WU9|C3H64_ARATH/8.0e-256/Zinc finger CCCH domain-containing protein 64 OS=Arabidopsis thaliana GN=At5g56900 PE=2 SV=1	NA	At5g56900/3.6e-251/[S] KOG2476 Uncharacterized conserved protein	PS50103/14.211/Zinc finger C3H1-type profile.	molecular_function:GO:0046872//metal ion binding;
CL1240.Contig17_All	2256	0.47	0.74	1.03	0.32	0.12	0.21	26.7207	8.71057	-1.61712	0.00674158	Down	XP_006475458.1/5.1e-191/PREDICTED: zinc finger CCCH domain-containing protein 64 [Citrus sinensis] >KDO57790.1 hypothetical protein CISIN_1g007415mg [Citrus sinensis]	XM_006475395.2/0.0/PREDICTED: Citrus sinensis zinc finger CCCH domain-containing protein 64 (LOC102610476), mRNA	sp|Q84WU9|C3H64_ARATH/4.7e-165/Zinc finger CCCH domain-containing protein 64 OS=Arabidopsis thaliana GN=At5g56900 PE=2 SV=1	NA	At5g56900/2.1e-160/[S] KOG2476 Uncharacterized conserved protein	SM00356/0.0038/zinc finger	molecular_function:GO:0046872//metal ion binding;
CL1242.Contig2_All	836	0.71	0.66	0.37	2.12	2.04	1.98	7.87881	27.3963	1.79793	0.000338366	Up	NA	LT594795.1/0.0/Theobroma cacao genome assembly, chromosome: VIII	NA	NA	NA	NA	NA
CL1242.Contig3_All	2314	2.69	2.16	1.9	7.52	7.67	7.94	86.7374	312.438	1.84885	1.74566e-33	Up	XP_006447403.1/2.0e-118/hypothetical protein CICLE_v10015168mg [Citrus clementina] >XP_006469822.1 PREDICTED: coumaroyl-CoA:anthocyanidin 3-O-glucoside-6''-O-coumaroyltransferase 2-like [Citrus sinensis] >ESR60643.1 hypothetical protein CICLE_v10015168mg [Citrus clementina]	XM_006383649.1/0.0/Populus trichocarpa hypothetical protein (POPTR_0005s25110g) mRNA, complete cds	sp|Q9ZWB4|3AT1_ARATH/2.5e-68/Coumaroyl-CoA:anthocyanidin 3-O-glucoside-6''-O-coumaroyltransferase 1 OS=Arabidopsis thaliana GN=3AT1 PE=1 SV=1	gmx:100127426/1.1e-63/IF7MaT, GmIF7MaT; malonyl-CoA:isoflavone 7-O-glucoside-6''-O-malonyltransferase; K13264 isoflavone 7-O-glucoside-6''-O-malonyltransferase [EC:2.3.1.115]	At1g03940/5.8e-68/[RQ] LSE0274 A Predicted anthocyanin acyltransferase	PTHR31625/4.1E-167/--	molecular_function:GO:0016747//transferase activity, transferring acyl groups other than amino-acyl groups;
CL1247.Contig1_All	1233	3.48	2.73	2.68	1.31	1.25	1.02	57.8228	24.9296	-1.21378	0.000286626	Down	XP_006426872.1/2.6e-173/hypothetical protein CICLE_v10025091mg [Citrus clementina] >ESR40112.1 hypothetical protein CICLE_v10025091mg [Citrus clementina]	XM_006426809.1/0.0/Citrus clementina hypothetical protein (CICLE_v10025091mg) mRNA, complete cds	sp|F4IB81|LYK3_ARATH/1.2e-149/LysM domain receptor-like kinase 3 OS=Arabidopsis thaliana GN=LYK3 PE=2 SV=1	hbr:110654047/5.8e-77/lysM domain receptor-like kinase 3; K04733 interleukin-1 receptor-associated kinase 4 [EC:2.7.11.1]	At1g51940/2.7e-149/[T] LSE0057 A Protein kinase, contains LysM domains	PS00107/-/Protein kinases ATP-binding region signature.	cellular_component:GO:0016021//integral component of membrane;molecular_function:GO:0005524//ATP binding;GO:0004672//protein kinase activity;
CL1247.Contig2_All	2823	6.39	6.22	6.84	1.85	1.76	2.45	305.56	100.949	-1.59783	5.72473e-25	Down	XP_006426872.1/0.0e+00/hypothetical protein CICLE_v10025091mg [Citrus clementina] >ESR40112.1 hypothetical protein CICLE_v10025091mg [Citrus clementina]	XM_006426809.1/0.0/Citrus clementina hypothetical protein (CICLE_v10025091mg) mRNA, complete cds	sp|F4IB81|LYK3_ARATH/2.6e-266/LysM domain receptor-like kinase 3 OS=Arabidopsis thaliana GN=LYK3 PE=2 SV=1	vra:106780768/5.3e-102/lysM domain receptor-like kinase 3; K04733 interleukin-1 receptor-associated kinase 4 [EC:2.7.11.1]	At1g51940/5.8e-264/[T] LSE0057 A Protein kinase, contains LysM domains	PF07714/4.9E-51/Protein tyrosine kinase	cellular_component:GO:0016021//integral component of membrane;molecular_function:GO:0005524//ATP binding;GO:0004672//protein kinase activity;
CL125.Contig2_All	2643	5.76	4.37	5.54	10.33	10.04	10.1	230.766	472.66	1.03437	1.97197e-18	Up	XP_006430523.1/2.5e-189/hypothetical protein CICLE_v10011717mg [Citrus clementina] >ESR43763.1 hypothetical protein CICLE_v10011717mg [Citrus clementina]	XM_006430460.1/0.0/Citrus clementina hypothetical protein (CICLE_v10011717mg) mRNA, complete cds	sp|Q9FHK9|MD26B_ARATH/2.3e-107/Probable mediator of RNA polymerase II transcription subunit 26b OS=Arabidopsis thaliana GN=MED26B PE=2 SV=1	eus:EUTSA_v10016682mg/6.7e-06/hypothetical protein; K03145 transcription elongation factor S-II	Hs20473950/3.2e-06/[K] KOG1105 Transcription elongation factor TFIIS/Cofactor of enhancer-binding protein Sp1	PTHR15141:SF40/6.6E-193/--	cellular_component:GO:0005634//nucleus;
CL1251.Contig1_All	665	1.42	1.13	1.54	3.85	2.72	3.37	14.2337	34.9129	1.29445	0.00291504	Up	OQR83918.1/3.2e-40/hypothetical protein ACHHYP_14168 [Achlya hypogyna]	NA	NA	NA	SPAC4A8.02c/9.1e-43/[S] KOG3267 Uncharacterized conserved protein	PF01894/1.5E-37/Uncharacterised protein family UPF0047	NA
CL1254.Contig4_All	1657	1.13	1.23	1.03	0.25	0.1	0.14	29.604	5.32495	-2.47495	3.72662e-06	Down	OWM78195.1/2.5e-118/hypothetical protein CDL15_Pgr015014 [Punica granatum]	NA	sp|F4HQD4|HSP7P_ARATH/3.2e-102/Heat shock 70 kDa protein 15 OS=Arabidopsis thaliana GN=HSP70-15 PE=1 SV=1	jcu:105634970/3.8e-116/heat shock 70 kDa protein 15; K09489 heat shock 70kDa protein 4	SPAC110.04c/3.1e-124/[O] KOG0103 Molecular chaperones HSP105/HSP110/SSE1, HSP70 superfamily	PS01036/-/Heat shock hsp70 proteins family signature 3.	molecular_function:GO:0005524//ATP binding;
CL1254.Contig5_All	2485	3.11	3.06	2.54	0.91	0.85	1.37	119.652	46.1751	-1.37365	7.25854e-08	Down	OAE20350.1/1.8e-176/hypothetical protein AXG93_209s1180 [Marchantia polymorpha subsp. ruderalis]	NA	sp|Q9SAB1|HSP7Q_ARATH/1.2e-153/Heat shock 70 kDa protein 16 OS=Arabidopsis thaliana GN=HSP70-16 PE=2 SV=1	brp:103863125/5.8e-169/heat shock 70 kDa protein 15; K09489 heat shock 70kDa protein 4	Hs5729879/2.4e-165/[O] KOG0103 Molecular chaperones HSP105/HSP110/SSE1, HSP70 superfamily	PF00012/1.1E-161/Hsp70 protein	molecular_function:GO:0005524//ATP binding;
CL1255.Contig1_All	584	1.35	1.36	2.3	0.11	0.33	0.27	13.5584	2.61457	-2.37454	0.00183236	Down	XP_002283165.2/3.9e-34/PREDICTED: uncharacterized protein LOC100249288 isoform X1 [Vitis vinifera]	XM_018128321.1/0.0/PREDICTED: Theobroma cacao uncharacterized LOC18587586 (LOC18587586), mRNA	NA	NA	NA	NA	NA
CL1255.Contig2_All	766	3.22	1.74	1.35	0.25	0.48	0.84	23.7499	7.05193	-1.75183	0.00696567	Down	XP_006450103.1/6.2e-40/hypothetical protein CICLE_v10010266mg [Citrus clementina] >ESR63343.1 hypothetical protein CICLE_v10010266mg [Citrus clementina]	XM_018128321.1/0.0/PREDICTED: Theobroma cacao uncharacterized LOC18587586 (LOC18587586), mRNA	NA	NA	NA	PTHR10168/6.3E-29/--	NA
CL1263.Contig1_All	2334	5.62	5.82	4.38	37.45	37.24	38.49	204.859	1545.95	2.91579	1.37259e-259	Up	XP_002272074.2/2.1e-264/PREDICTED: protein NUCLEAR FUSION DEFECTIVE 4 [Vitis vinifera]	XM_021768940.1/0.0/PREDICTED: Manihot esculenta protein NUCLEAR FUSION DEFECTIVE 4-like (LOC110623916), mRNA	NA	aly:ARALYDRAFT_321151/1.9e-92/hypothetical protein; K14794 ribosomal RNA-processing protein 12	At2g39210/3.8e-261/[GR] TWOG0181 Predicted monocarboxylate transporter/nodulin related protein	PTHR21576/0.0/--	biological_process:GO:0055085//transmembrane transport;cellular_component:GO:0016021//integral component of membrane;
CL1263.Contig2_All	2061	20.43	17.43	17.98	55.45	55.3	57.83	636.071	2024.4	1.67023	2.12172e-149	Up	XP_021624632.1/2.3e-214/protein NUCLEAR FUSION DEFECTIVE 4-like [Manihot esculenta] >OAY38899.1 hypothetical protein MANES_10G051300 [Manihot esculenta]	XM_021768940.1/0.0/PREDICTED: Manihot esculenta protein NUCLEAR FUSION DEFECTIVE 4-like (LOC110623916), mRNA	NA	aly:ARALYDRAFT_321151/7.9e-71/hypothetical protein; K14794 ribosomal RNA-processing protein 12	At2g39210/2.9e-212/[GR] TWOG0181 Predicted monocarboxylate transporter/nodulin related protein	PF06813/1.7E-53/Nodulin-like	biological_process:GO:0055085//transmembrane transport;cellular_component:GO:0016021//integral component of membrane;
CL1263.Contig3_All	2393	9.32	9.03	8.81	55.47	59.33	59.06	361.392	2437.67	2.75387	0	Up	XP_006436518.1/3.8e-269/hypothetical protein CICLE_v10030988mg [Citrus clementina] >XP_006485321.1 PREDICTED: protein NUCLEAR FUSION DEFECTIVE 4-like [Citrus sinensis] >ESR49758.1 hypothetical protein CICLE_v10030988mg [Citrus clementina]	XM_021768940.1/0.0/PREDICTED: Manihot esculenta protein NUCLEAR FUSION DEFECTIVE 4-like (LOC110623916), mRNA	NA	aly:ARALYDRAFT_321151/2.2e-93/hypothetical protein; K14794 ribosomal RNA-processing protein 12	At2g39210/2.1e-262/[GR] TWOG0181 Predicted monocarboxylate transporter/nodulin related protein	PF07690/1.5E-9/Major Facilitator Superfamily	biological_process:GO:0055085//transmembrane transport;cellular_component:GO:0016021//integral component of membrane;
CL127.Contig12_All	4658	0.84	0.63	0.77	2.04	1.89	2.24	58.7056	170.481	1.53804	5.05244e-15	Up	XP_006470767.1/9.0e-150/PREDICTED: TMV resistance protein N-like [Citrus sinensis]	XM_006470704.2/0.0/PREDICTED: Citrus sinensis TMV resistance protein N-like (LOC102621748), mRNA	sp|Q40392|TMVRN_NICGU/2.1e-95/TMV resistance protein N OS=Nicotiana glutinosa GN=N PE=1 SV=1	ccaj:109818165/1.5e-106/TMV resistance protein N-like; K22038 volume-regulated anion channel	At5g17680/8.8e-108/[VT] LSE0039 A Disease resistance protein (TIR-NBS-LRR class)	PS50104/16.084/TIR domain profile.	biological_process:GO:0007165//signal transduction;molecular_function:GO:0043531//ADP binding;
CL127.Contig13_All	1818	0.64	0.76	0.15	0	0.08	0.11	14.1824	2.55193	-2.47444	0.00515771	Down	XP_006470767.1/8.3e-59/PREDICTED: TMV resistance protein N-like [Citrus sinensis]	XM_019198463.1/0.0/PREDICTED: Nelumbo nucifera TMV resistance protein N-like (LOC104601664), mRNA	sp|O48573|LAZ5_ARATH/1.3e-27/Disease resistance protein LAZ5 OS=Arabidopsis thaliana GN=LAZ5 PE=1 SV=1	pavi:110747480/4.7e-35/TMV resistance protein N-like; K19613 leucine-rich repeat protein SHOC2	At4g12010/9.8e-39/[VT] LSE0039 A Disease resistance protein (TIR-NBS-LRR class)	PS51450/6.719/Leucine-rich repeat profile.	biological_process:GO:0007165//signal transduction;GO:0006952//defense response;molecular_function:GO:0043531//ADP binding;
CL127.Contig15_All	5132	0.59	0.75	0.82	1.71	2.17	1.94	62.5673	177.713	1.50607	6.95827e-14	Up	XP_006491535.1/5.0e-250/PREDICTED: protein SUPPRESSOR OF npr1-1, CONSTITUTIVE 1-like isoform X1 [Citrus sinensis] >XP_015389793.1 PREDICTED: protein SUPPRESSOR OF npr1-1, CONSTITUTIVE 1-like isoform X1 [Citrus sinensis]	XM_006470704.2/0.0/PREDICTED: Citrus sinensis TMV resistance protein N-like (LOC102621748), mRNA	sp|Q40392|TMVRN_NICGU/1.7e-154/TMV resistance protein N OS=Nicotiana glutinosa GN=N PE=1 SV=1	ccaj:109818165/2.6e-147/TMV resistance protein N-like; K22038 volume-regulated anion channel	At5g17680/1.0e-173/[VT] LSE0039 A Disease resistance protein (TIR-NBS-LRR class)	PF00931/1.3E-33/NB-ARC domain	NA
CL127.Contig17_All	4860	0.82	1.12	1.21	1.94	2.15	1.92	86.5344	173.261	1.0016	2.58621e-07	Up	XP_006491535.1/1.3e-207/PREDICTED: protein SUPPRESSOR OF npr1-1, CONSTITUTIVE 1-like isoform X1 [Citrus sinensis] >XP_015389793.1 PREDICTED: protein SUPPRESSOR OF npr1-1, CONSTITUTIVE 1-like isoform X1 [Citrus sinensis]	XM_006470704.2/0.0/PREDICTED: Citrus sinensis TMV resistance protein N-like (LOC102621748), mRNA	sp|Q40392|TMVRN_NICGU/5.8e-120/TMV resistance protein N OS=Nicotiana glutinosa GN=N PE=1 SV=1	ccaj:109818165/2.3e-113/TMV resistance protein N-like; K22038 volume-regulated anion channel	At5g17680/2.6e-131/[VT] LSE0039 A Disease resistance protein (TIR-NBS-LRR class)	PF01582/9.0E-11/TIR domain	NA
CL127.Contig28_All	4953	0.6	0.68	0.5	1.24	1.11	1.1	49.8234	101.159	1.02172	1.96742e-05	Up	XP_006491535.1/2.6e-264/PREDICTED: protein SUPPRESSOR OF npr1-1, CONSTITUTIVE 1-like isoform X1 [Citrus sinensis] >XP_015389793.1 PREDICTED: protein SUPPRESSOR OF npr1-1, CONSTITUTIVE 1-like isoform X1 [Citrus sinensis]	XM_006470704.2/0.0/PREDICTED: Citrus sinensis TMV resistance protein N-like (LOC102621748), mRNA	sp|Q40392|TMVRN_NICGU/5.3e-153/TMV resistance protein N OS=Nicotiana glutinosa GN=N PE=1 SV=1	ccaj:109818165/2.9e-143/TMV resistance protein N-like; K22038 volume-regulated anion channel	At4g12010/1.7e-170/[VT] LSE0039 A Disease resistance protein (TIR-NBS-LRR class)	PF13855/1.6E-7/Leucine rich repeat	NA
CL127.Contig31_All	2537	0.53	0.47	0.48	0.96	0.9	1.25	20.6221	45.282	1.13474	0.00291277	Up	XP_006470767.1/7.1e-157/PREDICTED: TMV resistance protein N-like [Citrus sinensis]	XM_006470704.2/0.0/PREDICTED: Citrus sinensis TMV resistance protein N-like (LOC102621748), mRNA	sp|Q40392|TMVRN_NICGU/1.2e-95/TMV resistance protein N OS=Nicotiana glutinosa GN=N PE=1 SV=1	ccaj:109818165/4.8e-102/TMV resistance protein N-like; K22038 volume-regulated anion channel	At5g17680/1.6e-108/[VT] LSE0039 A Disease resistance protein (TIR-NBS-LRR class)	PF01582/3.9E-7/TIR domain	biological_process:GO:0007165//signal transduction;GO:0006952//defense response;molecular_function:GO:0043531//ADP binding;
CL1271.Contig16_All	1435	0.85	0.88	0.7	2.01	2	1.7	18.7084	46.3244	1.30809	0.000331935	Up	NA	NA	NA	NA	NA	NA	NA
CL1271.Contig17_All	2202	0.45	0.59	0.5	1.06	1.63	1.1	18.7814	47.8583	1.34947	0.000601517	Up	NA	NA	NA	NA	NA	NA	NA
CL1271.Contig27_All	1526	0.2	0.11	0.13	0.85	0.82	0.77	3.79422	20.26	2.41676	0.000101174	Up	NA	NA	NA	NA	NA	NA	NA
CL1271.Contig3_All	979	0	0	0	0	0.57	0.38	0.740674	4.26299	2.52495	0.0275865	Up	NA	NA	NA	NA	NA	NA	NA
CL1271.Contig39_All	2716	0.5	0.49	0.26	1.14	0.76	1.21	19.1627	48.8623	1.35042	0.00117161	Up	NA	HG975445.1/0.0/Solanum pennellii chromosome ch06, complete genome	NA	NA	NA	NA	NA
CL1271.Contig44_All	6822	1.23	1.79	1.93	3.46	3.43	3.4	191.583	419.614	1.13109	1.17706e-13	Up	NA	NA	NA	NA	NA	NA	NA
CL1271.Contig45_All	6423	0.3	0.6	0.28	1.05	0.98	0.68	42.8718	103.082	1.26569	0.00054177	Up	NA	XM_010674141.2/0.0/PREDICTED: Beta vulgaris subsp. vulgaris hypothetical protein (LOC104889013), mRNA	NA	NA	NA	NA	NA
CL1271.Contig50_All	2953	0.62	0.9	0.96	1.83	2.22	1.52	41.0081	95.923	1.22597	2.21743e-05	Up	NA	NA	NA	NA	NA	NA	NA
CL1271.Contig51_All	5133	0.8	1.07	1.09	2.68	2.45	2	86.0777	217.339	1.33624	3.24144e-12	Up	NA	NA	NA	NA	NA	NA	NA
CL1279.Contig1_All	377	0	0	0	0.94	0.37	0.37	0.507408	2.53158	2.31882	0.0487074	Up	NA	NA	NA	NA	NA	NA	NA
CL1279.Contig2_All	483	0	0	0	1.67	0.95	1.49	0.687936	9.40309	3.77279	9.41289e-05	Up	NA	NA	NA	NA	NA	NA	NA
CL1283.Contig1_All	1404	4.84	4.91	5.88	15.41	13.8	14.69	119.469	352.041	1.55911	6.52777e-32	Up	NA	NA	NA	NA	YKL051w/7.9e-12/[S] TWOG0117 Predicted membrane protein	PF10277/3.7E-45/Frag1/DRAM/Sfk1 family	NA
CL1286.Contig2_All	1057	0.89	0.4	0.97	1.39	1.6	1.72	12.6163	27.1523	1.10579	0.0368728	Up	KXZ48094.1/1.7e-80/hypothetical protein GPECTOR_30g189 [Gonium pectorale]	HG975518.1/0.0/Solanum lycopersicum chromosome ch06, complete genome	NA	NA	SPBC530.15c/1.4e-45/[R] KOG0255 Synaptic vesicle transporter SVOP and related transporters (major facilitator superfamily)	PTHR23502/2.4E-107/--	biological_process:GO:0055085//transmembrane transport;cellular_component:GO:0016021//integral component of membrane;
CL1288.Contig2_All	1476	3.8	3.2	2.53	0.68	0.88	0.97	75.5638	21.4106	-1.81937	3.28834e-08	Down	OUS44632.1/1.6e-60/NADH:flavin oxidoreductase/NADH oxidase [Ostreococcus tauri]	XM_014047229.1/0.0/Monoraphidium neglectum N-ethylmaleimide reductase mRNA	sp|Q84QK0|OPR1_ORYSJ/2.4e-24/12-oxophytodienoate reductase 1 OS=Oryza sativa subsp. japonica GN=OPR1 PE=2 SV=1	osa:4340490/5.8e-23/12-oxophytodienoate reductase 1 isoform X2; K05894 12-oxophytodienoic acid reductase [EC:1.3.1.42]	CE09448/3.1e-99/[CR] KOG0134 NADH:flavin oxidoreductase/12-oxophytodienoate reductase	PF00724/4.5E-39/NADH:flavin oxidoreductase / NADH oxidase family	biological_process:GO:0006952//defense response;GO:0009695//jasmonic acid biosynthetic process;GO:0031408//oxylipin biosynthetic process;cellular_component:GO:0016021//integral component of membrane;GO:0005622//intracellular;molecular_function:GO:0016629//12-oxophytodienoate reductase activity;GO:0010181//FMN binding;GO:0016491//oxidoreductase activity;
CL1288.Contig3_All	1284	1.28	0.98	0.92	0.23	0.56	0.47	21.1123	9.13403	-1.20876	0.0498114	Down	OUS44632.1/2.0e-62/NADH:flavin oxidoreductase/NADH oxidase [Ostreococcus tauri]	NA	sp|Q84QK0|OPR1_ORYSJ/7.1e-25/12-oxophytodienoate reductase 1 OS=Oryza sativa subsp. japonica GN=OPR1 PE=2 SV=1	sita:101764189/3.5e-24/12-oxophytodienoate reductase 1-like; K05894 12-oxophytodienoic acid reductase [EC:1.3.1.42]	CE09448/2.4e-92/[CR] KOG0134 NADH:flavin oxidoreductase/12-oxophytodienoate reductase	PF00724/9.4E-43/NADH:flavin oxidoreductase / NADH oxidase family	cellular_component:GO:0016021//integral component of membrane;molecular_function:GO:0010181//FMN binding;GO:0016491//oxidoreductase activity;
CL1288.Contig4_All	786	0.72	1.57	1.15	0.32	0.47	0.33	13.3538	4.81167	-1.47264	0.0470086	Down	OUS44632.1/8.3e-40/NADH:flavin oxidoreductase/NADH oxidase [Ostreococcus tauri]	NA	sp|Q84QK0|OPR1_ORYSJ/2.1e-24/12-oxophytodienoate reductase 1 OS=Oryza sativa subsp. japonica GN=OPR1 PE=2 SV=1	osa:4340490/5.2e-23/12-oxophytodienoate reductase 1 isoform X2; K05894 12-oxophytodienoic acid reductase [EC:1.3.1.42]	CE09448/7.7e-57/[CR] KOG0134 NADH:flavin oxidoreductase/12-oxophytodienoate reductase	PTHR22893/1.0E-133/--	cellular_component:GO:0016021//integral component of membrane;molecular_function:GO:0010181//FMN binding;GO:0016491//oxidoreductase activity;
CL1288.Contig5_All	1449	3.95	4.39	3.22	1.28	0.88	1.52	90.3584	31.1219	-1.53773	2.00784e-07	Down	OUS44632.1/1.2e-60/NADH:flavin oxidoreductase/NADH oxidase [Ostreococcus tauri]	XM_014047229.1/0.0/Monoraphidium neglectum N-ethylmaleimide reductase mRNA	sp|Q84QK0|OPR1_ORYSJ/2.3e-24/12-oxophytodienoate reductase 1 OS=Oryza sativa subsp. japonica GN=OPR1 PE=2 SV=1	osa:4340490/5.6e-23/12-oxophytodienoate reductase 1 isoform X2; K05894 12-oxophytodienoic acid reductase [EC:1.3.1.42]	CE09448/3.0e-99/[CR] KOG0134 NADH:flavin oxidoreductase/12-oxophytodienoate reductase	PTHR22893:SF36/2.2E-205/--	biological_process:GO:0006952//defense response;GO:0009695//jasmonic acid biosynthetic process;GO:0031408//oxylipin biosynthetic process;cellular_component:GO:0016021//integral component of membrane;GO:0005622//intracellular;molecular_function:GO:0016629//12-oxophytodienoate reductase activity;GO:0010181//FMN binding;GO:0016491//oxidoreductase activity;
CL1288.Contig6_All	1455	0.99	0.77	1.5	0.42	0.54	0.28	24.6447	10.2307	-1.26837	0.0324279	Down	OUS44632.1/9.3e-61/NADH:flavin oxidoreductase/NADH oxidase [Ostreococcus tauri]	XM_014047229.1/0.0/Monoraphidium neglectum N-ethylmaleimide reductase mRNA	sp|Q84QK0|OPR1_ORYSJ/2.3e-24/12-oxophytodienoate reductase 1 OS=Oryza sativa subsp. japonica GN=OPR1 PE=2 SV=1	osa:4340490/5.7e-23/12-oxophytodienoate reductase 1 isoform X2; K05894 12-oxophytodienoic acid reductase [EC:1.3.1.42]	CE09448/5.2e-99/[CR] KOG0134 NADH:flavin oxidoreductase/12-oxophytodienoate reductase	PTHR22893/2.8E-203/--	biological_process:GO:0006952//defense response;GO:0009695//jasmonic acid biosynthetic process;GO:0031408//oxylipin biosynthetic process;cellular_component:GO:0016021//integral component of membrane;GO:0005622//intracellular;molecular_function:GO:0016629//12-oxophytodienoate reductase activity;GO:0010181//FMN binding;GO:0016491//oxidoreductase activity;
CL1289.Contig1_All	1684	23.98	27.61	23.87	11.63	11.87	11.53	694.744	340.285	-1.02974	3.17787e-30	Down	XP_006473589.1/3.1e-108/PREDICTED: B-box zinc finger protein 21 [Citrus sinensis]	XM_010106975.1/0.0/Morus notabilis putative salt tolerance-like protein partial mRNA	sp|Q9LQZ7|BBX21_ARATH/3.8e-79/B-box zinc finger protein 21 OS=Arabidopsis thaliana GN=BBX21 PE=1 SV=1	boe:106316836/2.0e-16/zinc finger protein CONSTANS; K12135 zinc finger protein CONSTANS	At1g75540/9.0e-79/[R] LSE0153 A CONSTANS-like B-box Zn-finger protein	PTHR31832:SF6/1.0E-152/--	cellular_component:GO:0005622//intracellular;molecular_function:GO:0008270//zinc ion binding;
CL1289.Contig3_All	1774	1.13	0.93	1.61	0	0.35	0.32	34.383	7.36987	-2.22199	0.000481528	Down	XP_006473589.1/9.2e-71/PREDICTED: B-box zinc finger protein 21 [Citrus sinensis]	XM_010106975.1/0.0/Morus notabilis putative salt tolerance-like protein partial mRNA	sp|Q9LQZ7|BBX21_ARATH/1.4e-47/B-box zinc finger protein 21 OS=Arabidopsis thaliana GN=BBX21 PE=1 SV=1	ath:AT5G15840/4.5e-06/CO; B-box type zinc finger protein with CCT domain-containing protein; K12135 zinc finger protein CONSTANS	At1g75540/3.3e-47/[R] LSE0153 A CONSTANS-like B-box Zn-finger protein	PTHR31832:SF6/1.4E-90/--	cellular_component:GO:0005622//intracellular;molecular_function:GO:0008270//zinc ion binding;
CL1289.Contig5_All	1649	24.52	26.7	25.82	11.41	12.54	11.88	693.685	340.858	-1.02511	3.43337e-35	Down	XP_006473589.1/5.9e-104/PREDICTED: B-box zinc finger protein 21 [Citrus sinensis]	XM_010106975.1/0.0/Morus notabilis putative salt tolerance-like protein partial mRNA	sp|Q9LQZ7|BBX21_ARATH/5.6e-75/B-box zinc finger protein 21 OS=Arabidopsis thaliana GN=BBX21 PE=1 SV=1	boe:106316836/1.7e-15/zinc finger protein CONSTANS; K12135 zinc finger protein CONSTANS	At1g75540/1.3e-74/[R] LSE0153 A CONSTANS-like B-box Zn-finger protein	PTHR31832/3.0E-149/--	NA
CL129.Contig1_All	5109	2.06	1.89	2.26	4.01	4.92	4.69	179.275	414.09	1.20777	8.49201e-21	Up	XP_006471199.1/3.5e-304/PREDICTED: TMV resistance protein N-like isoform X2 [Citrus sinensis]	XM_006431712.1/0.0/Citrus clementina hypothetical protein (CICLE_v10003293mg) mRNA, partial cds	sp|Q40392|TMVRN_NICGU/6.2e-157/TMV resistance protein N OS=Nicotiana glutinosa GN=N PE=1 SV=1	ccaj:109818165/1.8e-196/TMV resistance protein N-like; K22038 volume-regulated anion channel	At5g36930/4.8e-168/[VT] LSE0039 A Disease resistance protein (TIR-NBS-LRR class)	PF01582/5.9E-53/TIR domain	NA
CL129.Contig10_All	1295	1.51	1.54	1.42	5.25	4.56	4.27	31.0355	102.73	1.72686	7.54706e-12	Up	XP_006471198.1/1.1e-41/PREDICTED: TMV resistance protein N-like isoform X1 [Citrus sinensis]	NA	sp|Q40392|TMVRN_NICGU/1.1e-14/TMV resistance protein N OS=Nicotiana glutinosa GN=N PE=1 SV=1	ccaj:109818165/3.6e-21/TMV resistance protein N-like; K22038 volume-regulated anion channel	At5g17680/6.8e-18/[VT] LSE0039 A Disease resistance protein (TIR-NBS-LRR class)	PS51450/7.104/Leucine-rich repeat profile.	NA
CL129.Contig17_All	3232	1.72	2.11	1.54	3.59	3.5	3.63	97.3949	203.85	1.06559	2.57104e-10	Up	XP_006471198.1/2.3e-205/PREDICTED: TMV resistance protein N-like isoform X1 [Citrus sinensis]	XM_015526467.1/0.0/PREDICTED: Citrus sinensis probable WRKY transcription factor 19 (LOC107175105), mRNA	sp|Q40392|TMVRN_NICGU/4.4e-100/TMV resistance protein N OS=Nicotiana glutinosa GN=N PE=1 SV=1	ccaj:109818165/8.5e-120/TMV resistance protein N-like; K22038 volume-regulated anion channel	At5g36930/3.1e-112/[VT] LSE0039 A Disease resistance protein (TIR-NBS-LRR class)	PS51450/7.288/Leucine-rich repeat profile.	molecular_function:GO:0043531//ADP binding;
CL129.Contig2_All	1446	1.93	1.54	1.57	8.77	7.23	7.93	39.8553	197.04	2.30565	9.59349e-30	Up	XP_006471198.1/1.2e-55/PREDICTED: TMV resistance protein N-like isoform X1 [Citrus sinensis]	NA	sp|Q40392|TMVRN_NICGU/2.2e-19/TMV resistance protein N OS=Nicotiana glutinosa GN=N PE=1 SV=1	pavi:110747480/3.3e-31/TMV resistance protein N-like; K19613 leucine-rich repeat protein SHOC2	At5g17680/2.1e-20/[VT] LSE0039 A Disease resistance protein (TIR-NBS-LRR class)	PS51450/7.258/Leucine-rich repeat profile.	molecular_function:GO:0043531//ADP binding;
CL129.Contig6_All	1356	3.48	2.93	2.9	6.27	7.05	5.33	68.2366	143.428	1.0717	3.58565e-07	Up	XP_006471198.1/3.2e-63/PREDICTED: TMV resistance protein N-like isoform X1 [Citrus sinensis]	NA	sp|Q40392|TMVRN_NICGU/4.0e-18/TMV resistance protein N OS=Nicotiana glutinosa GN=N PE=1 SV=1	ghi:107918178/5.1e-34/TMV resistance protein N-like; K19613 leucine-rich repeat protein SHOC2	At1g69550/1.9e-23/[VT] LSE0039 A Disease resistance protein (TIR-NBS-LRR class)	PTHR11017:SF174/1.9E-28/--	molecular_function:GO:0043531//ADP binding;
CL1291.Contig2_All	832	3.21	3.87	2.23	7.7	8.21	8.92	40.3547	112.255	1.47597	1.09489e-08	Up	NA	CP023115.1/0.0/Lupinus angustiflorus cultivar Tanjil chromosome LG-03	NA	NA	NA	NA	NA
CL1296.Contig20_All	2349	0	0	0	0.36	0	0.51	1.08981	10.6699	3.29139	0.00170196	Up	OIW13489.1/1.5e-20/hypothetical protein TanjilG_01057 [Lupinus angustifolius]	XM_006433354.1/0.0/Citrus clementina hypothetical protein (CICLE_v10001045mg) mRNA, complete cds	NA	rcu:107260760/8.6e-13/heparan-alpha-glucosaminide N-acetyltransferase; K10532 heparan-alpha-glucosaminide N-acetyltransferase [EC:2.3.1.78]	At5g27730/1.0e-08/[S] KOG4683 Uncharacterized conserved protein	NA	NA
CL1296.Contig34_All	1928	2.73	2.5	2.76	1.07	1.24	1.16	84.2414	38.9552	-1.11271	1.42237e-05	Down	XP_006431470.1/1.4e-43/hypothetical protein CICLE_v10000193mg [Citrus clementina] >ESR44710.1 hypothetical protein CICLE_v10000193mg [Citrus clementina]	NA	sp|O65440|BAME3_ARATH/2.8e-25/Leucine-rich repeat receptor-like serine/threonine-protein kinase BAM3 OS=Arabidopsis thaliana GN=BAM3 PE=2 SV=3	soe:110791345/5.0e-27/receptor protein kinase CLAVATA1-like; K00924 kinase [EC:2.7.1.-]	At1g47890/7.0e-27/[R] KOG0619 FOG: Leucine rich repeat	PF00560/0.18/Leucine Rich Repeat	cellular_component:GO:0016021//integral component of membrane;
CL130.Contig2_All	671	13.16	10.66	12.12	6.27	4.18	5.53	121.527	57.2243	-1.08658	3.98562e-06	Down	OMO74392.1/1.2e-34/putative 30S ribosomal protein S31, mitochondrial precursor [Corchorus capsularis] >OMO75538.1 putative 30S ribosomal protein S31, mitochondrial precursor [Corchorus olitorius]	XM_016326689.2/0.0/PREDICTED: Arachis ipaensis 30S ribosomal protein S31, mitochondrial (LOC107624207), mRNA	sp|Q9SJU8|RT31_ARATH/9.4e-29/30S ribosomal protein S31, mitochondrial OS=Arabidopsis thaliana GN=At2g21290 PE=3 SV=1	mcha:111007814/1.8e-32/30S ribosomal protein S31, mitochondrial; K19033 RPS31; 30S ribosomal protein S31	NA	PTHR34550:SF2/3.1E-38/--	cellular_component:GO:0005840//ribosome;
CL1300.Contig2_All	2389	0.22	0.58	0.64	1.29	1.65	1.73	19.678	64.6962	1.7171	1.44043e-05	Up	XP_002961540.1/8.6e-96/hypothetical protein SELMODRAFT_164833 [Selaginella moellendorffii] >EFJ36800.1 hypothetical protein SELMODRAFT_164833 [Selaginella moellendorffii]	NA	sp|Q8VZM1|NAA15_ARATH/3.5e-86/N-terminal acetyltransferase A complex auxiliary subunit NAA15 OS=Arabidopsis thaliana GN=NAA15 PE=1 SV=1	smo:SELMODRAFT_164833/1.3e-96/hypothetical protein; K20792 N-alpha-acetyltransferase 15/16, NatA auxiliary subunit	SPCC338.07c/5.3e-109/[B] KOG1156 N-terminal acetyltransferase	PF12569/7.4E-186/NMDA receptor-regulated protein 1	biological_process:GO:0017196//N-terminal peptidyl-methionine acetylation;cellular_component:GO:0005737//cytoplasm;molecular_function:GO:0016740//transferase activity;
CL1302.Contig10_All	3114	0.3	0.04	0.28	1.86	0.47	0.81	12.4155	54.9949	2.14715	0.00126856	Up	XP_006452765.1/1.6e-203/hypothetical protein CICLE_v10008155mg [Citrus clementina] >ESR66005.1 hypothetical protein CICLE_v10008155mg [Citrus clementina]	XM_006452702.1/0.0/Citrus clementina hypothetical protein (CICLE_v10008155mg) mRNA, complete cds	sp|Q9FKT0|ARP8_ARATH/9.9e-182/Actin-related protein 8 OS=Arabidopsis thaliana GN=ARP8 PE=2 SV=1	cit:102623727/3.1e-204/actin-related protein 8; K16616 actin-related protein 8, plant	At5g56180/2.3e-181/[Z] KOG0676 Actin and related proteins	SM00268/4.9E-15/Actin	NA
CL1302.Contig7_All	1600	0.51	0.67	0.37	1.35	1.04	1.16	13.5634	31.8763	1.23277	0.00794938	Up	XP_012074147.1/8.9e-89/actin-related protein 8 [Jatropha curcas] >KDP36317.1 hypothetical protein JCGZ_09532 [Jatropha curcas]	XM_006452702.1/0.0/Citrus clementina hypothetical protein (CICLE_v10008155mg) mRNA, complete cds	sp|Q9FKT0|ARP8_ARATH/1.0e-81/Actin-related protein 8 OS=Arabidopsis thaliana GN=ARP8 PE=2 SV=1	jcu:105635684/1.3e-89/actin-related protein 8; K16616 actin-related protein 8, plant	At5g56180/2.4e-81/[Z] KOG0676 Actin and related proteins	PF00022/1.9E-20/Actin	NA
CL1304.Contig1_All	1252	4.56	5.45	3.9	1.49	1.36	1.22	93.2767	29.4275	-1.66435	2.22109e-09	Down	OLP79455.1/3.5e-08/1,3-propanediol dehydrogenase [Symbiodinium microadriaticum]	NA	NA	NA	SPAC5H10.06c/1.2e-16/[C] KOG3857 Alcohol dehydrogenase, class IV	PF00465/1.5E-69/Iron-containing alcohol dehydrogenase	NA
CL1304.Contig2_All	1441	6.34	6.06	5.48	1.38	1.3	1.85	138.941	37.8251	-1.87706	2.88099e-16	Down	XP_012066417.1/1.0e-06/mucin-17 [Jatropha curcas] >KDP47134.1 hypothetical protein JCGZ_22130 [Jatropha curcas]	NA	sp|P40603|APG_BRANA/3.4e-07/Anther-specific proline-rich protein APG (Fragment) OS=Brassica napus GN=APG PE=2 SV=1	NA	NA	PS00060/-/Iron-containing alcohol dehydrogenases signature 2.	NA
CL1309.Contig1_All	1404	5.42	5.31	5.22	2.53	2.22	2.24	120.575	56.1099	-1.1036	1.23504e-07	Down	EOY18632.1/7.7e-129/Tryptophan/tyrosine permease [Theobroma cacao]	XM_006485800.2/0.0/PREDICTED: Citrus sinensis tyrosine-specific transport protein 2-like (LOC102628165), mRNA	NA	tcc:18586386/2.5e-129/tyrosine-specific transport protein; K03834 tyrosine-specific transport protein	At5g19500/6.6e-27/[E] LSE0265 A Predicted tyrosine-specific transport protein	PF03222/3.4E-37/Tryptophan/tyrosine permease family	cellular_component:GO:0005887//integral component of plasma membrane;molecular_function:GO:0015173//aromatic amino acid transmembrane transporter activity;
CL1309.Contig2_All	1813	3.5	3.6	3.36	1.27	1.66	1.06	103.39	41.7552	-1.30807	2.128e-07	Down	XP_006436294.1/6.5e-197/hypothetical protein CICLE_v10031308mg [Citrus clementina] >XP_006485863.1 PREDICTED: tyrosine-specific transport protein 2-like [Citrus sinensis] >ESR49534.1 hypothetical protein CICLE_v10031308mg [Citrus clementina]	XM_006485800.2/0.0/PREDICTED: Citrus sinensis tyrosine-specific transport protein 2-like (LOC102628165), mRNA	NA	cit:102628165/9.7e-198/tyrosine-specific transport protein 2-like; K03834 tyrosine-specific transport protein	At5g19500/6.1e-41/[E] LSE0265 A Predicted tyrosine-specific transport protein	PTHR32195:SF10/7.0E-265/--	cellular_component:GO:0005887//integral component of plasma membrane;molecular_function:GO:0015173//aromatic amino acid transmembrane transporter activity;
CL1310.Contig3_All	1330	0.52	0.65	0.49	1.13	1.17	1.03	11.5678	24.5399	1.08502	0.0347862	Up	XP_016651772.1/7.4e-214/PREDICTED: beta-glucosidase BoGH3B-like isoform X2 [Prunus mume]	XM_002319115.2/0.0/Populus trichocarpa beta-D-glucan exohydrolase family protein (POPTR_0013s05230g) mRNA, complete cds	sp|Q9FLG1|BXL4_ARATH/4.0e-23/Beta-D-xylosidase 4 OS=Arabidopsis thaliana GN=BXL4 PE=1 SV=1	pmum:103339007/1.1e-214/beta-glucosidase BoGH3B-like isoform X1; K05349 beta-glucosidase [EC:3.2.1.21]	At5g20950/4.3e-193/[GRV] LSE0437 A Predicted beta-glucosidase	PF01915/9.8E-38/Glycosyl hydrolase family 3 C-terminal domain	NA
CL1312.Contig3_All	3422	0.27	0.22	0.48	1.26	0.57	0.55	18.8352	46.7872	1.31268	0.0150378	Up	XP_006485736.1/1.5e-263/PREDICTED: uridine-cytidine kinase C isoform X1 [Citrus sinensis] >KDO65602.1 hypothetical protein CISIN_1g006094mg [Citrus sinensis]	XM_006485673.2/0.0/PREDICTED: Citrus sinensis uridine-cytidine kinase C (LOC102611230), transcript variant X1, mRNA	sp|Q9FKS0|UKL1_ARATH/2.3e-06/Uridine kinase-like protein 1, chloroplastic OS=Arabidopsis thaliana GN=UKL1 PE=1 SV=1	csat:104774461/8.4e-09/uridine-cytidine kinase C-like; K00876 uridine kinase [EC:2.7.1.48]	At1g26190/3.5e-207/[TZ] KOG4203 Armadillo/beta-Catenin/plakoglobin	PTHR10285/2.2E-161/--	cellular_component:GO:0016021//integral component of membrane;molecular_function:GO:0005524//ATP binding;GO:0016301//kinase activity;
CL1312.Contig37_All	2759	0	0.06	0.31	0	0	0	4.31723	0.850031	-2.34452	0.0460988	Down	XP_006485736.1/1.2e-263/PREDICTED: uridine-cytidine kinase C isoform X1 [Citrus sinensis] >KDO65602.1 hypothetical protein CISIN_1g006094mg [Citrus sinensis]	XM_006485673.2/0.0/PREDICTED: Citrus sinensis uridine-cytidine kinase C (LOC102611230), transcript variant X1, mRNA	sp|Q9FKS0|UKL1_ARATH/1.6e-10/Uridine kinase-like protein 1, chloroplastic OS=Arabidopsis thaliana GN=UKL1 PE=1 SV=1	mtr:MTR_4g103620/7.7e-13/uridine kinase/uracil phosphoribosyltransferase; K00876 uridine kinase [EC:2.7.1.48]	At1g26190/2.9e-207/[TZ] KOG4203 Armadillo/beta-Catenin/plakoglobin	PTHR10285/2.2E-161/--	cellular_component:GO:0016021//integral component of membrane;molecular_function:GO:0005524//ATP binding;GO:0016301//kinase activity;
CL1312.Contig39_All	2983	0.21	0.05	0.19	0	0	0.03	6.10517	1.00391	-2.60439	0.0134213	Down	XP_006485736.1/1.7e-226/PREDICTED: uridine-cytidine kinase C isoform X1 [Citrus sinensis] >KDO65602.1 hypothetical protein CISIN_1g006094mg [Citrus sinensis]	XM_006485673.2/0.0/PREDICTED: Citrus sinensis uridine-cytidine kinase C (LOC102611230), transcript variant X1, mRNA	sp|Q9FKS0|UKL1_ARATH/1.8e-10/Uridine kinase-like protein 1, chloroplastic OS=Arabidopsis thaliana GN=UKL1 PE=1 SV=1	mtr:MTR_4g103620/8.3e-13/uridine kinase/uracil phosphoribosyltransferase; K00876 uridine kinase [EC:2.7.1.48]	At1g26190/3.0e-170/[TZ] KOG4203 Armadillo/beta-Catenin/plakoglobin	PTHR10285:SF76/7.9E-69/--	cellular_component:GO:0016021//integral component of membrane;molecular_function:GO:0005524//ATP binding;GO:0016301//kinase activity;
CL1312.Contig8_All	1829	0	0	0	0.4	0	0.62	1.03539	9.37693	3.17894	0.00273691	Up	KDO65606.1/1.9e-196/hypothetical protein CISIN_1g006094mg [Citrus sinensis] >KDO65607.1 hypothetical protein CISIN_1g006094mg [Citrus sinensis]	XM_006440793.1/0.0/Citrus clementina hypothetical protein (CICLE_v10019201mg) mRNA, complete cds	sp|Q9FKS0|UKL1_ARATH/2.6e-12/Uridine kinase-like protein 1, chloroplastic OS=Arabidopsis thaliana GN=UKL1 PE=1 SV=1	csat:104774461/1.1e-15/uridine-cytidine kinase C-like; K00876 uridine kinase [EC:2.7.1.48]	At1g73980/1.6e-182/[TZ] KOG4203 Armadillo/beta-Catenin/plakoglobin	PF00485/1.4E-22/Phosphoribulokinase / Uridine kinase family	molecular_function:GO:0005524//ATP binding;GO:0016301//kinase activity;
CL1312.Contig9_All	3015	0	0.38	0.07	0	0	0	6.03562	0.981237	-2.62083	0.0208359	Down	KDO65606.1/3.0e-85/hypothetical protein CISIN_1g006094mg [Citrus sinensis] >KDO65607.1 hypothetical protein CISIN_1g006094mg [Citrus sinensis]	XM_006440793.1/0.0/Citrus clementina hypothetical protein (CICLE_v10019201mg) mRNA, complete cds	NA	csat:104774461/1.0e-05/uridine-cytidine kinase C-like; K00876 uridine kinase [EC:2.7.1.48]	At1g73980/1.3e-75/[TZ] KOG4203 Armadillo/beta-Catenin/plakoglobin	PTHR10285/5.1E-76/--	cellular_component:GO:0016021//integral component of membrane;molecular_function:GO:0005524//ATP binding;GO:0016301//kinase activity;
CL1313.Contig2_All	1637	8.88	7.4	7.9	14.88	17.39	14.2	216.549	437.91	1.01594	9.52606e-16	Up	XP_002317246.2/2.6e-112/hypothetical protein POPTR_0011s04150g [Populus trichocarpa] >EEE97858.2 hypothetical protein POPTR_0011s04150g [Populus trichocarpa]	XM_006467843.2/0.0/PREDICTED: Citrus sinensis vesicle-associated protein 4-2 (LOC102630900), mRNA	sp|Q8VYN2|VAP42_ARATH/8.2e-111/Vesicle-associated protein 4-2 OS=Arabidopsis thaliana GN=PVA42 PE=1 SV=1	ghi:107950333/1.0e-20/uncharacterized protein LOC107950333 isoform X1; K01681 aconitate hydratase [EC:4.2.1.3]	At4g21450/1.6e-101/[U] KOG0439 VAMP-associated protein involved in inositol metabolism	PS50202/22.952/Major sperm protein (MSP) domain profile.	cellular_component:GO:0005789//endoplasmic reticulum membrane;
CL1319.Contig2_All	919	35.4	33.34	33.93	13.41	14.42	13.4	495.131	209.961	-1.23769	6.86998e-35	Down	XP_006442220.1/3.3e-96/hypothetical protein CICLE_v10022164mg [Citrus clementina] >ESR55460.1 hypothetical protein CICLE_v10022164mg [Citrus clementina]	XM_006442157.1/0.0/Citrus clementina hypothetical protein (CICLE_v10022164mg) mRNA, complete cds	sp|Q03666|GSTX4_TOBAC/1.7e-92/Probable glutathione S-transferase OS=Nicotiana tabacum PE=2 SV=1	cit:102631055/1.9e-96/probable glutathione S-transferase; K00799 glutathione S-transferase [EC:2.5.1.18]	At1g17180/7.8e-85/[O] KOG0406 Glutathione S-transferase	PS50404/23.979/Soluble glutathione S-transferase N-terminal domain profile.	biological_process:GO:0006749//glutathione metabolic process;GO:0009407//toxin catabolic process;cellular_component:GO:0005737//cytoplasm;molecular_function:GO:0004364//glutathione transferase activity;
CL1321.Contig1_All	2807	2.3	1.46	1.63	0.47	0.34	0.54	83.2815	22.1999	-1.90744	1.39047e-08	Down	XP_006472651.1/2.0e-224/PREDICTED: low affinity sulfate transporter 3 [Citrus sinensis] >XP_006472652.1 PREDICTED: low affinity sulfate transporter 3 [Citrus sinensis]	XM_006472589.2/0.0/PREDICTED: Citrus sinensis low affinity sulfate transporter 3 (LOC102620800), transcript variant X2, mRNA	sp|P53393|SUT3_STYHA/9.5e-200/Low affinity sulfate transporter 3 OS=Stylosanthes hamata GN=ST3 PE=2 SV=1	cit:102620800/2.9e-225/low affinity sulfate transporter 3; K17469 sulfate transporter 2, low-affinity	At5g10180/1.6e-181/[P] KOG0236 Sulfate/bicarbonate/oxalate exchanger SAT-1 and related transporters (SLC26 family)	PTHR11814/0.0/--	cellular_component:GO:0016021//integral component of membrane;molecular_function:GO:0008271//secondary active sulfate transmembrane transporter activity;
CL1321.Contig2_All	2748	0.54	1.39	1.52	0.42	0.29	0.34	51.2303	17.2988	-1.56632	0.00145809	Down	XP_006472651.1/2.5e-256/PREDICTED: low affinity sulfate transporter 3 [Citrus sinensis] >XP_006472652.1 PREDICTED: low affinity sulfate transporter 3 [Citrus sinensis]	XM_006472589.2/0.0/PREDICTED: Citrus sinensis low affinity sulfate transporter 3 (LOC102620800), transcript variant X2, mRNA	sp|P53393|SUT3_STYHA/3.4e-226/Low affinity sulfate transporter 3 OS=Stylosanthes hamata GN=ST3 PE=2 SV=1	cit:102620800/3.7e-257/low affinity sulfate transporter 3; K17469 sulfate transporter 2, low-affinity	At5g10180/2.3e-209/[P] KOG0236 Sulfate/bicarbonate/oxalate exchanger SAT-1 and related transporters (SLC26 family)	PTHR11814/9.4E-217/--	cellular_component:GO:0016021//integral component of membrane;molecular_function:GO:0008271//secondary active sulfate transmembrane transporter activity;
CL1325.Contig4_All	1733	1.56	1.19	1.87	11.52	10.82	12.1	44.1332	343.955	2.96229	6.05235e-64	Up	CBJ26843.1/2.0e-14/conserved unknown protein [Ectocarpus siliculosus]	NA	NA	ghi:107962493/2.3e-10/UPF0695 membrane protein C977.11/PB8B6.06c; K06199 fluoride exporter	NA	PTHR28259/1.3E-100/--	cellular_component:GO:0016021//integral component of membrane;molecular_function:GO:0016491//oxidoreductase activity;
CL1327.Contig1_All	489	1.22	1.11	0.38	0.17	0	0.13	5.51868	1.25255	-2.13945	0.0460258	Down	NA	NA	NA	NA	NA	PF01370/1.1E-4/NAD dependent epimerase/dehydratase family	NA
CL1327.Contig4_All	1150	3.29	3.33	3.07	0.52	0.95	0.92	58.8869	15.3215	-1.94239	6.34328e-08	Down	OEU11102.1/4.8e-12/hypothetical protein FRACYDRAFT_219997 [Fragilariopsis cylindrus CCMP1102]	NA	NA	lang:109362713/3.8e-06/protein NBR1 homolog; K17987 next to BRCA1 gene 1 protein	YHL028w/2.2e-07/[GO] KOG4157 beta-1,6-N-acetylglucosaminyltransferase, contains WSC domain	PTHR10366:SF262/7.3E-21/--	NA
CL1327.Contig5_All	923	3.13	2.84	2.41	1.09	1.24	1.19	39.8256	18.1474	-1.13394	0.00447046	Down	XP_012851129.1/7.8e-13/PREDICTED: GDSL esterase/lipase At3g48460-like [Erythranthe guttata]	NA	NA	pxb:103962243/1.2e-07/nuclear pore complex protein NUP62; K14306 nuclear pore complex protein Nup62	YHL028w/2.4e-09/[GO] KOG4157 beta-1,6-N-acetylglucosaminyltransferase, contains WSC domain	PF01370/7.2E-5/NAD dependent epimerase/dehydratase family	NA
CL1327.Contig6_All	1160	6.63	6.11	6.12	1.7	2.7	2.01	116.213	41.7763	-1.47601	1.24762e-09	Down	OEU11102.1/6.1e-15/hypothetical protein FRACYDRAFT_219997 [Fragilariopsis cylindrus CCMP1102]	NA	NA	lang:109362713/9.8e-10/protein NBR1 homolog; K17987 next to BRCA1 gene 1 protein	YNL283c/2.6e-08/[GO] KOG4157 beta-1,6-N-acetylglucosaminyltransferase, contains WSC domain	PF01370/1.0E-4/NAD dependent epimerase/dehydratase family	NA
CL1329.Contig1_All	2273	3.31	2.84	3.89	116.79	115.66	112.91	127.207	4592.2	5.17393	0	Up	ASW25865.1/2.1e-221/beta-fructofuranosidase, insoluble isoenzyme CWINV3 [Litchi chinensis]	KX981208.1/0.0/Litchi chinensis beta-fructofuranosidase, insoluble isoenzyme CWINV3 mRNA, complete cds	sp|Q43866|INV1_ARATH/4.4e-171/Beta-fructofuranosidase, insoluble isoenzyme CWINV1 OS=Arabidopsis thaliana GN=CWINV1 PE=1 SV=1	cit:102630080/1.3e-210/beta-fructofuranosidase, insoluble isoenzyme CWINV1; K01193 beta-fructofuranosidase [EC:3.2.1.26]	At3g13790/1.0e-170/[G] KOG0228 Beta-fructofuranosidase (invertase)	PF00251/1.6E-62/Glycosyl hydrolases family 32 N-terminal domain	biological_process:GO:0005975//carbohydrate metabolic process;molecular_function:GO:0004553//hydrolase activity, hydrolyzing O-glycosyl compounds;
CL1334.Contig1_All	526	7.88	6.75	7.07	16.66	17.54	16.79	55.6838	137.347	1.30249	6.69437e-11	Up	BAK00460.1/2.9e-33/predicted protein [Hordeum vulgare subsp. vulgare]	NA	sp|Q9ZRS8|RL37A_PSEMZ/7.6e-34/60S ribosomal protein L37a OS=Pseudotsuga menziesii GN=RPL37A PE=3 SV=1	ppp:PHYPADRAFT_62189/2.8e-33/hypothetical protein; K02921 large subunit ribosomal protein L37Ae	YJR094w-a/2.7e-34/[J] KOG0402 60S ribosomal protein L37	NA	biological_process:GO:0006412//translation;cellular_component:GO:0005840//ribosome;molecular_function:GO:0003735//structural constituent of ribosome;
CL1334.Contig2_All	596	7.78	8.48	7.54	18.54	18.71	20.38	71.0968	179.94	1.33966	1.44363e-14	Up	BAK00460.1/3.4e-33/predicted protein [Hordeum vulgare subsp. vulgare]	NA	sp|Q9ZRS8|RL37A_PSEMZ/8.6e-34/60S ribosomal protein L37a OS=Pseudotsuga menziesii GN=RPL37A PE=3 SV=1	ppp:PHYPADRAFT_62189/3.2e-33/hypothetical protein; K02921 large subunit ribosomal protein L37Ae	YJR094w-a/3.1e-34/[J] KOG0402 60S ribosomal protein L37	NA	biological_process:GO:0006412//translation;cellular_component:GO:0005840//ribosome;molecular_function:GO:0003735//structural constituent of ribosome;
CL1343.Contig1_All	1744	3.11	5.2	3.81	15.07	10.75	19.02	117.09	449.806	1.94168	2.46482e-17	Up	XP_006473736.1/3.8e-226/PREDICTED: probable alpha-amylase 2 [Citrus sinensis] >KDO84997.1 hypothetical protein CISIN_1g014892mg [Citrus sinensis]	XM_006473673.2/0.0/PREDICTED: Citrus sinensis probable alpha-amylase 2 (LOC102625798), mRNA	sp|Q8LFG1|AMY2_ARATH/5.3e-217/Probable alpha-amylase 2 OS=Arabidopsis thaliana GN=AMY2 PE=2 SV=1	cit:102625798/5.6e-227/probable alpha-amylase 2; K01176 alpha-amylase [EC:3.2.1.1]	At1g76130/1.2e-216/[G] KOG0471 Alpha-amylase	SM00642/1.6E-32/Alpha-amylase domain	biological_process:GO:0005975//carbohydrate metabolic process;molecular_function:GO:0004556//alpha-amylase activity;GO:0005509//calcium ion binding;GO:0103025//alpha-amylase activity (releasing maltohexaose);
CL1343.Contig3_All	1753	25.93	25.17	25.17	49.19	50.83	51.07	733.656	1532.94	1.06313	1.35289e-85	Up	XP_006473736.1/1.9e-225/PREDICTED: probable alpha-amylase 2 [Citrus sinensis] >KDO84997.1 hypothetical protein CISIN_1g014892mg [Citrus sinensis]	XM_006473673.2/0.0/PREDICTED: Citrus sinensis probable alpha-amylase 2 (LOC102625798), mRNA	sp|Q8LFG1|AMY2_ARATH/1.2e-216/Probable alpha-amylase 2 OS=Arabidopsis thaliana GN=AMY2 PE=2 SV=1	cit:102625798/2.8e-226/probable alpha-amylase 2; K01176 alpha-amylase [EC:3.2.1.1]	At1g76130/2.8e-216/[G] KOG0471 Alpha-amylase	PF07821/1.5E-21/Alpha-amylase C-terminal beta-sheet domain	biological_process:GO:0005975//carbohydrate metabolic process;molecular_function:GO:0004556//alpha-amylase activity;GO:0005509//calcium ion binding;GO:0103025//alpha-amylase activity (releasing maltohexaose);
CL1344.Contig1_All	1550	0.58	0.6	0.44	2.91	1.98	2.21	13.806	62.2926	2.17377	3.23147e-09	Up	XP_021857995.1/7.2e-11/flocculation protein FLO11-like [Spinacia oleracea]	NA	NA	mdm:103439016/7.2e-08/nuclear pore complex protein NUP62; K14306 nuclear pore complex protein Nup62	SPAPB1E7.04c/3.7e-10/[M] KOG4701 Chitinase	PS50845/19.414/Reticulon domain profile.	NA
CL1344.Contig2_All	1549	2.43	2.08	2.23	0.58	0.56	0.48	56.4168	14.9637	-1.91466	4.67591e-08	Down	XP_020395843.1/6.1e-10/uncharacterized protein DDB_G0271670, partial [Zea mays]	NA	NA	obr:102719630/4.6e-07/nuclear pore complex protein NUP62; K14306 nuclear pore complex protein Nup62	YDR233c/1.7e-15/[U] KOG1792 Reticulon	PS50845/16.646/Reticulon domain profile.	NA
CL1345.Contig5_All	2684	0	0	0	0.07	0.65	1.52	1.29897	33.6987	4.69726	3.10185e-07	Up	KDO52215.1/3.1e-227/hypothetical protein CISIN_1g009109mg [Citrus sinensis]	XM_006464867.2/0.0/PREDICTED: Citrus sinensis aldehyde dehydrogenase family 3 member H1-like (LOC102615535), mRNA	sp|Q8W033|AL3I1_ARATH/3.8e-198/Aldehyde dehydrogenase family 3 member I1, chloroplastic OS=Arabidopsis thaliana GN=ALDH3I1 PE=1 SV=2	cit:102615535/6.0e-228/aldehyde dehydrogenase family 3 member H1-like; K00128 aldehyde dehydrogenase (NAD+) [EC:1.2.1.3]	At1g44170/2.6e-181/[C] KOG2456 Aldehyde dehydrogenase	PS00070/-/Aldehyde dehydrogenases cysteine active site.	biological_process:GO:0006081//cellular aldehyde metabolic process;molecular_function:GO:0004030//aldehyde dehydrogenase [NAD(P)+] activity;
CL1348.Contig7_All	3705	0.62	0.35	0.2	1.87	0.89	0.64	25.4737	72.9258	1.51742	0.00465957	Up	XP_021600454.1/0.0e+00/probable sucrose-phosphate synthase 4 [Manihot esculenta] >OAY23815.1 hypothetical protein MANES_18G109400 [Manihot esculenta]	XM_006478278.2/0.0/PREDICTED: Citrus sinensis probable sucrose-phosphate synthase 4 (LOC102624502), mRNA	sp|F4JLK2|SPSA4_ARATH/6.5e-289/Probable sucrose-phosphate synthase 4 OS=Arabidopsis thaliana GN=SPS4 PE=1 SV=1	hbr:110646478/0.0e+00/probable sucrose-phosphate synthase 4; K00696 sucrose-phosphate synthase [EC:2.4.1.14]	At4g10120/1.9e-283/[M] KOG0853 Glycosyltransferase	PF00534/2.0E-19/Glycosyl transferases group 1	NA
CL135.Contig1_All	1230	2.48	3.38	2.35	0.2	0.23	0	53.1365	3.5095	-3.92037	9.47333e-13	Down	XP_002518806.1/3.2e-147/PREDICTED: tobamovirus multiplication protein 3 [Ricinus communis] >EEF43731.1 virion binding protein, putative [Ricinus communis]	XM_006479080.2/0.0/PREDICTED: Citrus sinensis tobamovirus multiplication protein 3 (LOC102629578), transcript variant X2, mRNA	sp|Q402F3|TOM3_TOBAC/2.7e-143/Tobamovirus multiplication protein 3 OS=Nicotiana tabacum GN=TOM3 PE=1 SV=1	NA	NA	PF06454/7.1E-146/Protein of unknown function (DUF1084)	cellular_component:GO:0016021//integral component of membrane;
CL135.Contig14_All	1638	5.56	4.53	5.09	10.09	8.94	10.36	135.768	276.82	1.02781	1.25626e-12	Up	XP_002518806.1/4.3e-147/PREDICTED: tobamovirus multiplication protein 3 [Ricinus communis] >EEF43731.1 virion binding protein, putative [Ricinus communis]	XM_006479080.2/0.0/PREDICTED: Citrus sinensis tobamovirus multiplication protein 3 (LOC102629578), transcript variant X2, mRNA	sp|Q402F3|TOM3_TOBAC/3.7e-143/Tobamovirus multiplication protein 3 OS=Nicotiana tabacum GN=TOM3 PE=1 SV=1	NA	NA	PF06454/4.5E-146/Protein of unknown function (DUF1084)	cellular_component:GO:0016021//integral component of membrane;
CL1354.Contig1_All	873	1.84	1.37	0.9	0.14	0.28	0.28	17.7061	3.9641	-2.15918	0.00155196	Down	XP_019173524.1/1.8e-11/PREDICTED: hornerin-like, partial [Ipomoea nil]	AK108354.1/0.0/Oryza sativa Japonica Group cDNA clone:002-142-C03, full insert sequence	sp|Q9SHF2|AGO3_ARATH/3.3e-10/Protein argonaute 3 OS=Arabidopsis thaliana GN=AGO3 PE=3 SV=1	cre:CHLREDRAFT_33956/2.3e-19/VIG1; vasa intronic gene; K13199 plasminogen activator inhibitor 1 RNA-binding protein	At1g31290/7.8e-10/[J] KOG1041 Translation initiation factor 2C (eIF-2C) and related proteins	NA	cellular_component:GO:0016021//integral component of membrane;
CL1354.Contig2_All	1442	2.4	2.14	2.17	0.41	0.16	0.48	51.4411	9.05952	-2.50542	2.67247e-09	Down	XP_001694669.1/7.9e-28/vasa intronic gene [Chlamydomonas reinhardtii] >EDP02253.1 vasa intronic gene [Chlamydomonas reinhardtii]	NA	sp|Q9FPQ6|GP1_CHLRE/2.2e-14/Vegetative cell wall protein gp1 OS=Chlamydomonas reinhardtii GN=GP1 PE=1 SV=1	cre:CHLREDRAFT_33956/1.2e-28/VIG1; vasa intronic gene; K13199 plasminogen activator inhibitor 1 RNA-binding protein	Hs4505285/1.7e-09/[WV] KOG1216 von Willebrand factor and related coagulation proteins	NA	cellular_component:GO:0016021//integral component of membrane;
CL1357.Contig10_All	531	1.78	1.15	1.75	0	0	0.49	11.1952	2.04825	-2.45042	0.0057874	Down	BAK06189.1/9.5e-64/predicted protein [Hordeum vulgare subsp. vulgare]	AK357554.1/0.0/Hordeum vulgare subsp. vulgare mRNA for predicted protein, complete cds, clone: NIASHv1056H03	sp|Q9LR33|R27A2_ARATH/2.7e-47/60S ribosomal protein L27a-2 OS=Arabidopsis thaliana GN=RPL27AB PE=2 SV=1	mng:MNEG_6045/5.2e-51/60S ribosomal protein L27a-3; K02900 large subunit ribosomal protein L27Ae	YGL103w/4.0e-57/[J] KOG1742 60s ribosomal protein L15/L27	PF00828/1.1E-20/Ribosomal protein L18e/L15	biological_process:GO:0006412//translation;cellular_component:GO:0015934//large ribosomal subunit;molecular_function:GO:0003735//structural constituent of ribosome;
[truncated: 11,202 more rows]
