# Supplementary material for: Leaf Coloration in Acer palmatum Is Associated with a Positive Regulator ApMYB1 with Potential for Breeding Color-Leafed Plants
Source: MDPI journal article supplement (doi:10.3390/plants11060759), 2022-03-12
Supplement: s1 [file s1]

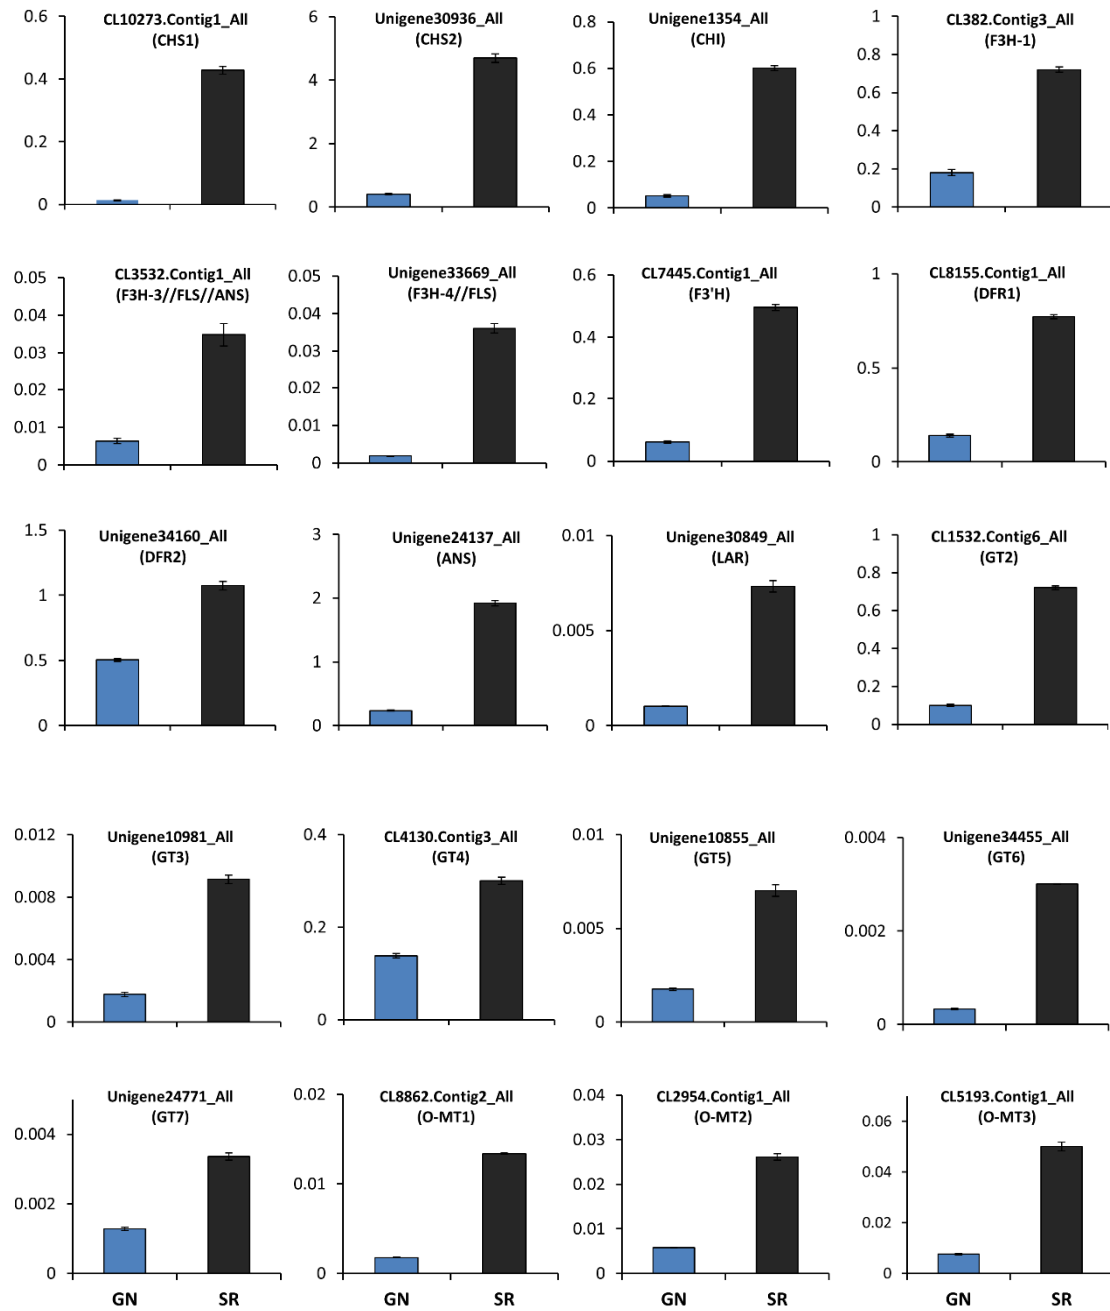

**Supplemental Figure S1** Expression levels of selected anthocyanin biosynthesis related transcripts measured by qPCR. These genes were identified through RNA-Seq as up-regulated with  $\geq 2$  fold in SR compared to GN leaves and selected based on annotations containing names of target enzymes in anthocyanin biosynthesis pathway.

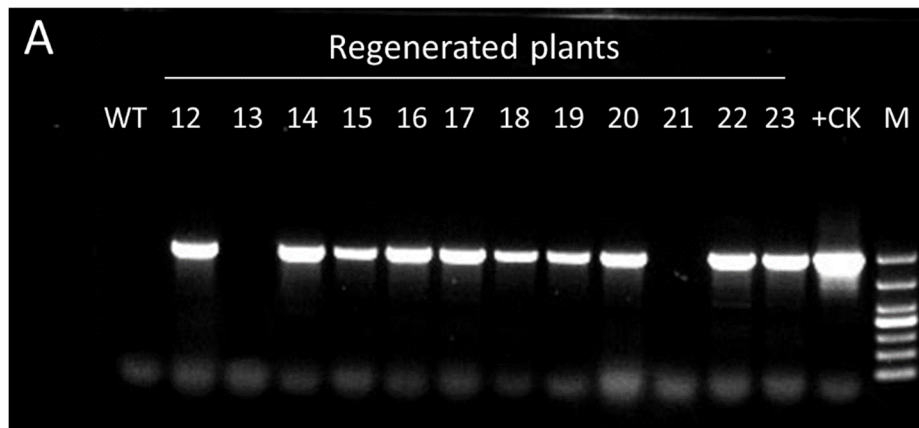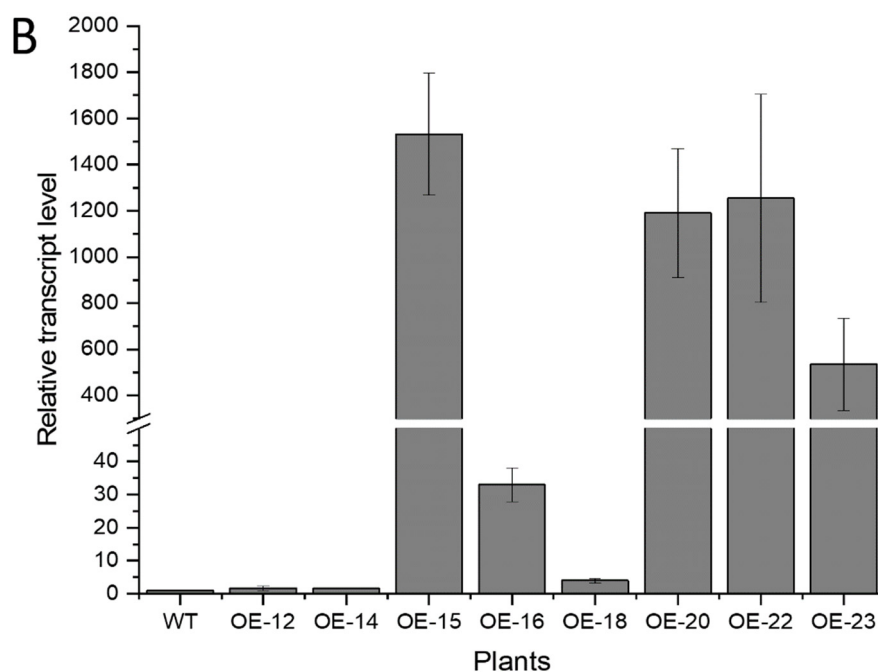

**Supplemental Figure S2** Identification of transgenic tobacco T1 plants overexpressing *ApMYB1*. (A) PCR using genomic DNA of twelve regenerated tobacco T1 plants, WT (negative control) and construct plasmid (positive control) as templates. (B) Relative transcript levels of *ApMYB1* in WT and 8 transgenic positive T1 plants measured by qPCR. T1 plants of OE-20 and OE-22 were grown for T2 seed production and phenotypic observation was performed on T2 plants. The T1 plant of OE-15 was dead during growing.

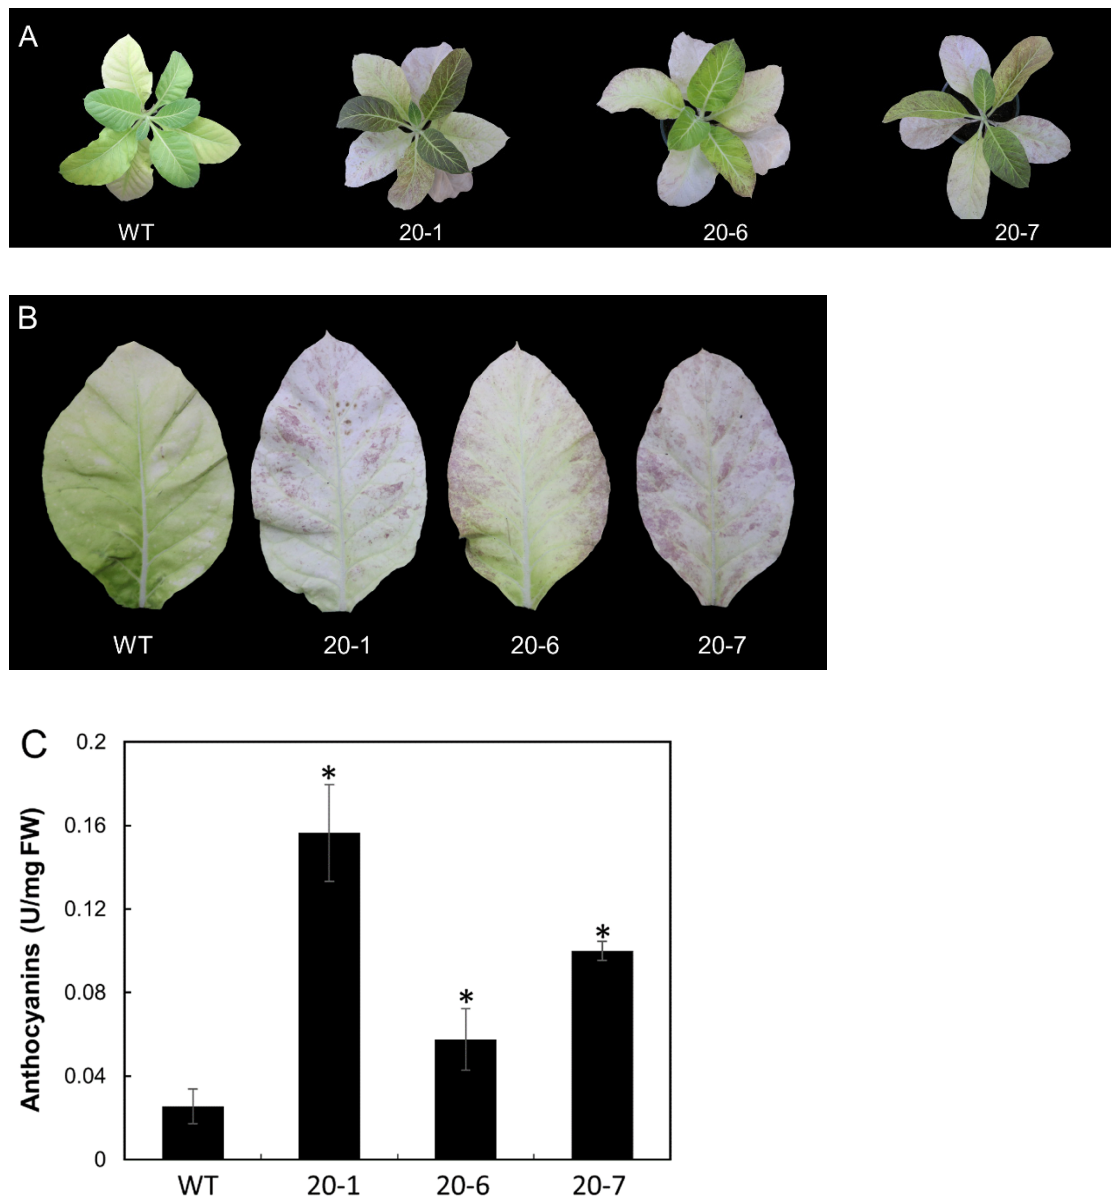

**Supplemental Figure S3** Promoted anthocyanin biosynthesis in transgenic tobacco T2 plants (OE-20). (A) phenotype of WT and three T2 plants of transgenic line #20. (B) phenotype of representative leaves detached from WT and three T2 plants of transgenic line #20. (C) relative content of anthocyanins in leaves of WT and three T2 plants of transgenic line #20. Values in C are means  $\pm$  SD ( $n=3$ ). Asterisks indicate significant difference between various transgenic leaves and WT at  $p < 0.05$ , using the Student's t-test.
