# Supplementary material for: Leaf Coloration in Acer palmatum Is Associated with a Positive Regulator ApMYB1 with Potential for Breeding Color-Leafed Plants
Source: Plants (Basel). 2022 Mar 12;11(6):759. doi: 10.3390/plants11060759 (PMC8955597; doi:10.3390/plants11060759)
Supplement: Supplementary file 1 [file plants-11-00759-s001.zip]

Archive with 7 entries (7 files):
- Sun et al-Supplementary Figures S1-S3.pdf
- Suppl Table S1-Differentially expressed transcripts.xlsx
- Suppl Table S2-KEGG pathway enrichment analysis.xlsx
- Suppl Table S3-DETs in anthocyanin biosynthesis.xlsx
- Suppl Table S4-DETs encoding putative TFs.xlsx
- Suppl Table S5-Sequences for alignment and of ApMYB1.xlsx
- Suppl Table S6-Primers used in this work.xlsx
