# Supplementary material for: Leaf Coloration in Acer palmatum Is Associated with a Positive Regulator ApMYB1 with Potential for Breeding Color-Leafed Plants
Source: Plants (Basel). 2022 Mar 12;11(6):759. doi: 10.3390/plants11060759 (PMC8955597; doi:10.3390/plants11060759)
Supplement: Supplementary file 1 [file plants-11-00759-s001.zip › Suppl Table S2-KEGG pathway enrichment analysis.xlsx]

## Sheet: Sheet1
KEGG pathway	Up-regulated	Down-regulated	Total number of DETs
Metabolic pathways	1025	1099	2124
Biosynthesis of secondary metabolites	596	709	1305
Ribosome	76	874	950
Carbon metabolism	120	270	390
RNA transport	164	211	375
Plant-pathogen interaction	195	161	356
Biosynthesis of amino acids	114	221	335
Phenylpropanoid biosynthesis	126	138	264
Purine metabolism	110	137	247
MAPK signaling pathway - plant	141	91	232
Pyrimidine metabolism	103	114	217
Spliceosome	122	92	214
Protein processing in ER	92	114	206
Glycolysis / Gluconeogenesis	69	135	204
Endocytosis	91	92	183
Oxidative phosphorylation	51	131	182
RNA polymerase	78	86	164
Starch and sucrose metabolism	79	79	158
Plant hormone signal transduction	70	68	138
Pentose phosphate pathway	26	98	124
Glyoxylate and dicarboxylate metabolism	51	71	122
Peroxisome	49	69	118
RNA degradation	44	71	115
Carbon fixation in photosynthetic organisms	16	95	111
Amino sugar and nucleotide sugar metabolism	64	45	109
mRNA surveillance pathway	58	47	105
Cysteine and methionine metabolism	55	47	102
Glutathione metabolism	52	49	101
Pentose and glucuronate interconversions	58	36	94
Galactose metabolism	57	35	92
Fatty acid metabolism	46	44	90
Ribosome biogenesis in eukaryotes	58	28	86
2-Oxocarboxylic acid metabolism	30	52	82
Pyruvate metabolism	34	44	78
Ubiquitin mediated proteolysis	53	23	76
Citrate cycle (TCA cycle)	21	54	75
Glycerolipid metabolism	43	32	75
Biosynthesis of unsaturated fatty acids	38	36	74
Tryptophan metabolism	45	28	73
Glycerophospholipid metabolism	48	24	72
Fructose and mannose metabolism	20	49	69
Glycine, serine and threonine metabolism	34	33	67
Alanine, aspartate and glutamate metabolism	37	28	65
ABC transporters	35	25	60
Ascorbate and aldarate metabolism	44	13	57
Tropane, piperidine and pyridine alkaloid biosynthesis	29	28	57
alpha-Linolenic acid metabolism	37	20	57
Arginine and proline metabolism	40	16	56
Phenylalanine metabolism	40	13	53
Fatty acid biosynthesis	25	24	49
Carotenoid biosynthesis	26	22	48
Inositol phosphate metabolism	31	16	47
Sulfur metabolism	26	20	46
Tyrosine metabolism	26	19	45
beta-Alanine metabolism	28	17	45
Biotin metabolism	23	22	45
Aminoacyl-tRNA biosynthesis	17	27	44
Phenylalanine, tyrosine and tryptophan biosynthesis	24	20	44
Proteasome	32	10	42
Selenocompound metabolism	18	24	42
Photosynthesis	6	36	42
Phosphatidylinositol signaling system	27	14	41
Cyanoamino acid metabolism	13	27	40
Porphyrin and chlorophyll metabolism	11	29	40
Phagosome	21	17	38
Valine, leucine and isoleucine degradation	24	14	38
Flavonoid biosynthesis	29	9	38
Nitrogen metabolism	21	13	34
Fatty acid degradation	25	8	33
Arginine biosynthesis	14	18	32
Nucleotide excision repair	17	14	31
Basal transcription factors	18	13	31
Sphingolipid metabolism	24	6	30
Lysine degradation	18	12	30
Ether lipid metabolism	26	4	30
Valine, leucine and isoleucine biosynthesis	13	16	29
Folate biosynthesis	13	16	29
Circadian rhythm - plant	14	14	28
Isoquinoline alkaloid biosynthesis	17	11	28
Homologous recombination	11	16	27
Steroid biosynthesis	17	10	27
Histidine metabolism	7	19	26
DNA replication	12	13	25
Other glycan degradation	7	18	25
Pantothenate and CoA biosynthesis	7	18	25
Propanoate metabolism	10	14	24
Arachidonic acid metabolism	16	8	24
One carbon pool by folate	10	14	24
Protein export	7	16	23
Butanoate metabolism	12	11	23
Riboflavin metabolism	11	12	23
Ubiquinone and other terpenoid-quinone biosynthesis	11	11	22
Linoleic acid metabolism	15	7	22
Mismatch repair	9	11	20
Nicotinate and nicotinamide metabolism	9	11	20
Sesquiterpenoid and triterpenoid biosynthesis	18	2	20
Vitamin B6 metabolism	14	6	20
N-Glycan biosynthesis	6	12	18
Terpenoid backbone biosynthesis	9	8	17
Isoflavonoid biosynthesis	6	11	17
Fatty acid elongation	12	5	17
Cutin, suberine and wax biosynthesis	10	5	15
Monobactam biosynthesis	5	10	15
Phosphonate and phosphinate metabolism	12	1	13
Thiamine metabolism	5	8	13
Indole alkaloid biosynthesis	3	10	13
Stilbenoid, diarylheptanoid and gingerol biosynthesis	12	1	13
Lysine biosynthesis	5	8	13
Photosynthesis - antenna proteins	0	13	13
Glycosaminoglycan degradation	8	4	12
Diterpenoid biosynthesis	8	4	12
Base excision repair	4	7	11
Other types of O-glycan biosynthesis	7	4	11
Autophagy - other	9	1	10
Glycosphingolipid biosynthesis - ganglio series	7	3	10
Anthocyanin biosynthesis	2	8	10
Zeatin biosynthesis	5	4	9
Cholesterol metabolism	3	5	8
C5-Branched dibasic acid metabolism	4	3	7
Sulfur relay system	3	4	7
Taurine and hypotaurine metabolism	3	4	7
Monoterpenoid biosynthesis	3	4	7
SNARE interactions in vesicular transport	6	0	6
Glycosphingolipid biosynthesis - globo and isoglobo series	5	1	6
Brassinosteroid biosynthesis	2	3	5
Glycosylphosphatidylinositol (GPI)-anchor biosynthesis	1	3	4
Flavone and flavonol biosynthesis	2	2	4
Betalain biosynthesis	1	3	4
Synthesis and degradation of ketone bodies	2	1	3
Glucosinolate biosynthesis	1	2	3
Lipoic acid metabolism	1	0	1
Benzoxazinoid biosynthesis	0	1	1
Mannose type O-glycan biosynthesis	1	0	1
Glycosphingolipid biosynthesis - lacto and neolacto series	1	0	1
