# Supplementary material for: Leaf Coloration in Acer palmatum Is Associated with a Positive Regulator ApMYB1 with Potential for Breeding Color-Leafed Plants
Source: Plants (Basel). 2022 Mar 12;11(6):759. doi: 10.3390/plants11060759 (PMC8955597; doi:10.3390/plants11060759)
Supplement: Supplementary file 1 [file plants-11-00759-s001.zip › Suppl Table S3-DETs in anthocyanin biosynthesis.xlsx]

## Sheet: Sheet1
putative Flavonoid/anthocyanin biosynthesis genes
Targeted Annotation and GeneID	Length	Expression in GN	Expression in SR	Fold Change	log2[FoldChange(SR/GN)]	Padj	Up/Down-Regulation	Pvalue
Chalcone synthase (CHS)
CL6557.Contig2_All	981	10.9008	50.1676	4.60219	2.20232	4.58432e-08	Up	3.92302e-09
CL10273.Contig1_All	1561	13.3549	58.5663	4.38539	2.1327	1.19562e-06	Up	1.19881e-07
CL10273.Contig2_All	1544	29.408	81.93	2.78598	1.47818	2.1578e-07	Up	1.98951e-08
CL6557.Contig1_All	637	7.88625	25.7277	3.26234	1.70591	0.00118816	Up	0.00019119
CL3042.Contig2_All	1735	27.5563	105.822	3.8402	1.94118	4.44636e-13	Up	2.52597e-14
Unigene3174_All	1037	13.0441	35.534	2.72415	1.44581	0.00190546	Up	0.00032046
Unigene30936_All	1660	8991.95	30827.2	3.42831	1.7775	0	Up	0
Chalcone isomerase (CHI)
Unigene1354_All	1034	293.609	867.487	2.95457	1.56295	1.52663e-76	Up	1.61605e-78
Unigene21399_All	1253	11.3974	34.8273	3.05572	1.61151	0.000271272	Up	3.84113e-05
Flavanone 3-hydroxylase (F3H)
CL382.Contig2_All	913	33.9498	97.2992	2.86597	1.51903	9.9852e-09	Up	7.9989e-10
CL382.Contig3_All	1457	2817.53	6179.57	2.19325	1.13307	1.59187e-274	Up	3.83225e-277
Unigene33621_All	651	16.1635	35.594	2.20212	1.13889	0.0121718	Up	0.00248481
Unigene33669_All	1378	21.7341	72.4677	3.33429	1.73738	1.49937e-08	Up	1.22506e-09
CL9324.Contig3_All	1434	38.1054	91.7145	2.40686	1.26715	0.023357	Up	0.00518807
CL382.Contig1_All	890	33.8777	102.01	3.01112	1.5903	6.11459e-11	Up	4.04462e-12
CL3532.Contig1_All	1001	43.4231	100.082	2.30481	1.20465	2.16807e-07	Up	1.99922e-08
Dihydroflavonol 4-reductase (DFR)
CL5067.Contig2_All	1262	101.868	490.706	4.81708	2.26816	4.45206e-74	Up	4.84306e-76
Unigene34160_All	1462	1865.41	4823.12	2.58556	1.37048	0	Up	0
Unigene15055_All	1046	5.01675	17.2709	3.44264	1.78351	0.00642839	Up	0.00121961
CL8155.Contig1_All	1470	684.173	2368.5	3.46184	1.79154	1.04066e-212	Up	3.5706e-215
CL8155.Contig3_All	1141	144.571	478.849	3.3122	1.72779	9.1608e-31	Up	2.37437e-32
Flavonol synthase (FLS)
Unigene33669_All	1378	21.7341	72.4677	3.33429	1.73738	1.49937e-08	Up	1.22506e-09
CL9324.Contig3_All	1434	38.1054	91.7145	2.40686	1.26715	0.023357	Up	0.00518807
CL3532.Contig1_All	1001	43.4231	100.082	2.30481	1.20465	2.16807e-07	Up	1.99922e-08
Anthocyanidin synthase/leucocyanidin oxygenase (ANS/LDOX)
Unigene24137_All	1542	1912.33	6498.75	3.39835	1.76483	0	Up	0
CL3532.Contig1_All	1001	43.4231	100.082	2.30481	1.20465	2.16807e-07	Up	1.99922e-08
Leucocyanidin reductase (LAR)
Unigene30849_All	1182	12.1516	61.9322	5.09663	2.34954	3.19854e-11	Up	2.07328e-12
Flavanoid 3'-hydroxylase (F3'H)
CL7445.Contig1_All	2008	851.973	3040.78	3.56911	1.83556	5.14533e-300	Up	1.10555e-302
Glucosyltransferase
Unigene13921_All	2754	81.7937	334.484	4.08936	2.03187	1.05858e-28	Up	2.93424e-30
CL6118.Contig3_All	3078	137.394	387.982	2.82386	1.49767	4.34838e-36	Up	9.70025e-38
Unigene10981_All	2372	15.1178	106.545	7.04765	2.81714	2.1401e-21	Up	7.74734e-23
Unigene10566_All	2803	46.1253	132.785	2.87878	1.52546	5.6267e-12	Up	3.43769e-13
CL289.Contig3_All	1793	89.564	325.872	3.63842	1.86331	3.45977e-20	Up	1.32603e-21
Unigene39725_All	750	16.2252	49.5772	3.05557	1.61144	1.03554e-05	Up	1.17366e-06
CL592.Contig2_All	696	7.02675	21.814	3.10443	1.63433	0.0117115	Up	0.0023795
Unigene13761_All	1171	76.9483	180.826	2.34997	1.23264	4.17692e-11	Up	2.72579e-12
Unigene2482_All	400	1.48551	6.20193	4.17496	2.06176	0.039782	Up	0.00958826
CL1532.Contig6_All	1792	84.8127	938.717	11.0681	3.46834	3.55609e-165	Up	1.65617e-167
Unigene20181_All	3727	37.1176	97.6471	2.63075	1.39547	5.39664e-08	Up	4.64852e-09
Unigene11155_All	991	14.5819	41.1534	2.82222	1.49683	0.000210371	Up	2.92224e-05
CL1532.Contig7_All	2090	147.034	1633.82	11.1119	3.47403	0	Up	0
Unigene32815_All	1178	6.92944	26.3857	3.80777	1.92895	0.000160068	Up	2.17901e-05
CL4130.Contig3_All	2034	321.013	846.322	2.63641	1.39857	1.80216e-62	Up	2.33954e-64
Unigene26942_All	304	19.2705	38.6739	2.0069	1.00497	0.0106294	Up	0.0021344
Unigene21388_All	1027	1.97561	18.8166	9.52445	3.25164	1.02961e-05	Up	1.16648e-06
Unigene24771_All	1262	6.93413	23.3194	3.36299	1.74974	0.00190286	Up	0.000319937
CL606.Contig3_All	1450	17.6637	48.5692	2.74967	1.45926	0.000804037	Up	0.000124468
CL592.Contig5_All	1776	11.5653	70.2834	6.07708	2.60338	2.53422e-13	Up	1.4146e-14
CL1127.Contig1_All	1416	231.874	489.193	2.10974	1.07706	1.07386e-19	Up	4.19429e-21
CL1127.Contig6_All	1633	426.982	925.077	2.16655	1.1154	3.19064e-43	Up	5.88645e-45
CL1532.Contig3_All	2063	242.26	3169.29	13.0822	3.70953	0	Up	0
Unigene1372_All	1138	768.699	4290.87	5.58199	2.48078	0	Up	0
CL4219.Contig1_All	2368	115.7	264.585	2.28683	1.19335	1.03287e-06	Up	1.02854e-07
Unigene30233_All	3244	301.798	989.464	3.27856	1.71306	4.98871e-102	Up	3.83302e-104
CL4751.Contig1_All	672	1.8646	8.48867	4.55255	2.18667	0.0178374	Up	0.00382721
CL1532.Contig4_All	1943	68.3254	350.176	5.12512	2.35759	2.43929e-38	Up	5.14239e-40
Unigene10855_All	1947	50.2317	116.807	2.32536	1.21745	8.65026e-08	Up	7.63125e-09
Unigene34455_All	1536	4.05318	65.3689	16.1278	4.01148	4.74833e-15	Up	2.35619e-16
O-methyltransferase
Unigene23615_All	1361	16.4944	43.6337	2.64536	1.40347	0.000216402	Up	3.01064e-05
CL6469.Contig1_All	1300	5087.25	25663.3	5.04463	2.33475	0	Up	0
Unigene29822_All	1040	64.4595	171.317	2.65774	1.4102	3.40167e-13	Up	1.91488e-14
Unigene26514_All	679	22.7459	100.508	4.41873	2.14363	5.09922e-15	Up	2.53834e-16
CL10631.Contig6_All	1365	20.3874	49.2383	2.41513	1.2721	0.00097279	Up	0.000153722
CL8862.Contig2_All	1244	20.4743	69.3483	3.38708	1.76004	5.52738e-08	Up	4.76859e-09
Unigene29823_All	1012	38.7974	109.625	2.82558	1.49855	4.33017e-09	Up	3.35773e-10
CL2954.Contig1_All	1677	16.7266	35.9253	2.1478	1.10286	0.00802184	Up	0.00156028
CL8862.Contig3_All	1368	31.8252	100.399	3.15471	1.65751	1.29947e-08	Up	1.05383e-09
Unigene31881_All	577	2.12014	8.86781	4.18264	2.06441	0.0174221	Up	0.0037281
Unigene3402_All	1358	23.6743	53.4924	2.25952	1.17602	0.00430933	Up	0.000783496
Unigene20188_All	1247	9.23272	39.073	4.23201	2.08134	2.11274e-06	Up	2.18682e-07
Unigene26742_All	2089	23.5274	52.7469	2.24194	1.16475	0.000738732	Up	0.000113362
CL3253.Contig1_All	497	6.54331	20.0291	3.06101	1.61401	0.00487908	Up	0.000899929
CL8862.Contig1_All	1311	55.8886	184.543	3.30198	1.72333	3.10006e-16	Up	1.44309e-17
CL7622.Contig1_All	1206	203.162	600.213	2.95436	1.56285	1.12763e-45	Up	1.96748e-47
CL5193.Contig1_All	1283	503.506	3638.5	7.22632	2.85326	0	Up	0
