# Supplementary material for: Leaf Coloration in Acer palmatum Is Associated with a Positive Regulator ApMYB1 with Potential for Breeding Color-Leafed Plants
Source: Plants (Basel). 2022 Mar 12;11(6):759. doi: 10.3390/plants11060759 (PMC8955597; doi:10.3390/plants11060759)
Supplement: Supplementary file 1 [file plants-11-00759-s001.zip › Suppl Table S4-DETs encoding putative TFs.xlsx]

## Sheet: Sheet1
Gene_id	TF_family
Unigene21045_All	ABI3VP1
Unigene29875_All	ABI3VP1
Unigene5428_All	ABI3VP1
Unigene523_All	ABI3VP1
Unigene26830_All	ABI3VP1
CL6581.Contig1_All	ABI3VP1
CL930.Contig1_All	ABI3VP1
CL930.Contig2_All	ABI3VP1
CL6581.Contig2_All	ABI3VP1
Unigene13899_All	Alfin-like
CL2129.Contig11_All	AP2-EREBP
CL9671.Contig2_All	AP2-EREBP
CL4561.Contig1_All	AP2-EREBP
Unigene21239_All	AP2-EREBP
CL2129.Contig8_All	AP2-EREBP
CL2129.Contig3_All	AP2-EREBP
CL9221.Contig3_All	AP2-EREBP
CL2129.Contig10_All	AP2-EREBP
Unigene30330_All	AP2-EREBP
CL2129.Contig12_All	AP2-EREBP
CL4561.Contig4_All	AP2-EREBP
Unigene1992_All	AP2-EREBP
CL2129.Contig2_All	AP2-EREBP
Unigene33680_All	AP2-EREBP
CL9671.Contig1_All	AP2-EREBP
CL8123.Contig1_All	ARF
CL1577.Contig4_All	ARF
Unigene98_All	ARF
Unigene3564_All	ARF
Unigene23642_All	ARF
CL684.Contig13_All	ARF
CL684.Contig10_All	ARF
CL1577.Contig7_All	ARF
Unigene939_All	ARF
CL10431.Contig5_All	ARF
CL1577.Contig3_All	ARF
CL8123.Contig4_All	ARF
Unigene97_All	ARF
CL3190.Contig2_All	ARF
CL3190.Contig1_All	ARF
Unigene687_All	ARF
Unigene10956_All	ARF
CL684.Contig5_All	ARF
Unigene5789_All	ARF
Unigene14570_All	ARF
CL1833.Contig6_All	bHLH
CL5696.Contig5_All	bHLH
CL3182.Contig1_All	bHLH
CL7338.Contig4_All	bHLH
Unigene33566_All	bHLH
Unigene15665_All	bHLH
CL3457.Contig4_All	bHLH
CL3457.Contig2_All	bHLH
CL1833.Contig7_All	bHLH
Unigene20542_All	bHLH
CL3200.Contig1_All	bHLH
CL3457.Contig3_All	bHLH
CL1035.Contig4_All	bHLH
Unigene14587_All	bHLH
CL6183.Contig1_All	bHLH
CL572.Contig18_All	bHLH
Unigene24922_All	bHLH
CL7338.Contig1_All	bHLH
Unigene29818_All	bHLH
Unigene29817_All	bHLH
Unigene10591_All	bHLH
CL1067.Contig4_All	bZIP
Unigene8686_All	bZIP
CL1067.Contig3_All	bZIP
CL1067.Contig1_All	bZIP
CL1067.Contig2_All	bZIP
Unigene27253_All	bZIP
Unigene8415_All	bZIP
CL6263.Contig2_All	bZIP
CL6263.Contig4_All	bZIP
Unigene27757_All	C2C2-CO-like
Unigene8672_All	C2C2-Dof
Unigene34149_All	C2C2-GATA
CL2802.Contig5_All	C2C2-GATA
CL4047.Contig1_All	C2C2-GATA
CL5843.Contig1_All	C2C2-GATA
CL9145.Contig2_All	C2C2-GATA
Unigene31060_All	C2C2-YABBY
Unigene45588_All	C2C2-YABBY
Unigene5459_All	C2H2
Unigene27656_All	C2H2
CL6760.Contig2_All	C2H2
Unigene22300_All	C2H2
Unigene17626_All	C2H2
CL10013.Contig1_All	C2H2
CL4907.Contig1_All	C2H2
CL1911.Contig2_All	C2H2
Unigene21732_All	C2H2
CL8799.Contig2_All	C2H2
Unigene21734_All	C2H2
Unigene18149_All	C2H2
CL1911.Contig1_All	C2H2
Unigene23801_All	C2H2
Unigene31668_All	C2H2
CL4080.Contig3_All	C2H2
Unigene11710_All	C2H2
Unigene26736_All	C2H2
CL4080.Contig2_All	C2H2
Unigene8673_All	C2H2
CL687.Contig8_All	C2H2
Unigene10458_All	C2H2
CL5700.Contig1_All	C2H2
CL5700.Contig2_All	C2H2
Unigene11755_All	C2H2
Unigene11756_All	C2H2
Unigene16980_All	C2H2
CL2210.Contig1_All	C3H
CL8923.Contig2_All	C3H
CL124.Contig15_All	C3H
CL1855.Contig4_All	C3H
Unigene16987_All	C3H
CL1240.Contig14_All	C3H
CL1240.Contig12_All	C3H
CL1240.Contig17_All	C3H
CL3598.Contig4_All	C3H
CL713.Contig9_All	C3H
CL6885.Contig1_All	C3H
CL1477.Contig1_All	C3H
Unigene29644_All	C3H
Unigene29646_All	C3H
Unigene23294_All	CPP
Unigene11396_All	CSD
CL1289.Contig5_All	DBB/CO-like
CL1289.Contig3_All	DBB/CO-like
CL1289.Contig1_All	DBB/CO-like
CL8662.Contig1_All	DBB/CO-like
CL8662.Contig2_All	DBB/CO-like
CL7003.Contig2_All	FAR1
Unigene3805_All	FAR1
Unigene26699_All	FAR1
CL1720.Contig2_All	FAR1
CL3822.Contig1_All	FAR1
CL7411.Contig3_All	FAR1
Unigene27550_All	FAR1
Unigene14301_All	FHA
Unigene21310_All	G2-like
Unigene26968_All	GRAS
Unigene10828_All	GRAS
CL6267.Contig2_All	GRAS
Unigene33467_All	GRAS
Unigene1304_All	GRAS
CL9066.Contig2_All	GRAS
CL9066.Contig1_All	GRAS
Unigene1259_All	GRAS
CL713.Contig14_All	GRAS
CL713.Contig17_All	GRAS
CL4519.Contig2_All	GRF
CL4519.Contig1_All	GRF
Unigene17482_All	GRF
CL10395.Contig2_All	GRF
Unigene7634_All	GRF
CL791.Contig4_All	GRF
CL10395.Contig3_All	GRF
Unigene20233_All	HB-other
CL9106.Contig2_All	HD-ZIP
CL7698.Contig2_All	HD-ZIP
CL7698.Contig1_All	HD-ZIP
CL10638.Contig2_All	HD-ZIP
CL10638.Contig3_All	HD-ZIP
Unigene30359_All	HD-ZIP
CL2037.Contig1_All	HD-ZIP
CL219.Contig2_All	HD-ZIP
CL219.Contig1_All	HD-ZIP
CL5377.Contig1_All	HD-ZIP
CL5377.Contig4_All	HD-ZIP
CL5377.Contig3_All	HD-ZIP
CL5377.Contig2_All	HD-ZIP
Unigene15112_All	HD-ZIP
Unigene30240_All	HD-ZIP
Unigene17401_All	HD-ZIP
Unigene16559_All	HSF
Unigene33556_All	HSF
CL3313.Contig8_All	HSF
Unigene14180_All	LIM
Unigene21895_All	LOB
CL2870.Contig1_All	LOB
CL117.Contig1_All	LOB
CL117.Contig2_All	LOB
CL612.Contig1_All	MADS
CL7419.Contig2_All	MADS
CL3064.Contig2_All	MADS
CL8262.Contig1_All	MADS
Unigene10328_All	MADS
CL3064.Contig6_All	MADS
Unigene27196_All	mTERF
Unigene8881_All	mTERF
Unigene21058_All	mTERF
CL538.Contig3_All	mTERF
Unigene10652_All	mTERF
CL10163.Contig1_All	MYB
CL9116.Contig3_All	MYB
Unigene8862_All	MYB
Unigene34066_All	MYB
CL2165.Contig1_All	MYB
CL843.Contig2_All	MYB
CL292.Contig4_All	MYB
Unigene13477_All	MYB
CL7034.Contig1_All	MYB
CL454.Contig4_All	MYB
CL326.Contig1_All	MYB
Unigene8680_All	MYB
CL10627.Contig3_All	MYB
CL919.Contig5_All	MYB
CL3290.Contig2_All	MYB
CL2165.Contig2_All	MYB
CL9116.Contig2_All	MYB
Unigene354_All	MYB
Unigene4949_All	MYB
Unigene27400_All	MYB
CL3290.Contig3_All	MYB
CL454.Contig3_All	MYB
CL10627.Contig9_All	MYB
Unigene24706_All	MYB
CL408.Contig2_All	MYB
CL10502.Contig2_All	MYB
CL9514.Contig1_All	MYB
Unigene21059_All	MYB
Unigene24316_All	MYB
CL3290.Contig1_All	MYB
CL5511.Contig3_All	MYB
Unigene719_All	MYB
CL9460.Contig2_All	MYB
Unigene14060_All	MYB
Unigene13922_All	MYB
Unigene1915_All	MYB
CL2057.Contig1_All	MYB
CL414.Contig4_All	MYB
Unigene49009_All	MYB
Unigene17029_All	MYB
Unigene17030_All	MYB
CL10639.Contig2_All	MYB
Unigene13659_All	NAC
CL2523.Contig7_All	NAC
CL2264.Contig2_All	NAC
CL2523.Contig3_All	NAC
Unigene33414_All	NAC
Unigene26525_All	NAC
Unigene14893_All	NAC
Unigene14044_All	NAC
CL1470.Contig5_All	NAC
CL2345.Contig2_All	NAC
Unigene26993_All	NAC
Unigene1335_All	NAC
Unigene25925_All	NAC
CL5619.Contig3_All	NAC
Unigene13662_All	NAC
Unigene666_All	NAC
CL713.Contig13_All	NAC
CL1470.Contig1_All	NAC
CL713.Contig4_All	NAC
Unigene18134_All	NAC
Unigene30522_All	NAC
CL2037.Contig3_All	NAC
Unigene18113_All	NAC
Unigene13661_All	NAC
CL1470.Contig11_All	NAC
Unigene30973_All	NAC
Unigene20496_All	NAC
CL2523.Contig1_All	NAC
CL1470.Contig7_All	NAC
CL2264.Contig3_All	NAC
CL2264.Contig1_All	NAC
CL588.Contig2_All	NF-YA
CL588.Contig3_All	NF-YA
Unigene33748_All	NF-YB
Unigene17446_All	PLATZ
CL960.Contig4_All	RWP-RK
Unigene20483_All	Sigma70-like
Unigene30621_All	Sigma70-like
CL2762.Contig8_All	Sigma70-like
CL3398.Contig3_All	TAZ
CL3398.Contig1_All	TAZ
CL3398.Contig6_All	TAZ
CL3398.Contig5_All	TAZ
Unigene7300_All	TCP
CL5186.Contig4_All	TCP
CL5186.Contig3_All	TCP
CL5186.Contig2_All	TCP
Unigene2072_All	Tify
Unigene43459_All	Tify
Unigene10998_All	Tify
CL4878.Contig3_All	Tify
CL4878.Contig5_All	Tify
CL3167.Contig5_All	Trihelix
CL9514.Contig2_All	Trihelix
CL8156.Contig1_All	Trihelix
CL3167.Contig1_All	Trihelix
CL8156.Contig2_All	Trihelix
CL7561.Contig1_All	WRKY
CL2105.Contig10_All	WRKY
CL2105.Contig4_All	WRKY
CL2105.Contig5_All	WRKY
Unigene1613_All	WRKY
Unigene14688_All	WRKY
CL9347.Contig1_All	WRKY
CL9465.Contig5_All	WRKY
Unigene20386_All	WRKY
CL2105.Contig9_All	WRKY
Unigene24357_All	WRKY
CL9072.Contig2_All	WRKY
CL925.Contig2_All	WRKY
Unigene11431_All	WRKY
CL1529.Contig1_All	WRKY
CL7561.Contig2_All	WRKY
Unigene33945_All	WRKY
CL2105.Contig7_All	WRKY
Unigene21704_All	WRKY
Unigene31018_All	WRKY
Unigene30448_All	WRKY
Unigene6387_All	WRKY
Unigene3355_All	WRKY
Unigene5746_All	WRKY
Unigene14717_All	zf-HD
Unigene29973_All	Zn-clus
CL4777.Contig1_All	Zn-clus
CL4777.Contig3_All	Zn-clus
Unigene8663_All	Zn-clus
Unigene29949_All	Zn-clus
CL7008.Contig2_All	Zn-clus
CL5400.Contig2_All	Zn-clus
Unigene12183_All	Zn-clus
Unigene11083_All	Zn-clus
CL8766.Contig2_All	Zn-clus
CL5445.Contig1_All	Zn-clus
Unigene33448_All	Zn-clus
CL7397.Contig1_All	Zn-clus
CL5445.Contig3_All	Zn-clus
