# Supplementary material for: Leaf Coloration in Acer palmatum Is Associated with a Positive Regulator ApMYB1 with Potential for Breeding Color-Leafed Plants
Source: Plants (Basel). 2022 Mar 12;11(6):759. doi: 10.3390/plants11060759 (PMC8955597; doi:10.3390/plants11060759)
Supplement: Supplementary file 1 [file plants-11-00759-s001.zip › Suppl Table S5-Sequences for alignment and of ApMYB1.xlsx]

## Sheet: Proteins for alignment
>MdMYB10-DQ267896
MEGYNENLSVRKGAWTREEDNLLRQCVEIHGEGKWNQVSYKAGLNRCRKSCRLRWLNYLKPNIKRGDFKEDEVDLIIRL
HRLLGNRWSLIARRLPGRTANAVKNYWNTRLRIDSRMKTVKNKSQEMRETNVIRPQPQKFNRSSYYLSSKEPILDHIQS
AEDLSTPPQTSSSTKNGNDWWETLLEGEDTFERAAYPSIELEEELFTSFWFDDRLSPRSCANFPEGHSRSEFSFSTDLW
NHSKEE
>CsMYBA-AWK49560
MADSLGVRKGAWTGEEDDLLRKCIEKYGEAKWHQVPLRAGLHRCRKSCRLRWLNYLNPNIKRGEFAADEVDLILRLHKLL
GNRWSLIVGRLPGRTANDVKNFWNTHLRKKVDKCCKNNKEMKAKAEKVEKINIIKPQPRTFAKNSQWLKGKGMTSNNLQL
GDYNLGKQSTPSDHHHHHQQQQENETESVWWESFLFGDELDQQGISSSLSRPEEESTTANIFAEKSPVVTKVTENRVIEA
GQSCPTDDFAFDAELWDLLNAK
>PamMybA.1
MEGYNLGVRKGAWTREEDDLLRKCIEKQGEGKWHQVPYKAGLSRCRKSCRLRWLNYLKPNIKRGDFMEDEVDLIIRLHK
LLGNRWSLIARRLPGRTANDVKNYWNTRLRTDYCMKKMKDKSQETIKTIIRPQPRRFTKSSNCLSFKEPILDHTQLEEN
FSTTSQTSTSTRIGSDWWETFLDDKDATETATGSGLGLDEELLASFWVDDDMPQSTRTCVNFSEEGLSRGDFSFSVDLW
NHSKEE
>PamMybA.5
MEGYNLGVRKGAWTREEDDLLRQCIEKQGEGKWHQVPYKAGLSRCRKSCRLRWLNYLKPNIKRGEFMEDEVDLIIRLHK
LLGNRWSLIARRLPGRTANDVKNYWNTRLRTDYCMKKMKDKSQETIKTIIRPQPRRFTKSSNCLSFKEPILDHTQLEEN
FSTTSQTSTSTRIGSDWWETFLDDKDATETATGSGLGLDEELLASFWVDDDMPQSTRTCVNFSEEGLSRGDFSFSVDLW
NHSKEE
>PtMYB117-Potri.017G126000
MVSSSGIRKGAWTREEDILLRDCVEKYGEGRWHQVSSKAGLNRCRKSCRLRWLSYLKPGIKRGQYSEDEEDLIIKLHRL
LGNRQVKMWSLIAGRLPGRTANDLKNYWNTNLSKKVVSGTREAQTKPEPKAITKANIIKPRPHKFKSLCWLRGKGIPFF
NGGFQYGYDLCKPWSTSALSPSDIIEVESMRWESLLDDKEISVSSNTGCLRSGSESDQEPIKSLFAEDSAPEGMRIGDV
FCEQGQHCWSGNSFDAADLWNLVNT
>PtMYB119-Potri.017G125600
MVGSLGVRKGAWTEEEDILLRKCVEKYGEGRWHEVPSRAGLNRCRKSCRMRWLNYLKPNVKRGQFSVDEVDLIIRLHKL
LGNRQVKMWSLIAGRLSGRTANDVKNYWNSNQRKKVISSTDEVQSKPKAKSITRDNIIKPQPWKFRNLFWLRGKSTPLI
NVGSQYGDDLCKPCYSTVSPPSDINEVESIWWESSLDDKEINQTINSSCLGSVSVSAAAAYLESSESHFVKNNAPRGIK
TGDVFYEQGQNCWSDISLDADLWNLINTELDQQQPEGLQSIML
>VvMYBA1-BAD18980
MESLGVRKGAWIQEEDVLLRKCIEKYGEGKWHLVPLRAGLNRCRKSCRLRWLNYLKPDIKRGEFALDEVDLMIRLHNLL
GNRWSLIAGRLPGRTANDVKNYWHSHHFKKEVQFQEEGRDKPQTHSKTKAIKPHPHKFSKALPRFELKTTAVDTFDTQV
STSRKPSSTSPQPNDDIIWWESLLAEHAQMDQETDFSASGEMLIASLRTEETATQKKGPMDGMIEQIQGGEGDFPFDVG
FWDTPNTQVNHLI
>AmROSEA1-DQ275529
MEKNCRGVRKGTWTKEEDTLLRQCIEEYGEGKWHQVPHRAGLNRCRKSCRLRWLNYLRPNIKRGRFSRDEVDLIVRLHK
LLGNKWSLIAGRIPGRTANDVKNFWNTHVGKNLGEDGERCRKNVMNTKTIKLTNIVRPRARTFTGLHVTWPREVGKTDE
FSNVRLTTDEIPDCEKQTQFYNDVASPQDEVEDCIQWWSKLLETTEDGELGNLFEEAQQIGN.
>AtMYB113-At1g66370
MGESPKGLRKGTWTTEEDILLRQCIDKYGEGKWHRVPLRTGLNRCRKSCRLRWLNYLKPSIKRGKLCSDEVDLVLRLHK
LLGNRWSLIAGRLPGRTANDVKNYWNTHLSKKHDERCCKTKMINKNITSHPTSSAQKIDVLKPRPRSFSDKNSCNDVNI
LPKVDVVPLHLGLNNNYVCESSITCNKDEQKDKLININLLDGDNMWWESLLEADVLGPEATETAKGVTLPLDFEQIWAR
FDEETLELN
>AtMYB114-At1g66380
MEGSSKGLRKGAWTAEEDSLLRQCIGKYGEGKWHQVPLRAGLNRCRKSCRLRWLNYLKPSIKRGKFSSDEVDLLLRLHK
LLGNRWSLIAGRLPGRTANDVKNYWNTHLSKKHEPCCKTKIKRINIITPPNTPAQKVDIF
>AtPAP1-At1g56650
MEGSSKGLRKGAWTTEEDSLLRQCINKYGEGKWHQVPVRAGLNRCRKSCRLRWLNYLKPSIKRGKLSSDEVDLLLRLHR
LLGNRWSLIAGRLPGRTANDVKNYWNTHLSKKHEPCCKIKMKKRDITPIPTTPALKNNVYKPRPRSFTVNNDCNHLNAP
PKVDVNPPCLGLNINNVCDNSIIYNKDKKKDQLVNNLIDGDNMWLEKFLEESQEVDILVPEATTTEKGDTLAFDVDQLW
SLFDGETVKFD
>AtPAP2-At1g66390
MEGSSKGLRKGAWTAEEDSLLRLCIDKYGEGKWHQVPLRAGLNRCRKSCRLRWLNYLKPSIKRGRLSNDEVDLLLRLHK
LLGNRWSLIAGRLPGRTANDVKNYWNTHLSKKHESSCCKSKMKKKNIISPPTTPVQKIGVFKPRPRSFSVNNGCSHLNG
LPEVDLIPSCLGLKKNNVCENSITCNKDDEKDDFVNNLMNGDNMWLENLLGENQEADAIVPEATTAEHGATLAFDVEQL
WSLFDGETVELD
>Unigene49009_All
MSHYPKPLYFFGFSPRNPSGYQCPPVSNEFIHSMNEIFFLFRHVYELPFNTAHLFRATITSLGLFPATQTYKMRKISLT
C
>CL292.Contig4_All
MGKKTTGKKGREKEKNKNEDPSTLREARHSENELRSSAENGAKLHDEDKANNESSHEISGNSVDFEASQSEEPLEVDVD
LEKKKKKKKKKNRHETSGGDVELSACENEPVIKDNVDGDIIKQKKNEKRCENGGNNIDLSIRQSEAVRESNVAEDKRKK
KKKKLSEASGSAVKHNADQNDVLEGEVQVNKKKKRKGRHEVSVVKGQTEPKQGDIPGLMNGEEVDQKKKKKKRKKENGA
DFAEVEDVTDAEAGKDREQLDEKMMENVDNSRKKKKRKRNHSDDVMATNRTQKKSSKKVSFSDDVEVFPPPAGLVRGKR
FSEEENEMLKKAVLSYIEACGLGEEGLDMVLNCRSHPETKNCWKEIAAALPWRPRESIYYRAHIIFERDENHKWSPEEL
ELVKKFHEKHGSDWKRLASGLGKHRLHVKDAWRRIRFPNRKMGQWSQEEYQNLFDLVNSDLRMRASEEKKSKHGMLRDN
ISWEAISEKLTTRTNALCCQRWYDQLTSPLVKEGKWSDIDDYHLVIALSGFDACHIDDVDWDNLLEHRPGDICRKRWYQ
MVKHLGPYGSKPFAEQVEILSQRYCEDVLEAREAYNSRPAIDEVISQRHD
>CL326.Contig1_All
KYFNSRLSLSISISTPNFLSLSLYIYIYTYILVEVKRKIKERKMGRQPCCDKVGLKKGPWTAEEDKKLISFILTNGQCC
WRAVPKLAGLLRCGKSCRLRWTNYLRPDLKRGLLSPFEEQLVIDLHAKLGNRWSKIASHLPGRTDNEIKNHWNTHIKKK
LRKLGIDPLTHNPLSTPTPQPPQNDQNQVPQQITKPPSIMPEENDHDHQNIEEEVIALESSNTISLKNMTTPELETTDF
CTEDVPLIDPYEILVPNNSSTAATTILPSTSTTSTATATTTSSSSASCSSSSSSDRPSKNKFLDQDHHEWQFPDFEWPS
TSFDYYNDHDNNNNNYNMGLWDYDLSSSWDLMIINADHDGDSTKKLDIVNPDPLFNYQCPRMVFDQDSW
>CL408.Contig2_All
MGSCGRSGAVRQYIRSKVPRLRWTPELHHCFVHAIERLGGHDKATPKLVLQLMDVKGLTISHVKSHLQMYRSMRSDLGR
QEKGSTQQRRQSFEQHDGCVEEVNHEMGFRQPSSEPIKESDSQCIYTTPLPSKRARIESSTRSSISDQNLQCSQGICDT
TVSNPYRFDDYVKKHNKASDQKGIKEDYYGGGGLIRYEQTYSRPPSTTPLFKYSLPQSDILKEVGNGNVREEEDLSLVL
SLHHPSSQRSNASSTTSEMSEAVSSYSRSNFKDSFGYNNNNNINLDLSIALCGI
>CL414.Contig4_All
MTMVEGFVGVRKGAWTHEEDNLLRKCIEKYGEQKWHQIPLRAGLNRCRKSCRLRWLNYLKPNIKRGEFTEDEVDMILRL
HKLLGNRWSLIAGRLPGRTANDVKNYWNTHLRRKTVSSKRLDWKGMKISTNQNTEKINVIKPQPRTFSKKASVQMNAKI
TMELENKRELLGHPNLYKKAPPLPPPPPSSSLSMDTPANEVMWWERLLQSGEFVQETPATTSMIGWSDGTTVANFWEEK
SSMFAGSTWFEADKICLGKHHHDMDFDADLSNLLNTEEEYAI
>CL454.Contig3_All
MEARPLSIQRSGASQLNNLGVSGAMSSSLVPVFPTPLEETYPKLPDSQQISMEREVRARPAARATVVPSNSGVVGHIFS
SSSGFSSDLQYSSVILSPHGKHPRNIPFISQSSTNSAALPIPQSSHSNMPQSTTSSHYAKESSSSWCPESLPGFIDFPT
NTSLHNSQLESSSCSGVMSSEDFSKRNDWQDWADQLITDDDALATNWNELLDDNNMTDLEPKVWAALKCGD
>CL454.Contig4_All
MAYQVSKTSAIIPVHQTQVQQQLPAPSGEICNVVTPSSSANSGPAKPRMRWTPELHEAFVEAVNQLGGSERATPKGVLK
LMKVEGLTIYHVKSHLQKYRTARYRPDSLEGSSEKRLIPLEEISSLDLKTGIEITEALRLQMEVQKRLHEQLEIQRNLQ
LRIEEQGRYLQMMFEKQKSGMDKLKASSPNAATPSSDAIQDSLAKSEQEGPQLDHGKKGTDTVGANSTLEGSSQELGNN
NQKALETEAPESCEPNVSESSLQPTKRSRTDK
>CL843.Contig2_All
MGRAPCCDKNGLKKGPWTPEEDLKLTDYIQKHGYGNWRTLPKNAGLQRCGKSCRLRWTNYLRPDIKRGRFSFDEEETII
QLHSILGNKWSAIAGRLPGRTDNEIKNYWNTHIRKRLLRMGIDPVTHSPRLDLLDLSSILSSSFYNSSQINISRLLGVH
PTLVNPELIRLATSLMSSQRDQNQNQNYHAHQNVQHHQINQICNQQEAEQFQYQQQQQIMNHHHHPQVVEQFQTDFTNF
TNQNDQWQSNEMPSSNLTQEDYVPIPTSHYSYYGGSGNNSDQTVVMDPSISSVTNSNNNFSFASVLSTPSSSPTPLNSN
STTYNISTEDHEIESYCSEMLKFEIQDILDGEFM
>CL919.Contig5_All
MSYNNEYDGDGFSGSENDDAFDEDMEALRRACMITGTDPNELDNVDRSSSPALDDSSAGAAVAVDSGAFSSDSEDDLEL
VRNIQNRLALSNSSDLCEPLSLEALCTLPPDGSDDDDDDFEILRVIQRRFSAYDMTDTTKNITEDLLETPKQVHASIVE
SANDTSNNLFVNRIDVCQGLPDSEEARNNIHLLGNSVERQPSGSDGCHQSDACRFPILPHRRSNFPTSAQLFIDAIKKN
RSYQKFIRSFLQKNNWASIIPEEGSSCPINFSS
>CL2057.Contig1_All
MSTRDNSLKGESKEEKKKVNRRAPCCDKNLVKRGPWSPEEDLKLFSFVQKNGHENWRNLPKQAGLSRCGKSCRLRWINY
LRPDVKRGNFTIEEENTIIQLHATLGNKWAKIAAALPGRTDNEIKNVWNTSLKKRLLNFKRGAKNYYQSKESISMMSST
SSSSTTTSNISSLGKRSRAESELDVDIPQGDDSDMPKKPRESCQDMAGESNESIKDISRNSSFSSNNSSTVTDDANQVL
DHAHDQGDTIRSSEEDHDRQSMDSFFDFSGFGIGLDTLEEVSKPDFIPVIDPLEFNVESWNMWEGLEDILIQSNPAQSF
EDGFDNNNNNDNNKEEVDIMRWYQLLENELGLGATEDENQHEKKSSKESEPLIPAENHYEIPLQEP
>CL2165.Contig1_All
MDVIKGRISCTNSCTSEELADNIMEDLRRGPWTVEEDFKLINYIANNGEGRWNSLARCAGLKRTGKSCRLRWLNYLRPD
VRRGNITLEEQVTILELHSRWGNRWSKIAQHLPGRTDNEIKNYWRTRVQKHAKQLKCDVNSKQFKDTMRYIWMPRLVER
IQAANAATTTTTVPGGFTTTSTTTAATNNNNMVNIPSMANIGYNELNATAAAAAAQVTNSNYTPENSSTAASSDSFGTH
VSPVSDLTDYYNIIPVDDNNNNQPNPDYFQPSGQLGNYSETSLISPTAYFNPGMDFQSLEPNTQLLDGGEALDNLWNVE
DIWFLQQQFNNNM
>CL2165.Contig2_All
PKKKTMDVIKGRISCTNSCTSEELADNIMEDLRRGPWTVEEDFKLINYIANNGEGRWNSLARCAGLKRTGKSCRLRWLN
YLRPDVRRGNITLEEQVTILELHSRWGNRWSKIAQHLPGRTDNEIKNVWNTSLKKRLLNFKRGAKNYYQSK
>CL3290.Contig1_All
MVMGFAQKMQRCHEYVEALEEEKRKIQVFQRELPLCLELVTQAIEDCKKELLGTTTTTTEYMQGGQSECSEQTSSDAPV
LEEFIPLKRTCSSDQDNDEQHSHKPTTTTTTTTSDKKKSDWLRSVQLWNQTPDPPPKEDVPRKATVVEVKRNGNGGAFH
PFLREKSVGKSTDQSVGKPNSAVVPTAATSSTTETVSKGSKREDKEGQSSSAQRKQRRCWSPELHRRFLQALQQLGGSH
GTSTPKQIRELMKVDGLTNDEVKSHLQKYRLHTRRPSPTIHNNANPQAPQFVVVGGIWVPPPEYAAVTAKSSGEAAGVN
GIFAPMAAPPQRAQSQSEHLQSEEGRGSHSEGGHHSSSPATSSSTHTTTTSPAL
>CL3290.Contig3_All
MQGGQSECSEQTSSDAPVLEEFIPLKRTCSSDQDNDEQHSHKPTTTTTTTTSDKKKSDWLRSVQLWNQTPDPPPKEDVP
RKATVVEVKRNGNGGAFHPFLREKSVGKSTDQSVGKPNSAVVPTAATSSTTETVSKGSKREDKEGQSSSAQRKQRRCWS
PELHRRFLQALQQLGGSHGTSTPKQIRELMKVDGLTNDEVKSHLQKYRLHTRRPSPTIHNNANPQAPQFVVVGGIWVPP
PEYAAVTTKSSGEAVGVNGIFSPMAAPPQRAQSQSEHLQSEEGRGSHSEGGHHSSSPATSSSTHTTTTSPAL
>CL5511.contig3_All
MEGSSYGYENGVVMTRDPKPRLRWTVDLHDRFVDAVTKLGGPHKATPKSVLRLMGLKGLTLYHLKSHLQKYRLGQQSRT
QNTHGSTYVHFSNHSPDGTSMISSRADNEQGEIPIAEVQLQKTLQEQLEVQKRLQMRIEAQGKYLQAILEKAQKSLSMD
INKCNGNVDEATRVQLTSFNLALSNLMEDMNEVDRKSNMLEVSKANGSAFRNGGIGDGEQDNKDVKLKIGGGGASMLFD
LNTNGSYEFIAANGIELEPTMLSYK
>CL7034.Contig1_All
GRPPCCDKIGVKKGPWTPEEDQKLLAYIEEHGHGSWRALPAKAGLQRCGKSCRLRWTNYLRPDIKRGKFSLQEEQTIIQ
LHALLGNRWSAIATHLPKRTDNEIKNYWNTHLKKRLAKMGIDPVTHKPKNDALLSPTCDGQSKNAANLSHMAQWESARL
EAEARLVRESKLRSHNSFHHLISTSASASLQLLNKTTTTAGWSTSTTHDLDQSPTSTLTFSENNNNNNGPPVISATIGF
IGSSDTGMIKEEGDHHQDWKGLGSSSTTTNLADQYKDGIENSLSFTSTLHDMTISMEVAPWTPESLRTNNNGHVSVGNS
SMDEGFTNLLLNDSVDRSMSDSCRDSDTSGGGGGSGCGGSGSGGSDDSGGSDYYQDNKNYWNSILNLVNSSPPNSPMF
>CL9116.Contig2_All
MYQDDDGNNNNNNSFVTTRTEWTRLEDKLFEEALVMFSDDSPNRWQNIASQLPGKSPIDVRDHYEALVHDVSEIDSGRV
QLPTYADDLSDWDSSNQISFGNKQNNCNKQNEPERKKGAAWTEEEHKLFLIGLKKFGKGDWRSISRNVVVTRTPTQVAS
HAQKYFLRQNSQKKERKRSSIHDITTVDSNSPALPVDQNWIPPPGGPVQLQPLPTTDQQQPSALQQFLPPSQFPGQHHG
GSEEYPNYGYPM
>CL9116.Contig3_All
MYQDDDGNNNNNNSFVTTRTEWTRLEDKLFEEALVMFSDDSPNRWQNIASQLPGKSPIDVRDHYEALVHDVSEIDSGRV
QLPTYADDLSDWDSSNQISFGNKQNNCNKQNEPERKKGAAWTEEEHKLFLIGLKKFGKGDWRSISRNVVVTRTPTQVAS
HAQKYFLRQNSQKKERKRSSIHDITTVDSNSPALPVDQNWIPPPGGPVQLQPLPTTDQQQPSALQQFLPPSQFPGQHHG
GSEEYPNYGYPM
>CL9460.contig2_All
MNESKDKRMSRSRRNPLSDEEASIEGNFGGVGLLKKGPWTSTEDAILVEHVNKYGEGNWNAVQKHSGLSRCGKSCRLRW
TNHLRPNLKKGTFNQEEERRIIELHAKMGNKWARMAAELPGRTDNEIKNYWNTRVKRLQRTGLPIYPPDVCLQVLNGSP
ESLNMGTLDNPDFPQRDNFEIPAVEFENLELNQRFLSYTPMLLEIPVNSMVKIGTDSSHSNSIMLPTMHLPKCLRESET
FPYLNGNALTTFNQYMDYACEKIAEPFELSSSHDQFQMDVLLGSHALLNDNSSSSETSSGALKLELPSLQYSDTHRDSW
GTPASPLPSIDCIDTLIQSPSTWQDQSESCSPRSSGLLEAVLYESQSLRNSKKDSSQWTSDPSVVPCDSMDSFSLNPCE
KEWEMCGDPNSPLGHSAASVFSEYTPMSGRSLDEPKSVEAMMDCDIEPGTVSQISSKQVERKETPNQMDVFKPDALYSS
GWFRHITGRVKDKSICKDPIAMLLGEDFCSDY
>CL9514.contig1_All
EDHSLESAQPKSSKTVKRNKWKPEEVKKLIKMRGELHSRFQVVKGRMALWKEISTHFMSEGINRSPGQCKSLWASLLQK
YEESKSDEKSRKSWPYYEDLDNILSDSEMAATE
>"CL10163.Contig1_All-rev com
MVRAPCCEKMGLKRGPWTPEEDRILISYIHKHGHANWRALPKQAGLLRCGKSCRLRWINYLRPDIKRGNFTKEEEEAII
NLHKMLGNRWSAIAAKLPGRTDNEIKNVWHTHLKKRLIKQNQANSDTKKHSKSTIITKSESSQSESELTNPASNSLPMS
PQQSSSDVSSVIAVTTGETNDHMEEENKGEHEVVDIDSFEISFPAIDESFWSDALPSDDNSSLSTLDLGQGMINIDDQF
QIDQSPFSSVGFMGYDYNAKSEHDGMDFWYNILLTTESESMVPLF
>"CL10502.Contig2_All-rev com
MFRHLSFKSTSVLSENASGLDLRINFQFPLPSSCTPFLKASSSSRLHLFFILLLASFAASYLFSGDTTFLFGLGK
>CL10627.contig3_All
MINSSSSKKQVSDQPSETSGSASQSQQRPKMSKTEDSEKKNVNKKLKEVEISVPIVYGNVAFWLGKKASEYQSHKWTVY
VRGATNEDLGSVIKRVVFQLHSSFNNPTRVLDSPPFEISESGWGEFEIAITLFFHNDLCDKPLNLFHHLKLYPEDESGP
MSTKKPVVVESYDEIVFPFPEPSESFLARVQNYPAVTLPRLPAGFTLPAPVPTEDTSRKKRGDTKDHPLNQLFMNFSEA
DELLQLAAARQQVQAHIAKLKRQISLIDGQQQQLRTTSDQ
>CL10627.Contig9_All
MINSSSSKKQVSDQPSETSGSASQSQQRPKMSKTEDSEKKNVNKKLKEVEISVPIVYGNVAFWLGKKASEYQSHKWTVY
VRGATNEDLGSVIKRVVFQLHSSFNNPTRVLDSPPFEISESGWGEFEIAITLFFHNDLCDKPLNLFHHLKLYPEDESGP
MSTKKPVVVESYDEIVFPFPEPSESFLARVQNYPAVTLPRLPAGFTLPAPVPTEDTSRKKRGDTKDHPLNQLFMNFSEA
DELLQLAAARQQVQAHIAKLKRQISLIDGQQQQLRTTSDQ
>CL10639.Contig2_All
MTSSKEDESSDKTTSSWGTWEELLLACAVKRHGLKNWDSVAMELQTKTSLPHLLTTAQFCKQKYMDLKRRFKDNHNNIP
WLEHLRKVRVDELKQDLQRYDLSIKLILFLFVFSTYKNILLLLLLL
>Unigene354_All
IPSNPDSSSDSFSSIHHHTKPIDQHTHLPNIDPSTHQSAKHTDRSTHSSTESNLQPLQINQTKPYQHHLPEPPPKNCPK
PAINLHRFINTNPDYHLHQFIFIKTQKIKKKKETHNQTAQNRATTTTKRGDDDTNWRWNSPATTSEATTTISHAFSLFL
SLSY
>Unigene719_All
MLAVSAAAPLTNNNKDERQGEMVESFTMDVDAQEFPDFSDANHLLDSIDFDDLFMGIDDGDMLPDLEMDPEILGDFSLS
GEEESEIINTSAPSVDRVDEEDNNNNLKKEAEEADKISGSGSGSGSGSGLGSSSSSKGEEIVSKREDQPGLKTLTGKDH
SDKPRKSSAQTKSNNNQSKKKMKVDWTPELHRRFVQAVEQLGVDKAVPSRILELMGIDCLTRHNIASHLQKYRSHRKHL
LAREAEAASWSQRRQMYGGGAAAAGGRGGKRDMNTWIAPTIGFPPITPVHHHHHHHPPSFRPLHVWGHPSMDQSLMHMW
PKHVPHSLSPPLTPPSWAQPRPTPPPPDPSYWHPHQRVPNGLTPGTPYFPQPLPAATRYPAPAPVPGILPHHAMYKVDP
GIGVPTPQPCPNPLIDFHPSKESIDAAIGDVLSKPWLPLPLGLKPPSTDSVMVELQRQGVPKIPPTCA
>Unigene1915_All
MASDSLTTQRSSSVAASWTAKQNKQFERALAVYDKDTPDRWHNIAKAVGGKSVEEVKRHYEILLKDVNDIESGRYPFPN
YRSCGSSSNSN
>Unigene4949_all
MRNPSTTPCCSKVGLKRGPWTPEEDELLSTYIKKEGEGRWRTLPKRAGLLRCGKSCRLRWMNYLRPSVKRGQIAPDEED
LILRLHRLLGNRWSLIAGRIPGRTDNEIKNYWNTHLSKKLISQGIDPRTHKPLTNITSQAHHSSSLAVGQADINIKAAS
PPSKANNIRNPNPNLLISSGLEEDNGGTRMMMITTTSPNKENINGYFHNNTSLDDDHDHGYTSLLNRAGGLMISNEDDP
DLDDHVDINCCTTDDLFSSFLNSLINEDALASQSQPLMPSAGNIVDHHHHHHHQP
>Unigene8680_All
MGRAPCCAKVGLHRGPWTPREDTLLTKYIQAHGEGHWRSLPKKAGLLRCGKSCRLRWMNYLRPDIKRGNITPDEDDLII
RLHALLGNRWSLIAGRLPGRTDNEIKNYWNTHLSKRLRSQGTDPNTHRKLSEPDQDRTRSRKKTTTKNNKKKHNSNNNN
KKALMVQPEKPKVHLPKPVRVTSLLSLPRNESFEFNTASTTNLEGGGLGSSGTEDVQQLPSYVFNGVDHDDDQNGTAGF
LAGVHDHDDLVNGSDFECQSHVFTGENSLEKLYEEYLQILKNEDDRDQVQLDSFAESLLI
>Unigene8862_All
MGKPSSPERNNNSNGGVVKKGPWTVEEDQKLIDYIQKHGHGRWRLLPKNAGLKRCGKSCRLRWTNYLRPDIKRGEFSLE
EEEIIIQLHRVLGNK.
>Unigene13477_All
MINSSSSKKQVSDQPSETSGSASQSQQRPKMSKTEDSEKKNVNKKLKEVEISVPIVYGNVAFWLGKKASEYQSHKWTVY
VRGATNEDLGSVIKRVVFQLHSSFNNPTRVLDSPPFEISESGWGEFEIAITLFFHNDLCDKPLNLFHHLKLYPEDESGP
MSTKKPVVVESYDEIVFPFPEPSESFLARVQNYPAVTLPRLPAGFTLPAPVPTEDTSRKKRGDTKDHPLNQLFMNFSEA
DELLQLAAARQQVQAHIAKLKRQISLIDGQQQQLRTTSDQ
>Unigene13922_All
FLKKGGLLLLLLLLVLKMGRHSCCYKQKLRKGLWSPEEDEKLLRHITKYGHGCWSSVPKQAGLQRCGKSCRLRWINYLR
PDLKRGTFSQQEENLIIELHAVLGNRWSQIAAQLPGRTDNEIKNLWNSCLKKKLRQRGIDPVTHKPLSEAENGEDKNQP
TNSQDKSSGVSSELNLLSTDTSNNPPGANLHDQKPTSIAPQTYQLDNLMNSTATTNKDFFLDRFVTSTHETTTTAAVNS
QGSDLVGNFPLQQLNCASTNSRLSTPSNHNPWFPQTSLPPVSSPFISSPMNFKNSVNFPPENHPIPSFTINGSRYWETG
GGGGAPTSNSNSGSVSSNGTELQSNNSPFFENSLFSWGGLADCSSTEKESQIPLMDNQPEDIKWPEYFHNPSLLMAAAL
QNQTPQSIYNDIKSETTHFLTDSSSSGIIWPHHNLNHHHQQQQQQQQQQSLQNSDICVKEIQRLTATYGHI
>Unigene14060_All
MNTQKINFQERIQQKNGLVGDCSIEFGNHSSDYFGIQQQQPPWNMRIRMQPTSLEAGGGSQHQILGPVRSSSSTILSRF
ESPASAFYATERYMGFPDQYDCQVGNPSPCSQFSRDCDSEFPTYQFSRENFPVISTEPSIELRNSTLQSIPKSDFCSNN
NQYYTSSENSYRNPPSNRPFLPEQVKLLSGPFEENQDHRVGNSSYGSMNYASQQEKQSPRFSLGGVSSGSSVSSGAVLS
SKTRIRWTQDLHEKFVECVNRLGGAEKATPKAILKLMESDGLTIFHVKSHLQKYRMAKYIPDSAEGKSETRNTSLNDLP
QLDVKTGLQIKEALQLQLDVQMRLHEQLEIQRNLQLRIEEQGRQLKMLFDQQKKNKQQQPGE
>Unigene17029_All
MDKRRRKQAKTSNCCSEEVSSIEWEFINMSEQEEDLIHRMYKLVGDRWALIAGRIPGRKAEEIERFWIMRHGEVFANRR
KELKR
>Unigene17030_All
MDKRRRKQAKTSNCCSEEVSSIEWEFINMSEQEEDLIHRMYKLVGDRWALIAGRIPGRKAEEIERFWIMRHGEVFANRR
KELKR
>Unigene21059_All
MGRAPCCDKANVKKGPWSPEEDAKLKEYIDKQGTGGNWISLPQKAGLKRCGKSCRLRWLNYLRPNIKHGEFSDDEDRII
CGLFANIGSRWSIIAAQLPGRTDNDIKNYWNTKLKKKLMGIINNNSSHQRKPHQATSFSSLLLHQTSTSSPSPSTISYN
CSNSTNYYYTPARSVLTTNNDLLELNSSFSSLLSSVGGGGVPILQPQESFLGSMQNNYQVNKDSSSTVLMFGGDQASCS
SSDGSCNNNNNQIISHGKELDQYHDYGQMGNLQNCFYSNNNRVDEENQKFMISTGCSDHLQQEYKPNIISWGDDRTPLD
YGGLEEIKQLISSTTSTTSNNCNNFLFDENKTEEKVMYY
>Unigene24316_All
MGRKCSHCGNIGHNSRTCTAYRSASDVAVGGLRIFGVHLDVSSSSSSSSSSSIPSMMKKSFSMDCFPSSTSSSPSSSLS
TTLVSIDEDHNKTSINGYLSDGLMTTRTQEKKKGVAWTEEEHRTFLMGLEKLGKGDWRGISKNFVRTRTPTQVASHAQK
YFLRQVSLNKKKRRSSLFDMVRSSSTTSTMAGHHRVNSSCGSKPSNGSQHEKIIPLVLDLTSFSHEQANQTAASSQQHQ
VVPIWVHGMNDFNKKQTSSKPHNAAAAAADDHDDLELTLATPDNKSPPPNKPHLIRPISVT
>Unigene24706_All
MGRAPCCDKTKVKRGPWSPEEDSTLIRFLETHGSAGNWIALPQKAGLKRCGKSCRLRWLNYLRPNIKHGNFTKDEDEII
CTLYTQMGSRWSLIASNLPGRTDNDVKNYWNTKLKKKLLAGKVISLTTTNNYINSNKFPEKSCNRTTPHDLLDSSISTP
PSSSTYDHHHHNHLHFSSFSSQPQIISSSSPPPFPILTDHMGYGSSSTVVNSTHEISLMSSDPTHDHHFSHHGHVSEFS
TNLNNSSSSIFTSSQEGGSSSVSVSADSSSLAMENNNKSLSADGSAVHEDLQGGILMDFSFGVGGPTDNEFFNSSSGIW
FQDQKASHEEAGLSYCCYPNLGDQSSSYADIKQAQGLINQSVINQY
>Unigene27400_All
MRNSQRIGVRQYNKSQLPRLRWTPELHEQFTDAVHILGGKYKASPKRILQMMNAKGLNISHIKSHLQMYRNTKEPNDHS
KFVIPIMKHLNIQRTDVQDGGFLSLSSPRRQAGGHRFTDYWEYNERSNIEYEIFSEESNGILQTKILDCDEAENQQDSH
TSSSVGRQNEICELSLSFNIPSMVMMQSDDQEERESWPPSNDQSTSLMDNPFNIAHHDLPSLRSTNHLNLDLTI
>Unigene34066_All
MVLQRRLNYGFSGYEVPAVPRASRSPRGRVPIRKKRDDNRIRAIEILACVAGKLLQDAENSSPNAACREEWDNIFENTI
KCKKGHHQRYNEDEAKVLKRDPCEQEICKENFTCEFSRVPGLQGHRQSYKVNEFSCARGNFGFKTNSTSYFADHSRVGR
YSSNSVEFFRGHVDSVIETNSEAKLSTVLIRPSDKISFAPQTVDFFRGQIDSVTERKYDAKPSIIRSNKSENFPVKGSL
DTLELNLKPPSPVRPESDLKASLFRHRKTCGSYSRRCANAEVDIRDVDENSVCFPQPGRPTPNIVEQSIRNFSTSRQWR
RALNLKGGAFRRTDWKRKSTYCNGRPCHTRQRSQRISPYKRRKFF
>CL3290.Contig2_All
MKVDGLTNDEVKSHLQKYRLHTRRPSPTIHNNANPQAPQFVVVGGIWVPPPEYAAVTAKSSGEAAGVNGIFAPMAAPPQ
RAQSQSEHLQSEEGRGSHSEGGHHSSSPATSSSTHTTTTSPAL

## Sheet: ORF of ApMYB1
ORF of ApMYB1
ATGACCATGGTAGAGGGATTTGTAGGAGTTCGAAAAGGTGCATGGACTCATGAAGAAGATAATCTTCTCAGGAAATGCAT
TGAAAAATATGGAGAACAAAAATGGCATCAAATTCCACTTAGAGCTGGGCTAAATCGGTGCCGGAAAAGTTGTAGATTGA
GATGGCTGAATTATCTGAAGCCAAATATCAAGAGAGGAGAGTTCACTGAAGATGAAGTCGATATGATTTTGAGGCTGCAT
AAATTGTTGGGAAACAGATGGTCATTGATTGCTGGAAGACTTCCTGGAAGAACAGCAAATGATGTCAAGAACTACTGGAA
CACACATCTACGCAGAAAAACTGTTTCTTCAAAGAGATTAGATTGGAAAGGCATGAAAATTAGTACTAACCAGAACACAG
AAAAGATTAATGTTATAAAACCTCAACCTCGGACCTTCTCGAAAAAAGCATCGGTACGGATGAATGCGAAAATCACCATG
GAATTAGAAAACAAAAGAGAGTTATTAGGGCATCCGAATATTTACAAGAAAGCACCAGCGCCGCCACCGCCGCCATCGTC
ATCATTATCAATGGATACACCAGCTAATGAAATCATGTGGTGGGAGAGGCTGTTACAGAGTGGTGAATTTGTGCAAGAAA
CTCCAGCAACGACCTCTATGATAGGGTGGTCAGATGGGACTACCGTGTCCAACTTTTGGGCAGAAAAATCTCCAATGTTT
GCTGGCAGTACTTGTTTTGAAGAGGACAAGATCTGTTTGGGTAAACATCACCATGACATGGATTTTGATGCAGACCTATG
GACTCTTCTTAACACAGAAGAAGAATATGCAATTTAA
