# Supplementary material for: Leaf Coloration in Acer palmatum Is Associated with a Positive Regulator ApMYB1 with Potential for Breeding Color-Leafed Plants
Source: Plants (Basel). 2022 Mar 12;11(6):759. doi: 10.3390/plants11060759 (PMC8955597; doi:10.3390/plants11060759)
Supplement: Supplementary file 1 [file plants-11-00759-s001.zip › Suppl Table S6-Primers used in this work.xlsx]

## Sheet: Sheet1
Primer name	sequence (5' to 3')	application
ApCHS1-qF	TTTGGATGAGATGAGGAGGAAG	Checking expression pattern of RNA-Seq data
ApCHS1-qR	TTACTGAGCTGCCTGAATAGGG	Checking expression pattern of RNA-Seq data
ApCHS2-qF	AAGAAATCAGCCGAAGATGG	Checking expression pattern of RNA-Seq data
ApCHS2-qR	TCTCGACAGTAAGGCCAGGA	Checking expression pattern of RNA-Seq data
ApCHI-qF	AGTGGAGAATGCAAATGTGGT	Checking expression pattern of RNA-Seq data
ApCHI-qR	GAGAGTGTTGGCTATGGAGGTT	Checking expression pattern of RNA-Seq data
ApF3H-1-qF	AGCTTGCGAGGTTGAAGAAG	Checking expression pattern of RNA-Seq data
ApF3H-1-qR	AAGATTTGCTCAATAGGCTTGG	Checking expression pattern of RNA-Seq data
ApF3H-3-qF	GACCTCGCACTTGGTCTCTC	Checking expression pattern of RNA-Seq data
ApF3H-3-qR	ATGAAAGCATTGGGGATAGGTT	Checking expression pattern of RNA-Seq data
ApF3H-4-qF	CAGTGTTTTGCACTCCTCCA	Checking expression pattern of RNA-Seq data
ApF3H-4-qR	TTTGCGGTGTCGATATTCAG	Checking expression pattern of RNA-Seq data
ApDFR1-qF	ACGACATCCCAACAGAGTACAAA	Checking expression pattern of RNA-Seq data
ApDFR1-qR	GTTTCCACAGCTCCAGTAAACA	Checking expression pattern of RNA-Seq data
ApDFR2-qF	CCAAAAGCTCAAGGACTTAGGA	Checking expression pattern of RNA-Seq data
ApDFR2-qR	TGGAATGTGACCCTTCTCTTG	Checking expression pattern of RNA-Seq data
ApANS-qF	TGTCAACAAGGAGAAAGTCAGG	Checking expression pattern of RNA-Seq data
ApANS-qR	TGCTGAATATGCTGATGAAAGG	Checking expression pattern of RNA-Seq data
ApLAR-qF	TCAGTTCATTTTCGACCATCC	Checking expression pattern of RNA-Seq data
ApLAR-qR	GGGTAGAGTACGTCCAATTTTGTT	Checking expression pattern of RNA-Seq data
ApF3'H-qF	AGAATTTGTGCCGGACTGAC	Checking expression pattern of RNA-Seq data
AqF3'H-qR	TGAGCCCATAAGCCTCCTC	Checking expression pattern of RNA-Seq data
ApGT2-qF	GTTGGAGACAGAGCAGAGGAG	Checking expression pattern of RNA-Seq data
ApGT2-qR	TGCGACTCAACCTCAATTCTT	Checking expression pattern of RNA-Seq data
ApGT3-qF	GAATCTACAGGAAGGAGCTTGTG	Checking expression pattern of RNA-Seq data
ApGT3-qR	AACTCCATGAGCAGACAACAGAC	Checking expression pattern of RNA-Seq data
ApGT4-qF	GTGAAGGAGTTCCATTGCTGT	Checking expression pattern of RNA-Seq data
ApGT4-qR	TTTCTCTATCTTCCCACTCTCCA	Checking expression pattern of RNA-Seq data
ApGT5-qF	GAGGCATTGTTGTGATGTTTTG	Checking expression pattern of RNA-Seq data
ApGT5-qR	TAGCTCCTCTTCTTTGCATTCTCT	Checking expression pattern of RNA-Seq data
ApGT6-qF	GGCTCTTCTTTCACTGCATTTT	Checking expression pattern of RNA-Seq data
ApGT6-qR	ATTTTCTGCTGACGTGACCTTT	Checking expression pattern of RNA-Seq data
ApGT7-qF	ATTGGAGCACTACTGGCCTATC	Checking expression pattern of RNA-Seq data
ApGT7-qR	GTGCAGTCTCTGGATGGTTGT	Checking expression pattern of RNA-Seq data
ApMT1-qF	TGAAGGTGAACGGTGGTGT	Checking expression pattern of RNA-Seq data
ApMT1-qR	CGAAGGGTTCCAGTGTCAG	Checking expression pattern of RNA-Seq data
ApMT2-qF	ATCTGCCTTAGAGCCATTTCTG	Checking expression pattern of RNA-Seq data
ApMT2-qR	TGTGACCATTCCTAGACCCTTT	Checking expression pattern of RNA-Seq data
ApMT3-qF	TGTGAAGAAGAGGTTCCAGAGA	Checking expression pattern of RNA-Seq data
ApMT3-qR	TCCTAACGGGACATGAGAGAGT	Checking expression pattern of RNA-Seq data
ApMYB1-F	TTACATGTTAATGACCATGGTAGAGGGATTT	with PciⅠ site, amplifying ApMYB1 ORF
ApMYB1-R	TTCACGTGTTAAATTGCATATTCTTCTTCTGTGT	with PmlⅠ site, amplifying ApMYB1 ORF
ApMYB1-qF	GCCGCCATCGTCATCATTATCAA	qPCR measurement of ApMYB1 in Acer palmatum leaves
ApMYB1-qR	TCATAGAGGTCGTTGCTGGAGTT	qPCR measurement of ApMYB1 in Acer palmatum leaves
ApUBQ-qF	AGGCCAAAATTCAGGACAAG	putative UBQ gene for qPCR measurement of ApMYB1
ApUBQ-qR	CGAAGGACAAGATGCAGAGTAG	putative UBQ gene for qPCR measurement of ApMYB1
NtActin-qF	AATGATCGGAATGGAAGCTG	Internal reference for qPCR checking expression level in tobacco
NtActin-qR	TGGTACCACCACTGAGGACA	Internal reference for qPCR checking expression level in tobacco
